# Supplementary material for: Insights into the Antimicrobial Activities and Metabolomes of Aquimarina (Flavobacteriaceae, Bacteroidetes) Species from the Rare Marine Biosphere
Source: Mar Drugs. 2022 Jun 28;20(7):423. doi: 10.3390/md20070423 (PMC9323603; doi:10.3390/md20070423)
Supplement: Supplementary file 1 [file marinedrugs-20-00423-s001.zip › SupplementaryFiles_Proof/Supplementary Tables_Proof.xlsx]

## Sheet: S1
Table S1. Sample origin, sponge taxonomic order and number of samples in which Aquimarina OTUs were found across the Sponge Microbiome Project (SMP) dataset.
		Total sample count	Nr. samples with ≥ 1 Aquimarina OTU	% Samples with Aquimarina OTUs	Sponge taxonomic Class	Sponge taxonomic Subclass
Sponge taxonomic Order	Baerida	6	5	83.3333	Calcarea	Calcaronea
	Bubarida	28	15	53.5714	Demospongiae	Heteroscleromorpha
	Suberitida	67	31	46.2687	Demospongiae	Heteroscleromorpha
	Poecilosclerida	367	135	36.7847	Demospongiae	Heteroscleromorpha
	Clionaida	147	51	34.6939	Demospongiae	Heteroscleromorpha
	Clathrinida	27	9	33.3333	Calcarea	Calcinea
	Axinellida	257	68	26.4591	Demospongiae	Heteroscleromorpha
	Tethyida	12	3	25	Demospongiae	Heteroscleromorpha
	Dendroceratida	9	2	22.2222	Demospongiae	Keratosa
	Dictyoceratida	731	160	21.8878	Demospongiae	Ceractinomorpha
	Verongiida	161	31	19.2547	Demospongiae	Verongimorpha
	Biemnida	6	1	16.6667	Demospongiae	Heteroscleromorpha
	Haplosclerida	401	51	12.7182	Demospongiae	Heteroscleromorpha
	Chondrillida	71	9	12.6761	Demospongiae	Verongimorpha
	Hexactinosida	9	1	11.1111	Hexactinellida	Hexasterophora
	Agelasida	47	5	10.6383	Demospongiae	Heteroscleromorpha
	Plakinidae (family)	74	6	8.10811	Homoscleromorpha	NA
	Tetractinellida	225	13	5.77778	Demospongiae	Heteroscleromorpha
Sample origin	algal tissue	1	1	100
	biofilm	20	19	95
	marine sediment	54	43	79.6296
	seawater	300	216	72
	sponge	2996	687	22.9306
	freshwater	3	0	0

## Sheet: S2
Table S2. Identification and general information of the Aquimarina strains analysed in this study.
Species	Strain	Detailed name	Closest type strain*	Isolation source	Country	Geographic area	Locality	Latitude/Longitude	Collection date	Natural host	Isolate 16S rRNA gene sequence	Isolate 16S rRNA gene acession number	Genome accession number (GenBank)	Reference to genome assembly
Aquimarina sp.	Aq78	Aquimarina sp. Aq78	Aquimarina macrocephali JAMB N27 GCA 000520995T (94.84% ANI)	marine sponge	Portugal	Algarve	Gale Alta; Armacao de Pera	37.069333; -8.331139	2010-06-16	Sarcotragus spinosulus	AGTCGAGGGGTAACAGGAGTGCTTGCACTCGCTGACGACCGGCGCACGGGTGCGTAACGCGTATAGAATCTACCTTATAGTAAGGGATAGCCCAGAGAAATTTGGATTAATACCTTATAGTATCTTAAGTGAGCATTCACTAAGGATTAAAGATTTATTGCTATAAGATGACTATGCGTTCTATTAGCTAGTTGGTATGGTAACGGCATACCAAGGCTACGATAGATAGGGGTCCTGAGAGGGAGATCCCCCACACTGGTACTGAGACACGGACCAGACTCCTACGGGAGGCAGCAGTGAGGAATATTGGACAATGGAGGCAACTCTGATCCAGCCATGCCGCGTGTAGGAAGACTGCCCTATGGGTTGTAAACTACTTTTATAGAGGAAGAAACAATA…	HE818244.1	GCA_943416075	This study
Aquimarina sp.	Aq107	Aquimarina sp. Aq107	Aquimarina latercula DSM 2041 GCA 000430645T (94.22% ANI)	marine sponge	Portugal	Algarve	Gale Alta; Armacao de Pera	37.069333; -8.331140	2010-06-16	Sarcotragus spinosulus	AGTCGAGGGGTAACGTGAGTGCTTGCACTTGACGACGACCGGCGCACGGGTGCGTAACGCGTATAGAACCTACCTTATAGTAAGGGATAGCCCAGAGAAATTTGGATTAATACCTTATAGTATGATAAGATGGCATCATTTAATCATTAAAGATTTATTGCTATAAGATGGCTATGCGTTCTATTAGCTAGTTGGTATGGTAACGGCATACCAAGGCAACGATAGATAGGGGTCCTGAGAGGGAGATCCCCCACACTGGTACTGAGACACGGACCAGACTCCTACGGGAGGCAGCAGTGAGGAATATTGGACAATGGAGGCAACTCTGATCCAGCCATGCCGCGTGTAGGAAGACTGCCCTATGGGTTGTAAACTACTTTTATAGAGGAAGAAACAGTT…	HE818268.1	GCA_943733665	This study
Aquimarina sp.	Aq135	Aquimarina sp. Aq135	Aquimarina atlantica GCA 000626715T (74.81% AAI)	marine sponge	Portugal	Algarve	Gale Alta; Armacao de Pera	37.069333; -8.331141	2010-06-16	Ircinia variabilis	AGTCGAGGGGTAACAGGAGTAGCTTGCTATTTGCTGACGACCGGCGCACGGGTGCGTAACGCGTATAGAATCTACCTTATAGTAAAGGATAGCCCAGAGAAATTTGGATTAATACTTTATAGTATCAAAAGACAACCTTGTTTTATGATTAAAGATTTATCGCTATAAGATGACTATGCGTTCTATTAGCTAGTTGGTATGGTAACGGCATACCAAGGCTACGATAGATAGGGGTCCTGAGAGGGAGATCCCCCACACTGGTACTGAGACACGGACCAGACTCCTACGGGAGGCAGCAGTGAGGAATATTGGACAATGGAGGCAACTCTGATCCAGCCATGCCGCGTGTAGGAAGACTGCCCTATGGGTTGTAAACTACTTTTATAGAGGAAGAAACAA…	HE818118.1	GCA_921010045.1	[23]
Aquimarina sp.	Aq349	Aquimarina sp. Aq349	Aquimarina megaterium XH134 GCA 000520975T (93.65% ANI)	marine sponge	Portugal	Algarve	Gale Alta; Armacao de Pera	37.069333; -8.331142	2010-06-16	Sarcotragus spinosulus	AGTCGAGGGGTAACAGGAGTGCTTGCACTCGCTGACGACCGGCGCACGGGTGCGTAACGCGTATAGTACCTACCTTATAGTAAGGGATAGCCCAGAGAAATTTGGATTAATACCTTATAGTATCTTAAGTGAGCCTTCACTAAGGATTAAAGATTTATCGCTATAAGATGGCTATGCGTTCTATTAGCTAGTTGGTATGGTAACGGCATACCAAGGCTACGATAGATAGGGGTCCTGAGAGGGAGATCCCCCACACTGGTACTGAGACACGGACCAGACTCCTACGGGAGGCAGCAGTGAGGAATATTGGACAATGGAGGCAACTCTGATCCAGCCATGCCGCGTGTAGGAAGACTGCCCTATGGGTTGTAAACTACTTTTATAGAGGAAGAAACCATT…	HE818385.1	GCA_943373825	This study
Aquimarina sp.	EL33	Aquimarina sp. EL33	Aquimarina megaterium XH134 GCA 000520975T (93.61% ANI)	octocoral	Portugal	Algarve	Pedra da Greta	36.979778; -7.989111	2015-03-02	Eunicella labiata	ACCTACCTTATAGTAAGGGATAGCCCAGAGAAATTTGGATTAATACCTTATAGTATCTTAAGTGAGCCTTCACTAAGGATTAAAGATTTATCGCTATAAGATGGCTATGCGTTCTATTAGCTAGTTGGTATGGTAACGGCATACCAAGGCTACGATAGATAGGGGTCCTGAGAGGGAGATCCCCCACACTGGTACTGAGACACGGACCAGACTCCTACGGGAGGCAGCAGTGAGGAATATTGGACAATGGAGGCAACTCTGATCCAGCCATGCCGCGTGTAGGAAGACTGCCCTATGGGTTGTAAACTACTTTTATAGAGGAAGAAACCATTCCACGTGTGGAATGCTGACGGTACTCTACGAATAAGGATCGGCTAACTCCGTGCCAGCAGCCGCGGT…	MF461393.1	GCA_900089995.1	[14]
Aquimarina sp.	EL43	Aquimarina sp. EL43	Aquimarina megaterium XH134 GCA 000520975T (98.75% ANI)	octocoral	Portugal	Algarve	Pedra da Greta	36.979778; -7.989112	2015-03-02	Eunicella labiata	AGTCGAGGGGTAACATAGTTGCTTGCAACTGATGACGACCGGCGCACGGGTGCGTAACGCGTATAGTACCTACCTTATAGTAAGGGATAGCCCAGAGAAATTTGGATTAATACCTTATAGTATCCTAAGTGAGCCTTCACTAAGGATTAAAGATTTATCGCTATAAGATGGCTATGCGTTCTATTAGCTAGTTGGTATGGTAACGGCATACCAAGGCTACGATAGATAGGGGTCCTGAGAGGGAGATCCCCCACACTGGTACTGAGACACGGACCAGACTCCTACGGGAGGCAGCAGTGAGGAATATTGGACAATGGAGGCAACTCTGATCCAGCCATGCCGCGTGTAGGAAGACTGCCCTATGGGTTGTAAACTACTTTTATAGAGGAAGAAACCATT…	MF461386.1	GCA_943422735	This study
A. muelleri	DSM 19832	Aquimarina muelleri Nedashkovskaya et al. 2005 emend. Yu et al. 2013	Type strain	seawater	Sea of Japan	Gulf of Peter the Great	Amursky Bay	-	2000-06-01	NA	GCTAGCGGCAGGCTTAACACATGCAAGTCGAGGGGTAACAGGTAGCTTGCTATGCTGACGACCGGCGCACGGGTGCGTAACGCGTATAGAACCTACCTTATAGTAAGGGATAGCCCAGAGAAATTTGGATTAATACCTTATAGTATTGGACTGTGGCATCGCAGACTAATTAAAGATTTATTGCTATAAGATGGCTATGCGTTCTATTAGCTAGTTGGTATGGTAACGGCATACCAAGGCTACGATAGATAGGGGTCCTGAGAGGGAGATCCCCCACACTGGTACTGAGACACGGACCAGACTCCTACGGGAGGCAGCAGTGAGGAATATTGGACAATGGAGGCAACTCTGATCCAGCCATGCCGCGTGTAGGAAGACTGCCCTATGGGTTGTAAACTA…	AY608406.1	GCA_000430665.1	direct submission to RefSeq by DOE - JOINT GENOME INSTITUTE
A. latercula	DSM 2041	Aquimarina latercula (Lewin 1969) Nedashkovskaya et al. 2006	Type strain	seawater aquarium outflow	United States of America	California	La Jolla	-	1965	NA	CACGATGAAGAGTTTGATCCTGGCTCAGGATNAACGCTAGCGGCAGGCTTAACACATGCAAGTCGAGGGGTAACGTGAGTGCTTGCACTTGACGACGACCGGCGCACGGGTGCGTAACGCGTATAGAACCTACCTTATAGTAAGGGATAGCCCAGAGAAATTTGGATTAATACCTTATAGTATGATAAGATGGCATCATTTAATCATTAAAGATTTATTGCTATAAGATGGCTATGCGTTCTATTAGCTAGTTGGTATGGTAACGGCATACCAAGGCAACGATAGATAGGGGTCCTGAGAGGGAGATCCCCCACACTGGTACTGAGACACGGACCAGNCTCCTACGGGAGGCAGCAGTGAGGAATATTGGACAATGGAGGCAACTCTGATCCAGCCATG…	M58769.2	GCA_000430645.1	direct submission to RefSeq by DOE - JOINT GENOME INSTITUTE
A. spongiae	DSM 22623	Aquimarina spongiae Yoon et al. 2011 emend. Park et al. 2013	Type strain	marine sponge	Republic of Korea	Jeju, coastal area		NA	2008-02-01	Halichondria oshoro	GCTTACCGTGCAAGTCGAGGGGTAACAGGAGATTGCTTGCAATCTTGCTGACGACCGGCGCACGGGTGCGTAACGCGTATAGAACCTACCTTATATTGGGGGATAGCCCAGAGAAATTTGGATTAATACCCCATGGTATGCTAGAGTGGCATCACTTTAGTATTAAAGATTTATCGATATAAGATGGCTATGCGTTCTATTAGCTAGTTGGTAAGGTAACGGCTCACCAAGGCGACGATAGATAGGGGTCCTGAGAGGGAGATCCCCCACACTGGTACTGAGACACGGACCAGACTCCTACGGGAGGCAGCAGTGAGGAATATTGGACAATGGAGGCAACTCTGATCCAGCCATGCCGCGTGCAGGAAGACTGCCCTATGGGTTGTAAACTGCTTTTAT…	FJ348470.1	GCA_900141785.1	direct submission to RefSeq by DOE - JOINT GENOME INSTITUTE
Abbreviations: NA - Not applicable; ANI - Average nucleotide identity; AAI - Average aminoacid identity.
*Analysis performed in Microbial Genomes Atlas (MiGA) webservice.

## Sheet: S3
Table S3. Identification and general information of the panel of human pathogens tested in this study.
Pathogenic strain name	Culture collection codes	Detailed name	Biosafety level	Gram staining	Taxonomic Phylum	Taxonomic Family	Isolation (year)	Isolation (place)	Isolation (host)	Isolation (source)	Genome accession number	NCBI BioSample Accession	NCBI Taxonomy ID	Url	Observations
Staphylococcus aureus 209	ATCC 6538 / DSM 799	Staphylococcus aureus subsp. aureus Rosenbach	2	+	Firmicutes	Staphylococcaceae	1951		Human	wound	GCA_002025145.1	SAMN06480665	1280	10.1099/00221287-5-5-1010
Staphylococcus aureus JE2 (MRSA)	NR-46543 (B.E.I Resources – Part of ATCC)	Staphylococcus aureus subsp. aureus, JE2	2	+	Firmicutes	Staphylococcaceae	2002	Los Angeles County Jail in California, USA	Human	skin and soft tissue			1280	https://www.beiresources.org/Catalog/Bacteria/NR-46543.aspx	S. aureus subsp. aureus, strain JE2 is a plasmid-cured derivative of strain LAC that was isolated in 2002 from a skin and soft tissue infection of an inmate in the Los Angeles County Jail in California, USA. Strain JE2 is a methicillin-resistant S. aureus (MRSA) strain and is a USA300 isolate. USA300 is the most common cause of community-associated MRSA infection and an increasing cause of hospit…
Pseudomonas aeruginosa PAO1	DSM 19880	Pseudomonas aeruginosa PAO1 (Reference)	2	-	Proteobacteria	Pseudomonadaceae		Australia: Melbourne	Human	wound	GCF_000006765.1	SAMN02603714	208964
Escherichia coli Seattle 1946	ATCC 25922 / DSM 1103	Escherichia coli Seattle 1946, Serotype O6 Reference Strain	1	-	Proteobacteria	Enterobacteriaceae	1946	Seattle, Washington	Human				1322345		Escherichia coli, a seemingly ubiquitous Gram-negative bacterium, is best known for its ability to cause food-borne outbreaks. The strain ATCC 25922 is a commonly used quality control strain, particularly in antibody sensitivity assays and was originally isolated from a human clinical sample collected in Seattle and WA (1946). It is of serotype O6 and biotype 1.
Salmonella typhimurium SL1344	DSM 24522	Salmonella enterica subsp. enterica serovar Typhimurium SL1344	2	-	Proteobacteria	Enterobacteriaceae			Human		GCA_000210855.2			PMID: 22538806
Candida glabrata KCHr606	NA***	Candida glabrata KCHr606	1	NA	Ascomycota	Cryptococcaceae					NA	NA	5478
Candida albicans SC5314	ATCC MYA-2876	Candida albicans SC5314	1	NA	Ascomycota	Cryptococcaceae					GCA_000182965.3	SAMN02953594	237561	http://www.candidagenome.org/Strains.shtml	Wild-type strain. The original strain background from which most of the common laboratory strains are derived. This strain is virulent in a mouse model of systemic infection and is frequently used as a wild-type control.
Abbreviations: NA - Not applicable.
***Candida glabrata KCHr606 originates from the laboratory of Professor Hiroji Chibana, Chiba University, Japan

## Sheet: S4
Table S4. Identification and general information the panel of marine bacterial isolates tested in this study.
Species	Strain	Best RDP match (16S rRNA gene Accession Number)	Gram staining	Taxonomic Phylum	Taxonomic Family	Isolation source	Country	Geographic area	Locality	Latitude/Longitude	Collection date	Natural host	16S rRNA gene sequence	16S rRNA gene Acession Number	Genome accession number (GenBank)	Reference to isolate
Vibrio sp.	EL22	Vibrio crassostreae (T); CAIM 1405; LGP 7; LMG 22240; CIP 108327; EF094887; Vibrio gigantis (T); CAIM 25; LGP 13; LMG 22741; CIP 108656; EF094888	-	Proteobacteria	Vibrionaceae	octocoral	Portugal	Algarve	Pedra da Greta	36.979778; -7.989112	2015-03-02	Eunicella labiata	TTAATGGGCGTCGAGCGGCGGACGGGTGAGTAATGCCTAGGAAATTGCCTTGATGTGGGGGATAACCATTGGAAACGATGGCTAATACCGCATAATGCCTACGGGCCAAAGAGGGGGACCTTCGGGCCTCTCGCGTCAAGATATGCCTAGGTGGGATTAGCTAGTTGGTGAGGTAATGGCTCACCAAGGCGACGATCCCTAGCTGGTCTGAGAGGATGATCAGCCACACTGGAACTGAGACACGGTCCAGACTCCTACGGGAGGCAGCAGTGGGGAATATTGCACAATGGGCGAAAGCCTGATGCAGCCATGCCGCGTGTATGAAGAAGGCCTTCGGGTTGTAAAGTACTTTCAGTTGTGAGGAAGGGGGTGTTGTTAATAGCAACATCTCTTGACGTT…	MF461380	NA	[4]
Vibrio sp.	EL36	Vibrio crassostreae (T); CAIM 1405; LGP 7; LMG 22240; CIP 108327; EF094887; Vibrio gigantis (T); CAIM 25; LGP 13; LMG 22741; CIP 108656; EF094888	-	Proteobacteria	Vibrionaceae	octocoral	Portugal	Algarve	Pedra da Greta	36.979778; -7.989112	2015-03-02	Eunicella labiata	GCGGAAACGACACTAACAATCCTTCGGGTGCGTTAATGGGCGTCGAGCGGCGGACGGGTGAGTAATGCCTAGGAAATTGCCTTGATGTGGGGGATAACCATTGGAAACGATGGCTAATACCGCATAATGCCTACGGGCCAAAGAGGGGGACCTTCGGGCCTCTCGCGTCAAGATATGCCTAGGTGGGATTAGCTAGTTGGTGAGGTAATGGCTCACCAAGGCGACGATCCCTAGCTGGTCTGAGAGGATGATCAGCCACACTGGAACTGAGACACGGTCCAGACTCCTACGGGAGGCAGCAGTGGGGAATATTGCACAATGGGCGAAAGCCTGATGCAGCCATGCCGCGTGTATGAAGAAGGCCTTCGGGTTGTAAAGTACTTTCAGTTGTGAGGAAGG…	MF461379	NA	[4]
Vibrio sp.	EL38	Vibrio crassostreae (T); CAIM 1405; LGP 7; LMG 22240; CIP 108327; EF094887	-	Proteobacteria	Vibrionaceae	octocoral	Portugal	Algarve	Pedra da Greta	36.979778; -7.989112	2015-03-02	Eunicella labiata	AGTCGAGCGGAAACGACACTAACAATCCTTCGGGTGCGTTAATGGGCGTCGAGCGGCGGACGGGTGAGTAATGCCTAGGAAATTGCCTTGATGTGGGGGATAACCATTGGAAACGATGGCTAATACCGCATAATGCCTACGGGCCAAAGAGGGGGACCTTCGGGCCTCTCGCGTCAAGATATGCCTAGGTGGGATTAGCTAGTTGGTGAGGTAATGGCTCACCAAGGCGACGATCCCTAGCTGGTCTGAGAGGATGATCAGCCACACTGGAACTGAGACACGGTCCAGACTCCTACGGGAGGCAGCAGTGGGGAATATTGCACAATGGGCGAAAGCCTGATGCAGCCATGCCGCGTGTATGAAGAAGGCCTTCGGGTTGTAAAGTACTTTCAGTTGTGA…	MF461378	NA	[4]
Vibrio sp.	EL41	Vibrio breoganii (T); LMG 23858; EF599161	-	Proteobacteria	Vibrionaceae	octocoral	Portugal	Algarve	Pedra da Greta	36.979778; -7.989112	2015-03-02	Eunicella labiata		MF461384	NA	[4]
Vibrio sp.	EL49	Vibrio atlanticus (T); LMG 24300; EF599163	-	Proteobacteria	Vibrionaceae	octocoral	Portugal	Algarve	Pedra da Greta	36.979778; -7.989112	2015-03-02	Eunicella labiata		MF461381	NA	[4]
Vibrio sp.	EL62	Vibrio crassostreae (T); CAIM 1405; LGP 7; LMG 22240; CIP 108327; EF094887; Vibrio gigantis (T); CAIM 25; LGP 13; LMG 22741; CIP 108656; EF094888	-	Proteobacteria	Vibrionaceae	octocoral	Portugal	Algarve	Pedra da Greta	36.979778; -7.989112	2015-03-02	Eunicella labiata		MF461385	NA	[4]
Vibrio sp.	EL67	Vibrio kanaloae (T); type strain: LMG 20539; AM162657	-	Proteobacteria	Vibrionaceae	octocoral	Portugal	Algarve	Pedra da Greta	36.979778; -7.989112	2015-03-02	Eunicella labiata		MF461382	NA	[4]
Vibrio sp.	EL112	Vibrio atlanticus (T); LMG 24300; EF599163	-	Proteobacteria	Vibrionaceae	octocoral	Portugal	Algarve	Pedra da Greta	36.979778; -7.989112	2015-03-02	Eunicella labiata		MF461383	NA	[4]
Micrococcus sp.	Mc110	Micrococcus aloeverae (T); AE6; KF524364	+	Actinobacteria	Micrococcaceae	marine sponge	Portugal	Algarve	Gale Alta; Armação de Pera	37.069333; 8.331139	2010-06-16	Sarcotragus spinosulus	GTCGAACGATGAAGCCCAGCTTGCTGGGTGGATTAGTGGCGAACGGGTGAGTAACACGTGAGTAACCTGCCCTTAACTCTGGGATAAGCCTGGGAAACTGGGTCTAATACCGGATAGGAGCGCCtACCGCATGGTGGGTGTTGGAAAGATTTATCGGTTTTGGATGGACTCGCGGCCTATCAGCTTGTTGGTGAGGTAATGGCTCACCAAGGCGACGACGGGTAGCCGGCCTGAGAGGGTGACCGGCCACACTGGGACTGAGACACGGCCCAGACTCCTACGGGAGGCAGCAGTGGGGAATATTGCACAATGGGCGCAAGCCTGATGCAGCGACGCCGCGTGAGGGATGACGGCCTTCGGGTTGTAAACCTCTTTCAGTAGGGAAGAAGCGAAAGTGAC…	HE818271.1	NA	[20]
Pseudovibrio sp.	Pv125	Pseudovibrio japonicus (T); WSF2 (= IAM 15442, = NCIMB 14279); AB246748	-	Proteobacteria	Stappiaceae	marine sponge	Portugal	Algarve	Gale Alta; Armação de Pera	37.069333; 8.331139	2010-06-16	Sarcotragus spinosulus	AGTCGAACGGATCCTTCGGGATTAGTGGCAGACGGGTGAGTAACGCGTGGGAAGCTACCTTGTGGTAGGGAACAACAGTTGGAAACGACTGCTAATACCCTATGAGCCCTATGGGGGAAAGATTTATCGCCATGAGATGTGCCCGCGTTAGATTAGCTAGTTGGTAAGGTAATGGCTTACCAAGGCGACGATCTATAGCTGGTCTGAGAGGATGATCAGCCACACTGGGACTGAGACACGGCCCAGACTCCTACGGGAGGCAGCAGTGGGGAATATTGGACAATGGGGGCAACCCTGATCCAGCCATGCCGCGTGTGTGATGACGGCCTTAGGGTTGTAAAGCACTTTCAGCAGTGAAGATAATGACATTAACTGCAGAAGAAGCCCCGGCTAACTTCG…	HE818282.1	NA	[20]
Roseibium album	EL143	Roseibium album (T); CECT 5094, AJ878875	-	Proteobacteria	Stappiaceae	octocoral	Portugal	Algarve	Pedra da Greta	36.979778; -7.989112	2015-03-02	Eunicella labiata	TGCAAGTCGAACGAACTCTTCGGAGTTAGTGGCAGACGGGTGAGTAACGCGTGGGAACCTACCTTTAGGTACGGAACAACAGTTGGAAACGACTGCTAATACCGTATGAGCCCTATGGGGGAAAGATTTATCGCCTAAGGATGGGCCCGCGTTGGATTAGCTAGTTGGTGGGGTAAAGGCCTACCAAGGCGACGATCCATAGCTGGTCTGAGAGGATGATCAGCCACACTGGGACTGAGACACGGCCCAGACTCCTACGGGAGGCAGCAGTGGGGAATATTGGACAATGGGGGCAACCCTGATCCAGCCATGCCGCGTGAGTGATGAAGGCCCTAGGGTTGTAAAGCTCTTTCAGCGAGGAGGATAATGACGTTACTCGCAGAAGAAGCCCCGGCTAAC…	MF461364	GCA_900258415.1	[4]

## Sheet: S5
Table S5. "Cleaned-up" feature list of feature-based molecular networking (FBMN) results of all Aquimarina extracts analysed in this study.
In this table, the data collected in positive and negative ion modes are merged.
Cluster	Selected feature	Annotation result	Annotation warning	Cluster size	Ionization source	Alignment ID	Average RT* (min)	Average Mz	Adduct Type	Level	Formula	Structure	Total score	Final score	Title	MS1 count	MS/MS count	Precursor Mz	Precursor Type	Theoretical mass	Mass error	Formula score	Ontology	InChIKey	SMILES	Links	Aq78_1	Aq78_2	Aq78_3	Aq135_1	Aq135_2	Aq135_3	Aq349_1	Aq349_2	Aq349_3	Aq107_1	Aq107_2	Aq107_3	QC_1	QC_2	QC_3	QC_4	DSM19832_1	DSM19832_2	DSM19832_3	DSM2041_1	DSM2041_2	DSM2041_3	DSM22623_1
1	neg_1003	Simple ID		1	neg	1003	1.002	293.055	[M-H]-	generic	C15H19BrO	Laurinterol;[1S-(1alpha,2beta,5alpha)]-4-Bromo-2-(1,2-dimethylbicyclo[3.1.0]hex-2-yl)-5-methylphenol	3.8985	3.8985	Unknown	3	29	293.055	[M-H]-	294.062	-0.0001491	2.194	Sesquiterpenoids	UGGAHNIITODSKB-NBDSFZQWNA-N	BrC=1C=C(C(O)=CC1C)C2(C)CCC3CC32C	KNApSAcK=C00012539,ChEBI=CHEBI:66555,UNPD=UNPD184958,COCONUT=CNP0266462	0.000907154	0.00115331	0.00100456	0	0.000187755	0.000263201	0.000654352	0.00150187	0.00176805	0	0.000447252	0.00197783	0.00124759	0.00143344	0.00141706	0.00150147	0.00113342	0.000966178	0.00119997	0.00143255	0	0.0026385	0
2	neg_1020	Simple ID		1	neg	1020	27.807	293.248	[M-H]-	generic	C19H34O2	Sidnutol	5.9778	5.9778	Unknown	3	18	293.248	[M-H]-	294.256	0.0006039	3.572	Naphthopyrans	NBHRPFKOSJVSLD-WBHLEZBHNA-N	OCC1(OC2(C)CCC3C(C)(C)CCCC3(C)C2CC1)C	KNApSAcK=C00023391,UNPD=UNPD178604;UNPD62717,COCONUT=CNP0221864	0	0	0	0	0	0	0	0	0	0.00097945	0.00212589	0.00324322	0	0.000306862	0.000319735	0.000303372	0	0	0	0.00140939	0.0016426	0.00164961	0
3	neg_1034	Unknown compound		1	neg	1034	6.341	296.098	[M-H]-																		0.00306403	0.00322795	0.00311844	0.00124811	0.00156069	0	0.00343368	0	0	0	0	0.00312253	0.00198554	0	0	0	0	0	0	0	0	0	0
4	neg_1039	Simple ID		1	neg	1039	5.775	296.1	[M-H]-	generic	C11H15N5O5	2-Methylguanosine	7.5132	7.5132	Unknown	3	32	296.1	[M-H]-	297.107	-0.0001579	4.138	Purine nucleosides	SLEHROROQDYRAW-KQYNXXCUSA-N	O=C1N=C(NC2=C1N=CN2C3OC(CO)C(O)C3O)NC	HMDB=HMDB0005862,ChEBI=CHEBI:19702,FooDB=FDB023782,BMDB=BMDB05862,UNPD=UNPD145460,BLEXP=BLEXPDB00135501934,NPA=NPA012957,COCONUT=CNP0116170	0.00171055	0.00184566	0.00194609	0.00108596	0	0	0	0	0	0	0	0	0.00139099	0	0	0	0	0	0	0	0	0	0
5	neg_1040	Simple ID		1	neg	1040	0.999	296.1	[M-H]-	generic	C11H15N5O5	2-Methylguanosine	7.1972	7.1972	Unknown	3	44	296.1	[M-H]-	297.107	-0.0001579	3.947	Purine nucleosides	SLEHROROQDYRAW-KQYNXXCUSA-N	O=C1N=C(NC2=C1N=CN2C3OC(CO)C(O)C3O)NC	HMDB=HMDB0005862,ChEBI=CHEBI:19702,FooDB=FDB023782,BMDB=BMDB05862,UNPD=UNPD145460,BLEXP=BLEXPDB00135501934,NPA=NPA012957,COCONUT=CNP0116170	0.00129974	0.00124207	0.0010693	0.000489528	0.000547227	0.000411185	0.000646326	0.000987786	0.00113949	0	0.000897486	0.00122034	0.000924243	0.00101318	0.0010593	0.00108572	0.00054328	0.000467999	0.000615212	0.000772968	0	0.00157018	0
6	neg_1052	Simple ID		1	neg	1052	9.316	297.066	[M-H]-	generic	C11H14N4O4S	UNPD226193	6.9734	6.9734	Unknown	3	22	297.066	[M-H]-	298.074	0.0003995	4.3	Thioglycosides	KHOAKFWUEHUJTA-IOSLPCCCSA-N	OC1=NC=NC2=C1N=CN2CC3OC(SC)C(O)C3O	UNPD=UNPD226193,NPA=NPA006145,COCONUT=CNP0118608	0	0	0	0.00520721	0.00392268	0	0	0	0	0.000468291	0	0	0.000982358	0.000875373	0.000966489	0.00094747	0	0	0	0	0.000432146	0	0
7	neg_1053	Simple ID		1	neg	1053	17.286	297.134	[M-H]-	generic	C15H22O6	Toxin T2 tetrol	4.6582	4.6582	Unknown	3	27	297.134	[M-H]-	298.142	0.000762	2.914	Trichothecenes	ZAXZBJSXSOISTF-UHFFFAOYNA-N	OCC12CC(O)C(=CC2OC3C(O)C(O)C1(C)C43OC4)C	HMDB=HMDB0036159,KNApSAcK=C00012637,T3DB=T3D3714,FooDB=FDB015012,UNPD=UNPD155691,BLEXP=BLEXPDB00000599328,COCONUT=CNP0117685	0	0	0	0.00084923	0.000508129	0.000456893	0	0	0	0	0	0	0.000332322	0.000326965	0.000320212	0.000360417	0	0	0	0	0	0	0
8	neg_107	Simple ID		1	neg	107	12.532	163.04	[M-H]-	generic	C9H8O3	4-Hydroxycinnamic acid	9.3055	9.3055	Unknown	3	23	163.04	[M-H]-	164.047	-3.23e-05	5.222	Hydroxycinnamic acids	NGSWKAQJJWESNS-ZZXKWVIFSA-N	O=C(O)C=CC1=CC=C(O)C=C1	HMDB=HMDB0002035;HMDB0030677;HMDB0128076,KNApSAcK=C00000152;C00000580;C00026316;C00038791,ChEBI=CHEBI:17450;CHEBI:32373;CHEBI:32374;CHEBI:36090;CHEBI:12876;CHEBI:58152,DrugBank=DB04066,YMDB=YMDB00498,FooDB=FDB002592;FDB002593;FDB002594;FDB004146;FDB030490,NANPDB=NANPDB_1223;NANPDB_2208;NANPDB_2217;NANPDB_3176;NANPDB_3304;NANPDB_3447;NANPDB_3450;NANPDB_3535;NANPDB_4504;NANPDB_4508,STOFF=STOFF_1011…	0.00425244	0.00660161	0.00663563	0.000520205	0.000298537	0	0.0183292	0.0137427	0.0134414	0.00312239	0.00177885	0.0068149	0.00354588	0.0029373	0.00294789	0.0029765	0.000544592	0.000560455	0.000526156	0.00964788	0.0133697	0.00655899	0
9	neg_1076	Simple ID		1	neg	1076	7.763	299.087	[M-H]-	generic	C12H16N2O7	2-(hydroxymethyl)-5-[(4-methoxy-2-nitrophenyl)amino]oxolane-3,4-diol	6.0215	6.0215	Unknown	3	41	299.087	[M-H]-	300.096	0.0014744	3.518		FWQYZYBZRPETDU-UHFFFAOYSA-N	O=[N+]([O-])C1=CC(OC)=CC=C1NC2OC(CO)C(O)C2O	COCONUT=CNP0364050	0	0	0	0	0	0	0	0.00149841	0.00153158	0	0	0	0	0.000327216	0.000344974	0.000346659	0	0	0	0	0	0	0
10	neg_1103	Simple ID		1	neg	1103	11.857	300.134	[M-H]-	generic	C16H19N3O3	Isofebrifugine	6.5402	6.5402	Unknown	3	41	300.134	[M-H]-	301.143	0.000965	3.63	Quinazolines	YLYLCQRQSRDSQR-LXVQFQBENA-N	O=C1C=2C=CC=CC2N=CN1CC3(O)OC4CCCNC4C3	KNApSAcK=C00002175,ChEBI=CHEBI:6008,UNPD=UNPD191434;UNPD82340;UNPD84941,BLEXP=BLEXPDB00009851693,COCONUT=CNP0197766	0	0	0	0.00053076	0.00035741	0.000383382	0.000554883	0	0.000446656	0.00148743	0.00115491	0.00115577	0.000388122	0.000355981	0.000359067	0.000356948	0	0.000187459	0	0.000612566	0.000465872	0.0004204	0
11	neg_1110	Simple ID		1	neg	1110	21.979	300.217	[M-H]-	generic	C16H31NO4	3-(dimethylamino)propyl 3-(2,2-dimethyloxan-4-yl)-3-hydroxybutanoate	6.4152	6.4152	Unknown	3	30	300.217	[M-H]-	301.225	0.001432	3.93		DOOPQZWBQGMYGP-UHFFFAOYSA-N	O=C(OCCCN(C)C)CC(O)(C)C1CCOC(C)(C)C1	COCONUT=CNP0411509	0	0	0	0.00863256	0.00766346	0.0078281	0	0	0	0	0	0	0.00149785	0.00157919	0.00160651	0.00160222	0	0	0	0	0	0	0
12	neg_1166	Simple ID		1	neg	1166	18.639	307.154	[M-H]-	generic	C17H24O5	Dihydrocumambrin A	6.9255	6.9255	Unknown	3	26	307.154	[M-H]-	308.162	0.0006974	3.973	Guaianolides and derivatives	ACKIMLHJQRKFGM-UHFFFAOYNA-N	O=C(OC1CC(O)(C)C2CC=C(C)C2C3OC(=O)C(C)C13)C	HMDB=HMDB0036489,KNApSAcK=C00020480,FooDB=FDB015386,NANPDB=NANPDB_5516,UNPD=UNPD90222,COCONUT=CNP0348617	0.00060868	0.000375117	0.000440063	0	0	0	0.00117225	0.00116615	0.0011137	0	0	0	0	0.000344563	0.000345464	0	0	0	0	0	0	0	0
13	neg_1178	Unknown compound		1	neg	1178	15.059	308.16	[M-H]-																		0.00102894	0.000995218	0.000982813	0	0	0	0	0	0	0.0015957	0.00146654	0.00150148	0	0.000353587	0.000365266	0.000357938	0	0	0	0	0.000413774	0	0
14	neg_1179	Unknown compound		1	neg	1179	14.352	308.16	[M-H]-																		0.00094373	0.000958627	0.00104812	0.000326525	0.000241378	0.000247433	0.000545976	0.000472335	0.000473833	0.000865582	0.000714333	0.000863692	0.000509822	0.000407047	0.000432962	0.000433755	0.000308771	0.000220635	0.000239572	0.000753774	0.000558164	0.000489198	0
15	neg_1195	Simple ID		1	neg	1195	12.672	309.159	[M-H]-	generic	C19H22N2O2	Sarpagine	4.4724	4.4724	Unknown	3	28	309.159	[M-H]-	310.168	0.0014515	2.618	Macroline alkaloids	VTVQHYQGTTVKDE-WFWJICBNNA-N	OC=1C=CC=2NC3=C(C2C1)CC4N5CC(=CC)C(CC35)C4CO	KNApSAcK=C00001767,ChEBI=CHEBI:9036,PubChem=44592554;20055020,PlantCyc=CPD-4243,UNPD=UNPD118722;UNPD127559;UNPD141970;UNPD158381;UNPD44781;UNPD211594,COCONUT=CNP0205381	0	0	0	0	0	0	0	0	0	0	0	0	0.000344319	0	0	0	0.000564613	0.000718635	0.0005184	0	0	0	0
16	neg_1208	Simple ID		1	neg	1208	8.032	310.115	[M-H]-	generic	C12H17N5O5	N2,N2-Dimethylguanosine	7.1772	7.1772	Unknown	3	28	310.115	[M-H]-	311.123	0.0005922	4.066	Purine nucleosides	RSPURTUNRHNVGF-IOSLPCCCSA-N	O=C1N=C(NC2=C1N=CN2C3OC(CO)C(O)C3O)N(C)C	HMDB=HMDB0004824,ChEBI=CHEBI:19289,FooDB=FDB023432,STOFF=STOFF_8486,BMDB=BMDB04824,Urine=HMDB0004824,Serum=HMDB0004824,UNPD=UNPD52254,BLEXP=BLEXPDB00135501639,NPA=NPA013570,COCONUT=CNP0296650	0	0	0	0	0	0	0	0	0	0	0	0	0	0	0.00239315	0.00225989	0.0016316	0.00152452	0.0016459	0.00379958	0.00469783	0.00389929	0
17	neg_1209	Simple ID		1	neg	1209	7.949	310.115	[M-H]-	generic	C12H17N5O5	N2,N2-Dimethylguanosine	7.7191	7.7191	Unknown	3	32	310.115	[M-H]-	311.123	0.0005922	4.36	Purine nucleosides	RSPURTUNRHNVGF-IOSLPCCCSA-N	O=C1N=C(NC2=C1N=CN2C3OC(CO)C(O)C3O)N(C)C	HMDB=HMDB0004824,ChEBI=CHEBI:19289,FooDB=FDB023432,STOFF=STOFF_8486,BMDB=BMDB04824,Urine=HMDB0004824,Serum=HMDB0004824,UNPD=UNPD52254,BLEXP=BLEXPDB00135501639,NPA=NPA013570,COCONUT=CNP0296650	0.00308105	0.00323967	0.00311285	0.00148587	0.00146176	0	0.00365494	0.00340552	0.0035175	0.00407598	0.00318148	0.00302257	0.00208007	0.00228435	0	0	0	0	0	0	0	0	0
18	neg_1213	Simple ID		1	neg	1213	12.355	310.141	[M-H]-	generic	C14H21N3O5	3-(5-ethyl-2,4-dioxo-1,2,3,4-tetrahydropyrimidin-1-yl)-2-[(oxan-4-yl)amino]propanoic acid	7.2078	7.2078	Unknown	3	38	310.141	[M-H]-	311.148	0.0001443	4.224	Alpha amino acids	SEYBXTXLRFNBAU-UHFFFAOYSA-N	O=C1NC(=O)N(C=C1CC)CC(NC2CCOCC2)C(=O)O	COCONUT=CNP0004100	0.0025671	0.00276946	0.00268306	0.000326177	0.000286434	0.000287403	0.00103817	0.000765905	0.000790229	0.00289143	0.0019292	0.00245269	0.00123537	0.00112422	0.00112888	0.00115939	0.000563655	0.000448412	0.000458245	0.0011578	0.0010276	0.00123555	0
19	neg_1214	Simple ID		1	neg	1214	8.738	310.176	[M-H]-	generic	C15H25N3O4	UNPD213019	5.4213	5.4213	Unknown	3	39	310.176	[M-H]-	311.185	0.0013298	3.062	Pyrrolidine carboxylic acids	VXIDNRDRDTVAPE-LPWJVIDDSA-N	O=C(O)C1CC(C=C(C)C)N2C(=N)N(CC(O)CCO)CC21	UNPD=UNPD213019,COCONUT=CNP0126968	0	0	0	0	0	0	0	0.000813724	0.000901401	0.00107933	0.000724076	0.00131502	0	0.000610482	0.000637967	0.000646786	0	0	0	0	0.00066118	0	0
20	neg_1226	Simple ID		1	neg	1226	17.275	311.186	[M-H]-	generic	C17H28O5	Dihydrobotrydial	6.9889	6.9889	Unknown	3	45	311.186	[M-H]-	312.194	0.0007975	3.897	Oxanes	QUGYVDURDBEQRB-HOKYYWRLNA-N	O=C(OC1CC(C)C2C(O)OCC3(C)CC(C)(C)C1C23O)C	KNApSAcK=C00021573,UNPD=UNPD14181;UNPD29928,NPA=NPA009071;NPA019254,COCONUT=CNP0232876	0	0	0	0	0	0	0	0	0	0	0	0	0.00388948	0.00401733	0.0040338	0.00395802	0.0144809	0.015614	0.0144458	0	0	0	0
21	neg_1240	Unknown compound		1	neg	1240	10.539	312.191	[M-H]-																		0.00132177	0.00140654	0.00148352	0	0	0	0	0.000696068	0.000712393	0.00177973	0.00158807	0.00135672	0.000518404	0.000541292	0.000537575	0.000536917	0	0	0	0	0	0	0
22	neg_1245	Simple ID		1	neg	1245	21.672	312.217	[M-H]-	generic	C17H31NO4	9-Decenoylcarnitine	5.5892	5.5892	Unknown	3	34	312.217	[M-H]-	313.225	0.001232	3.268	Acyl carnitines	GOOOCIIXFLVRAG-UHFFFAOYNA-N	O=C([O-])CC(OC(=O)CCCCCCCC=C)C[N+](C)(C)C	HMDB=HMDB0013205,ChEBI=CHEBI:88543,YMDB=YMDB01528,FooDB=FDB029331,LipidMAPS=LMFA07070048,Urine=HMDB0013205,Serum=HMDB0013205,BLEXP=BLEXPDB00053481651,COCONUT=CNP0085207	0	0	0	0.00134366	0.00161444	0.00136377	0	0	0	0	0	0	0	0.000334717	0.00034786	0.000331354	0	0	0	0	0	0	0
23	neg_1269	Simple ID		1	neg	1269	12.943	314.113	[M-H]-	generic	C16H17N3O4	Maremycin D1;(-)-Maremycin D1	7.1403	7.1403	Unknown	3	47	314.113	[M-H]-	315.122	0.0011296	3.938	Alpha amino acids and derivatives	NTPFTKSDGMODKY-LBIQJVOKNA-N	O=C1NC(C(=O)NC1=C)C(C)C2(O)C(=O)N(C=3C=CC=CC32)C	KNApSAcK=C00027019;C00027020,UNPD=UNPD115690;UNPD143118,NPA=NPA004539;NPA007266,COCONUT=CNP0196496	0.00130377	0.00155552	0.00129302	0	0	0	0	0	0	0.0157928	0.00679174	0.00639312	0.00258012	0.00198921	0.00213034	0.00215362	0.00085784	0.00187836	0.000988316	0.0142078	0.0132967	0.0168468	0.000743688
24	neg_1270	Simple ID		1	neg	1270	10.267	314.114	[M-H]-	generic	C16H17N3O4	Maremycin D1;(-)-Maremycin D1	6.5191	6.5191	Unknown	3	38	314.114	[M-H]-	315.122	0.0010296	3.568	Alpha amino acids and derivatives	NTPFTKSDGMODKY-LBIQJVOKNA-N	O=C1NC(C(=O)NC1=C)C(C)C2(O)C(=O)N(C=3C=CC=CC32)C	KNApSAcK=C00027019;C00027020,UNPD=UNPD115690;UNPD143118,NPA=NPA004539;NPA007266,COCONUT=CNP0196496	0	0.000554472	0	0	0	0	0.000807634	0.000709718	0.000762366	0.000517186	0	0	0	0.00037265	0	0.000406695	0.000255014	0.000233372	0.000249072	0	0.000807455	0.000479293	0
25	neg_128	Simple ID		1	neg	128	16.154	167.071	[M-H]-	generic	C9H12O3	UNPD129685	6.6382	6.6382	Unknown	3	24	167.071	[M-H]-	168.079	0.0001678	4.061	Medium-chain fatty acids	PILZQFAVBOKECT-UHFFFAOYSA-N	O=C1C=C1CCCCCC(=O)O	UNPD=UNPD129685,NPA=NPA012240,COCONUT=CNP0320876	0.00379804	0.00365851	0.00353321	0.00525404	0.00353529	0.00328648	0.00767431	0.00837037	0.00765966	0.00311295	0.00346169	0.00544659	0.00281475	0.00270471	0.00270397	0.00279008	0.000942729	0.000734052	0.000976718	0.00221619	0.00179929	0.00152295	0
26	neg_1302	Simple ID		1	neg	1302	13.714	317.114	[M-H]-	generic	C16H18N2O5	5-{1-[2-(3-methoxyphenyl)acetamido]ethyl}-3-methyl-1,2-oxazole-4-carboxylic acid	6.268	6.268	Unknown	3	39	317.114	[M-H]-	318.122	-4.8e-06	3.697	Phenylacetamides	RLTHKOUCAALZCE-UHFFFAOYSA-N	O=C(O)C=1C(=NOC1C(NC(=O)CC=2C=CC=C(OC)C2)C)C	COCONUT=CNP0015416	0.000646744	0.000670362	0.00064375	0.000335324	0.000262339	0	0.000585629	0	0	0.000887468	0.000657554	0.000714291	0.000474014	0.000393885	0.000402367	0.00037902	0.0003159	0.000266439	0.000247671	0.000728045	0.000777913	0.000760726	0
27	neg_1304	Simple ID		1	neg	1304	16.569	317.15	[M-H]-	generic	C17H22N2O4	Daryamide C;(-)-Daryamide C	6.7971	6.7971	Unknown	3	43	317.15	[M-H]-	318.158	0.0002807	3.866	Tertiary alcohols	ZQYBDDWUEWCXIM-GGWOSOGENA-N	O=C(C=CC=CC(C)C)NC1=CC(O)(C=CC1=O)CCC(=O)N	KNApSAcK=C00041482,UNPD=UNPD108128,NPA=NPA000029,COCONUT=CNP0391148	0.00115827	0.00113927	0.00115315	0.000326809	0.000303359	0.000304237	0.000500419	0.000457534	0.000470235	0.00138005	0.00135352	0.00138407	0.00049249	0.000497521	0.000492602	0.000507732	0	0	0	0.000523694	0.000385302	0.000645477	0
28	neg_1308	Simple ID		1	neg	1308	20.428	317.233	[M-H]-	generic	C17H34O5	UNPD156851	5.3965	5.3965	Unknown	3	32	317.233	[M-H]-	318.241	0.0006477	3.079	Long-chain fatty acids	IPKYPTDOBPLFJT-REIYMHPCNA-N	O=C(O)CCCCCCCC(O)C(O)CCCCCCCO	UNPD=UNPD156851,COCONUT=CNP0156107	0.000764337	0.000751051	0.000545257	0.000362018	0.000378542	0.00036452	0	0	0	0.00118334	0.00184497	0.0018529	0.00048474	0.000519321	0.000519373	0.000542225	0.000792458	0.000752713	0.00079253	0	0	0.00084378	0
29	neg_1312	Simple ID		1	neg	1312	9.385	318.146	[M-H]-	generic	C16H21N3O4	2-[(4-carbamoylpiperidine-1-carbonyl)amino]-3-phenylpropanoic acid	6.4504	6.4504	Unknown	3	30	318.146	[M-H]-	319.153	0.0001297	3.871	Phenylalanine and derivatives	TUHFIDPKFCDTJS-UHFFFAOYSA-N	O=C(O)C(NC(=O)N1CCC(C(=O)N)CC1)CC=2C=CC=CC2	COCONUT=CNP0183643	0.00047593	0.000529275	0.000513718	0.000250393	0.000246587	0	0.000683837	0.000524997	0	0.000737928	0.00050881	0	0.000409428	0	0	0	0	0	0	0	0	0	0
30	neg_1313	Simple ID		1	neg	1313	9.457	318.146	[M-H]-	generic	C16H21N3O4	3-[(5-carboxylato-1,2-oxazol-3-yl)methyl]-4-{[methyl(prop-2-yn-1-yl)carbamoyl]methyl}piperidin-1-ium	6.2062	6.2062	Unknown	3	31	318.146	[M-H]-	319.153	2.97e-05	3.984	Delta amino acids and derivatives	FTOPGYKKIKMMPG-UHFFFAOYSA-N	O=C(O)C=1ON=C(C1)CC2CNCCC2CC(=O)N(C)CC#C	COCONUT=CNP0190715	0	0	0	0	0	0	0	0	0.000553964	0	0	0	0	0.00039129	0.000400105	0.000410866	0	0	0	0.000653264	0.000620674	0.000768711	0
31	neg_132	Simple ID		1	neg	132	20.126	168.103	[M-H]-	generic	C9H15NO2	Homoarecoline	4.5115	4.5115	Unknown	3	15	168.103	[M-H]-	169.11	-0.0004977	2.807	Alkaloids and derivatives	UNARQANIGOBIHM-UHFFFAOYSA-N	O=C(OCC)C1=CCCN(C)C1	HMDB=HMDB0038321,KNApSAcK=C00044165,FooDB=FDB017654,UNPD=UNPD129433,BLEXP=BLEXPDB00000034167,COCONUT=CNP0186391	0	0	0	0.00308698	0.00424588	0.00461931	0	0	0	0	0	0	0.000944095	0.000935505	0.00100963	0.00099604	0	0	0	0	0	0	0
32	neg_1327	Simple ID		1	neg	1327	22.073	321.207	[M-H]-	generic	C19H30O4	Decahydro-alpha,4a-dimethyl-8-methylene-7-(2-methyl-1-oxopropoxy)-2-naphthaleneacetic acid	6.3357	6.3357	Unknown	3	25	321.207	[M-H]-	322.214	-6.7e-05	3.572	Eudesmane, isoeudesmane or cycloeudesmane sesquiterpenoids	QXCPZBACALUQKU-UHFFFAOYNA-N	O=C(O)C(C)C1CCC2(C)CCC(OC(=O)C(C)C)C(=C)C2C1	KNApSAcK=C00012849,UNPD=UNPD150287,COCONUT=CNP0178906	0.0016331	0.00144999	0.00159833	0	0	0	0.00187455	0.00219906	0.00240258	0	0	0	0.000643186	0.000701163	0.000701911	0.000703119	0	0	0	0	0	0	0
33	neg_1342	Simple ID		1	neg	1342	1.006	323.065	[M-H]-	generic	C10H17N2O8P	5,6-dihydrothymidine 5'-monophosphate	3.9563	3.9563	Unknown	3	22	323.065	[M-H]-	324.072	7.57e-05	2.479	Pyrimidine 2'-deoxyribonucleoside monophosphates	PGRQANKWVMVANW-UNYLCCJPSA-N	O=C1NC(=O)C(C)CN1C2OC(COP(=O)(O)O)C(O)C2	ChEBI=CHEBI:132172,COCONUT=CNP0229904	0.000402851	0.000477457	0.000460147	0	0	0	0	0	0.000444759	0	0	0	0	0.000349136	0.000334143	0.000356578	0	0	0	0	0	0	0
34	neg_1362	Simple ID		1	neg	1362	8.359	324.093	[M-H]-	generic	C11H19NO10	N-Glycolylneuraminic acid	7.2558	7.2558	Unknown	3	44	324.093	[M-H]-	325.101	0.0003194	3.927	Neuraminic acids	FDJKUWYYUZCUJX-PATFUBAINA-N	O=C(O)C1(O)OC(C(O)C(O)CO)C(NC(=O)CO)C(O)C1	HMDB=HMDB0000833;HMDB0062502,ChEBI=CHEBI:29025;CHEBI:62084;CHEBI:62269,FooDB=FDB001165,BMDB=BMDB00833,PubChem=16738688;440001,UNPD=UNPD37225;UNPD41769,BLEXP=BLEXPDB00000123802,COCONUT=CNP0172253	0.00101989	0.00110625	0.00121189	0	0	0	0.00121578	0.00120634	0.00126534	0.00084599	0.0006934	0.000723471	0.000411611	0.000450035	0.000490278	0.000441038	0	0	0	0	0	0	0
35	neg_1365	Unknown compound		1	neg	1365	23.749	324.133	[M-H]-																		0.000775714	0.000930709	0.000863619	0	0	0	0.000447488	0.00060226	0.000735159	0.000429294	0.000497235	0	0.000389644	0.000410677	0.000428675	0.000413748	0.000313495	0.000195529	0.000331851	0.000601052	0	0.000853246	0
36	neg_1368	Simple ID		1	neg	1368	13.586	324.156	[M-H]-	generic	C15H23N3O5	4-{8'-acetyl-hexahydro-1'H-spiro[azetidine-3,6'-pyrazino[2,1-c][1,4]oxazin]-1-yl}-4-oxobutanoic acid	6.6536	6.6536	Unknown	3	30	324.156	[M-H]-	325.164	0.0007944	3.529	Heterocyclic fatty acids	OPYQRUYXENNLRV-UHFFFAOYSA-N	O=C(O)CCC(=O)N1CC2(N3CCOCC3CN(C(=O)C)C2)C1	COCONUT=CNP0044564	0.000910314	0.000957933	0.000974107	0	0	0	0	0	0	0.000964363	0.000862629	0	0.000538565	0	0	0	0	0	0	0.00091889	0.000823406	0	0
37	neg_766	Simple ID	Other possible annotated peaks for this cluster.	4	neg	766	19.549	272.186	[M-H]-	generic	C14H27NO4	Heptanoylcarnitine	5.8083	5.8083	Unknown	3	31	272.185	[M-H]-	273.194	0.0012319	3.508	Acyl carnitines	VDPCTFWULDLKHT-UHFFFAOYNA-N	O=C([O-])CC(OC(=O)CCCCCC)C[N+](C)(C)C	HMDB=HMDB0013238,ChEBI=CHEBI:74303,FooDB=FDB029350,LipidMAPS=LMFA07070068,COCONUT=CNP0342488	0	0	0	0.0071148	0.006879	0.00744673	0	0	0	0	0	0	0.00181041	0.00191773	0.00192125	0.00191968	0.000241222	0.000229795	0.000232856	0	0	0	0
38	neg_1393	Unknown compound		1	neg	1393	12.725	326.17	[M-H]-																		0	0	0	0	0	0	0.0011078	0.000766377	0.000801622	0	0	0.00113851	0.000466229	0	0	0.000432821	0.000270461	0.000217981	0.000241444	0	0.000722054	0	0
39	neg_1404	Simple ID		1	neg	1404	22.699	326.233	[M-H]-	generic	C18H33NO4	(9E)-9-nitrooctadecenoic Acid	7.1684	7.1684	Unknown	3	28	326.233	[M-H]-	327.241	0.0008821	4.108	Long-chain fatty acids	CQOAKBVRRVHWKV-SAPNQHFASA-N	O=C(O)CCCCCCCC(=CCCCCCCCC)N(=O)=O	HMDB=HMDB0062738,ChEBI=CHEBI:86329,LipidMAPS=LMFA01120004,BLEXP=BLEXPDB00011645581,COCONUT=CNP0098602	0	0	0	0.00190615	0.00254831	0.00254822	0	0	0	0	0	0	0.000508916	0.000554802	0.000581693	0.000559066	0	0	0	0	0	0	0
40	neg_1411	Unknown compound		1	neg	1411	21.622	327.216	[M-H]-																		0.00312979	0.00332714	0.00323108	0.000452007	0.000437922	0.000508957	0.00163124	0.0025562	0.00218562	0.000798732	0.00105861	0.0012355	0.00135698	0.00146741	0.00150607	0.00150361	0.0014904	0.00106692	0.00145955	0.00146313	0.00126934	0.00231546	0
41	neg_1420	Simple ID		1	neg	1420	10.026	328.152	[M-H]-	generic	C14H23N3O6	Valclavam	6.7835	6.7835	Unknown	3	36	328.152	[M-H]-	329.159	-0.000591	3.659	Dipeptides	YCGXMNQNHBKSKZ-YNWZBRBLSA-N	O=C(O)C(NC(=O)C(N)C(C)C)C(O)CC1OC2N(C(=O)C2)C1	ChEBI=CHEBI:9920,PubChem=56928070,COCONUT=CNP0080762	0.000803564	0.00105954	0.000980571	0	0	0	0.00235683	0.00144415	0.00146996	0.000647815	0	0.00128548	0	0.00070769	0.000739404	0.000697548	0.000512676	0.000474208	0.000381928	0	0.00139147	0	0
42	neg_1424	Simple ID		1	neg	1424	11.285	328.188	[M-H]-	generic	C15H27N3O5	UNPD106851	5.8212	5.8212	Unknown	3	43	328.188	[M-H]-	329.195	-5.5e-06	3.257	Aminocyclitols and derivatives	OSHGHQXTURHSOO-NLNACQGBNA-N	OC1C(OC)C(NC)C(O)C(OC2OC3C(=NC2CC3)C)C1N	UNPD=UNPD106851,COCONUT=CNP0230406	0.000649137	0.000726518	0.000715512	0	0	0	0.00107831	0.000927636	0.000961765	0.000916924	0.000768306	0.000987	0.000576773	0.000525158	0.000538208	0.000567969	0.000349599	0.000304268	0.000281854	0.000991458	0.000978634	0.000991401	0
43	neg_1432	Simple ID		1	neg	1432	26.241	328.249	[M-H]-	generic	C18H35NO4	4,8 Dimethylnonanoyl carnitine	4.9746	4.9746	Unknown	3	23	328.249	[M-H]-	329.257	0.0005321	3.184	Acyl carnitines	DDTDJDZHDFMZED-UHFFFAOYNA-N	O=C([O-])CC(OC(=O)CCC(C)CCCC(C)C)C[N+](C)(C)C	HMDB=HMDB0006202,ChEBI=CHEBI:63874;CHEBI:84654,SMPDB=PW_C002659,FooDB=FDB023834,BMDB=BMDB06202,LipidMAPS=LMFA07070046,PubChem=53477801,BLEXP=BLEXPDB00053477801,COCONUT=CNP0182957	0	0	0	0.000398078	0.000387175	0.000550611	0	0.00149698	0.000444558	0	0.000530449	0.000594575	0.000353423	0.000380273	0.000374064	0.000373824	0	0.000265845	0.000231054	0	0	0	0
44	neg_1455	Simple ID		1	neg	1455	14.084	332.071	[M-H]-	generic	C15H15N3O4S	N-[2-[(5-methoxy-6-oxo-1-cyclohexa-2,4-dienylidene)methylhydrazo]-2-oxoethyl]-2-thiophenecarboxamide	4.7936	4.7936	Unknown	3	21	332.071	[M-H]-	333.078	0.0004505	3.43	N-acyl-alpha amino acids and derivatives	WZGZTJILVAIMJJ-UHFFFAOYSA-N	O=C(NCC(=O)NNC=C1C=CC=C(OC)C1=O)C=2SC=CC2	ChEBI=CHEBI:119898	0	0	0	0	0	0	0	0	0	0	0	0	0.000367745	0.000317076	0.000293043	0.00032118	0	0	0	0	0	0	0.0011628
45	neg_146	Simple ID	Other possible annotated peaks for this cluster.	3	neg	146	21.372	172.098	[M-H]-	generic	C8H15NO3	N-Acetylisoleucine	7.834	7.834	Unknown	3	23	172.098	[M-H]-	173.105	0.0001169	4.408	Isoleucine and derivatives	JDTWZSUNGHMMJM-UHFFFAOYNA-N	O=C(NC(C(=O)O)C(C)CC)C	HMDB=HMDB0061684,ChEBI=CHEBI:21555;CHEBI:84056;CHEBI:133735,Feces=HMDB0061684,UNPD=UNPD174834;UNPD20551;UNPD75628,BLEXP=BLEXPDB00000306109,COCONUT=CNP0273094	0	0	0	0.00857153	0.00674481	0.00640351	0	0	0	0	0	0	0.00191827	0.00209139	0.00209622	0.002075	0	0	0	0	0	0	0
46	neg_1465	Simple ID		1	neg	1465	11.592	333.147	[M-H]-	generic	C14H26N2O5S	2-[[2-ammonio-3-[[2-hydroxy-1-(2-ketoethyl)heptyl]thio]propanoyl]amino]acetate	6.2302	6.2302	Unknown	3	29	333.147	[M-H]-	334.156	0.0015665	3.746	Dipeptides	LQTWZQSULMRBEE-UHFFFAOYSA-N	O=CCC(SCC(C(=O)NCC(=O)[O-])[NH3+])C(O)CCCCC	PubChem=90659346,PlantCyc=CPD-14705,COCONUT=CNP0211357	0	0	0	0	0	0	0	0	0	0.0046479	0.00102188	0.0021528	0.000612304	0.000486717	0.000473942	0.000455524	0.00031903	0.000275674	0.000230233	0.00301549	0.0118208	0.0008815	0
47	neg_1478	Simple ID		1	neg	1478	0.992	335.091	[M-H]-	generic	C15H17ClN4O3	2-{[(2-chlorophenyl)methyl]amino}-4-(1H-1,2,4-triazol-1-yl)-6,8-dioxabicyclo[3.2.1]octan-3-ol	4.6051	4.6051	Unknown	3	19	335.091	[M-H]-	336.099	0.0005416	2.774	Phenylmethylamines	AZUKFLAGZQXSCU-UHFFFAOYSA-N	ClC=1C=CC=CC1CNC2C(O)C(N3N=CN=C3)C4OCC2O4	COCONUT=CNP0006275	0.000492399	0.0005209	0.000506241	0	0	0.000225148	0	0.00052557	0.00062488	0	0	0.000526236	0.000414729	0.000477099	0.000486578	0.000479816	0.000191478	0.000173575	0.000240576	0	0	0.000535152	0
48	neg_1488	Simple ID		1	neg	1488	13.294	336.156	[M-H]-	generic	C16H23N3O5	methyl 2-{1-cyclobutyl-7'-hydroxy-1',3'-dioxo-hexahydro-1'H-spiro[azetidine-3,4'-pyrrolo[1,2-a]pyrazin]-2'-yl}acetate	6.1552	6.1552	Unknown	3	45	336.156	[M-H]-	337.164	9.44e-05	3.649	Alpha amino acid esters	ZGRGLZVMMSPPPF-UHFFFAOYSA-N	O=C(OC)CN1C(=O)C2N(CC(O)C2)C3(C1=O)CN(C3)C4CCC4	COCONUT=CNP0012892	0.00130221	0.00136415	0.00133715	0.000279411	0	0	0.0010436	0.000874088	0.000854177	0.00131739	0.00117709	0.00163729	0.000649421	0.000514688	0.000536333	0.000567037	0.000427855	0.000257917	0.000381281	0.00140965	0.00143645	0.000944056	0
49	neg_1276	Simple ID		2	neg	1276	22.789	314.233	[M-H]-	generic	C17H33NO4	Decanoylcarnitine	6.186	6.186	Unknown	3	28	314.233	[M-H]-	315.241	0.0011821	3.824	Acyl carnitines	LZOSYCMHQXPBFU-UHFFFAOYNA-N	O=C([O-])CC(OC(=O)CCCCCCCCC)C[N+](C)(C)C	HMDB=HMDB0000651;HMDB0062631,ChEBI=CHEBI:28717;CHEBI:68830,FooDB=FDB022162,BMDB=BMDB00651,LipidMAPS=LMFA07070006;LMFA07070059,Urine=HMDB0000651,Feces=HMDB0000651,Serum=HMDB0000651,BLEXP=BLEXPDB00010245190,COCONUT=CNP0346664	0	0	0	0.0199187	0.0187544	0.0180521	0	0	0	0	0	0	0.00478556	0.00514168	0.00521798	0.00521847	0	0	0	0	0	0	0
50	neg_1503	Simple ID		1	neg	1503	15.097	338.172	[M-H]-	generic	C16H25N3O5	CNP0435475	5.2633	5.2633	Unknown	3	43	338.172	[M-H]-	339.179	0.0003444	2.967	Piperazinopiperidines	JLSCOROTSAXUAL-UHFFFAOYSA-N	O=C(O)CCC(=O)NC1CCN2C(=O)C(NC(=O)C2C1)CC(C)C	COCONUT=CNP0435475	0.000517343	0.000513559	0.000521302	0	0.000241322	0	0.000685165	0.000627054	0.000642933	0.000490991	0.000489409	0	0	0	0.00038756	0	0.00023489	0	0	0	0.000471671	0.000685361	0
51	neg_1526	Simple ID		1	neg	1526	8.69	340.125	[M-H]-	generic	C12H23NO10	6-(alpha-D-Glucosaminyl)-1D-myo-inositol	5.6147	5.6147	Unknown	3	25	340.125	[M-H]-	341.132	-0.0005805	3.157	Aminocyclitol glycosides	HEPUIGACZYVUCD-YZRQSVRMSA-N	OCC1OC(OC2C(O)C(O)C(O)C(O)C2O)C(N)C(O)C1O	HMDB=HMDB0011668,KNApSAcK=C00018315,ChEBI=CHEBI:44230;CHEBI:52283;CHEBI:58700;CHEBI:58886,DrugBank=DB03779,FooDB=FDB028357,BMDB=BMDB11668,PubChem=46878468;195863;577,UNPD=UNPD190987,NPA=NPA021039,COCONUT=CNP0114730	0	0	0	0.000315252	0.000260822	0	0	0	0	0.000830945	0.00053368	0.000489455	0	0.0003238	0.000318131	0.000326057	0.000378228	0.00031446	0.000343024	0	0	0	0
52	neg_154	Simple ID		1	neg	154	12.58	174.056	[M-H]-	generic	C10H9NO2	Indoleacetic acid	7.513	7.513	Unknown	3	19	174.056	[M-H]-	175.063	0.0002521	4.196	Indole-3-acetic acid derivatives	SEOVTRFCIGRIMH-UHFFFAOYSA-N	O=C(O)CC1=CNC=2C=CC=CC21	HMDB=HMDB0000197,KNApSAcK=C00000100,ChEBI=CHEBI:16411;CHEBI:30854,DrugBank=DB07950,SMPDB=PW_C000128,YMDB=YMDB00576,T3DB=T3D4152,FooDB=FDB000933;FDB003573;FDB004267;FDB030920,Urine=HMDB0000197,Saliva=HMDB0000197,Feces=HMDB0000197,CSF=HMDB0000197,Serum=HMDB0000197,PubChem=802;801,PlantCyc=INDOLE_ACETATE_AUXIN,UNPD=UNPD124667,BLEXP=BLEXPDB00000000802,COCONUT=CNP0284198	0.00307721	0.0036038	0.00377856	0.000499182	0.000385464	0	0.00846122	0.0060141	0.00596369	0.00386948	0.00214872	0.00298371	0.0011841	0.0010088	0.00102311	0.00102582	0.000325491	0	0.000320056	0.00179906	0.00176717	0.00158066	0.00063172
53	neg_1561	Simple ID		1	neg	1561	27.048	342.263	[M-H]-	generic	C19H37NO4	Dodecanoylcarnitine	4.545	4.545	Unknown	3	21	342.263	[M-H]-	343.272	0.0015822	2.749	Acyl carnitines	FUJLYHJROOYKRA-AGDOHHJYNA-N	O=C([O-])CC(OC(=O)CCCCCCCCCCC)C[N+](C)(C)C	HMDB=HMDB0002250,ChEBI=CHEBI:73054;CHEBI:77086,YMDB=YMDB01529,FooDB=FDB022928,BMDB=BMDB02250,LipidMAPS=LMFA07070062;LMFA07070090,Urine=HMDB0002250,Serum=HMDB0002250,BLEXP=BLEXPDB00000168381;BLEXPDB00000168382;BLEXPDB00000177510,COCONUT=CNP0346733	0.000469003	0.000549315	0.000318235	0.00202936	0.00209066	0.0027696	0.00110911	0.00419927	0.00126131	0.00147889	0.00702673	0.00717989	0.0016872	0.00175325	0.00176402	0.00173113	0.000762706	0.00134235	0.0010678	0.00178929	0.000605672	0.000969437	0
54	neg_1571	Unknown compound		1	neg	1571	11.491	344.159	[M-H]-																		0.000845024	0.000845903	0.000879462	0.000255465	0.000196645	0.000210195	0.0006733	0.000509278	0	0	0.00035163	0	0.00032918	0	0.000315684	0	0	0	0	0	0	0.000365441	0
55	neg_1593	Simple ID		1	neg	1593	20.6	347.186	[M-H]-	generic	C20H28O5	Gibberellin A53	7.6414	7.6414	Unknown	3	74	347.186	[M-H]-	348.194	0.0001975	4.176	C20-gibberellin 6-carboxylic acids	CZEMYYICWZPENF-UHFFFAOYNA-N	O=C(O)C1C2C(C(=O)O)(C)CCCC2(C)C3CCC4(O)C(=C)CC13C4	HMDB=HMDB0036895,KNApSAcK=C00000053,ChEBI=CHEBI:27433,FooDB=FDB015855,LipidMAPS=LMPR0104170007,PubChem=25203620;440914,PlantCyc=CPD-695,UNPD=UNPD182536,COCONUT=CNP0179607	0.00464375	0.00386179	0.00373787	0	0	0	0.00219242	0.002631	0.00286198	0	0	0	0.000998287	0.00106696	0.00107419	0.00108843	0	0	0	0	0	0	0
56	neg_1594	Simple ID		1	neg	1594	20.885	347.222	[M-H]-	generic	C21H32O4	9alpha-(3-Methyl-2E-pentenoyloxy)-4S-hydroxy-10(14)-oplopen-3-one	7.3126	7.3126	Unknown	3	52	347.222	[M-H]-	348.23	0.0005831	4.067	Sesquiterpenoids	AIZCSTFUIXPHFD-XYOKQWHBNA-N	O=C(OC1C(=C)C2CC(=O)C(C(O)C)C2C(C1)C(C)C)C=C(C)CC	HMDB=HMDB0040954,FooDB=FDB020802,UNPD=UNPD129063,COCONUT=CNP0324475	0	0	0.00204532	0	0	0	0.00216161	0.00250044	0	0	0	0	0.000673147	0.000733429	0.000747577	0.000718128	0	0	0	0	0	0	0
57	neg_160	Simple ID		1	neg	160	17.501	175.076	[M-H]-	generic	C11H12O2	Cinnamyl acetate	5.0444	5.0444	Unknown	3	29	175.076	[M-H]-	176.084	0.0005532	2.9	Styrenes	WJSDHUCWMSHDCR-YVMONPNESA-N	O=C(OCC=CC=1C=CC=CC1)C	HMDB=HMDB0029699,KNApSAcK=C00035072,ChEBI=CHEBI:31402,FooDB=FDB000889;FDB004886,UNPD=UNPD116800;UNPD79760;UNPD209825,COCONUT=CNP0207222	0	0	0	0	0	0	0.000658606	0.0004659	0.000412026	0.00280203	0.00536769	0.00694933	0.000815725	0.000770809	0.000797242	0.000806054	0	0	0	0.00916072	0.00351426	0.00111635	0
58	neg_1602	Simple ID	Other possible annotated peaks for this cluster.	2	neg	1602	19.555	349.163	[M-H]-	generic	C15H22N6O4	7-(2-hydroxy-3-{[(morpholin-4-yl)methylidene]amino}propyl)-1,3-dimethyl-2,3,6,7-tetrahydro-1H-purine-2,6-dione	5.8535	5.8535	Unknown	3	31	349.163	[M-H]-	350.17	0.0003767	3.9	Xanthines	YBYLMWJFEFIGQR-UHFFFAOYSA-N	O=C1C2=C(N=CN2CC(O)CN=CN3CCOCC3)N(C(=O)N1C)C	COCONUT=CNP0010096	0.00119156	0.00106943	0.00118336	0	0	0	0.00189609	0.00158046	0.00165535	0	0	0	0.000726009	0.000699506	0.000723863	0.000701315	0	0	0	0	0	0	0
59	neg_1608	Simple ID		1	neg	1608	28.695	349.31	[M-H]-	generic	C23H42O2	UNPD204478	7.0785	7.0785	Unknown	3	27	349.31	[M-H]-	350.318	0.0009041	4.67	Very long-chain fatty acids	OGEMOELKNFXQBO-HZJYTTRNSA-N	O=C(O)CCCCCCCCCCCCC=CCC=CCCCCC	UNPD=UNPD204478,COCONUT=CNP0220629	0	0	0	0.00153015	0.00176456	0.00227874	0	0	0	0	0	0	0.000347716	0.000366397	0.000358872	0.000334932	0	0	0	0	0	0	0
60	neg_1609	Simple ID		1	neg	1609	31.414	349.31	[M-H]-	generic	C23H42O2	UNPD204478	6.8098	6.8098	Unknown	3	14	349.31	[M-H]-	350.318	0.0009041	3.668	Very long-chain fatty acids	OGEMOELKNFXQBO-HZJYTTRNSA-N	O=C(O)CCCCCCCCCCCCC=CCC=CCCCCC	UNPD=UNPD204478,COCONUT=CNP0220629	0	0	0	0.00157617	0.00184282	0.00163251	0	0	0	0	0	0	0.000300268	0.000344372	0.000337991	0.000320356	0	0	0	0	0	0	0
61	neg_1629	Simple ID		1	neg	1629	8.957	354.087	[M-H]-	generic	C12H21NO9S	[(1R,2S,6S,9R,11R)-11-(hydroxymethyl)-4,4,11-trimethyl-3,5,7,10,12-pentaoxatricyclo[7.3.0.02,6]dodecan-6-yl]methyl sulfamate	4.7521	4.7521	Unknown	3	40	354.087	[M-H]-	355.094	-0.0008742	3.12	Dioxolopyrans	RWNDWLAEFHRSEG-VZSYODPGSA-N	O=S(=O)(OCC12OCC3OC(OC3C2OC(O1)(C)C)(C)CO)N	BLEXP=BLEXPDB00029982168,COCONUT=CNP0347441	0.000576668	0.000748124	0.000648417	0	0	0	0.00345368	0.00242461	0.00281056	0	0	0	0.000747072	0.000820381	0.000851343	0.000782519	0	0	0	0.000434481	0.00055389	0.000631744	0
62	neg_1650	Unknown compound		1	neg	1650	13.235	356.123	[M-H]-																		0.00331897	0.00325449	0.00342391	0	0	0	0.00171889	0.00125108	0.00133985	0.0037945	0.00270396	0.00308264	0.00118624	0.00091523	0.000922079	0.000965012	0.000478613	0.000314697	0.000422559	0.00179435	0.00194711	0.00152661	0
63	neg_1653	Simple ID		1	neg	1653	13.999	356.183	[M-H]-	generic	C16H27N3O6	UNPD1172	6.5652	6.5652	Unknown	3	34	356.183	[M-H]-	357.19	-0.0004909	3.679	Dipeptides	ZFCGPWGFGUDLHO-YGXCJBSINA-N	O=C(O)C(NC(=O)C(N)C)CCCNC(=O)C1OC(=O)C1C(C)CC	UNPD=UNPD1172,NPA=NPA010752,COCONUT=CNP0219003	0.0005686	0.000521074	0.000454887	0	0	0	0	0	0	0.000597758	0.000511064	0.00124669	0.000414227	0.000431918	0.000433915	0.00042585	0	0	0	0.000931866	0.00114226	0.00140907	0
64	neg_1564	Simple ID	Other possible annotated peaks for this cluster.	2	neg	1564	15.166	343.175	[M-H]-	generic	C17H28O7	UNPD205010	6.5753	6.5753	Unknown	3	33	343.175	[M-H]-	344.184	0.0010268	3.486	Dicarboxylic acids and derivatives	AXMYBKVKZPWGTH-QIYJODDENA-N	O=C(OCCCCCC1OC(=O)C(C)C(O)C(O)C2OC1CC2)C	UNPD=UNPD205010,NPA=NPA003291,COCONUT=CNP0131262	0.003786	0.00331038	0.00330978	0	0	0	0.00240841	0.00224462	0.00232189	0	0	0	0.00134762	0.00139574	0.00143941	0.001441	0	0	0	0	0	0	0
65	neg_1663	Simple ID		1	neg	1663	0.971	357.079	[M-H]-	generic	C10H18N2O12	(2-oxo-2-{[3,4,5-trihydroxy-6-({[2-(hydroxy-oxo-??-azanyl)acetyl]oxy}methyl)oxan-2-yl]oxy}ethyl)azinic acid	4.6061	4.6061	Unknown	3	50	357.079	[M-H]-	358.086	-0.0004024	2.927	Alpha amino acid esters	NRNQHVGDEXDDJE-UHFFFAOYSA-N	O=C(OCC1OC(OC(=O)CN(=O)O)C(O)C(O)C1O)CN(=O)O	COCONUT=CNP0417237	0.00120387	0.00163365	0.00212108	0.00102037	0.000792798	0.000362205	0.00194945	0.00784766	0.00713638	0	0.00160289	0.0064308	0.00175176	0.00208671	0.00213967	0.00225437	0.00246643	0.00125924	0.00221684	0.00325202	0	0.00216421	0
66	neg_1665	Simple ID		1	neg	1665	6.278	357.079	[M-H]-	generic	C10H18N2O12	(2-oxo-2-{[3,4,5-trihydroxy-6-({[2-(hydroxy-oxo-??-azanyl)acetyl]oxy}methyl)oxan-2-yl]oxy}ethyl)azinic acid	4.6355	4.6355	Unknown	3	47	357.079	[M-H]-	358.086	-0.0004024	2.989	Alpha amino acid esters	NRNQHVGDEXDDJE-UHFFFAOYSA-N	O=C(OCC1OC(OC(=O)CN(=O)O)C(O)C(O)C1O)CN(=O)O	COCONUT=CNP0417237	0.00135378	0.00169798	0.00154055	0.000802539	0	0	0	0	0	0.0012313	0.000881583	0.00302537	0.00148258	0	0	0	0	0	0	0	0	0	0
67	neg_167	Simple ID		1	neg	167	13.152	179.072	[M-H]-	generic	C10H12O3	Coniferyl alcohol	6.7969	6.7969	Unknown	3	25	179.072	[M-H]-	180.079	-0.0002322	3.833	Methoxyphenols	JMFRWRFFLBVWSI-NSCUHMNNSA-N	OC1=CC=C(C=CCO)C=C1OC	HMDB=HMDB0012915,KNApSAcK=C00000614;C00043990,ChEBI=CHEBI:17745,FooDB=FDB015496,NANPDB=NANPDB_6781,PubChem=1549095,PlantCyc=CONIFERYL-ALCOHOL,UNPD=UNPD133185;UNPD175520;UNPD211983,BLEXP=BLEXPDB00000009983,NPA=NPA019705,COCONUT=CNP0239078	0.00289223	0.00331066	0.00344768	0.00030547	0	0	0.00736341	0.00492828	0.00440748	0.000425145	0	0	0.00152993	0.00121773	0.00119966	0.0013182	0.00102753	0.00105013	0.000863937	0.00114781	0	0.000736386	0
68	neg_1685	Unknown compound		1	neg	1685	13.235	359.085	[M-H]-																		0.000372728	0.000395253	0.000386103	0.00131157	0.000757756	0	0.000643948	0.000839753	0.000463893	0.00109029	0.00167371	0.0021849	0.00110172	0.000698435	0.000710408	0.000734909	0.000708004	0.000243626	0.000372066	0.00418607	0	0.00157832	0
69	neg_1687	Simple ID		1	neg	1687	15.621	359.125	[M-H]-	generic	C18H20N2O6	3-Methoxytyramine BX	7.2486	7.2486	Unknown	3	29	359.125	[M-H]-	360.132	-0.0005401	3.991	Methoxyphenols	SBHOSQZNRDXQAX-JBACSLPBNA-N	O=C(O)C1=CC(=CC=NCCC2=CC=C(O)C(OC)=C2)CC(N1)C(=O)O	KNApSAcK=C00036555,ChEBI=CHEBI:81319,PlantCyc=CPD-8757,UNPD=UNPD183779,COCONUT=CNP0189149	0.00047192	0.000573929	0.000437588	0	0	0	0.000567092	0	0	0.000992494	0.000624975	0.000655826	0.00034037	0.000332182	0.000346791	0.000362307	0.000357335	0.000232236	0.000301207	0.000822696	0.00122432	0.00197881	0
70	neg_1700	Simple ID		1	neg	1700	13.236	361.082	[M-H]-	generic	C19H23BrO2	Methyl 18-bromooctadec-17-en-5,7,15-triynoate	4.2053	4.2053	Unknown	3	23	361.082	[M-H]-	362.088	-0.0006344	2.728	Fatty acid methyl esters	MVCJGXSDCQYJLT-FBMGVBCBSA-N	O=C(OC)CCCC#CC#CCCCCCCC#CC=CBr	LipidMAPS=LMFA01090118;LMFA01090123,UNPD=UNPD16502;UNPD187335,COCONUT=CNP0284091	0	0	0	0.000533984	0	0.000436229	0	0	0	0.000448191	0	0	0.0004532	0.000280286	0.000274771	0.000296634	0.00028056	0	0	0	0	0	0
71	neg_1702	Simple ID		1	neg	1702	15.532	361.149	[M-H]-	generic	C16H26O9	[3R-(3alpha,3aalpha,4beta,5alpha,6aalpha)]-4-[(beta-D-Gulucopyranosyloxy)methyl]hexsahydro-3-(hydroxymethyl)-5-methyl-2H-cyclopenta[b]furan-2-one	5.8729	5.8729	Unknown	3	28	361.149	[M-H]-	362.158	0.001206	3.397	Terpene glycosides	SDKYVWCCNKBOEY-OQWSPWSANA-N	O=C1OC2CC(C)C(COC3OC(CO)C(O)C(O)C3O)C2C1CO	KNApSAcK=C00010560,UNPD=UNPD55268,COCONUT=CNP0191495	0.000480458	0.000351933	0.000364126	0	0	0	0.00137574	0.000949314	0.00090962	0.000446827	0.000953899	0.00161673	0.000580779	0.000478581	0.000495839	0.000503034	0.000484952	0.000430922	0.000574758	0.00084997	0.000844371	0.000354388	0
72	neg_1716	Simple ID		1	neg	1716	11.833	363.16	[M-H]-	generic	C23H24O4	UNPD229563	5.1482	5.1482	Unknown	3	29	363.16	[M-H]-	364.167	0.0001828	3.198	1-hydroxy-4-unsubstituted benzenoids	INWBNVWKWLOEKI-BJUKTHHLSA-N	O=C1OC(=CC2=CC=C(O)C=C2)C(C)C1C3=CC=C(C(O)=C3)CC=C(C)C	UNPD=UNPD229563,NPA=NPA001479,COCONUT=CNP0116795	0	0	0	0	0	0	0	0.000391778	0	0.00123249	0.000769636	0.00371412	0.00079936	0.000714128	0.000709036	0.000722518	0	0	0	0.0032299	0.00622912	0	0
73	neg_1730	Simple ID		1	neg	1730	11.341	367.1	[M-H]-	generic	C17H16N6O2S	N,N-dimethyl-4-[3-(4-nitrophenyl)-5H,6H-[1,2,4]triazolo[3,4-b][1,3,4]thiadiazol-6-yl]aniline	4.0516	4.0516	Unknown	3	40	367.1	[M-H]-	368.106	-0.0015317	2.688	Phenyl-1,2,4-triazoles	ACAQMIOEGSFJBR-UHFFFAOYSA-N	O=[N+]([O-])C=1C=CC(=CC1)C2=NN=C3SC(NN32)C4=CC=C(C=C4)N(C)C	COCONUT=CNP0263106	0	0.000295806	0.000310831	0.000625757	0.000474772	0.000626048	0.00107028	0.00127468	0.00107734	0.00061627	0.000559256	0.00113518	0.00078668	0.000705834	0.000724744	0.000746794	0.000392012	0.000325659	0.000288978	0.00109207	0.00188097	0.000570741	0
74	neg_174	Simple ID		1	neg	174	19.424	181.086	[M-H]-	generic	C10H14O3	UNPD2839	6.4427	6.4427	Unknown	3	17	181.086	[M-H]-	182.094	0.0006179	3.826	Branched fatty acids	AAFQBGIWLGZYHH-JLDDOWRYNA-N	O=C(O)C(CC1=CCCC1=O)CC	UNPD=UNPD2839,NPA=NPA004849,COCONUT=CNP0365952	0.000735322	0.000637359	0.000622072	0.00369606	0.0026457	0.00248868	0.000945701	0.000761225	0.000747132	0.00112691	0.00127814	0.00168453	0.00114167	0.00114533	0.00113353	0.00116598	0.000704185	0.000503448	0.000739431	0.00202306	0.00151575	0.001003	0.00066004
75	neg_1749	Simple ID		1	neg	1749	13.109	370.177	[M+FA-H]-	generic	C19H23N3O2	Ergonovine	5.6625	5.6625	Unknown	3	26	370.176	[M+FA-H]-	325.179	0.0007295	3.258	Lysergamides	WVVSZNPYNCNODU-XTQGRXLLSA-N	O=C(NC(C)CO)C1C=C2C=3C=CC=C4NC=C(C43)CC2N(C)C1	HMDB=HMDB0015383,KNApSAcK=C00001722;C00011206,ChEBI=CHEBI:4822;CHEBI:91849,DrugBank=DB01253,T3DB=T3D3685,STOFF=STOFF_8248,Urine=HMDB0015383,Serum=HMDB0015383,UNPD=UNPD123009;UNPD131294;UNPD150456;UNPD50684;UNPD62657,BLEXP=BLEXPDB00000003250,NPA=NPA011882,COCONUT=CNP0176673	0.000933923	0.000914723	0.000908198	0.000302666	0.000257286	0.000237562	0	0	0	0.000919207	0.000884851	0.000959879	0.000463071	0.000434044	0.000425403	0.00043105	0.000297751	0.000233849	0.000287581	0.00101435	0.000642659	0.000888371	0
76	neg_1773	Simple ID		1	neg	1773	14.814	372.156	[M-H]-	generic	C19H23N3O5	3-butyl-6-hydroxy-5-{6-methyl-2H,5H,6H,7H,8H-[1,3]dioxolo[4,5-g]isoquinolin-5-yl}-1,2,3,4-tetrahydropyrimidine-2,4-dione	6.3464	6.3464	Unknown	3	41	372.156	[M-H]-	373.164	0.0008944	3.829	Tetrahydroisoquinolines	BIKQANKFFJVCMZ-UHFFFAOYSA-N	O=C1NC(O)=C(C(=O)N1CCCC)C2C3=CC=4OCOC4C=C3CCN2C	COCONUT=CNP0400985	0.000769074	0.000799383	0.000761571	0.000300093	0.000233669	0.000251077	0.00116027	0.00111768	0.00111737	0.000537137	0.000521266	0.000575947	0.000516134	0.000451002	0.00048675	0.000469972	0	0	0	0.000878862	0.000958411	0.000788671	0
77	neg_1781	Simple ID		1	neg	1781	22.079	373.202	[M-H]-	generic	C22H30O5	11beta,20-Dihydroxy-3-oxopregn-4-en-21-oic acid	7.1739	7.1739	Unknown	3	80	373.202	[M-H]-	374.209	-5.24e-05	4.311	20-oxosteroids	VUDYWBBYQWVFAG-GKLBWGGBSA-N	O=C(O)CC(=O)C1CCC2C3CCC4=CC(=O)CCC4(C)C3C(O)CC12C	HMDB=HMDB0011651,FooDB=FDB028342,BMDB=BMDB11651,LipidMAPS=LMST02030190,COCONUT=CNP0001918	0.00397362	0.00287985	0.00271522	0	0	0	0.00367503	0.00371317	0.00427324	0	0	0	0.00113398	0.00123232	0.00123336	0.00121122	0	0	0	0	0	0	0
78	neg_1786	Simple ID		1	neg	1786	16.188	374.173	[M-H]-	generic	C19H25N3O5	N-[(3,4-dihydroxy-5-{[(prop-2-yn-1-yl)carbamoyl]methyl}oxolan-2-yl)methyl]-4-(dimethylamino)benzamide	6.3191	6.3191	Unknown	3	40	374.173	[M-H]-	375.179	-0.0004556	3.743	C-glycosyl compounds	CYALSOMNSOHZHK-UHFFFAOYSA-N	O=C(NCC1OC(CC(=O)NCC#C)C(O)C1O)C2=CC=C(C=C2)N(C)C	COCONUT=CNP0066908	0.000576502	0.000556514	0.000496454	0	0	0.000285448	0	0	0.000512531	0	0	0	0	0.000485453	0.000506471	0.000502993	0	0.000235469	0	0.00110856	0.000792649	0.00136929	0
79	neg_179	Simple ID		1	neg	179	21.67	181.159	[M-H]-	generic	C12H22O	Geosmin	7.5371	7.5371	Unknown	3	28	181.159	[M-H]-	182.167	0.0004889	3.795	Tertiary alcohols	JLPUXFOGCDVKGO-UHFFFAOYNA-N	OC12CCCCC2(C)CCCC1C	HMDB=HMDB0036461,KNApSAcK=C00013224,ChEBI=CHEBI:46702;CHEBI:46705,YMDB=YMDB01699,FooDB=FDB015352,LipidMAPS=LMPR0103090008,PubChem=29746,UNPD=UNPD10899;UNPD24247,BLEXP=BLEXPDB00000029746,NPA=NPA009715,COCONUT=CNP0273442	0	0	0	0.00136232	0.00116767	0.00121175	0	0	0	0.00155867	0.00237646	0.00195928	0.000448483	0.000476769	0.00050576	0.000494681	0	0	0	0	0	0	0
80	neg_1799	Simple ID		1	neg	1799	21.591	377.232	[M-H]-	generic	C22H34O5	Dendronpholide E;(-)-Dendronpholide E;Sinulaflexiolide G;(-)-Sinulaflexiolide G	6.8743	6.8743	Unknown	3	42	377.232	[M-H]-	378.241	0.0015477	3.756	Cembrane diterpenoids	DDVQLQBZUYJIOQ-VCECLKNDNA-N	O=C(OCC)C(=C)C1CCC(O)(C(=O)CCC(=CCC=C(C)C(O)C1)C)C	KNApSAcK=C00038971,UNPD=UNPD15887;UNPD171961,COCONUT=CNP0288742	0	0	0	0	0	0	0	0	0	0	0	0	0.00146676	0.00162955	0.00160966	0.00163614	0.00818532	0.00920267	0.00903552	0	0	0	0
81	neg_180	Simple ID		1	neg	180	21.629	182.119	[M-H]-	generic	C10H17NO2	3alpha-Acetoxytropane;; Acetyltropine; O-Acetyltropine; Tropan-3a-ol acetate (ester); Tropine acetate (ester); Tropyl acetate; endo-3-Acetoxy-8-methyl-8-azabicyclo[3.2.1]octane	5.1532	5.1532	Unknown	3	26	182.119	[M-H]-	183.126	5.23e-05	3.138	Tropane alkaloids	MDIDMOWWLBGYPG-MYJAWHEDNA-N	O=C(OC1CC2N(C)C(CC2)C1)C	KNApSAcK=C00025551;C00025556,ChEBI=CHEBI:31167;CHEBI:31170,NANPDB=NANPDB_3722,PubChem=103008,UNPD=UNPD104936;UNPD195000,COCONUT=CNP0313035	0	0	0	0.0114289	0.0177183	0.0167129	0	0	0	0	0	0	0.00445153	0.00476401	0.00473721	0.00463873	0	0	0	0	0	0	0
82	neg_1803	Simple ID		1	neg	1803	8.955	379.161	[M-H]-	generic	C17H24N4O6	UNPD184500	6.5628	6.5628	Unknown	3	35	379.161	[M-H]-	380.17	0.001608	3.533	N-acyl-alpha amino acids and derivatives	WRZPMVMHSJTCJE-XXCBQWOANA-N	O=C(NC(C(=O)NC1C(=O)N(O)CCC1)CCCN)C=2C=CC=C(O)C2O	UNPD=UNPD184500,NPA=NPA014415,COCONUT=CNP0106359	0	0	0	0	0	0	0.0031066	0.00150826	0.00122578	0.000692177	0.000450147	0.00493604	0.00102778	0.00113595	0.00119375	0.00114179	0.00125712	0.00117914	0.000826401	0.00323214	0.00629063	0.0013872	0
83	neg_1827	Simple ID		1	neg	1827	1.014	383.114	[M-H]-	generic	C14H20N6O5S	S-Adenosylhomocysteine	6.2656	6.2656	Unknown	3	18	383.114	[M-H]-	384.122	0.0003123	3.409	5'-deoxy-5'-thionucleosides	ZJUKTBDSGOFHSH-WFMPWKQPSA-N	O=C(O)C(N)CCSCC1OC(N2C=NC=3C(=NC=NC32)N)C(O)C1O	HMDB=HMDB0000939,KNApSAcK=C00007230,ChEBI=CHEBI:16680;CHEBI:57856;CHEBI:67009,DrugBank=DB01752,SMPDB=PW_C000749,YMDB=YMDB00198,T3DB=T3D4455,FooDB=FDB022327;FDB031150,BMDB=BMDB00939,Urine=HMDB0000939,Feces=HMDB0000939,ECMDB=ECMDB00939,CSF=HMDB0000939,Serum=HMDB0000939,PubChem=25246222;439155,PlantCyc=ADENOSYL-HOMO-CYS,BLEXP=BLEXPDB00000439155,COCONUT=CNP0339419	0	0	0	0.000289599	0.00030006	0.000394382	0.000566294	0.000546061	0.000636511	0	0	0	0.000345535	0.000404562	0.000427122	0.000412024	0	0	0	0	0	0	0
84	neg_1835	Simple ID		1	neg	1835	34.009	383.188	[M-H]-	generic	C23H28O5	Phomoarcherin B	4.744	4.744	Unknown	3	38	383.188	[M-H]-	384.194	-0.0015025	2.706	Isoflavanols	YHFZNBXTQFHWGR-CZEKILCQNA-N	O=C1OCC2=C3OC4(C)CCC5C(C(=O)CCC5(C)C4CC3=C(O)C=C12)(C)C	ChEBI=CHEBI:67846,UNPD=UNPD200923,NPA=NPA018572,COCONUT=CNP0166567	0.000646394	0.000554297	0	0	0	0.000330066	0.000497298	0.000529041	0.000436252	0	0.000562468	0.000726327	0.000339141	0.000351332	0.000319954	0.000341704	0.000220919	0.00018041	0.000198759	0.00046535	0	0.000509393	0
85	neg_1867	Simple ID		1	neg	1867	24.857	387.253	[M-H]-	generic	C24H36O4	7alpha-hydroxy-3-oxochol-4-en-24-oic Acid	7.0303	7.0303	Unknown	3	27	387.253	[M-H]-	388.261	0.0006832	4.049	Monohydroxy bile acids, alcohols and derivatives	CFLVYJJIZHNITM-NLXMLWGDSA-N	O=C(O)CCC(C)C1CCC2C3C(O)CC4=CC(=O)CCC4(C)C3CCC12C	HMDB=HMDB0062744,ChEBI=CHEBI:87747;CHEBI:88109,LipidMAPS=LMST04010239,BLEXP=BLEXPDB00000193493,COCONUT=CNP0248566	0.00161564	0.00172783	0.0016853	0	0	0	0.000884081	0.00107748	0.00114358	0	0	0	0.000298913	0.000314428	0.000341389	0.000318609	0	0	0	0	0	0	0
86	neg_1875	Simple ID		1	neg	1875	11.187	389.109	[M-H]-	generic	C16H22O11	Monotropein	5.8363	5.8363	Unknown	3	37	389.109	[M-H]-	390.116	-6.49e-05	3.115	Iridoid O-glycosides	HPWWQPXTUDMRBI-UHFFFAOYNA-N	O=C(O)C1=COC(OC2OC(CO)C(O)C(O)C2O)C3C1C=CC3(O)CO	HMDB=HMDB0035608,KNApSAcK=C00003089,ChEBI=CHEBI:6988,FooDB=FDB014309,LipidMAPS=LMPR0102070012,UNPD=UNPD111643;UNPD133269;UNPD146052;UNPD151460;UNPD158961;UNPD96142,BLEXP=BLEXPDB00000073466,COCONUT=CNP0173700	0	0	0	0	0	0	0	0	0	0	0	0	0.00063149	0.000576919	0.000593799	0.000592124	0	0	0	0	0.000270616	0	0.00538181
87	neg_1877	Simple ID		1	neg	1877	23.572	389.244	[M-H]-	generic	C22H34N2O4	2-{3-[2-(diethylazaniumyl)ethyl]-1-[2-(4-methoxyphenyl)acetyl]piperidin-4-yl}acetate	6.2486	6.2486	Unknown	3	29	389.244	[M-H]-	390.252	0.0008811	3.625	Phenylacetamides	HYJUVTMMOSRDLO-UHFFFAOYSA-N	O=C(O)CC1CCN(C(=O)CC2=CC=C(OC)C=C2)CC1CCN(CC)CC	COCONUT=CNP0227029	0	0	0	0	0	0	0	0	0	0	0	0	0.000505044	0.000527621	0.000544588	0.0005332	0.00393824	0.00203734	0.00390027	0	0	0	0
88	neg_1884	Simple ID		1	neg	1884	21.395	390.188	[M-H]-	generic	C17H25N7O4	Binodenoson	5.7837	5.7837	Unknown	3	31	390.188	[M-H]-	391.197	0.0012258	3.459	Purine nucleosides	XJFMHMFFBSOEPR-DNZQAUTHSA-N	OCC1OC(N2C=NC=3C(=NC(=NC32)NN=CC4CCCCC4)N)C(O)C1O	DrugBank=DB04853,COCONUT=CNP0074333	0	0	0	0.00104533	0.000628902	0.000698109	0	0	0	0	0	0	0.000688863	0.000698768	0.000693771	0.000711601	0	0	0	0	0	0	0
89	neg_1591	Simple ID	Other possible annotated peaks for this cluster.	3	neg	1591	14.821	347.164	[M-H]-	generic	C15H28N2O5S	N-[(2R,3S,6R)-2-(hydroxymethyl)-6-[2-oxo-2-(1-piperidinyl)ethyl]-3-oxanyl]ethanesulfonamide	5.7019	5.7019	Unknown	3	36	347.164	[M-H]-	348.172	0.0006165	3.692	C-glycosyl compounds	RAGICHRDMJGUIX-AFICHUSHNA-N	O=C(N1CCCCC1)CC2OC(CO)C(NS(=O)(=O)CC)CC2	ChEBI=CHEBI:99082;CHEBI:99189	0.000487615	0.000517503	0.00044734	0.00225229	0.00182371	0.00186054	0.00105053	0	0.000395952	0.00273214	0.00215305	0.00197653	0.00112963	0.00096135	0.001085	0.00106163	0.000328545	0.000258204	0.000285545	0.00483309	0.00317743	0.00135408	0
90	neg_1921	Simple ID		1	neg	1921	10.15	395.155	[M-H]-	generic	C21H24N4O2S	3-cyclohexyl-6-hydroxy-5-{1H,2H,3H,4H,9H-pyrido[3,4-b]indol-1-yl}-2-sulfanylidene-1,2,3,4-tetrahydropyrimidin-4-one	5.3031	5.3031	Unknown	3	72	395.155	[M-H]-	396.162	-7.94e-05	3.189	Harmala alkaloids	UOFAJPGULOPCKI-UHFFFAOYSA-N	O=C1C(=C(O)NC(=S)N1C2CCCCC2)C3NCCC=4C=5C=CC=CC5NC43	COCONUT=CNP0379077	0	0	0	0	0	0	0	0	0	0	0	0.00263257	0	0.000372007	0.000390331	0	0.000339329	0.000389549	0.00032375	0.00124521	0.0023016	0.00133749	0
91	neg_1926	Simple ID		1	neg	1926	18.83	395.208	[M-H]-	generic	C21H32O7	Cryptoporic acid H	6.3904	6.3904	Unknown	3	36	395.208	[M-H]-	396.215	-0.0008731	3.49	Tricarboxylic acids and derivatives	AFCITBAGIYUEPK-LWSPUMOMNA-N	O=C(O)CC(C(=O)O)C(OCC1C(=C)CCC2C(C)(C)CCCC12C)C(=O)O	KNApSAcK=C00035074,UNPD=UNPD83077,NPA=NPA012849,COCONUT=CNP0321675	0	0	0	0	0	0	0	0	0	0	0	0	0.000573226	0.000655421	0.000711842	0.000700716	0.00283498	0.00348921	0.00326725	0	0	0	0
92	neg_1932	Simple ID		1	neg	1932	7.104	396.127	[M-H]-	generic	C22H23NO4S	3-[1-(4-butylbenzenesulfonyl)-5-methoxy-1H-indol-3-yl]prop-2-enal	4.6066	4.6066	Unknown	3	29	396.127	[M-H]-	397.135	0.0001028	3.243	Benzenesulfonamides	VXSSYXBBFOZZRZ-UHFFFAOYSA-N	O=CC=CC1=CN(C=2C=CC(OC)=CC12)S(=O)(=O)C3=CC=C(C=C3)CCCC	COCONUT=CNP0262746	0	0	0	0	0	0	0	0	0.000792574	0	0	0	0	0.000701892	0.000779025	0.000694868	0.00048894	0.000608294	0.000480242	0.00211841	0.00310445	0.00108993	0
93	neg_1933	Unknown compound		1	neg	1933	17.988	396.242	[M-H]-																		0.00142702	0.00150037	0.00131997	0.000617992	0.000816053	0.000754696	0	0.000477273	0.000584489	0	0	0	0.000529808	0.000573063	0.000572841	0.000583712	0.000181629	0.000290649	0.000209496	0	0	0	0
94	neg_1982	Simple ID		1	neg	1982	23.993	401.243	[M-H]-	generic	C23H34N2O4	1-{2-[4-(carboxylatomethyl)-1-[2-(4-methoxyphenyl)acetyl]piperidin-3-yl]ethyl}piperidin-1-ium	6.5077	6.5077	Unknown	3	35	401.243	[M-H]-	402.252	0.0016811	3.432	Phenylacetamides	KXPBTVJQRUGLGG-UHFFFAOYSA-N	O=C(O)CC1CCN(C(=O)CC2=CC=C(OC)C=C2)CC1CCN3CCCCC3	COCONUT=CNP0237431	0	0	0	0	0	0	0	0	0	0	0	0	0.00175155	0.00193366	0.00192819	0.0018976	0.0135134	0.00686303	0.0143397	0	0	0	0
95	neg_1988	Simple ID		1	neg	1988	11.758	403.124	[M-H]-	generic	C17H24O11	Oleoside 11-methyl ester	6.3297	6.3297	Unknown	3	31	403.123	[M-H]-	404.132	0.0010851	3.554	Terpene glycosides	XSCVKBFEPYGZSL-CLTKARDFNA-N	O=C(O)CC1C(=COC(OC2OC(CO)C(O)C(O)C2O)C1=CC)C(=O)OC	HMDB=HMDB0041550,KNApSAcK=C00037580,FooDB=FDB021533,NANPDB=NANPDB_3099;NANPDB_3119;NANPDB_3149;NANPDB_3159,UNPD=UNPD109727;UNPD15873;UNPD199366;UNPD220343,BLEXP=BLEXPDB00010692563,COCONUT=CNP0206992	0.000564923	0.000556792	0.000529738	0	0	0	0	0	0	0.000944445	0.000450168	0.000494714	0.000476244	0.000413977	0.000406987	0.000433457	0.00053511	0.000412582	0.000362468	0.000993101	0.00135427	0	0
96	neg_1998	Simple ID		1	neg	1998	10.178	405.105	[M-H]-	generic	C17H18N4O8	UNPD141141	5.6439	5.6439	Unknown	3	36	405.105	[M-H]-	406.112	0.0005871	3.144	Pteridines and derivatives	TXDRHIOQUDLCPV-YXYSCNJNNA-N	O=C1NC(=O)C=2N=C(C(=O)N(C2N1)CC(O)C(O)C(O)CO)C=3C=CC(O)=CC3	UNPD=UNPD141141;UNPD78661,COCONUT=CNP0356419	0	0	0.00032925	0	0	0	0	0	0	0.000897653	0.000432148	0.00060755	0	0.000342053	0.000346807	0.000323319	0.000419291	0.000265314	0.000400119	0.000433644	0.00133675	0	0.00165247
97	neg_2006	Simple ID		1	neg	2006	9.368	405.223	[M-H]-	generic	C22H34N2O3S	N-cyclopentyl-2-[7-hydroxy-8-(hydroxymethyl)-2,4a,8-trimethyl-4H,4aH,5H,6H,7H,8H,8aH,9H-naphtho[2,3-d][1,3]thiazol-4-yl]acetamide	5.2851	5.2851	Unknown	3	55	405.223	[M-H]-	406.229	-0.0013625	3.289	Naphthothiazoles	PQYJCNQHVRCJGM-UHFFFAOYSA-N	O=C(NC1CCCC1)CC2C=3N=C(SC3CC4C(C)(CO)C(O)CCC24C)C	COCONUT=CNP0176511	0	0.000425809	0.000403077	0.00050065	0.000497487	0	0.000941522	0.0007142	0.000759658	0.000734035	0.000509964	0	0.000570819	0.000584396	0.000595315	0.000577251	0.000363215	0.000317436	0.00031722	0	0.00121527	0.00130804	0
98	neg_2017	Simple ID		1	neg	2017	20.838	407.23	[M-H]-	generic	C20H32N4O5	1-cyclohexanecarbonyl-4-(2-methoxyacetyl)-N-(2-oxopiperidin-3-yl)piperazine-2-carboxamide	4.0055	4.0055	Unknown	3	15	407.23	[M-H]-	408.237	0.0001937	2.598	Tetrahydropyridines	VVNAFGBQQPVANF-UHFFFAOYSA-N	O=C1NCCCC1NC(=O)C2N(C(=O)C3CCCCC3)CCN(C(=O)COC)C2	COCONUT=CNP0036356	0	0	0	0	0	0	0	0	0	0	0	0	0.00101669	0.000986331	0.000983653	0.000967204	0.00276049	0.0023886	0.00258826	0	0	0	0
99	neg_202	Simple ID		1	neg	202	9.599	188.036	[M-H]-	generic	C10H7NO3	Kynurenic acid	6.5648	6.5648	Unknown	3	33	188.036	[M-H]-	189.043	-0.0002834	3.774	Quinoline carboxylic acids	HCZHHEIFKROPDY-UHFFFAOYSA-N	O=C(O)C1=CC(=O)C=2C=CC=CC2N1	HMDB=HMDB0000715,KNApSAcK=C00026453;C00026494,ChEBI=CHEBI:18344;CHEBI:58454,SMPDB=PW_C000566,YMDB=YMDB01725,T3DB=T3D4160,FooDB=FDB022200,BMDB=BMDB00715,Urine=HMDB0000715,Feces=HMDB0000715,CSF=HMDB0000715,Serum=HMDB0000715,PubChem=25201402;3845,UNPD=UNPD34289,BLEXP=BLEXPDB00000003845,COCONUT=CNP0333612	0.000506216	0.000612766	0.000597049	0	0	0	0.000853224	0.000717395	0.000678827	0.000499531	0	0.000450495	0.000357054	0	0	0	0	0	0	0	0	0	0
100	neg_2038	Simple ID		1	neg	2038	0.982	410.142	[M-H]-	generic	C15H21N7O7	N6-Carbamoyl-L-threonyladenosine	4.8613	4.8613	Unknown	3	29	410.142	[M-H]-	411.15	0.0007696	3.047	Purine nucleosides	GYCVHQYQICRFAX-RQOSYNQUNA-N	O=C(N)NC(C(=O)NC1=NC=NC2=C1N=CN2C3OC(CO)C(O)C3O)C(O)C	HMDB=HMDB0041623	0	0	0	0.000783669	0.00126935	0.00030976	0	0.000811796	0.0013142	0	0.00214572	0.00274932	0.000445625	0.000719494	0.000681841	0.000770252	0.000472549	0.000430821	0.00090226	0	0	0.00178614	0
101	neg_2041	Simple ID		1	neg	2041	7.716	410.142	[M-H]-	generic	C15H21N7O7	N6-Carbamoyl-L-threonyladenosine	5.6591	5.6591	Unknown	3	28	410.142	[M-H]-	411.15	0.0006696	3.359	Purine nucleosides	GYCVHQYQICRFAX-RQOSYNQUNA-N	O=C(N)NC(C(=O)NC1=NC=NC2=C1N=CN2C3OC(CO)C(O)C3O)C(O)C	HMDB=HMDB0041623	0.0019669	0.00214369	0.00189542	0.00239568	0.00276727	0	0.00643172	0	0	0.00541244	0.00527522	0.00767911	0.00366472	0	0	0	0	0	0	0	0	0	0
102	neg_2043	Simple ID		1	neg	2043	7.826	410.142	[M-H]-	generic	C15H21N7O7	N6-Carbamoyl-L-threonyladenosine	5.5077	5.5077	Unknown	3	26	410.142	[M-H]-	411.15	0.0005696	3.375	Purine nucleosides	GYCVHQYQICRFAX-RQOSYNQUNA-N	O=C(N)NC(C(=O)NC1=NC=NC2=C1N=CN2C3OC(CO)C(O)C3O)C(O)C	HMDB=HMDB0041623	0	0	0	0	0	0	0	0.00658573	0.00692533	0	0	0	0	0.00438058	0.00470266	0.00458196	0.00511701	0.0042552	0.00465443	0.00952809	0.0137461	0.00906295	0
103	neg_2046	Simple ID		1	neg	2046	19.197	410.256	[M-H]-	generic	C22H37NO6	Saliniketal B	7.1823	7.1823	Unknown	3	26	410.256	[M-H]-	411.262	-0.0013885	3.942	Sesquiterpenoids	QWSYKJZSJYRUSS-ILMMVIBINA-N	O=C(N)C(=CC=CC(C)C(O)C(C)C(O)C(C)C1OC2(OC(CC2)C1C)C)CO	KNApSAcK=C00040187,UNPD=UNPD38980,NPA=NPA008381,COCONUT=CNP0108050	0.0013656	0.00162771	0.00125409	0	0.000239194	0.000192627	0.00100691	0.000936965	0.00112488	0	0	0	0.00056476	0.000577188	0.000598423	0.000604326	0.000360782	0.000600437	0.000418507	0	0	0	0
104	neg_2078	Simple ID		1	neg	2078	15.294	414.166	[M-H]-	generic	C21H25N3O6	N-{[3,4-dihydroxy-5-({[(pyridin-2-yl)methyl]carbamoyl}methyl)oxolan-2-yl]methyl}-4-methoxybenzamide	6.3118	6.3118	Unknown	3	26	414.166	[M-H]-	415.174	0.0010591	3.795	C-glycosyl compounds	LTBYCYPOTXWCQB-UHFFFAOYSA-N	O=C(NCC1OC(CC(=O)NCC2=NC=CC=C2)C(O)C1O)C3=CC=C(OC)C=C3	COCONUT=CNP0057608	0.00181017	0.00178381	0.00174848	0.000541394	0.000487914	0.000505199	0.000944298	0.000613257	0.000695077	0.00271429	0.00223279	0.00231178	0.000959498	0.000812731	0.000840287	0.000854315	0.000578238	0.000480144	0.000511017	0.00128319	0.00110811	0.00174733	0
105	neg_2096	Simple ID	Other possible annotated peaks for this cluster.	2	neg	2096	20.404	417.259	[M+FA-H]-	generic	C19H36N2O5	Neoenactin M1	5.4581	5.4581	Unknown	3	20	417.259	[M+FA-H]-	372.262	0.0015248	2.886	Alpha amino acid amides	ILLOYMPJYAVZKU-LGWFVXIRNA-N	O=C(CCN(O)C(=O)C(N)CO)CCCCCCC(=O)CCCC(C)C	KNApSAcK=C00017850,UNPD=UNPD76796,NPA=NPA008216,COCONUT=CNP0316949	0	0	0	0	0	0	0	0	0	0	0	0	0	0.000484475	0.000508903	0.000523025	0.00260835	0.00246366	0.00276995	0	0	0	0
106	neg_2098	Simple ID		1	neg	2098	23.041	417.263	[M-H]-	generic	C25H38O5	Simvastatin	7.6262	7.6262	Unknown	3	39	417.263	[M-H]-	418.272	0.0019479	3.907	Delta valerolactones	RYMZZMVNJRMUDD-HGQWONQESA-N	O=C1OC(CCC2C(C=CC3=CC(C)CC(OC(=O)C(C)(C)CC)C32)C)CC(O)C1	HMDB=HMDB0005007,ChEBI=CHEBI:9150;CHEBI:91894;CHEBI:94560;CHEBI:95182,DrugBank=DB00641,SMPDB=PW_C002356,T3DB=T3D4788,FooDB=FDB023580,STOFF=STOFF_2511,BMDB=BMDB05007,Serum=HMDB0005007,UNPD=UNPD99864,BLEXP=BLEXPDB00000054454,COCONUT=CNP0267824	0.00818214	0.00761003	0.00840496	0	0	0	0.00725591	0.00827313	0.00765613	0	0	0	0.00235906	0.00252926	0.00256123	0.00254605	0	0	0	0	0	0	0
107	neg_2102	Simple ID		1	neg	2102	10.416	419.107	[M-H]-	generic	C15H24N4O6S2	Doripenem	5.1491	5.1491	Unknown	3	27	419.106	[M-H]-	420.114	-5e-05	3.097	Thienamycins	AVAACINZEOAHHE-VFZPANTDSA-N	O=C(O)C1=C(SC2CNC(CNS(=O)(=O)N)C2)C(C)C3N1C(=O)C3C(O)C	HMDB=HMDB0041883,ChEBI=CHEBI:135928,STOFF=STOFF_5107,BLEXP=BLEXPDB00000073303,COCONUT=CNP0074707	0	0.000352176	0.000357784	0.00242924	0.00162847	0	0	0	0	0.000495464	0.000368032	0	0.0010943	0.000908048	0.000904671	0.00088497	0.000752243	0.000447309	0.000577906	0.00299947	0.00220479	0.00106527	0
108	neg_2110	Simple ID		1	neg	2110	14.085	420.176	[M-H]-	generic	C20H27N3O7	(3S,6aR,8R,10aR)-N-(1,3-benzodioxol-5-yl)-3-hydroxy-8-[2-(methylamino)-2-oxoethyl]-3,4,6,6a,8,9,10,10a-octahydro-2H-pyrano[2,3-c][1,5]oxazocine-1-carboxamide	6.0334	6.0334	Unknown	3	29	420.176	[M-H]-	421.185	0.0012238	3.575	Benzodioxoles	VGRBJEXDKRVWRS-KOPKVYSCNA-N	O=C(NC1=CC=C2OCOC2=C1)N3CC(O)COCC4OC(CC(=O)NC)CCC34	ChEBI=CHEBI:128386	0.000767073	0.000864703	0.000755677	0	0	0	0	0	0	0	0	0	0.000431093	0	0	0.00047931	0	0	0	0	0	0	0
109	pos_5151	Double ID		5	pos	5151	11.8	377.145	[M+H]+	generic	C17H20N4O6	Riboflavin	8.515	8.515	Unknown	3	42	377.145	[M+H]+	376.138	0.0002608	4.705	Flavins	AUNGANRZJHBGPY-QTZZOOGMNA-N	O=C1N=C2C(=NC=3C=C(C(=CC3N2CC(O)C(O)C(O)CO)C)C)C(=O)N1	HMDB=HMDB0000244,KNApSAcK=C00001552,ChEBI=CHEBI:17015;CHEBI:57986;CHEBI:95299,DrugBank=DB00140,SMPDB=PW_C000165,YMDB=YMDB00534,T3DB=T3D4817,FooDB=FDB012160;FDB012928;FDB031145,STOFF=STOFF_3910,BMDB=BMDB00244,Urine=HMDB0000244,Saliva=HMDB0000244,Feces=HMDB0000244,ECMDB=ECMDB00244,CSF=HMDB0000244,Serum=HMDB0000244,PubChem=45480541;493570;122171;6759,PlantCyc=RIBOFLAVIN,UNPD=UNPD100727;UNPD116686,BL…	0.00276022	0.00327414	0.00332483	0.00104031	0.00102087	0.00123255	0.00185546	0.00229722	0.00229011	0.00594433	0.00516438	0.00481623	0.00223363	0.00241681	0.00251651	0.00259105	0.00279413	0.00139714	0.00252949	0.00722359	0.00960077	0.0108852	0
110	neg_2123	Simple ID		1	neg	2123	20.985	421.258	[M-H]-	generic	C24H38O6	UNPD165994	5.7879	5.7879	Unknown	3	40	421.258	[M-H]-	422.267	0.0011625	3.345	Diterpenoids	ILGOTJMUMBDLFG-CJCLBDRMNA-N	O=C(O)CC1(OC2(C(=CC(O)C3C(C)(C)CCCC32C)COC(=O)C(C)C)CC1)C	UNPD=UNPD165994,COCONUT=CNP0303828	0	0	0	0	0	0	0	0	0	0	0	0	0.000766813	0.000814418	0.000835164	0.000840699	0.0044051	0.00542113	0.00500795	0	0	0	0
111	neg_2136	Simple ID		1	neg	2136	20.04	423.248	[M-H]-	generic	C18H32N8O4	2-[2-(2-amino-4-methylpentanamido)-3-(1H-imidazol-5-yl)propanamido]-5-[(diaminomethylidene)amino]pentanoic acid	6.8182	6.8182	Unknown	3	46	423.248	[M-H]-	424.255	-0.0007249	3.832	Oligopeptides	VZBIUJURDLFFOE-UHFFFAOYSA-N	O=C(O)C(NC(=O)C(NC(=O)C(N)CC(C)C)CC1=CN=CN1)CCCN=C(N)N	COCONUT=CNP0191986	0	0	0	0.042183	0.0388951	0.0333381	0	0	0	0	0	0	0.010309	0.0107842	0.011116	0.0112529	0	0	0	0	0	0	0
112	neg_2153	Simple ID		1	neg	2153	12.229	425.278	[M-H]-	generic	C21H38N4O5	UNPD147859	6.0455	6.0455	Unknown	3	24	425.278	[M-H]-	426.284	-0.0008561	3.454	Alpha amino acids and derivatives	DILZZJSTCKLTDC-TWAUYLRJNA-N	O=C(NO)CC(C(=O)N1NCCCC1C(=O)NC(C(=O)C)CC(C)C)CCCCC	UNPD=UNPD147859,COCONUT=CNP0323367	0	0	0	0	0	0	0	0	0	0	0	0	0.00046166	0.000446441	0.000502354	0.000481186	0	0	0	0	0	0	0
113	neg_2165	Unknown compound		1	neg	2165	24.098	427.281	[M-H]-																		0	0	0	0.000415886	0.000348199	0.000495093	0	0.000852521	0	0	0.000344024	0.000451231	0	0.000266719	0	0	0.000310411	0.000312046	0.000351731	0	0	0	0
114	neg_2179	Simple ID		1	neg	2179	23.037	429.264	[M-H]-	generic	C26H38O5	Lupulone D	5.7741	5.7741	Unknown	3	32	429.264	[M-H]-	430.272	0.0005479	3.415	Benzofurans	UFNSPVPZCKZBHN-UHFFFAOYNA-N	O=C(C1=C(O)C(=C2OC(CC2(C1=O)CC=C(C)C)C(O)(C)C)CC=C(C)C)CC(C)C	KNApSAcK=C00042711,UNPD=UNPD51684,COCONUT=CNP0203294	0	0	0	0	0	0	0	0	0	0	0	0	0.000736212	0.000790268	0.000818689	0.000789277	0.00380384	0.00529747	0.0044418	0	0	0	0
115	neg_2181	Unknown compound		1	neg	2181	25.426	429.295	[M-H]-																		0.000550875	0.000723018	0.000455504	0.00359114	0.00382272	0.00551706	0.00188877	0.0067962	0.00233849	0.0006877	0.00316859	0.0042652	0.00235726	0.00253473	0.00248526	0.00238489	0.00205732	0.00256008	0.00277621	0.0019019	0.000944238	0.000906017	0
116	neg_2182	Simple ID		1	neg	2182	11.726	430.122	[M-H]-	generic	C18H26ClN3O5S	N-{5-[(4-acetyl-1,4-diazepan-1-yl)methyl]-4-hydroxyoxolan-3-yl}-4-chlorobenzene-1-sulfonamide	5.087	5.087	Unknown	3	12	430.122	[M-H]-	431.128	-0.0009068	3.371	Benzenesulfonamides	LVPCQNYGIYMKAS-UHFFFAOYSA-N	O=C(N1CCN(CCC1)CC2OCC(NS(=O)(=O)C3=CC=C(Cl)C=C3)C2O)C	COCONUT=CNP0026534	0	0	0	0.000787647	0.000520181	0.00060535	0	0	0	0.00139665	0.00103813	0.000840884	0.00065681	0.000527675	0.000512182	0.000525347	0	0	0	0.00391265	0.00133632	0.00176864	0
117	neg_2210	Simple ID		1	neg	2210	0.995	434.106	[M-H]-	generic	C16H25N3O7S2	(1n)-4-N-Butoxyphenylsulfonyl-(2r)-N-Hydroxycarboxamido-(4s)-Methanesulfonylamino-Pyrrolidine	5.0797	5.0797	Unknown	3	22	434.106	[M-H]-	435.113	-0.0003843	3.292	Proline and derivatives	ULDXUWXTVRRUND-SWLSCSKDSA-N	O=C(NO)C1N(CC(NS(=O)(=O)C)C1)S(=O)(=O)C2=CC=C(OCCCC)C=C2	DrugBank=DB02367	0	0	0	0	0	0.000262397	0	0.000524723	0.000523234	0.00151903	0.00384829	0.0156305	0.00191405	0.00218773	0.00219247	0.00230546	0.00253278	0.000913628	0.00250524	0	0	0	0
118	neg_2220	Simple ID		1	neg	2220	21.844	435.273	[M-H]-	generic	C25H40O6	simvastatin hydroxy acid	7.0944	7.0944	Unknown	3	49	435.273	[M-H]-	436.282	0.0019125	3.849	Medium-chain hydroxy acids and derivatives	XWLXKKNPFMNSFA-KJXPKYGMNA-N	O=C(O)CC(O)CC(O)CCC1C(C=CC2=CC(C)CC(OC(=O)C(C)(C)CC)C21)C	HMDB=HMDB0061047,Urine=HMDB0061047,Serum=HMDB0061047,BLEXP=BLEXPDB00000064718,COCONUT=CNP0074353	0.0168601	0.0159806	0.0166619	0	0	0	0.012248	0.0132007	0.0126301	0	0	0	0.00441608	0.00478064	0.00480468	0.00473487	0	0	0	0	0	0	0
119	neg_2241	Simple ID		1	neg	2241	11.43	438.139	[M-H]-	generic	C24H25NO5S	3-(5-oxo-4-{[4-(propan-2-yl)phenyl]methylidene}-3,10-dioxa-12-azatricyclo[7.4.0.0?,?]trideca-1,6,8-trien-12-yl)-1??-thiolane-1,1-dione	5.0444	5.0444	Unknown	3	35	438.139	[M-H]-	439.145	-0.0008326	2.959	Aurone flavonoids	RVEQYKZQGSSQOI-UHFFFAOYSA-N	O=C1C(OC=2C1=CC=C3OCN(CC32)C4CCS(=O)(=O)C4)=CC5=CC=C(C=C5)C(C)C	COCONUT=CNP0053526	0.000924324	0.000972303	0.00101264	0.00379061	0.00336314	0.00370823	0.00485625	0.00597867	0.00490181	0.00202558	0.00203921	0.00248961	0.00345767	0.00330152	0.00354796	0.00354353	0.00313027	0.0015487	0.00218132	0.00502091	0.00788386	0.00411937	0
120	neg_2242	Simple ID		1	neg	2242	11.873	438.139	[M-H]-	generic	C24H25NO5S	3-(5-oxo-4-{[4-(propan-2-yl)phenyl]methylidene}-3,10-dioxa-12-azatricyclo[7.4.0.0?,?]trideca-1,6,8-trien-12-yl)-1??-thiolane-1,1-dione	5.169	5.169	Unknown	3	28	438.139	[M-H]-	439.145	-0.0010326	2.933	Aurone flavonoids	RVEQYKZQGSSQOI-UHFFFAOYSA-N	O=C1C(OC=2C1=CC=C3OCN(CC32)C4CCS(=O)(=O)C4)=CC5=CC=C(C=C5)C(C)C	COCONUT=CNP0053526	0	0	0	0.00180749	0.00161742	0.00178348	0.00200523	0.0021998	0.00190178	0.00121187	0	0	0.00176583	0.00146665	0.0015425	0.00155479	0.00111992	0	0	0.00213524	0.00303839	0	0
121	neg_2247	Simple ID		1	neg	2247	24.17	438.261	[M-H]-	generic	C20H42NO7P	LysoPE(0:0/15:0)	7.106	7.106	Unknown	3	25	438.261	[M-H]-	439.27	0.0017129	3.975	2-acyl-sn-glycero-3-phosphoethanolamines	GIUNBNKDUHWVHI-LJQANCHMSA-N	O=C(OC(CO)COP(=O)(O)OCCN)CCCCCCCCCCCCCC	HMDB=HMDB0011472,FooDB=FDB028188,BMDB=BMDB11472,LipidMAPS=LMGP02050035,COCONUT=CNP0225516	0	0	0	0	0	0	0.000823463	0.00217564	0.000611353	0	0	0	0.000344544	0.000371575	0.000374118	0.000372366	0.000804128	0.00167312	0.00138777	0	0	0	0
122	neg_225	Simple ID		1	neg	225	20.963	195.102	[M-H]-	generic	C11H16O3	(-)-Loliolide;Loliolide	7.7717	7.7717	Unknown	3	21	195.102	[M-H]-	196.11	0.0005679	4.323	Benzofurans	XEVQXKKKAVVSMW-SMLPMWDWNA-N	O=C1OC2(C(=C1)C(C)(C)CC(O)C2)C	KNApSAcK=C00019144;C00019146;C00038082,ChEBI=CHEBI:69774,FooDB=FDB004536,NANPDB=NANPDB_1515;NANPDB_3845;NANPDB_5536;NANPDB_6103;NANPDB_6833,UNPD=UNPD128463;UNPD141914;UNPD172679;UNPD89001,BLEXP=BLEXPDB00000100332,COCONUT=CNP0245641	0.000443644	0.000432247	0.00034496	0.0128991	0.0103652	0.0103661	0.000808117	0	0	0.0065636	0.00857426	0.00914841	0.00464603	0.00501008	0.00484017	0.0049832	0.00460054	0.00283893	0.00462781	0.00867449	0.00724198	0.00486701	0
123	neg_2288	Simple ID		1	neg	2288	8.443	443.177	[M-H]-	generic	C22H28N4O4S	LSM-14623	5.5456	5.5456	Unknown	3	24	443.177	[M-H]-	444.183	-0.0007501	3.48	Pyrrolidinecarboxamides	YAZSZKUPWYSKIW-JNWYSCRBNA-N	O=C1C(=CC=C2N1CC3N(CC4=NC=CS4)C2C(C(=O)NCCOC)C3CO)C=CC	ChEBI=CHEBI:103279;CHEBI:103327	0.000599907	0.000635258	0.000601377	0	0.000283936	0	0.000833539	0.000700496	0	0	0	0	0.000360838	0	0	0	0	0	0	0	0	0	0
124	neg_2289	Simple ID		1	neg	2289	8.522	443.177	[M-H]-	generic	C22H28N4O4S	LSM-14623	5.14	5.14	Unknown	3	19	443.177	[M-H]-	444.183	-0.0007501	3.309	Pyrrolidinecarboxamides	YAZSZKUPWYSKIW-JNWYSCRBNA-N	O=C1C(=CC=C2N1CC3N(CC4=NC=CS4)C2C(C(=O)NCCOC)C3CO)C=CC	ChEBI=CHEBI:103279;CHEBI:103327	0	0	0	0	0	0	0	0	0.000773008	0	0	0	0	0.000394813	0.000419268	0.000394907	0.00035115	0.000310775	0.000303303	0	0	0	0
125	neg_2292	Simple ID		1	neg	2292	23.803	443.28	[M-H]-	generic	C27H40O5	1,25-Dihydroxyvitamin D3-26,23-lactone	7.1489	7.1489	Unknown	3	49	443.28	[M-H]-	444.288	9.79e-05	3.998	Vitamin D and derivatives	WMYIVSWWSRCZFA-RWVJFQLJSA-N	O=C1OC(CC(C)C2CCC3C(=CC=C4C(=C)C(O)CC(O)C4)CCCC32C)CC1(O)C	HMDB=HMDB0000969,ChEBI=CHEBI:47837,FooDB=FDB022344,BMDB=BMDB00969,LipidMAPS=LMST03020122;LMST03020123;LMST03020124;LMST03020125,PubChem=6438368,BLEXP=BLEXPDB00006438368,COCONUT=CNP0032953	0.0102932	0.00991399	0.00986456	0	0	0	0.0189942	0.0218364	0.0208039	0	0	0	0.00404668	0.00440192	0.00447835	0.00437575	0	0	0	0	0	0	0
126	neg_2304	Unknown compound		1	neg	2304	16.218	444.269	[M-H]-																		0	0	0	0.00360743	0.00500654	0.00504459	0	0	0	0	0	0	0.00168704	0.00173887	0.00179489	0.00179063	0	0	0	0	0	0	0
127	neg_2327	Simple ID		1	neg	2327	16.359	449.201	[M-H]-	generic	C24H34O6S	methyl 2-[(2-{2,10-dihydroxy-9a,11a-dimethyl-7-oxo-1H,2H,3H,3aH,3bH,4H,5H,7H,8H,9H,9aH,9bH,10H,11H,11aH-cyclopenta[a]phenanthren-2-yl}-2-oxoethyl)sulfanyl]acetate	6.0426	6.0426	Unknown	3	27	449.201	[M-H]-	450.208	-0.0004666	3.949	Androgens and derivatives	RSOVQQJKSMPCRP-UHFFFAOYSA-N	O=C(OC)CSCC(=O)C1(O)CC2C3CCC4=CC(=O)CCC4(C)C3C(O)CC2(C)C1	COCONUT=CNP0364153	0.000893676	0.000620849	0.000677894	0.000420355	0.000191551	0.00045848	0.00172387	0.00144322	0.00134552	0.00118239	0.00264934	0.00225064	0.000981991	0.000837373	0.000869195	0.000903024	0.000896309	0.000754508	0.00122686	0.000781559	0.00166834	0.000541313	0
128	neg_2332	Simple ID		1	neg	2332	15.133	450.171	[M-H]-	generic	C21H29N3O6S	1-cyclobutanecarbonyl-4-({4-methoxy-6-methyl-2H,5H,6H,7H,8H-[1,3]dioxolo[4,5-g]isoquinolin-9-yl}sulfonyl)piperazine	4.8686	4.8686	Unknown	3	35	450.171	[M-H]-	451.178	-0.0006698	3.024	Tetrahydroisoquinolines	RAZSKFXDIOLZGJ-UHFFFAOYSA-N	O=C(N1CCN(CC1)S(=O)(=O)C=2C=3OCOC3C(OC)=C4C2CCN(C)C4)C5CCC5	COCONUT=CNP0362745	0	0	0	0	0	0	0	0	0	0	0	0	0.000305229	0	0	0	0	0	0	0	0	0	0.00336627
129	neg_2335	Simple ID		1	neg	2335	23.901	450.261	[M-H]-	generic	C21H42NO7P	LysoPE(16:1(9Z)/0:0)	7.2973	7.2973	Unknown	3	18	450.261	[M-H]-	451.27	0.0013129	4.086	1-acyl-sn-glycero-3-phosphoethanolamines	DSOWUEHXZJUNID-WHXUGTBJSA-N	O=C(OCC(O)COP(=O)(O)OCCN)CCCCCCCC=CCCCCCC	HMDB=HMDB0011504,YMDB=YMDB01201,FooDB=FDB028220,BMDB=BMDB11504,LipidMAPS=LMGP02050010,BLEXP=BLEXPDB00052925129,COCONUT=CNP0273411	0	0	0	0	0	0	0	0.000380273	0	0	0	0	0.000322493	0.000350437	0.000348549	0.000356373	0.000777357	0.00238923	0.00153987	0	0	0	0
130	neg_2345	Simple ID		1	neg	2345	11.881	452.152	[M-H]-	generic	C20H27N3O7S	N-{3-[(1-carbamoyl-3-methanesulfonylpropyl)carbamoyl]-5,6-dihydroxycyclohex-2-en-1-yl}-4-methylbenzamide	5.6509	5.6509	Unknown	3	40	452.152	[M-H]-	453.157	-0.0019052	3.573	N-acyl-alpha amino acids and derivatives	JVDOANFLXPKBAZ-UHFFFAOYSA-N	O=C(N)C(NC(=O)C1=CC(NC(=O)C2=CC=C(C=C2)C)C(O)C(O)C1)CCS(=O)(=O)C	COCONUT=CNP0229379	0	0	0	0.00574582	0.00521928	0.00497452	0.00693051	0.00774194	0.00748509	0.00446562	0.00257858	0.00214569	0.00617285	0.00582308	0.00601947	0.00589986	0.00198018	0.0012371	0.00145651	0.0188334	0.01879	0.0124739	0
131	neg_2365	Simple ID		1	neg	2365	14.096	454.228	[M-H]-	generic	C23H37NO6S	20-Hydroxy-leukotriene E4	5.9157	5.9157	Unknown	3	27	454.228	[M-H]-	455.234	-0.0009175	3.468	Leukotrienes	BJRMBXPQAMDCMG-QHZDNRHLSA-N	O=C(O)CCCC(O)C(SCC(N)C(=O)O)C=CC=CC=CCC=CCCCCCO	HMDB=HMDB0012639,ChEBI=CHEBI:28700;CHEBI:58584,FooDB=FDB029162,LipidMAPS=LMFA03020025;LMFA03020062,PubChem=5280606,COCONUT=CNP0016823	0	0	0	0.00108081	0.0010607	0.000977183	0	0	0	0.00246153	0.00227491	0.00197324	0.000738624	0.000641889	0.000665495	0.000653528	0	0	0	0.00125292	0.00146612	0.0023764	0
132	neg_2380	Unknown compound		1	neg	2380	25.638	456.264	[M-H]-																		0	0	0	0.00251251	0.00421562	0.00358115	0	0	0	0	0	0	0	0.000705507	0.000704261	0.000669805	0.000862776	0.00126115	0.00102516	0	0	0	0
133	neg_2384	Simple ID		1	neg	2384	9.037	457.149	[M-H]-	generic	C24H26O9	Mulberroside C	5.062	5.062	Unknown	3	66	457.149	[M-H]-	458.158	0.001306	3.076	2-arylbenzofuran flavonoids	OHVJCFZJKPEJRL-SJUIIRKRNA-N	OC=1C=C(OC2OCC(O)C(O)C2O)C=C(C1)C=3OC=4C=C5OC(C)(C)C(O)CC5=CC4C3	KNApSAcK=C00019263,UNPD=UNPD127831,BLEXP=BLEXPDB00000190453,COCONUT=CNP0254814	0	0	0	0	0	0	0.000958102	0.00155014	0.00151187	0	0	0	0.000396111	0.000438648	0.00046094	0.000420715	0	0	0	0	0	0	0
134	neg_2398	Simple ID		1	neg	2398	22.709	457.258	[M-H]-	generic	C27H38O6	Lucidenic acid A	5.2385	5.2385	Unknown	3	29	457.258	[M-H]-	458.267	0.0017625	2.975	Triterpenoids	INIPQDKLXQHEAJ-UHFFFAOYNA-N	O=C(O)CCC(C)C1CC(=O)C2(C3=C(C(=O)CC12C)C4(C)CCC(=O)C(C)(C)C4CC3O)C	HMDB=HMDB0037611,KNApSAcK=C00023875,FooDB=FDB016724,UNPD=UNPD116075;UNPD1280;UNPD137542;UNPD206417,BLEXP=BLEXPDB00014109375,NPA=NPA015826,COCONUT=CNP0199002	0.00117473	0.00115394	0.000954812	0	0	0	0.00226464	0.00258393	0.00285285	0	0	0	0.000355015	0.000400935	0.000404636	0.000382388	0	0	0	0	0	0	0
135	neg_1892	Simple ID	Other possible annotated peaks for this cluster.	2	neg	1892	22.481	391.248	[M-H]-	generic	C23H36O5	3beta-Malonyloxy-15-hydroxy-ent-labda-7,13E-dien	7.1431	7.1431	Unknown	3	46	391.248	[M-H]-	392.256	0.0004978	4.091	Diterpenoids	CTDDJAPBAKTNOG-GIDPUFOHNA-N	O=C(O)CC(=O)OC1CCC2(C)C(C(=CCC2C1(C)C)C)CCC(=CCO)C	KNApSAcK=C00022597,UNPD=UNPD185827,COCONUT=CNP0192420	0.019944	0.0195197	0.0200963	0	0	0	0.0261552	0.0290734	0.0285438	0	0	0	0.00681957	0.007608	0.00776911	0.00769869	0	0	0	0	0	0	0
136	neg_241	Simple ID		1	neg	241	23.306	196.134	[M-H]-	generic	C11H19NO2	Asenjonamide B	4.3419	4.3419	Unknown	3	22	196.135	[M-H]-	197.142	-0.0001976	2.792	b'-hydroxy-alpha,beta-unsaturated ketones	JZDUBTRQFFMDRN-BQYQJAHWSA-N	O=C(N)C(C(=O)C(=CCCCC)C)C	NPA=NPA021730,COCONUT=CNP0073538	0	0	0	0.00397539	0.00611318	0.00550763	0	0	0	0	0	0	0.0008933	0.000982219	0.00103155	0.000972237	0	0	0	0	0	0	0
137	neg_2420	Simple ID		1	neg	2420	16.241	461.24	[M-H]-	generic	C23H34N4O6	2-({3-[(cyclohexylcarbamoyl)amino]-1,4,5-trihydroxycyclohexyl}formamido)-3-phenylpropanamide	6.5173	6.5173	Unknown	3	40	461.24	[M-H]-	462.248	0.0001584	3.903	Amphetamines and derivatives	JFJNWEZLNXUDGW-UHFFFAOYSA-N	O=C(NC1CCCCC1)NC2CC(O)(C(=O)NC(C(=O)N)CC=3C=CC=CC3)CC(O)C2O	COCONUT=CNP0297855	0	0	0	0.00133107	0.00116693	0.00119104	0	0	0	0.00585944	0.00602537	0.00578546	0.000805871	0.000807047	0.000849563	0.00083619	0	0	0	0	0	0	0
138	neg_2427	Simple ID		1	neg	2427	15.854	462.187	[M-H]-	generic	C26H29N3O3S	1-(4-hydroxy-4-{2-[(1,2,3,4-tetrahydroisoquinolin-2-yl)methyl]-1,3-thiazol-4-yl}piperidin-1-yl)-2-phenoxyethan-1-one	5.5037	5.5037	Unknown	3	74	462.187	[M-H]-	463.193	-0.0013137	3.363	Tetrahydroisoquinolines	VLEVZAPFBFXRJG-UHFFFAOYSA-N	O=C(N1CCC(O)(C=2N=C(SC2)CN3CC=4C=CC=CC4CC3)CC1)COC=5C=CC=CC5	COCONUT=CNP0007145	0.00145055	0.00170763	0.00117935	0.000273737	0.00028381	0.000284327	0	0	0	0.00645788	0.00562037	0.00599257	0.00147624	0.00153927	0.00154819	0.00149502	0.000763315	0.00102173	0.000702554	0.0040144	0.0047951	0.0060672	0
139	neg_2428	Simple ID		1	neg	2428	16.233	462.187	[M-H]-	generic	C26H29N3O3S	1-(4-hydroxy-4-{2-[(1,2,3,4-tetrahydroisoquinolin-2-yl)methyl]-1,3-thiazol-4-yl}piperidin-1-yl)-2-phenoxyethan-1-one	6.0105	6.0105	Unknown	3	29	462.187	[M-H]-	463.193	-0.0016137	3.412	Tetrahydroisoquinolines	VLEVZAPFBFXRJG-UHFFFAOYSA-N	O=C(N1CCC(O)(C=2N=C(SC2)CN3CC=4C=CC=CC4CC3)CC1)COC=5C=CC=CC5	COCONUT=CNP0007145	0.000572003	0.000608508	0.000523682	0	0	0	0.000486692	0.000516738	0.000530446	0.000679641	0	0	0.000512153	0.000549434	0.000550277	0.000562827	0.000268927	0.000270028	0	0	0.000613532	0	0
140	neg_2432	Unknown compound		1	neg	2432	24.537	463.295	[M-H]-																		0	0	0	0	0	0	0	0	0	0	0	0	0.000409355	0.000461713	0.000441117	0.000443461	0.00105767	0.00185892	0.00104502	0	0	0	0
141	neg_2449	Simple ID		1	neg	2449	12.992	466.166	[M-H]-	generic	C21H29N3O7S	2-methoxy-4-(methylsulfanyl)-N-{2,3,5-trihydroxy-5-[(2-oxopiperidin-3-yl)carbamoyl]cyclohexyl}benzamide	6.1728	6.1728	Unknown	3	29	466.166	[M-H]-	467.173	-0.0006552	3.836	Hybrid peptides	WQEJICBIHYLXCQ-UHFFFAOYSA-N	O=C(NC1CC(O)(C(=O)NC2C(=O)NCCC2)CC(O)C1O)C3=CC=C(SC)C=C3OC	COCONUT=CNP0052790	0	0	0	0.000274118	0.000256843	0	0.00122715	0.000945166	0.00074994	0.000492967	0.000370873	0	0.000503188	0.000433306	0.000424579	0.000449096	0.000213612	0	0	0.000667858	0	0.000572656	0
142	neg_2465	Simple ID		1	neg	2465	11.167	468.144	[M-H]-	generic	C20H27N3O8S	2-amino-4-({1-[(carboxymethyl)-C-hydroxycarbonimidoyl]-2-[(1-hydroxy-2-methyl-3-oxo-1-phenylpropan-2-yl)sulfanyl]ethyl}-C-hydroxycarbonimidoyl)butanoic acid	5.6283	5.6283	Unknown	3	36	468.144	[M-H]-	469.152	0.0002094	3.364	Peptides	ANKRFOYLRUGMKS-UHFFFAOYNA-N	O=CC(SCC(N=C(O)CCC(N)C(=O)O)C(O)=NCC(=O)O)(C)C(O)C=1C=CC=CC1	HMDB=HMDB0133632	0.00316723	0.00321172	0.00299038	0.00993646	0.00844442	0.00877681	0.00699608	0.00621006	0.00622617	0.00705814	0.0042255	0.00499682	0.00668409	0.00642067	0.00673022	0.00666291	0.00423536	0.00311541	0.00344256	0.00706853	0.0130972	0.0106021	0.000949748
143	neg_2466	Simple ID		1	neg	2466	10.89	468.145	[M-H]-	generic	C20H27N3O8S	2-amino-4-({1-[(carboxymethyl)-C-hydroxycarbonimidoyl]-2-[(1-hydroxy-2-methyl-3-oxo-1-phenylpropan-2-yl)sulfanyl]ethyl}-C-hydroxycarbonimidoyl)butanoic acid	5.6327	5.6327	Unknown	3	31	468.145	[M-H]-	469.152	-9.06e-05	3.382	Peptides	ANKRFOYLRUGMKS-UHFFFAOYNA-N	O=CC(SCC(N=C(O)CCC(N)C(=O)O)C(O)=NCC(=O)O)(C)C(O)C=1C=CC=CC1	HMDB=HMDB0133632	0.00444397	0.00414576	0.00402	0	0.00695198	0	0.00592432	0.00638304	0.00631991	0.00651967	0.00520864	0.00671725	0.00660004	0.00611088	0.00639889	0.00655841	0.00372968	0.00294152	0.00310408	0.00953088	0.0111258	0.011341	0
144	neg_2488	Simple ID		1	neg	2488	26.965	470.279	[M-H]-	generic	C25H37N5O4	N-[(2S,3S,6S)-2-(hydroxymethyl)-6-[2-[4-(4-methoxyphenyl)-1-triazolyl]ethyl]-3-oxanyl]-3-(1-piperidinyl)propanamide	4.7728	4.7728	Unknown	3	26	470.279	[M-H]-	471.285	-0.0017218	2.818	C-glycosyl compounds	CTEVGNUGMCZMIF-AVZFCHTHNA-N	O=C(NC1CCC(OC1CO)CCN2N=NC(=C2)C=3C=CC(OC)=CC3)CCN4CCCCC4	ChEBI=CHEBI:97114;CHEBI:97993;CHEBI:98078;CHEBI:98170;CHEBI:99231;CHEBI:101012;CHEBI:101319;CHEBI:102334	0	0	0	0	0	0	0	0	0	0	0	0	0.000702615	0.000711414	0.000683233	0.000638387	0	0	0	0	0	0	0
145	neg_2497	Simple ID		1	neg	2497	24.395	471.245	[M-H]-	generic	C21H36N4O8	laninamivir octanoate hydrate	6.511	6.511	Unknown	3	17	471.245	[M-H]-	472.253	0.0012377	3.623	Fatty acid esters	UKTIJASCFRNWCB-BUQIGAELNA-N	O=C(O)C=1OC(C(OC)C(O)COC(=O)CCCCCCC)C(NC(=O)C)C(C1)NC(=N)N	ChEBI=CHEBI:134741,BLEXP=BLEXPDB00009847629	0	0	0	0	0	0	0	0	0	0	0	0	0.00078794	0.000774302	0.00077948	0.000773628	0.000895226	0.0007349	0.000892296	0	0	0	0
146	neg_2514	Simple ID	Other possible annotated peaks for this cluster.	2	neg	2514	32.847	473.22	[M-H]-	generic	C26H34O8	AF 1;Acremolactone A	4.7902	4.7902	Unknown	3	22	473.22	[M-H]-	474.225	-0.0021084	2.917	Fatty alcohols	AIDBYRCMBCUHKZ-NGUMDEIDNA-N	O=C1OC2(C)C(O)CC3C(=COC4(OC34)C56OC6(C)CC=CC5O)C2C1C(O)C(=CCCC)C	KNApSAcK=C00016105,UNPD=UNPD4997,NPA=NPA002575,COCONUT=CNP0296594	0	0	0	0	0	0.000177901	0.00058434	0.000456859	0.000440614	0	0.000274457	0	0	0	0.000278278	0	0.000208591	0.000162117	0.000217792	0.000471662	0	0.000406015	0.000242252
147	neg_2526	Simple ID		1	neg	2526	10.219	474.257	[M-H]-	generic	C20H37N5O8	G-367 S1	6.9286	6.9286	Unknown	3	45	474.257	[M-H]-	475.264	3.67e-05	3.714	Aminocyclitol glycosides	UIOPKYRBKJSWDC-UHFFFAOYSA-N	O=CNC1=C(OC(CN)CC1)OC2C(O)C(OC3OCC(O)(C)C(NC)C3O)C(N)CC2N	NPA=NPA020971,COCONUT=CNP0073762	0.00227072	0.00241608	0.00222938	0.00104038	0.000998694	0.00114048	0.00111426	0.000668868	0.000654958	0.00156391	0.00093123	0.000823381	0.000833521	0.00100082	0.000977947	0.000931407	0	0	0	0.00107357	0.00250427	0.00117478	0
148	neg_2529	Simple ID		1	neg	2529	8.13	475.142	[M-H]-	generic	C28H20N4O4	10-[4-(furan-2-carbonyl)piperazine-1-carbonyl]-1,11-diazapentacyclo[10.7.1.0?,?.0?,??.0??,??]icosa-2,4,6,8,10,12(20),13,15,17-nonaen-19-one	4.4122	4.4122	Unknown	3	27	475.142	[M-H]-	476.148	-0.0010213	2.853	Indolonaphthyridine alkaloids	CJFVMVCLJZICAF-UHFFFAOYSA-N	O=C(C=1N=C2C=3C=CC=CC3C(=O)N4C=5C=CC=CC5C(C1)=C24)N6CCN(C(=O)C=7OC=CC7)CC6	COCONUT=CNP0391763	0	0	0	0	0	0	0	0	0	0.000714568	0.000683009	0.000804794	0.000584888	0.000632344	0	0	0	0	0	0	0	0	0
149	neg_2530	Unknown compound		1	neg	2530	8.196	475.146	[M-H]-																		0	0	0	0	0	0	0	0	0	0	0	0	0	0	0.000678254	0.000614985	0	0	0	0.00599931	0.00619166	0.00357345	0
150	neg_2549	Simple ID		1	neg	2549	18.351	478.228	[M-H]-	generic	C25H37NO6S	Epothilone A1;(-)-Epothilone A1	5.9978	5.9978	Unknown	3	21	478.228	[M-H]-	479.234	-0.0009175	3.286	Macrolides and analogues	XBRMHTMQENGRNB-MZCYNDJVNA-N	O=C1OC(C(=CC=2N=C(SC2)C)C)CC3OC3CCCC(C)C(O)C(C(=O)C(C)C(O)C1)C	KNApSAcK=C00045897;C00045898,UNPD=UNPD163116,NPA=NPA005908,COCONUT=CNP0293465	0.00133375	0.00149001	0.00128927	0	0	0	0	0	0	0.000415318	0	0	0	0.000265988	0.000280588	0.000283656	0	0	0	0	0	0	0
151	neg_2558	Simple ID		1	neg	2558	22.477	479.276	[M+FA-H]-	generic	C24H38N2O5	N-[7-(1-{[(furan-2-yl)methyl]carbamoyl}ethyl)-8-hydroxy-1,4a-dimethyl-decahydronaphthalen-2-yl]-3-methoxypropanamide	5.4895	5.4895	Unknown	3	19	479.276	[M+FA-H]-	434.278	0.0001749	3.391	Eudesmane, isoeudesmane or cycloeudesmane sesquiterpenoids	BJGQPUPLKOIZNJ-UHFFFAOYSA-N	O=C(NC1CCC2(C)CCC(C(O)C2C1C)C(C(=O)NCC=3OC=CC3)C)CCOC	COCONUT=CNP0067114	0	0	0	0	0	0	0	0	0	0	0	0	0.000601962	0.00066327	0.000724661	0.00069935	0.00327949	0.0037207	0	0	0	0	0
152	neg_257	Simple ID		1	neg	257	16.956	200.129	[M-H]-	generic	C10H19NO3	Capryloylglycine	5.0113	5.0113	Unknown	3	24	200.129	[M-H]-	201.136	0.000517	3.041	N-acyl-alpha amino acids	SAVLIIGUQOSOEP-UHFFFAOYSA-N	O=C(O)CNC(=O)CCCCCCC	HMDB=HMDB0000832,ChEBI=CHEBI:74099,FooDB=FDB022273,STOFF=STOFF_5946,BMDB=BMDB00832,Urine=HMDB0000832,BLEXP=BLEXPDB00000084290,COCONUT=CNP0052738	0	0	0	0.00313426	0.0062101	0.00598209	0	0	0	0	0	0	0.00119949	0.00123624	0.00127581	0.00126646	0.00144874	0.00154112	0.00148405	0	0	0	0
153	neg_2238	Simple ID	Other possible annotated peaks for this cluster.	2	neg	2238	24.761	437.289	[M-H]-	generic	C25H42O6	Anisodorin 4;(+)-Anisodorin 4	7.6248	7.6248	Unknown	3	15	437.289	[M-H]-	438.298	0.0016626	4.54	Isocopalane and spongiane diterpenoids	DQLJXHAJXQDQAP-BSRWFAKKNA-N	O=C(OC(CO)COC(=O)C1C(O)(C)CCC2C1(C)CCC3C(C)(C)CCCC32C)C	KNApSAcK=C00049356,UNPD=UNPD189160,COCONUT=CNP0160779	0	0	0	0	0	0	0	0	0	0	0	0	0.000462325	0.000512518	0.000507398	0.000495149	0	0	0	0.00625855	0.00225255	0.00674688	0
154	neg_2588	Simple ID		1	neg	2588	10.074	484.143	[M-H]-	generic	C25H27NO7S	Ketotifen-N-glucuronide	4.9707	4.9707	Unknown	3	28	484.143	[M-H]-	485.151	0.0008468	3.389	N-glucuronides	WLTPAELNPGRIGG-AQTBWJFINA-N	O=C([O-])C1OC(C(O)C(O)C1O)[N+]2(C)CCC(=C3C=4C=CSC4C(=O)CC=5C=CC=CC35)CC2	HMDB=HMDB0060596,Urine=HMDB0060596,Serum=HMDB0060596	0	0.00031096	0	0.000329377	0.000237921	0	0.000724124	0.000519177	0	0.000676152	0.000366303	0.000700009	0	0.000411714	0.000437306	0.000425824	0.000314399	0.000224713	0.000237663	0.000769178	0.00226329	0.000794991	0
155	neg_260	Simple ID		1	neg	260	14.804	200.129	[M-H]-	generic	C10H19NO3	UNPD143109	7.2121	7.2121	Unknown	3	21	200.129	[M-H]-	201.136	0.000417	4.237	Alpha amino acids	AHQFCPOIMVMDEZ-JCGYYUSDNA-N	O=C(O)C(NC)C(O)C(C)CC=CC	UNPD=UNPD143109,BLEXP=BLEXPDB00011769539,COCONUT=CNP0154408	0.00325882	0.00352215	0.00317776	0.000380296	0.000231879	0.000276023	0	0	0	0.00360375	0.00315355	0.00750106	0.0016473	0.00135208	0.00146121	0.00142878	0.00110411	0.00144968	0.00100543	0.0039339	0.00182807	0.00522267	0
156	neg_2611	Simple ID	Other possible annotated peaks for this cluster.	2	neg	2611	24.965	487.307	[M-H]-	generic	C29H44O6	antcin K	6.6026	6.6026	Unknown	3	29	487.307	[M-H]-	488.314	-0.0005873	3.58	Trihydroxy bile acids, alcohols and derivatives	RWTLLOHEXIZDCG-DPJXPMRRNA-N	O=C(O)C(C(=C)CCC(C)C1CCC2C3=C(C(=O)CC21C)C4(C)CCC(O)C(O)(C)C4CC3O)C	ChEBI=CHEBI:70313,UNPD=UNPD149017;UNPD222818,BLEXP=BLEXPDB00053321283,COCONUT=CNP0193414	0.00148097	0.00173731	0.00159983	0	0	0	0.00257188	0.00315318	0.00273651	0	0	0	0.000549116	0.000585962	0.000614989	0.000594174	0	0	0	0	0	0	0
157	neg_2616	Simple ID		3	neg	2616	20.691	488.294	[M+FA-H]-	generic	C18H37N9O4	UNPD220204	5.7144	5.7144	Unknown	3	40	488.294	[M+FA-H]-	443.297	0.0012532	3.138	Oligopeptides	XEPSCVXTCUUHDT-AVGNSLFASA-N	O=C(O)C(NC(=O)C(NC(=O)C(N)CCCNC(=N)N)CCCNC(=N)N)CC(C)C	UNPD=UNPD220204,COCONUT=CNP0122359	0	0	0	0	0.000348782	0.00026127	0	0	0	0	0	0	0.000629973	0.000705201	0.000718958	0.000695897	0.00262139	0.00479457	0.00286081	0	0	0	0
158	neg_2617	Simple ID		4	neg	2617	20.226	488.294	[M+FA-H]-	generic	C18H37N9O4	UNPD220204	4.668	4.668	Unknown	3	18	488.294	[M+FA-H]-	443.297	0.0009532	2.799	Oligopeptides	XEPSCVXTCUUHDT-AVGNSLFASA-N	O=C(O)C(NC(=O)C(NC(=O)C(N)CCCNC(=N)N)CCCNC(=N)N)CC(C)C	UNPD=UNPD220204,COCONUT=CNP0122359	0	0	0	0	0	0	0	0	0	0	0	0	0.000771387	0.000849182	0.000864915	0.00088607	0.00343896	0.00564412	0.00341667	0	0	0	0
159	neg_2627	Simple ID		1	neg	2627	14.886	490.132	[M-H]-	generic	C27H25NO6S	3-benzyl-4-methyl-2-oxo-2H-chromen-7-yl 3-(4-methylbenzenesulfonamido)propanoate	4.9339	4.9339	Unknown	3	29	490.132	[M-H]-	491.14	0.0012821	3.18	Coumarins and derivatives	XNBDXQYTGBJYRC-UHFFFAOYSA-N	O=C1OC=2C=C(OC(=O)CCNS(=O)(=O)C3=CC=C(C=C3)C)C=CC2C(=C1CC=4C=CC=CC4)C	COCONUT=CNP0251426	0.000913502	0.000989345	0.00101938	0	0	0	0.00118588	0.00168541	0.00143415	0	0	0	0.000770175	0.000688747	0.000745298	0.000763545	0.000175937	0	0	0.000647723	0.00120959	0.00055629	0
160	neg_2635	Unknown compound		1	neg	2635	14.471	491.248	[M-H]-																		0.000782923	0.00079854	0.000682476	0.000547982	0.000556017	0.000548076	0	0	0	0.0016758	0.00174193	0.00151949	0.000544334	0.000535575	0.000584031	0.000602517	0.000377767	0.000339079	0.000394572	0.0013796	0.00103834	0.00153606	0
161	neg_2656	Simple ID		1	neg	2656	14.983	496.175	[M-H]-	generic	C22H31N3O8S	2-amino-4-({1-[(carboxymethyl)carbamoyl]-2-{[1-(3-hydroxy-6,7-dihydro-2-benzofuran-1-yl)butyl]sulfanyl}ethyl}carbamoyl)butanoic acid	5.1191	5.1191	Unknown	3	31	496.175	[M-H]-	497.183	0.0005095	3.556	Oligopeptides	QLCFQNWJLTUZGS-UHFFFAOYSA-N	O=C(O)CNC(=O)C(NC(=O)CCC(N)C(=O)O)CSC(C=1OC(O)=C2C=CCCC21)CCC	COCONUT=CNP0096798	0	0	0	0	0.000157749	0	0	0	0	0	0	0	0.000819404	0.00062686	0.000678098	0.000699901	0.000633336	0.000396248	0.000462989	0.00263947	0.00331046	0.00205387	0
162	neg_2689	Unknown compound		1	neg	2689	24.369	501.269	[M-H]-																		0.00105963	0.000973383	0.000717005	0	0	0	0.00322083	0.00527541	0.00477993	0	0	0	0.000732008	0.000785254	0.000756036	0.000734227	0	0	0	0	0	0	0
163	neg_2690	Unknown compound		1	neg	2690	15.373	501.269	[M-H]-																		0.00382501	0.00380948	0.00374232	0.0021449	0.00229466	0.00227763	0.00707215	0.00765849	0.0082532	0.00440893	0.00480255	0.00425285	0.00374174	0.00394496	0.00377424	0.00382609	0.001994	0.00171349	0.00187464	0.00308295	0.00221415	0.00402357	0
164	neg_2692	Simple ID	Other possible annotated peaks for this cluster.	5	neg	2692	21.083	502.312	[M+FA-H]-	generic	C23H43N3O6	methyl 2-[2-(2-{[(tert-butoxy)carbonyl]amino}-4-methylpentanamido)-4-methylpentanamido]-3-methylbutanoate	5.6673	5.6673	Unknown	3	22	502.312	[M+FA-H]-	457.315	0.0013886	3.643	Oligopeptides	WAJQVCFLOCAXOP-UHFFFAOYSA-N	O=C(OC(C)(C)C)NC(C(=O)NC(C(=O)NC(C(=O)OC)C(C)C)CC(C)C)CC(C)C	COCONUT=CNP0290065	0	0	0	0	0	0	0	0	0	0	0	0	0.00454044	0.00493772	0.00520613	0.00525061	0.0169953	0.0272416	0.0190264	0	0	0	0
165	neg_2693	Simple ID	Other possible annotated peaks for this cluster.	4	neg	2693	21.507	502.312	[M+FA-H]-	generic	C23H43N3O6	methyl 2-[2-(2-{[(tert-butoxy)carbonyl]amino}-4-methylpentanamido)-4-methylpentanamido]-3-methylbutanoate	5.7283	5.7283	Unknown	3	17	502.312	[M+FA-H]-	457.315	0.0010886	3.703	Oligopeptides	WAJQVCFLOCAXOP-UHFFFAOYSA-N	O=C(OC(C)(C)C)NC(C(=O)NC(C(=O)NC(C(=O)OC)C(C)C)CC(C)C)CC(C)C	COCONUT=CNP0290065	0	0	0	0	0	0	0	0	0	0	0	0	0.0031811	0.00330905	0.00346778	0.00347598	0.0139847	0.0216575	0.0151722	0	0	0	0
166	neg_2708	Unknown compound		1	neg	2708	16.447	506.154	[M-H]-																		0	0	0	0	0	0	0	0	0	0.0017013	0.000786836	0	0.000330115	0.000267737	0.000284914	0.000287379	0	0	0	0.00246952	0.00136717	0.00336446	0
167	neg_2712	Simple ID		1	neg	2712	12.363	506.251	[M-H]-	generic	C26H41N3O3S2	2-amino-17'-(hydroxymethyl)-18'-(3-hydroxypropyl)-2'-methyl-5,6-dihydro-1H-5',6'-dithiaspiro[pyrimidine-4,8'-tetracyclo[10.6.2.0?,??.0?,??]icosan]-12'-en-20'-one	4.5168	4.5168	Unknown	3	20	506.251	[M-H]-	507.259	0.0009577	2.836	Hydropyrimidines	YFHDVSHFUHVTQM-UHFFFAOYSA-N	O=C1C2=C3CC4CC(CO)C(CCCO)C3(C1)C4(C)CCSSCC5(N=C(N)NCC5)CCC2	COCONUT=CNP0422033	0	0	0	0	0	0	0	0	0	0	0	0	0.000514702	0.000591556	0.000601372	0.000581697	0	0	0	0	0	0	0
168	neg_2722	Simple ID		1	neg	2722	12.385	510.157	[M-H]-	generic	C27H29NO7S	2-[2-({8,8-dimethyl-2-oxo-4-phenyl-2H,8H,9H,10H-pyrano[2,3-h]chromen-5-yl}oxy)acetamido]-4-(methylsulfanyl)butanoic acid	5.3813	5.3813	Unknown	3	37	510.157	[M-H]-	511.166	0.0018968	3.288	Prenylated neoflavonoids	WURDIOVTQJGRBW-UHFFFAOYSA-N	O=C1OC2=C(C(OCC(=O)NC(C(=O)O)CCSC)=CC=3OC(C)(C)CCC32)C(=C1)C=4C=CC=CC4	COCONUT=CNP0103474	0	0	0	0.000244654	0	0.000233965	0.000621414	0.000594918	0.000514076	0	0	0	0.000415743	0.000352941	0.000373387	0.000331026	0.000395144	0.000270813	0.000277242	0.000856954	0.00116912	0.000406287	0
169	neg_2443	Simple ID	Other possible annotated peaks for this cluster.	2	neg	2443	26.555	465.323	[M-H]-	generic	C27H46O6	Certonardosterol A4	7.4817	7.4817	Unknown	3	9	465.323	[M-H]-	466.329	-0.0009373	4.746	Cholesterols and derivatives	CGVAZDBZAZTTNH-LWZTYCQZNA-N	OC(C)C(C=CC(C)C1CC(O)C2C3(O)CC(O)C4C(O)C(O)CCC4(C)C3CCC12C)C	KNApSAcK=C00043367,UNPD=UNPD121032,COCONUT=CNP0207460	0	0	0	0	0	0	0	0.000849453	0.000999447	0	0	0	0.000400525	0.000434924	0.000439687	0.000446755	0	0	0	0	0	0	0
170	neg_1468	Simple ID	Other possible annotated peaks for this cluster.	8	neg	1468	22.247	333.207	[M-H]-	generic	C20H30O4	Prostaglandin B2	7.8757	7.8757	Unknown	3	31	333.207	[M-H]-	334.214	0.000233	4.451	Prostaglandins and related compounds	PRFXRIUZNKLRHM-RYPCXPIFSA-N	O=C(O)CCCC=CCC=1C(=O)CCC1C=CC(O)CCCCC	HMDB=HMDB0004236,ChEBI=CHEBI:28099;CHEBI:93453;CHEBI:133391,DrugBank=DB02304,SMPDB=PW_C002099,FooDB=FDB003671;FDB023342,BMDB=BMDB04236,LipidMAPS=LMFA03010018,CSF=HMDB0004236,Serum=HMDB0004236,PubChem=5280881,UNPD=UNPD151716,BLEXP=BLEXPDB00005280881,COCONUT=CNP0346263	0	0	0	0	0	0	0	0	0	0	0	0	0.00603995	0.00629732	0.00650578	0.00652385	0.0213789	0.0218198	0.02298	0	0	0	0
171	neg_2714	Simple ID		4	neg	2714	21.83	506.3	[M-H]-	generic	C25H41N5O6	Syringolin D	5.1257	5.1257	Unknown	3	35	506.3	[M-H]-	507.306	-0.0012924	3.069	Cyclic peptides	XQCDUALOSDLZKD-SIBMFBDYSA-N	O=C1C=CC(NC(=O)C(C=CCCN1)NC(=O)C(NC(=O)NC(C(=O)O)C(C)CC)C(C)C)C(C)C	NPA=NPA004227,COCONUT=CNP0118173	0	0	0	0	0	0	0	0	0	0	0	0	0.00951603	0.00917102	0.00916075	0.00901433	0.0153476	0.017933	0.0181127	0	0	0	0
172	neg_2794	Unknown compound		2	neg	2794	20.814	527.345	[M-H]-																		0	0	0	0.00194241	0.0019949	0.00260783	0	0	0	0	0	0	0.000395803	0.000481395	0.000473136	0.000462673	0	0	0	0	0	0	0
173	neg_2845	Simple ID		1	neg	2845	22.012	541.357	[M-H]-	generic	C34H46N4O2	N-{5-cyclohexyl-1,5-dihydroxy-8-[3-(1H-indol-2-yl)prop-1-en-2-yl]tricyclo[6.5.2.0?,??]pentadec-10-yn-12-yl}-N'-methylguanidine	4.7047	4.7047	Unknown	3	54	541.357	[M-H]-	542.362	-0.0026997	2.852	Sesquiterpenoids	VIHAPDWZKRGGML-UHFFFAOYSA-N	N=C(NC)NC1C#CCC2(C(=C)CC3=CC=4C=CC=CC4N3)CCC(O)(C5CCCCC5)C6CCC(O)(C1)C6C2	COCONUT=CNP0087663	0	0	0	0	0	0	0	0	0	0	0	0	0.00339864	0.0038285	0.00377352	0.00384555	0	0	0	0	0	0	0
174	neg_2849	Unknown compound		1	neg	2849	18.824	543.34	[M-H]-																		0	0	0	0.00142052	0.00211643	0.00221894	0	0	0	0	0	0	0.000394946	0.000446187	0.000456003	0.000438064	0	0	0	0	0	0	0
175	neg_2859	Simple ID		1	neg	2859	9.591	549.229	[M-H]-	generic	C24H34N6O9	Glu-Phe-Gln-Gln	5.4814	5.4814	Unknown	3	58	549.229	[M-H]-	550.239	0.0025502	3.204	Oligopeptides	WZAYJXZPSJOXCP-QAETUUGQSA-N	O=C(O)CCC(N)C(=O)NC(C(=O)NC(C(=O)NC(C(=O)O)CCC(=O)N)CCC(=O)N)CC=1C=CC=CC1	ChEBI=CHEBI:73488	0	0	0	0.00103844	0.000813077	0	0.00360544	0.00134942	0.00120858	0.00972307	0.0061797	0.0166254	0.00227548	0.00272943	0.00273157	0.00261665	0	0	0	0.0120858	0.0102951	0.013479	0
176	neg_2894	Simple ID		1	neg	2894	14.312	556.311	[M-H]-	generic	C29H43N5O6	Sativanine H	4.8943	4.8943	Unknown	3	44	556.311	[M-H]-	557.321	0.0027576	2.738	Oligopeptides	URPCMBHACJYYHP-ZRDIBKRKNA-N	O=C1NC=CC=2C=C(OC3CCN(C(=O)C(N(C)C)CC(=O)CN(C)C)C3C(=O)NC1CC(C)C)C=CC2OC	KNApSAcK=C00028972,COCONUT=CNP0426189	0	0	0	0	0	0	0	0	0	0	0	0	0.000353412	0.000316611	0.000350205	0.000342534	0	0	0	0	0	0	0
177	neg_2902	Simple ID		1	neg	2902	20.082	557.352	[M-H]-	generic	C34H46N4O3	N-{9,17-dihydroxy-3-[3-(1H-indol-2-yl)prop-1-en-2-yl]-17-methyltetracyclo[10.4.1.0?,??.0?,??]heptadec-5-yn-7-yl}-N''-(3-hydroxypropyl)-N'-methylguanidine	5.1199	5.1199	Unknown	3	71	557.352	[M-H]-	558.357	-0.0022851	2.905	Sesquiterpenoids	FCYINWZZMUAORL-UHFFFAOYSA-N	OCCCN=C(NC)NC1C#CCC2(C(=C)CC3=CC=4C=CC=CC4N3)CC5CCC2C6C(CCC6(O)C1)C5(O)C	COCONUT=CNP0104937	0	0	0	0.012489	0.014747	0.0160052	0	0	0	0	0	0	0.00488231	0.00514592	0.00551915	0.0054551	0	0	0	0	0	0	0
178	neg_2903	Simple ID		1	neg	2903	19.471	557.352	[M-H]-	generic	C34H46N4O3	N-{9,17-dihydroxy-3-[3-(1H-indol-2-yl)prop-1-en-2-yl]-17-methyltetracyclo[10.4.1.0?,??.0?,??]heptadec-5-yn-7-yl}-N''-(3-hydroxypropyl)-N'-methylguanidine	5.1065	5.1065	Unknown	3	62	557.352	[M-H]-	558.357	-0.0024851	3.069	Sesquiterpenoids	FCYINWZZMUAORL-UHFFFAOYSA-N	OCCCN=C(NC)NC1C#CCC2(C(=C)CC3=CC=4C=CC=CC4N3)CC5CCC2C6C(CCC6(O)C1)C5(O)C	COCONUT=CNP0104937	0	0	0	0.00107974	0.00159375	0.00175124	0	0	0	0	0	0	0.000378262	0.000418459	0.000419986	0.000443666	0	0	0	0	0	0	0
179	neg_2904	Simple ID		1	neg	2904	9.872	558.18	[M-H]-	generic	C31H30ClN3O5	9-(2-chlorophenyl)-2-methyl-4-[(3,4,5-trimethoxyphenyl)methyl]-4,7,17-triazatetracyclo[8.7.0.0?,?.0??,??]heptadeca-1(10),11,13,15-tetraene-3,6-dione	4.7138	4.7138	Unknown	3	24	558.18	[M-H]-	559.187	0.0002223	2.995	Beta carbolines	WUSIPMSSDBFDLU-UHFFFAOYSA-N	O=C1N2CC(C=3C=CC=CC3Cl)C=4C=5C=CC=CC5NC4C2(C(=O)N(CC6=CC(OC)=C(OC)C(OC)=C6)C1)C	COCONUT=CNP0369642	0	0.000303018	0	0.000405352	0.000231809	0	0.00113927	0.000899488	0.000838224	0.0005815	0.000279037	0.000723427	0.00056862	0.000546389	0.000567467	0.000552042	0.000447504	0.000335139	0.00035242	0.00132321	0.00276609	0.00112757	0
180	neg_2914	Simple ID		1	neg	2914	38.462	560.336	[M-H]-	generic	C28H52NO8P	{2-hydroxy-3-[(2-methoxy-12-methyloctadeca-7,17-dien-5-ynoyl)oxy]propoxy}[2-(trimethylamino)ethoxy]phosphinic acid	5.6553	5.6553	Unknown	3	18	560.336	[M-H]-	561.343	7.78e-05	3.586	Monosaccharide phosphates	CUZXRKBHOVYBPP-UHFFFAOYSA-N	O=C(OCC(O)COP(=O)(O)OCCN(C)(C)C)C(OC)CCC#CC=CCCCC(C)CCCCC=C	COCONUT=CNP0017830	0	0	0	0	0	0	0	0	0	0	0	0	0	0	0.000422725	0	0.000238275	0.000172079	0.000175769	0	0	0	0
181	neg_2946	Unknown compound		1	neg	2946	10.521	569.253	[M-H]-																		0	0	0	0	0	0	0	0	0	0.00385499	0.00232109	0.00783887	0.000339457	0.000376097	0.000375559	0.000363034	0	0	0	0.000673777	0.000340824	0.00160907	0
182	neg_2958	Unknown compound		1	neg	2958	17.038	573.349	[M-H]-																		0	0	0	0.00448364	0.00765191	0.00695375	0	0	0	0	0	0	0.00216851	0.00240418	0.00237841	0.00246289	0	0	0	0	0	0	0
183	neg_2964	Unknown compound		1	neg	2964	22.036	575.321	[M-H]-																		0	0	0	0.00210948	0.00267441	0.00264645	0	0	0	0	0	0	0.000404438	0.000454959	0.0004665	0.000454238	0	0	0	0	0	0	0
184	neg_2981	Simple ID		1	neg	2981	9.995	581.253	[M-H]-	generic	C32H34N6O5	N-[(2S,3R)-5-[(2R)-1-hydroxypropan-2-yl]-3-methyl-2-[[methyl-[(1-naphthalenylamino)-oxomethyl]amino]methyl]-6-oxo-3,4-dihydro-2H-1,5-benzoxazocin-10-yl]-2-pyrazinecarboxamide	5.4983	5.4983	Unknown	3	109	581.253	[M-H]-	582.259	-0.0008083	3.069	Naphthalenes	ANSOEJOLTGHKQD-JJKLZOQUNA-N	O=C(NC1=CC=CC=2C(=O)N(CC(C)C(OC12)CN(C(=O)NC3=CC=CC=4C=CC=CC43)C)C(C)CO)C5=NC=CN=C5	ChEBI=CHEBI:124206;CHEBI:124522;CHEBI:124545	0	0	0	0	0	0	0	0	0	0	0.00290091	0.00681464	0.000333879	0.000349145	0.000368925	0.000359795	0	0	0	0	0	0.00104297	0
185	neg_299	Simple ID		1	neg	299	22.443	207.139	[M-H]-	generic	C13H20O2	3-Hydroxy-beta-ionone	5.2872	5.2872	Unknown	3	24	207.139	[M-H]-	208.146	0.0002534	3.101	Sesquiterpenoids	HFRZSVYKDDZRQY-AATRIKPKNA-N	O=C(C=CC1=C(C)CC(O)CC1(C)C)C	HMDB=HMDB0036821,KNApSAcK=C00022191,ChEBI=CHEBI:53173,FooDB=FDB001764;FDB015769,PubChem=5363700,PlantCyc=CPD-7200,UNPD=UNPD104518;UNPD136136,COCONUT=CNP0199089	0	0	0	0	0	0	0	0	0	0	0	0	0.000412116	0.00046901	0.000462781	0.000488107	0	0	0	0	0	0	0
186	neg_2997	Simple ID		1	neg	2997	11.188	585.271	[M-H]-	generic	C33H38N4O6	(2R,3Z)-phycocyanobilin	6.1782	6.1782	Unknown	3	54	585.271	[M-H]-	586.279	0.0005585	3.937	Tetrapyrroles and derivatives	XAVVMXGLKJSJDU-YGXRAJTHNA-N	O=C(O)CCC=1C(N=C(C=C2NC(=O)C(C2=CC)C)C1C)=CC=3NC(C=C4NC(=O)C(=C4C)CC)=C(C3CCC(=O)O)C	ChEBI=CHEBI:15617;CHEBI:48863;CHEBI:47955;CHEBI:47957;CHEBI:57437;CHEBI:85275,PlantCyc=3Z-PHYCOCYANOBILIN,UNPD=UNPD207759;UNPD51920;UNPD224179,COCONUT=CNP0276599	0	0	0	0	0	0	0	0	0	0	0	0	0.000422249	0.000417713	0.000435795	0.000433119	0	0	0	0	0	0	0
187	neg_3008	Simple ID		1	neg	3008	21.452	590.314	[M-H]-	generic	C35H45NO7	4-{4-hydroxy-7-[4-hydroxy-3-(3-methylcyclohexyl)phenyl]-octahydro-2H-1-benzopyran-2-yl}-3-(hydroxymethyl)-6-methoxy-5-[(1H-pyrrol-3-yl)methyl]benzene-1,2-diol	5.5778	5.5778	Unknown	3	36	590.314	[M-H]-	591.32	-0.0012737	3.406	Linear diarylheptanoids	SZNJCOFZXHCYLA-UHFFFAOYSA-N	OC1=CC=C(C=C1C2CCCC(C)C2)C3CCC4C(O)CC(OC4C3)C=5C(=C(O)C(O)=C(OC)C5CC=6C=CNC6)CO	COCONUT=CNP0266930	0.00117938	0.000862605	0.000949236	0	0	0	0.000719835	0.000992961	0.000981406	0	0	0	0.000340244	0.00037398	0.000390852	0.000371173	0	0	0	0	0	0	0
188	neg_2890	Simple ID		2	neg	2890	18.643	555.337	[M-H]-	generic	C34H44N4O3	N-{6,10-dihydroxy-1-[3-(1H-indol-2-yl)prop-1-en-2-yl]tetracyclo[8.5.2.1?,?.0?,??]octadec-3-en-13-yn-12-yl}-N''-(3-hydroxypropyl)-N'-methylguanidine	5.9539	5.9539	Unknown	3	28	555.337	[M-H]-	556.341	-0.0027352	3.219	Sesquiterpenoids	YGQGRRVJVQGODY-UHFFFAOYSA-N	OCCCN=C(NC)NC1C#CCC2(C(=C)CC3=CC=4C=CC=CC4N3)CC5C(CCC5(O)C1)C6(O)CC=CC2C6	COCONUT=CNP0193021	0	0	0	0.00144534	0.00206702	0.00200938	0	0	0	0	0	0	0.000483179	0.000505463	0.000530262	0.000487475	0	0	0	0	0	0	0
189	neg_3013	Unknown compound		1	neg	3013	19.79	591.315	[M-H]-																		0	0	0	0.00163709	0.00287118	0.00246994	0	0	0	0	0	0	0.00061856	0.000691295	0.000709868	0.000716048	0	0	0	0	0	0	0
190	neg_3043	Simple ID		1	neg	3043	13.124	599.212	[M-H]-	generic	C31H36O12	Decipinin A;(+)-Decipinin A	5.8901	5.8901	Unknown	3	41	599.212	[M-H]-	600.221	0.0011001	4.034	Tetracarboxylic acids and derivatives	BNUGSCJDRYIKLJ-UTQSGCHWNA-N	O=C(OC1C2=CC(=O)C(OC(=O)C)(C(=O)C2=COC31OC(C)CCC3OC(=O)CCC(=O)O)C)C=CC=CC=CCCC	KNApSAcK=C00045832,UNPD=UNPD64149,NPA=NPA007417,COCONUT=CNP0245507	0.00203569	0.00206052	0.00211209	0	0	0	0	0	0	0	0	0	0.000444478	0.00037956	0.00040727	0.000414231	0	0	0	0	0	0	0
191	neg_2876	Simple ID	Other possible annotated peaks for this cluster.	3	neg	2876	12.654	553.237	[M-H]-	generic	C22H42N4O8S2	D-Pantethine	7.4348	7.4348	Unknown	3	36	553.237	[M-H]-	554.244	-7.01e-05	4.272	Beta amino acids and derivatives	DJWYOLJPSHDSAL-ROUUACIJSA-N	O=C(NCCSSCCNC(=O)CCNC(=O)C(O)C(C)(C)CO)CCNC(=O)C(O)C(C)(C)CO	HMDB=HMDB0003828,ChEBI=CHEBI:31959,FooDB=FDB023231,STOFF=STOFF_295,BMDB=BMDB03828,UNPD=UNPD66131,BLEXP=BLEXPDB00000004677,COCONUT=CNP0308579	0.000412678	0.000382515	0.000398063	0.00212113	0.00168006	0.00174905	0.00139894	0.00123932	0.00124853	0.00145018	0.00128069	0.00114508	0.00131773	0.00114611	0.00113604	0.00112001	0.000525562	0.000271838	0.00041628	0.00709245	0.00464696	0.00158038	0
192	neg_305	Simple ID		1	neg	305	19.158	208.097	[M-H]-	generic	C11H15NO3	3-(cyclohexa-1,4-dien-1-yl)-2-[(1-hydroxyethylidene)amino]propanoic acid	4.8649	4.8649	Unknown	3	31	208.097	[M-H]-	209.105	0.0005169	3.015	N-acyl-alpha amino acids	SCLFGHMBABLYAD-UHFFFAOYSA-N	O=C(O)C(N=C(O)C)CC1=CCC=CC1	COCONUT=CNP0332115	0.000510052	0.000520996	0.000515528	0	0.000187735	0.000176111	0.000495902	0.000530914	0.000549007	0.000464804	0.00045285	0.000481428	0.000348341	0.000365267	0.000367531	0.000387176	0.000277576	0.000201337	0.000238396	0.000472863	0.000385081	0.000608735	0.000250894
193	neg_3058	Simple ID		1	neg	3058	32.887	604.461	[M-H]-	generic	C36H63NO6	N-octadecyldispiro[cyclohexane-1,4'-[3,5,7,10,12]pentaoxatricyclo[7.3.0.0?,?]dodecane-11',1''-cyclohexane]-8'-carboxamide	5.185	5.185	Unknown	3	41	604.461	[M-H]-	605.466	-0.0026377	2.924	Dioxolopyrans	RARPEMFVVRDJSW-UHFFFAOYSA-N	O=C(NCCCCCCCCCCCCCCCCCC)C1OC2OC3(OC2C4OC5(OC14)CCCCC5)CCCCC3	COCONUT=CNP0366225	0	0	0	0	0	0	0	0	0	0	0	0	0	0	0	0.00116058	0	0	0	0	0	0.000694299	0.00140368
194	neg_3087	Simple ID		1	neg	3087	11.966	615.193	[M-H]-	generic	C27H36O16	UNPD113580	5.4194	5.4194	Unknown	3	54	615.193	[M-H]-	616.2	-0.0003414	3.415	Oligosaccharides	RRUDRVGYNLUFRK-KXGCETFANA-N	OC1=CC=C(OC2OC(COC3OCC(OC4OCC(O)C(O)C4O)C(O)C3O)C(O)C(O)C2O)C=5C(O)=CC(=CC15)C	UNPD=UNPD113580,COCONUT=CNP0146510	0	0	0	0.000586351	0.000404784	0	0	0	0	0.000567282	0	0	0.000369792	0.000269448	0.000296761	0.000310429	0	0	0	0.000825845	0.0010577	0	0
195	neg_3094	Simple ID		1	neg	3094	38.429	616.461	[M-H]-	generic	C34H67NO6S	UNPD161467	6.2997	6.2997	Unknown	3	26	616.461	[M-H]-	617.469	0.0003334	3.423	N-acyl amines	YPDRPLLLEHXCJA-RGPBEBJRNA-N	O=C(NC(CS(=O)(=O)O)C(O)C=CCCCCCCCCCC(C)C)CC(O)CCCCCCCCCCCC(C)C	UNPD=UNPD161467,NPA=NPA019818,COCONUT=CNP0261939	0	0	0	0.000493965	0.000264597	0.000171335	0.000785939	0.00110322	0.00201446	0	0	0	0.000397914	0.00155554	0.000661063	0.00209645	0.000318901	0.000200958	0.000191041	0.000410793	0.000411105	0.00133489	0.00225527
196	neg_3097	Simple ID		1	neg	3097	32.835	616.462	[M-H]-	generic	C34H67NO6S	UNPD161467	6.4689	6.4689	Unknown	3	26	616.462	[M-H]-	617.469	0.0001334	3.503	N-acyl amines	YPDRPLLLEHXCJA-RGPBEBJRNA-N	O=C(NC(CS(=O)(=O)O)C(O)C=CCCCCCCCCCC(C)C)CC(O)CCCCCCCCCCCC(C)C	UNPD=UNPD161467,NPA=NPA019818,COCONUT=CNP0261939	0	0	0	0.00175427	0	0	0.0020145	0	0	0	0	0	0	0.00546317	0.00240743	0.00671177	0.00114718	0.000696492	0	0.00135636	0	0.00388036	0.00858817
197	neg_313	Simple ID		1	neg	313	22.717	209.118	[M-H]-	generic	C12H18O3	Jasmonic acid	8.8414	8.8414	Unknown	3	29	209.118	[M-H]-	210.126	0.000118	5	Jasmonic acids	ZNJFBWYDHIGLCU-AVDNRZGUNA-N	O=C(O)CC1CCC(=O)C1CC=CCC	HMDB=HMDB0032797,KNApSAcK=C00000218;C00000446;C00049053,ChEBI=CHEBI:18292;CHEBI:18435;CHEBI:58431;CHEBI:136179;CHEBI:136184;CHEBI:138625;CHEBI:139300,FooDB=FDB015493;FDB021719;FDB030070;FDB030077,LipidMAPS=LMFA02020001;LMFA02020003;LMFA02020004;LMFA02020017,PubChem=7251183;7251182;7251181;5281166,PlantCyc=CPD-734;CPD-731;CPD-5943,UNPD=UNPD139120;UNPD152425;UNPD160716,BLEXP=BLEXPDB00000105087,NPA=…	0	0	0	0.00755718	0.0058994	0.00564062	0	0	0	0.00100923	0.0014038	0.00175285	0.00178069	0.00183499	0.00191833	0.00183846	0.00115906	0.000702754	0.00125485	0.00220543	0.00164579	0.00115681	0.00111187
198	neg_3147	Unknown compound		1	neg	3147	21.59	639.433	[M-H]-																		0	0	0	0	0	0	0	0	0	0	0	0	0.000357117	0.00045461	0.000465532	0.000453081	0	0	0	0	0	0	0
199	neg_3156	Unknown compound		1	neg	3156	14.448	642.278	[M-H]-																		0.00294966	0.00431635	0.00240951	0.00528289	0.00492372	0.00479879	0	0	0	0.00268219	0.00222449	0.00179796	0.00391179	0.00397245	0.00410734	0.00412358	0.00628987	0.00535811	0.00541251	0.000673677	0.000592789	0.00259102	0
200	neg_3168	Simple ID		1	neg	3168	10.598	646.28	[M-H]-	generic	C32H45N3O9S	(13R)-S-glutathionyl-(14S)-hydroxy-(4Z,7Z,9E,11E,16Z,19Z)-docosahexaenoate(2-)	6.0701	6.0701	Unknown	3	66	646.28	[M-H]-	647.288	0.0001746	3.633	Oligopeptides	NWYKIASJHFGEAN-CPMAONNBSA-L	O=C([O-])CNC(=O)C(NC(=O)CCC(C(=O)[O-])[NH3+])CSC(C=CC=CC=CCC=CCCC(=O)[O-])C(O)CC=CCC=CCC	ChEBI=CHEBI:137407;CHEBI:138202,COCONUT=CNP0081739	0	0	0	0	0	0	0	0	0	0.00213649	0.00126678	0.00160481	0.000384951	0.000430022	0.000417359	0.000393295	0	0	0	0.00280961	0.0028138	0.00316849	0
201	neg_3182	Simple ID		1	neg	3182	12.095	650.39	[M-H]-	generic	C31H53N7O8	2-({1-[2-({1-[2-(2-amino-3-methylbutanamido)-4-methylpentanoyl]pyrrolidin-2-yl}formamido)-3-methylbutanoyl]pyrrolidin-2-yl}formamido)-4-carbamoylbutanoic acid	5.49	5.49	Unknown	3	105	650.39	[M-H]-	651.396	-0.0017148	3.165	Oligopeptides	KSIHMACFIAFKIG-UHFFFAOYSA-N	O=C(N)CCC(NC(=O)C1N(C(=O)C(NC(=O)C2N(C(=O)C(NC(=O)C(N)C(C)C)CC(C)C)CCC2)C(C)C)CCC1)C(=O)O	COCONUT=CNP0193947	0	0	0	0	0	0	0	0	0	0	0	0	0.00302846	0.00279013	0.00282245	0.00276851	0	0	0	0	0	0	0
202	neg_3188	Unknown compound		1	neg	3188	37.182	651.492	[M-H]-																		0	0	0	0	0	0.000299865	0.00101309	0.00101835	0.00106427	0	0	0	0	0.000360673	0	0	0	0	0	0	0	0	0
203	neg_3189	Unknown compound		1	neg	3189	37.092	651.492	[M-H]-																		0.000416321	0.000440692	0	0.000329585	0.000836826	0	0	0	0	0	0.000289431	0	0.000436306	0	0.000416596	0.000419794	0.000555548	0.00092501	0.000945791	0	0	0	0
204	neg_3199	Unknown compound		1	neg	3199	21.786	653.446	[M-H]-																		0	0	0	0	0	0	0	0	0	0	0	0	0.000400667	0.000446009	0.000499329	0.000492281	0	0	0	0	0	0	0
205	neg_3208	Unknown compound		1	neg	3208	10.082	656.291	[M-H]-																		0.00109763	0.00119947	0.00113355	0	0.000192975	0	0	0	0	0	0	0	0.000316857	0.00032858	0.000341693	0.000311162	0.000430326	0.00042178	0.000402716	0	0	0	0
206	neg_322	Simple ID		1	neg	322	16.857	211.097	[M-H]-	generic	C11H16O4	(-)-Depudecin;Depudecin	5.3162	5.3162	Unknown	3	15	211.097	[M-H]-	212.105	0.0001825	3.153	Secondary alcohols	DLVJMFOLJOOWFS-FCMCDHKVNA-N	OC(C=C)C1OC1C=CC2OC2C(O)C	KNApSAcK=C00017282,ChEBI=CHEBI:64143;CHEBI:94491;CHEBI:95244,UNPD=UNPD2326,NPA=NPA001465,COCONUT=CNP0116062	0.00035762	0.00029954	0.000347582	0.000267175	0	0.000210667	0.000660853	0.00056889	0.000624475	0.00112246	0.000359871	0	0.000494228	0.000422338	0.000457563	0.000443425	0.000220877	0	0	0.000526772	0.000850172	0.000438281	0.000323048
207	neg_3250	Simple ID		1	neg	3250	14.95	678.345	[M-H]-	generic	C31H49N7O10	UNPD163435	6.3958	6.3958	Unknown	3	56	678.346	[M-H]-	679.354	0.0013143	3.625	Cyclic depsipeptides	DKCJEZWCCJBBSP-MYZKHZNYNA-N	O=C(O)C(CC(=O)N1N=CCCC1C(=O)NC2C(=O)NC(C(=O)NC(C(=O)N3NCCCC3C(=O)OC2)C)CC(C)C)CCCC(O)C	UNPD=UNPD163435,NPA=NPA008525,COCONUT=CNP0144009	0.00173338	0.00147348	0.00132131	0	0	0	0	0	0	0	0	0	0.000312591	0.000339587	0.000340439	0.000329792	0	0	0	0	0	0	0
208	neg_3261	Simple ID		1	neg	3261	11.347	681.357	[M-H]-	generic	C41H50N2O7	20-[(2-aminopyridin-4-yl)methyl]-18-(1,3-dihydroxyheptan-4-yl)-7,14-dihydroxy-8-methoxy-4-phenyltricyclo[14.5.0.0?,??]henicosa-5(10),6,8-trien-2-yne-13,15-dione	5.1903	5.1903	Unknown	3	52	681.357	[M-H]-	682.362	-0.0020745	3.044	Anisoles	HYHOJBWCGZKJAN-UHFFFAOYSA-N	O=C1CCC2=CC(OC)=C(O)C=C2C(C#CC3CC(CC=4C=CN=C(N)C4)CC(CC3C(=O)C1O)C(CCC)C(O)CCO)C=5C=CC=CC5	COCONUT=CNP0359440	0	0	0	0	0	0	0	0	0	0	0	0	0.000433652	0.000409651	0.000439559	0.000419915	0	0	0	0	0	0	0
209	neg_3265	Unknown compound		1	neg	3265	12.897	682.377	[M-H]-																		0	0	0	0	0	0	0	0	0	0	0	0	0.000404778	0.000368405	0.000369967	0.000338947	0	0	0	0	0	0	0
210	neg_3318	Simple ID		1	neg	3318	9.375	705.321	[M-H]-	generic	C42H46N2O8	5-[4-hydroxy-3-(3-hydroxypropyl)-5-methoxyphenyl]-11-(hydroxymethyl)-21-[(1H-indol-5-yl)methyl]-4-[(methylamino)methoxy]-6,12-dioxapentacyclo[12.8.0.0?,?.0?,??.0??,??]docosa-1(14),2(7),8(13),15,17,19-hexaen-18-ol	5.3702	5.3702	Unknown	3	85	705.321	[M-H]-	706.325	-0.00286	3.129	Pyranoflavonoids	DHEFUZNDCTYRHP-UHFFFAOYSA-N	OC=1C=CC=2C3=C4OC(CO)CCC4=C5OC(C6=CC(OC)=C(O)C(=C6)CCCO)C(OCNC)CC5=C3CC(C2C1)CC=7C=CC=8NC=CC8C7	COCONUT=CNP0367743	0	0	0	0	0	0	0	0	0	0.00379168	0.00300238	0.0034673	0	0.000282028	0.000293587	0.000281074	0	0	0	0	0	0.000859829	0
211	neg_334	Simple ID		1	neg	334	22.366	213.15	[M-H]-	generic	C12H22O3	Putaminoxin E	4.8687	4.8687	Unknown	3	25	213.15	[M-H]-	214.157	-0.0003819	2.914	Lactones	PPXGPMYYKWZILB-PQHZJMOTNA-N	O=C1OC(CCC)CCCC(O)CCC1	KNApSAcK=C00044290,UNPD=UNPD75948,NPA=NPA006503,COCONUT=CNP0225950	0	0	0	0	0	0	0	0	0	0	0	0	0	0.000281654	0.000300653	0.000292129	0	0	0	0	0	0	0.00227212
212	neg_3343	Simple ID		1	neg	3343	10.63	713.306	[M-H]-	generic	C40H46N2O10	CNP0428404	5.762	5.762	Unknown	3	89	713.306	[M-H]-	714.315	0.0016692	3.507	1-benzopyrans	BKXNFOBSNPPFNC-UHFFFAOYSA-N	O=CC1=C(OC=2C(=C(OCCCO)C3=C(OC(C3)C(O)(C)C4CCNCC4)C2CO)C1=C5CCC(=O)C(C=6C=CC7=NCC=C7C6)C5)C(=O)OCC	COCONUT=CNP0428404	0.00171486	0.00176475	0.00173646	0.000349464	0.00033421	0.000315479	0	0	0	0	0	0	0.000356035	0.000355255	0.000348259	0.000345426	0	0	0	0	0	0	0
213	neg_1595	Simple ID	Other possible annotated peaks for this cluster.	4	neg	1595	23.179	347.222	[M-H]-	generic	C21H32O4	17alpha,21-Dihydroxypregnenolone	7.6419	7.6419	Unknown	3	30	347.222	[M-H]-	348.23	0.0003831	4.359	21-hydroxysteroids	JNHJGXQUDOYJAK-OGOAYBLUNA-N	O=C(CO)C1(O)CCC2C3CC=C4CC(O)CCC4(C)C3CCC21C	HMDB=HMDB0006762,ChEBI=CHEBI:27832,SMPDB=PW_C002914,FooDB=FDB024065,BMDB=BMDB06762,LipidMAPS=LMST02030141,PubChem=192735,BLEXP=BLEXPDB00000192735,COCONUT=CNP0083544	0.0756794	0.0653528	0.0772205	0	0	0	0.0996935	0.0955969	0.102112	0	0.000278052	0	0.0289689	0.0323992	0.0324865	0.0318951	0	0	0	0	0	0	0
214	neg_336	Simple ID		1	neg	336	15.37	214.05	[M-H]-	generic	C12H9NO3	Robustine;(-)-Rutacridone	4.7087	4.7087	Unknown	3	25	214.05	[M-H]-	215.058	0.0007667	2.849	Furanoquinolines	VGVNNMLKTSWBAR-UHFFFAOYSA-N	OC1=CC=CC2=C1N=C3OC=CC3=C2OC	KNApSAcK=C00002195,ChEBI=CHEBI:8883,UNPD=UNPD36273,COCONUT=CNP0130004	0.000513334	0.000615266	0.000588851	0	0	0	0.00240559	0.00139616	0.00150992	0.000661494	0.000405228	0.000673258	0.000306913	0	0	0	0	0.000159649	0	0	0	0	0
215	neg_3372	Simple ID		1	neg	3372	21.173	724.263	[M-H]-	generic	C38H47NO9S2	2-{3,4-dihydroxy-5-[2-(pyridin-3-yl)ethoxy]phenyl}-6-[17-hydroxy-8-(2-hydroxyethyl)-2-oxa-9,10-dithiatricyclo[12.3.1.1?,?]nonadeca-1(18),14,16-trien-12-yl]oxan-4-yl acetate	5.591	5.591	Unknown	3	30	724.263	[M-H]-	725.269	-0.0005524	3.611	Catechols	VIOJPXDLVGWXPW-UHFFFAOYSA-N	O=C(OC1CC(OC(C1)C2CSSC(CCO)C3CCCC(OC4=CC(=CC=C4O)C2)C3)C5=CC(O)=C(O)C(OCCC=6C=NC=CC6)=C5)C	COCONUT=CNP0417794	0.000883712	0.000643937	0.000927197	0	0	0	0	0.000821889	0.000750125	0	0	0	0.000300141	0.00032164	0.000325345	0.000310301	0	0	0	0	0	0	0
216	neg_3415	Simple ID		1	neg	3415	11.582	745.28	[M-H]-	generic	C43H42N2O10	2-(hydroxymethyl)-3H-naphtho[2,3-e]indol-1-yl 6,7,11,16-tetrahydroxy-17-[(4-hydroxyphenyl)methyl]-15-[(methylamino)methyl]-8,18-dioxapentacyclo[8.7.1.0?,??.0?,??.0?,??]octadeca-2,4-diene-9-carboxylate	5.7288	5.7288	Unknown	3	29	745.28	[M-H]-	746.284	-0.0033309	3.256	Anthracenes	DFWFZJSIKIUHEZ-UHFFFAOYSA-N	O=C(OC=1C=2C(=CC=C3C=C4C=CC=CC4=CC32)NC1CO)C5OC6(O)C(O)C=C7C=CC89OC5C6(O)C7C9CC(CNC)C(O)C8CC%10=CC=C(O)C=C%10	COCONUT=CNP0098442	0	0.000346533	0.000331234	0.000685253	0.000535661	0.000525168	0	0	0	0.000685374	0.000384807	0	0.000318977	0.000307899	0.000354971	0.000344435	0.000419864	0.000386965	0.000423922	0.000533645	0.000646727	0.000991129	0
217	neg_3418	Unknown compound		1	neg	3418	0.994	746.283	[M-H]-																		0.000422616	0.00032668	0	0.00042288	0.000576355	0.000318395	0	0	0	0	0.000306221	0.000444677	0	0.000277451	0	0.000301666	0	0	0	0	0	0.000834137	0
218	neg_3427	Simple ID		1	neg	3427	14.809	749.353	[M-H]-	generic	C38H50N6O10	beta-Casomorphin (1-6)	5.8641	5.8641	Unknown	3	46	749.353	[M-H]-	750.359	-0.0011347	3.391	Peptides	WUHXJZCLFYNVBB-JNYJHILGNA-N	O=C(O)CCC(N=C(O)C(N=C(O)C(N=C(O)C1N(C(=O)C(N)CC2=CC=C(O)C=C2)CCC1)CC=3C=CC=CC3)C(C)C)C(=O)N4CCCC4C(=O)O	HMDB=HMDB0060168	0	0	0	0	0	0	0	0	0	0	0	0	0.000906947	0.000919267	0.000926782	0.000946462	0	0	0	0	0	0	0
219	neg_344	Simple ID		1	neg	344	19.39	215.071	[M-H]-	generic	C13H12O3	3-(3-ethyloxiran-2-yl)-1H-isochromen-1-one	5.0583	5.0583	Unknown	3	31	215.071	[M-H]-	216.079	0.0007678	2.946	Isocoumarins and derivatives	VNEONZFLGNRQJT-UHFFFAOYNA-N	O=C1OC(=CC=2C=CC=CC12)C3OC3CC	HMDB=HMDB0130031,KNApSAcK=C00043133,NANPDB=NANPDB_1721,UNPD=UNPD11241,COCONUT=CNP0238680	0	0.000335573	0.000347571	0	0.000147568	0	0.000601862	0.000709035	0.00061905	0.000444352	0.000542236	0.000513929	0	0.000274092	0.000285208	0	0	0	0	0	0.000256408	0	0
220	neg_345	Simple ID		1	neg	345	13.394	215.082	[M-H]-	generic	C12H12N2O2	34N	4.9903	4.9903	Unknown	3	18	215.082	[M-H]-	216.09	0.0010012	2.706	Indoles	QYDMJTFKQVPEHJ-UHFFFAOYSA-N	O=C(NCC(=O)C1=CNC=2C=CC=CC21)C	KNApSAcK=C00018512,UNPD=UNPD211539,NPA=NPA012899,COCONUT=CNP0157169	0	0	0	0	0	0	0.000830584	0.000617083	0.000507345	0	0	0	0.000371984	0.000298545	0.000329074	0.000294661	0	0	0	0	0	0	0.000948845
221	neg_3474	Unknown compound		1	neg	3474	21.937	764.506	[M-H]-																		0	0	0	0	0	0	0	0	0	0	0	0	0.000771695	0.00099988	0.00110565	0.00100897	0.00185622	0.00294177	0.00202504	0	0	0	0
222	neg_351	Simple ID		1	neg	351	9.89	216.124	[M-H]-	generic	C10H19NO4	Propionylcarnitine	5.1032	5.1032	Unknown	3	23	216.124	[M-H]-	217.131	3.16e-05	3.285	Acyl carnitines	UFAHZIUFPNSHSL-UHFFFAOYNA-N	O=C([O-])CC(OC(=O)CC)C[N+](C)(C)C	HMDB=HMDB0000824;HMDB0062514,ChEBI=CHEBI:28867;CHEBI:53210;CHEBI:53211,SMPDB=PW_C000658,FooDB=FDB022268,BMDB=BMDB00824,LipidMAPS=LMFA07070005;LMFA07070099;LMFA07070105,Urine=HMDB0000824,Saliva=HMDB0000824,Feces=HMDB0000824,CSF=HMDB0000824,Serum=HMDB0000824,PubChem=107738,UNPD=UNPD152946,BLEXP=BLEXPDB00000107738,COCONUT=CNP0082874	0	0	0	0	0	0	0	0	0	0	0	0	0.0004237	0	0	0	0.00200912	0.00198443	0.00124592	0	0	0	0
223	neg_3515	Unknown compound		1	neg	3515	12.59	784.383	[M-H]-																		0	0	0	0.00130291	0.000917634	0.00146937	0	0	0	0	0	0	0.00121957	0.00116861	0.00129601	0.00141822	0.00214238	0.00120833	0.00165655	0	0	0	0
224	neg_3517	Unknown compound		1	neg	3517	38.496	784.618	[M-H]-																		0	0	0.000292688	0.000309119	0.000217802	0.000484327	0.00157715	0.00139932	0.00156113	0	0	0	0.000341368	0.00110604	0.000836095	0.00036111	0.000469009	0.000344638	0.000368952	0.000782408	0.000435043	0.000485033	0.000284494
225	neg_3523	Simple ID		1	neg	3523	13.48	788.392	[M-H]-	generic	C47H55N3O8	4-{4-[(diaminomethylidene)amino]-16',19'-dihydroxy-6,9',13',22'-tetramethyl-10',24'-dioxo-15'-(2-phenylethenyl)spiro[cyclohexane-1,21'-hexacyclo[11.11.0.0?,??.0?,??.0?,??.0?,??]tetracosane]-1',2,17'-trien-6'-yn-5-yl}-3,4-dihydroxy-2-methylbut-2-enoic acid	5.5817	5.5817	Unknown	3	65	788.392	[M-H]-	789.399	-0.0007607	3.41	Triterpenoids	YTADJYIGVHOKLQ-UHFFFAOYSA-N	O=C(O)C(=C(O)C(O)C1C(N=C(N)N)C=CC2(CC3(O)C=CC4(O)C5=C6C(=O)CC2(C)C53CCC#CCC7(C(=O)CCC6(C)C7C4C=CC=8C=CC=CC8)C)C1C)C	COCONUT=CNP0097282	0.000455423	0.000476196	0.000479666	0	0.000176968	0.000201952	0.00100893	0.000872665	0.000887925	0.000574601	0.000497607	0.000460011	0.000372796	0.000294293	0.000325124	0.000317707	0.000213355	0.000144367	0	0.000422558	0.000339512	0.000470401	0
226	neg_1100	Simple ID	Other possible annotated peaks for this cluster.	2	neg	1100	10.28	300.099	[M-H]-	generic	C15H15N3O4	UNPD216435	6.6246	6.6246	Unknown	3	41	300.099	[M-H]-	301.106	0.0002795	3.821	Alpha amino acids and derivatives	QPYZUFUUNHUIIL-OAHLLOKOSA-N	O=C1NC(OC)(C(=O)NC1=CC2=CNC=3C=CC=CC23)CO	UNPD=UNPD216435,NPA=NPA005718,COCONUT=CNP0124798	0.00132854	0.00144678	0.00142716	0.000447451	0.000293749	0	0.00218188	0.00190264	0.00202775	0.00147619	0.000949066	0.00138101	0.000945629	0.000921121	0.000967733	0.000995766	0.000654027	0.000573736	0.000668788	0.00147502	0.0022187	0.00126199	0
227	neg_1995	Simple ID	Other possible annotated peaks for this cluster.	4	neg	1995	24.373	403.258	[M-H]-	generic	C23H36N2O4	eliglustat	6.2002	6.2002	Unknown	3	32	403.258	[M-H]-	404.268	0.0019312	3.63	Benzo-1,4-dioxanes	FJZZPCZKBUKGGU-UUSWMZEJNA-N	O=C(NC(CN1CCCC1)C(O)C2=CC=C3OCCOC3=C2)CCCCCCC	ChEBI=CHEBI:82752;CHEBI:83355,BLEXP=BLEXPDB00023652731	0	0	0	0	0	0	0	0	0	0	0	0	0.0240647	0.0250827	0.0247382	0.0249422	0.102715	0.0494049	0.103809	0	0	0	0
228	neg_3560	Unknown compound		1	neg	3560	11.683	810.358	[M-H]-																		0.000653264	0.000606687	0.000512798	0.0012919	0.00103378	0.00123906	0	0	0	0	0	0	0	0.000283938	0.000324559	0.000280872	0	0	0	0	0	0	0
229	neg_3562	Simple ID		1	neg	3562	20.813	810.506	[M-H]-	generic	C44H69N5O9	UNPD204912	5.1759	5.1759	Unknown	3	30	810.506	[M-H]-	811.51	-0.0034477	2.973	Cyclic depsipeptides	GYGCRMRQSIJOON-YSSWSXHBNA-N	O=C1OC(CCCCC)C(C(=O)NC(C(=O)N(C)C(C(=O)OC(C(=O)N2CCCC2C(=O)NC(C(=O)NC1)C(C)CC)C(C)CC)CC=3C=CC=CC3)C(C)C)(C)C	UNPD=UNPD204912,NPA=NPA003678,COCONUT=CNP0351878	0	0	0	0	0	0	0	0	0	0	0	0	0	0.000311011	0.000322482	0.000309105	0	0	0	0	0	0	0
230	neg_372	Unknown compound		1	neg	372	23.693	223.133	[M-H]-																		0	0	0	0.0138686	0.0118411	0.0119402	0	0	0	0.00815557	0.011135	0.0121957	0.00509623	0.00537683	0.0054075	0.00536586	0.00368907	0.00175003	0.00398102	0.00854938	0.00659018	0.00459467	0
231	neg_3737	Unknown compound		1	neg	3737	13.775	1198.54	[M-H]-																		0	0	0	0	0	0	0	0	0	0	0	0	0.000985351	0.000932211	0.000946245	0.000921141	0	0	0	0	0	0	0
232	neg_412	Simple ID		1	neg	412	20.461	229.145	[M-H]-	generic	C12H22O4	Talaromycin A	7.927	7.927	Unknown	3	42	229.145	[M-H]-	230.152	-0.0001673	4.611	Ketals	VDWRKBZMQNPUOB-UHFFFAOYNA-N	OCC1COC2(OCC(CC)CC2)CC1O	HMDB=HMDB0030143,KNApSAcK=C00040437;C00040438;C00040439;C00040440;C00040441;C00040442,FooDB=FDB001951;FDB012061;FDB012353;FDB012839;FDB012840;FDB012841,UNPD=UNPD137690;UNPD144929;UNPD145734;UNPD153644;UNPD38033;UNPD48233;UNPD49074;UNPD78213;UNPD96456,NPA=NPA019269,COCONUT=CNP0408372	0	0.000473965	0.000482063	0	0	0.000242183	0	0.000582833	0.000719667	0	0.000630649	0	0.000337276	0.000352732	0.000380405	0.000379969	0.000330805	0.000317144	0.000428597	0.00117516	0.000610296	0.00061008	0.000447274
233	neg_413	Simple ID		1	neg	413	19.324	229.145	[M-H]-	generic	C12H22O4	UNPD138865	6.1087	6.1087	Unknown	3	35	229.145	[M-H]-	230.152	-0.0002673	3.27	Medium-chain hydroxy acids and derivatives	NNXXCBGYPOEXLL-OMCWFEQJNA-N	O=C(O)C=CC(O)CCCCCCC(O)C	UNPD=UNPD138865,NPA=NPA003395,COCONUT=CNP0236951	0.000446445	0.000511142	0.000474079	0.000663309	0.000850258	0.000840691	0	0.000420783	0	0	0	0	0.00049624	0.000532907	0.000538749	0.000558063	0	0	0	0.000847833	0.000475619	0.000408639	0
234	neg_42	Simple ID		1	neg	42	13.882	137.024	[M-H]-	generic	C7H6O3	4-Hydroxybenzoic acid	5.7056	5.7056	Unknown	3	21	137.024	[M-H]-	138.032	0.0004176	3.121	Hydroxybenzoic acid derivatives	FJKROLUGYXJWQN-UHFFFAOYSA-N	O=C(O)C1=CC=C(O)C=C1	HMDB=HMDB0000500,KNApSAcK=C00000856,ChEBI=CHEBI:17879;CHEBI:30763,DrugBank=DB04242,SMPDB=PW_C000382,YMDB=YMDB00495,FooDB=FDB010508;FDB030501,NANPDB=NANPDB_802;NANPDB_1222;NANPDB_1355;NANPDB_1486;NANPDB_2216;NANPDB_3518,STOFF=STOFF_5337,BMDB=BMDB00500,Urine=HMDB0000500,Saliva=HMDB0000500,Feces=HMDB0000500,ECMDB=ECMDB00500,CSF=HMDB0000500,Serum=HMDB0000500,PubChem=135,PlantCyc=4-hydroxybenzoate,UNP…	0.00132085	0.00172424	0.00162433	0.000536452	0.000303482	0	0.00187626	0.00165382	0.00174053	0.00170701	0.00145408	0.00320748	0.00107952	0.000864835	0.00086944	0.00091576	0.00114048	0.000860489	0.000980262	0.00210591	0.00168628	0.00171357	0
235	neg_428	Unknown compound		1	neg	428	17.003	230.028	[M-H]-																		0	0	0	0.000393472	0.000344823	0	0.000643301	0.000801423	0.000598102	0.00286781	0.00216287	0.00220832	0.000588105	0.00055933	0.000573046	0.000587314	0.000365436	0.000225201	0.000291971	0.00128483	0	0.00194686	0
236	neg_442	Unknown compound		1	neg	442	0.955	233.104	[2M-H]-																		0.00170389	0.00174225	0.00284164	0.0024331	0.00175028	0.000925476	0.0040939	0.00462774	0.00539369	0.00362345	0.00576225	0.00457942	0.00104738	0.00112042	0.00109084	0.00115894	0.00137226	0.00148206	0.00187488	0.000743462	0.00115111	0.00234722	0.00184667
237	neg_444	Simple ID		1	neg	444	7.537	234.063	[M-H]-	generic	C9H9N5O3	UNPD30634	6.6638	6.6638	Unknown	3	43	234.063	[M-H]-	235.071	6.27e-05	3.729	Pterins and derivatives	RYAFSYJWGXAUOA-UHFFFAOYSA-N	O=C1N=C(N)NC2=NC=C(N=C12)COC(=O)C	UNPD=UNPD30634,COCONUT=CNP0111970	0.000912816	0.0010879	0.00103717	0.000617975	0.000699734	0	0.00096362	0.00129274	0	0.0041785	0.00305473	0.00326003	0.000811653	0	0	0	0	0	0	0	0	0	0
238	neg_446	Simple ID		1	neg	446	7.633	234.063	[M-H]-	generic	C9H9N5O3	UNPD30634	6.5966	6.5966	Unknown	3	33	234.063	[M-H]-	235.071	6.27e-05	3.611	Pterins and derivatives	RYAFSYJWGXAUOA-UHFFFAOYSA-N	O=C1N=C(N)NC2=NC=C(N=C12)COC(=O)C	UNPD=UNPD30634,COCONUT=CNP0111970	0	0	0	0	0	0	0	0	0.0013838	0	0	0	0	0.000960646	0.000965136	0.000937509	0	0.000185024	0	0.00237982	0.00267126	0.00104332	0
239	neg_453	Simple ID		1	neg	453	24.208	235.133	[M-H]-	generic	C14H20O3	1-epi-inuviscolide	7.4966	7.4966	Unknown	3	18	235.133	[M-H]-	236.141	0.000868	4.239	Gamma butyrolactones	VKYKPIJTOAOAIG-ULQVNCBJSA-N	O=C1OC2CCC3CCC(O)(C)C3CC2C1=C	NANPDB=NANPDB_6165,UNPD=UNPD126879,COCONUT=CNP0162444	0	0	0	0.00303883	0.00241804	0.00257399	0	0	0	0	0	0	0.00045427	0.00052508	0.000516652	0.000511485	0	0	0	0	0	0	0
240	neg_1064	Simple ID	Other possible annotated peaks for this cluster.	2	neg	1064	20.407	297.171	[M-H]-	generic	C16H26O5	Hebelophyllene G;(-)-Hebelophyllene G	7.2512	7.2512	Unknown	3	35	297.171	[M-H]-	298.178	-0.0003525	4.005	Fatty alcohols	AEOAKDQHDIICMZ-OQNOCLRMNA-N	O=C(OC)C(=C)C1CC(C)(C)C1CC(O)C(=C)C(O)CO	KNApSAcK=C00039349,UNPD=UNPD177636,NPA=NPA015544,COCONUT=CNP0162553	0	0	0	0	0	0	0	0	0	0.000904167	0	0	0.00100231	0.00109971	0.00126805	0.00127892	0	0	0.000401919	0	0.00101299	0.000746426	0.000504356
241	neg_464	Simple ID		1	neg	464	25.169	237.15	[M-H]-	generic	C14H22O3	(1S,2S)-3-Oxo-2[(2Z)-pentenyl]cyclopentane-1-butyric acid	7.5426	7.5426	Unknown	3	31	237.15	[M-H]-	238.157	-0.0001819	4.294	Cyclic ketones	LVQJNKFFJNUFNY-WBKCKFTDNA-N	O=C(O)CCCC1CCC(=O)C1CC=CCC	KNApSAcK=C00000230;C00000361,FooDB=FDB001428,LipidMAPS=LMFA02010010;LMFA02010011,UNPD=UNPD103588;UNPD173635,NPA=NPA008701;NPA015924,COCONUT=CNP0150252	0	0	0	0.00463889	0.00362839	0.00403846	0	0	0	0.00125229	0.00150359	0.00206398	0.000963706	0.00102596	0.00104877	0.00101576	0.000336739	0	0.000386638	0.00234296	0.00168227	0.00125614	0
242	neg_474	Simple ID		1	neg	474	20.47	238.145	[M-H]-	generic	C13H21NO3	3-acetamidoundeca-5,7-dienoic acid	6.5612	6.5612	Unknown	3	46	238.145	[M-H]-	239.152	6.71e-05	4.137		BSATYPPYQRYOBE-UHFFFAOYSA-N	O=C(O)CC(NC(=O)C)CC=CC=CCCC	COCONUT=CNP0348328	0	0	0	0.00145213	0.00194271	0.00187096	0	0	0	0	0	0	0.000327209	0.00035879	0.000369979	0.000363573	0	0	0	0	0	0	0
243	neg_475	Unknown compound		1	neg	475	25.237	238.18	[M-H]-																		0	0	0	0.0022323	0.00399707	0.0037966	0	0	0	0	0	0	0.000575626	0.000635097	0.00064913	0.000604636	0	0	0	0	0	0	0
244	neg_485	Simple ID		1	neg	485	14.715	241.072	[M-H]-	generic	C12H10N4O2	Lumichrome	6.3425	6.3425	Unknown	3	28	241.072	[M-H]-	242.08	0.0006991	3.736	Flavins	ZJTJUVIJVLLGSP-UHFFFAOYSA-N	O=C1N=C2NC=3C=C(C(=CC3N=C2C(=O)N1)C)C	KNApSAcK=C00030694,ChEBI=CHEBI:17781;CHEBI:37323,DrugBank=DB04345,PubChem=5326566,UNPD=UNPD93871,BLEXP=BLEXPDB00005326566,COCONUT=CNP0210205	0.00132593	0.00134592	0.00152726	0.00130001	0.00104671	0.0011167	0.00245218	0.00268532	0.00248191	0.00159096	0.00205721	0.00165058	0.00141984	0.00120691	0.00114188	0.00127764	0.000914814	0.000600938	0.000729888	0.00183022	0.00126447	0.00206033	0.000350689
245	neg_507	Simple ID		1	neg	507	20.853	243.159	[M-H]-	generic	C13H24O4	Factor 1	5.7623	5.7623	Unknown	3	35	243.16	[M-H]-	244.167	0.0006828	2.73	Fatty alcohols	XRKZVXDFKCVICZ-HXZPJVCONA-N	O=C1OCC(CO)C1C(O)CCCCC(C)C	KNApSAcK=C00000374,UNPD=UNPD30414,NPA=NPA010708,COCONUT=CNP0198454	0	0	0	0	0.000221448	0	0	0	0	0	0	0	0.000548397	0.000585706	0.000602877	0.000581302	0	0	0	0.00126548	0.000773087	0.000457923	0
246	neg_510	Simple ID		1	neg	510	19.844	243.16	[M-H]-	generic	C13H24O4	Sphaeric acid;(+)-Sphaeric acid	5.7803	5.7803	Unknown	3	32	243.16	[M-H]-	244.167	0.0005828	3.204	Medium-chain fatty acids	CFXMOECYUQUKMY-DUJBIPCPNA-N	O=C(O)C(C)C(C(=O)O)CCCCCCCC	KNApSAcK=C00049400,UNPD=UNPD40583,NPA=NPA014168,COCONUT=CNP0179461	0.0006751	0.000614078	0.000534059	0.000851348	0.000902657	0.000904052	0	0	0	0.00223588	0.00260876	0.00244065	0.00082212	0.000904315	0.000892282	0.000893557	0.00136702	0.00143452	0.00151223	0	0	0.00101748	0
247	neg_512	Simple ID		1	neg	512	21.697	243.16	[M-H]-	generic	C13H24O4	Sphaeric acid;(+)-Sphaeric acid	6.2195	6.2195	Unknown	3	31	243.16	[M-H]-	244.167	0.0004828	3.542	Medium-chain fatty acids	CFXMOECYUQUKMY-DUJBIPCPNA-N	O=C(O)C(C)C(C(=O)O)CCCCCCCC	KNApSAcK=C00049400,UNPD=UNPD40583,NPA=NPA014168,COCONUT=CNP0179461	0	0	0.000449908	0.000424424	0.000336948	0.000418275	0	0.000548786	0.000703061	0.000695571	0.00127276	0.000784498	0.000425614	0.000450184	0.000466818	0.0004738	0.000369414	0.000257819	0.000475677	0.00172803	0.000777376	0.000636501	0
248	neg_523	Simple ID		1	neg	523	17.902	244.043	[M-H]-	generic	C13H11NO2S	9-methyl-6H-benzo[c][1,2]benzothiazine 5,5-dioxide	4.3459	4.3459	Unknown	3	46	244.043	[M-H]-	245.051	0.0009731	2.79	Benzothiazines	KWNZYAUOWBBMJN-UHFFFAOYSA-N	O=S1(=O)NC2=CC=C(C=C2C=3C=CC=CC31)C	ChEBI=CHEBI:107367	0.00149945	0.00154519	0.00156962	0.00240581	0.00211939	0.00207113	0.00547914	0.00539505	0.00503093	0.0044658	0.00351798	0.00381738	0.00272148	0.00268105	0.00266086	0.00274318	0.00320051	0.00345984	0.00303943	0.0031296	0.00380712	0.0028386	0
249	neg_531	Simple ID		1	neg	531	0.978	245.08	[M-H]-	generic	C10H10N6O2	4-(1,3-benzodioxol-5-ylhydrazinylidene)pyrazole-3,5-diamine	3.4658	3.4658	Unknown	3	40	245.08	[M-H]-	246.087	-0.0009529	2.016	Benzodioxoles	TVJXVUSGFKUFNL-UHFFFAOYSA-N	N=1N=C(N)C(=NNC2=CC=C3OCOC3=C2)C1N	ChEBI=CHEBI:119941	0	0.000339988	0.000432091	0	0	0	0.000474553	0.00049492	0.000568834	0.000530132	0	0	0	0.000279264	0.000295359	0.000281568	0.000216701	0.000180725	0.000247646	0	0	0.000445394	0
250	neg_533	Simple ID		1	neg	533	13.454	245.093	[M-H]-	generic	C13H14N2O3	N-acetyltryptophan	7.5926	7.5926	Unknown	3	28	245.093	[M-H]-	246.1	6.59e-05	4.145	N-acyl-alpha amino acids	DZTHIGRZJZPRDV-STGVRZAANA-N	O=C(O)C(N=C(O)C)CC1=CNC=2C=CC=CC21	HMDB=HMDB0013713,ChEBI=CHEBI:16734;CHEBI:57877;CHEBI:70976;CHEBI:74640;CHEBI:133746,YMDB=YMDB00823,Urine=HMDB0013713,Feces=HMDB0013713,UNPD=UNPD30823,BLEXP=BLEXPDB00000002002,NPA=NPA015473,COCONUT=CNP0293251	0.00123216	0.00129235	0.00141633	0.000338612	0.000239028	0.000299891	0.00273008	0.00186576	0.00176491	0.000826436	0.000536379	0.000783142	0.000731686	0.000590025	0.000605305	0.000602221	0.000399097	0.000323815	0.000327547	0.000733674	0.000809274	0.000712045	0
251	neg_535	Simple ID	Other possible annotated peaks for this cluster.	3	neg	535	19.256	245.175	[M-H]-	generic	C13H26O4	MG(10:0/0:0/0:0)	5.802	5.802	Unknown	3	48	245.175	[M-H]-	246.183	0.0005329	3.267	1-monoacylglycerols	LKUNXBRZDFMZOK-GFCCVEGCSA-N	O=C(OCC(O)CO)CCCCCCCCC	HMDB=HMDB0072866,ChEBI=CHEBI:75551;CHEBI:75503;CHEBI:75526;CHEBI:75547,UNPD=UNPD198995,COCONUT=CNP0160380	0.00114549	0.00129564	0.00110341	0.0015053	0.00156631	0.00148472	0.000934276	0.00122763	0.00114984	0	0.000398909	0.000543165	0.00102945	0.00107531	0.00108869	0.00113985	0.00158911	0.00146366	0.00157464	0.000786859	0.000391115	0.00145561	0
252	neg_2531	Simple ID	Other possible annotated peaks for this cluster.	2	neg	2531	0.971	475.146	[M-H]-	generic	C20H28O13	Erythroxyloside A;(-)-Erythroxyloside A	4.9177	4.9177	Unknown	3	26	475.146	[M-H]-	476.153	-0.0006855	3.013	Phenolic glycosides	CDQFXFHWSXNKKO-ZCNRRTENNA-N	O=C(C1=C(O)C=C(OC2OC(COC3OCC(O)(CO)C3O)C(O)C(O)C2O)C=C1OC)C	KNApSAcK=C00031777,UNPD=UNPD128341,COCONUT=CNP0291718	0	0	0	0	0	0	0	0	0	0	0.000483181	0.00093071	0.00059228	0.00064974	0.000642558	0.000734127	0	0	0	0.00295795	0	0.0050283	0
253	neg_540	Simple ID		1	neg	540	7.611	247.108	[M-H]-	generic	C13H16N2O3	Abbeymycin	5.7674	5.7674	Unknown	3	28	247.108	[M-H]-	248.116	0.0006159	3.417	1,4-benzodiazepines	SSMFXCDUJJPFBJ-YCJUWHKPNA-N	O=C1C=2C=CC=CC2NC(OC)C3N1CC(O)C3	KNApSAcK=C00017837,UNPD=UNPD48353,NPA=NPA020829,COCONUT=CNP0345630	0	0	0	0	0	0	0	0.00066627	0.000685721	0	0	0	0	0.000323939	0	0	0	0	0	0	0.000481551	0	0
254	neg_542	Simple ID		1	neg	542	7.665	247.108	[M-H]-	generic	C13H16N2O3	Abbeymycin	6.0131	6.0131	Unknown	3	24	247.108	[M-H]-	248.116	0.0005159	3.603	1,4-benzodiazepines	SSMFXCDUJJPFBJ-YCJUWHKPNA-N	O=C1C=2C=CC=CC2NC(OC)C3N1CC(O)C3	KNApSAcK=C00017837,UNPD=UNPD48353,NPA=NPA020829,COCONUT=CNP0345630	0	0	0	0	0	0	0	0	0	0	0	0	0	0	0.000334961	0.000341259	0	0	0	0	0	0.000539318	0
255	neg_543	Simple ID		1	neg	543	17.651	248.092	[M-H]-	generic	C13H15NO4	Rigidiusculamide B;(-)-Rigidiusculamide B	6.5238	6.5238	Unknown	3	19	248.092	[M-H]-	249.1	0.0011315	3.505	1-hydroxy-2-unsubstituted benzenoids	LSHJERGXDDEZAD-RLQDDWLSNA-N	O=C1N(C)C(C(=O)C1(O)C)CC2=CC=C(O)C=C2	KNApSAcK=C00048077,UNPD=UNPD175835,NPA=NPA013449,COCONUT=CNP0257019	0.00454567	0.00534567	0.00549473	0	0	0	0	0	0	0	0	0	0.00068151	0.000653114	0.000677811	0.000698995	0	0.000168463	0	0	0	0	0
256	neg_551	Simple ID		1	neg	551	15.014	249.032	[M-H]-	generic	C12H11O4P	CNP0434006	4.5736	4.5736	Unknown	3	29	249.032	[M-H]-	250.039	0.000119	2.906	1-hydroxy-4-unsubstituted benzenoids	IAFWOPORZQMXJN-UHFFFAOYSA-N	O=P(O)(C=1C=CC=CC1O)C=2C=CC=CC2O	COCONUT=CNP0434006	0	0.000387356	0	0	0	0	0.000856002	0.00202533	0.000481643	0	0.000316421	0	0.00052794	0.000493131	0.000512302	0.000498688	0.000358002	0.000743426	0.000723961	0.00221398	0.000967037	0.000388279	0
257	neg_557	Simple ID		1	neg	557	2.649	249.136	[M-H]-	generic	C12H18N4O2	UNPD215765	6.5425	6.5425	Unknown	3	29	249.136	[M-H]-	250.143	-0.0006006	3.663	Alpha amino acids and derivatives	QYFSHTYKVAOVJM-UWVGGRQHSA-N	O=C1NC(C(=O)NC1CC=2N=CNC2)CC(C)C	UNPD=UNPD215765,NPA=NPA018556,COCONUT=CNP0125082	0.00119235	0.00133677	0.00125518	0.00049893	0.000572878	0	0.00152856	0.00132345	0	0.0016462	0.00123884	0.00118137	0.000825832	0	0	0	0	0	0	0	0.00242994	0	0.000467915
258	neg_561	Unknown compound		1	neg	561	21.642	250.105	[M-H]-																		0	0	0	0.000444056	0.000357972	0.000385148	0	0	0	0	0	0	0.000385694	0.000373827	0.000396294	0.000384755	0	0	0	0	0	0	0
259	neg_564	Double ID	Other possible annotated peaks for this cluster.	3	neg	564	14.368	250.144	[M-H]-	generic	C14H21NO3	UNPD229440	6.3689	6.3689	Unknown	3	29	250.144	[M-H]-	251.152	0.0006671	3.762	Tertiary alcohols	VHSAEFITJMNRDX-MWZJNRMFSA-N	O=CC=CC=CCCC=CC(=O)NCC(O)(C)C	UNPD=UNPD229440,COCONUT=CNP0258589	0	0	0	0	0	0	0	0	0	0	0	0	0.000427052	0.000381929	0.000375353	0.000384522	0	0	0	0	0	0	0
260	neg_567	Unknown compound		1	neg	567	18.876	251.139	[M-H]-																		0	0	0	0.00139698	0.00185062	0.00167801	0	0	0	0	0	0	0	0.000284501	0.000288943	0.000293584	0	0	0	0	0	0	0
261	neg_568	Simple ID		1	neg	568	26.011	251.164	[M-H]-	generic	C15H24O3	Piperalol	8.0047	8.0047	Unknown	3	25	251.164	[M-H]-	252.173	0.0011682	4.681	Secondary alcohols	MABZIKXHSLOMDZ-UHFFFAOYNA-N	O=CC1=CC(C)C2CC(C)(C)CC2C(O)C1CO	HMDB=HMDB0035767,KNApSAcK=C00021551,FooDB=FDB014505,UNPD=UNPD174433;UNPD80491,NPA=NPA016608,COCONUT=CNP0183573	0	0	0	0.00911252	0.00735055	0.00744861	0	0	0	0.00880829	0.0113889	0.0131812	0.00240946	0.00266117	0.00267562	0.00263577	0.000393769	0.000168547	0.000411153	0.00774621	0.00459207	0.00426219	0
262	neg_575	Unknown compound		1	neg	575	12.519	252.12	[M-H]-																		0	0	0	0.000483859	0	0.000285332	0	0	0	0	0	0	0.000582569	0.000443927	0.000469275	0.000477897	0	0	0	0	0	0	0
263	neg_601	Simple ID		1	neg	601	16.233	255.171	[M-H]-	generic	C13H24N2O3	2-{3-[2-(morpholin-4-yl)ethyl]piperidin-4-yl}acetic acid	6.3911	6.3911	Unknown	3	34	255.171	[M-H]-	256.179	0.0008162	3.757	Delta amino acids and derivatives	YRIQQLGDQQAISC-UHFFFAOYSA-N	O=C(O)CC1CCNCC1CCN2CCOCC2	COCONUT=CNP0010515	0	0	0	0.000983258	0.00118512	0.00112233	0	0	0	0	0	0	0	0.000270418	0	0	0	0	0	0	0	0	0
264	neg_614	Simple ID		1	neg	614	22.595	256.192	[M-H]-	generic	C14H27NO3	UNPD54709	6.1042	6.1042	Unknown	3	32	256.192	[M-H]-	257.199	-0.0001827	3.736	Alkaloids and derivatives	BBWGXHKVOKITQA-NVHKGDCHNA-N	O=C(O)CC1N(CCO)C(CCCCC)CCC1	UNPD=UNPD54709,COCONUT=CNP0388267	0	0	0	0	0	0	0	0	0	0	0	0	0.00125424	0.00135368	0.00135745	0.00133949	0.0115346	0.00171867	0.00881836	0	0	0	0
265	neg_1344	Simple ID	Other possible annotated peaks for this cluster.	2	neg	1344	10.153	323.124	[M+FA-H]-	generic	C14H18N2O4	N1-(alpha-D-ribosyl)-5,6-dimethyl-benzimidazole	4.9384	4.9384	Unknown	3	24	323.124	[M+FA-H]-	278.127	0.0004596	2.876	Benzimidazole ribonucleosides and ribonucleotides	HLRUKOJSWOKCPP-RYSNWHEDSA-N	OCC1OC(N2C=NC=3C=C(C(=CC32)C)C)C(O)C1O	HMDB=HMDB0011112,ChEBI=CHEBI:10329,FooDB=FDB027894,BMDB=BMDB11112,ECMDB=ECMDB11112,PubChem=440780;160433,UNPD=UNPD84167,COCONUT=CNP0322514	0.000553994	0.000546416	0.000615107	0	0	0	0.00101043	0.000749504	0.000720773	0	0	0	0	0.000334303	0.000353507	0.000329598	0	0	0	0	0	0	0
266	neg_3309	Simple ID	Other possible annotated peaks for this cluster.	2	neg	3309	14.904	699.302	[M-H]-	generic	C38H44N4O9	UNPD126736	5.2901	5.2901	Unknown	3	35	699.302	[M-H]-	700.311	0.0014525	2.77	Tetrapyrroles and derivatives	LXLDOKHNFJEFAC-YFKMIOQGNA-N	O=C(OC1CC(O)C(OC1C2(C(=O)C3=NC2=CC=4NC(C=C5N=C(C=C6C=C(C(=C3)N6)C)C(C5=O)(C)C7OC(C)C(O)CC7O)=CC4C)C)C)C	UNPD=UNPD126736,NPA=NPA016120,COCONUT=CNP0353088	0.000951679	0.000983334	0.00084789	0.000493421	0.000463668	0.000449276	0	0	0	0.000428024	0.000614881	0.000556465	0.000593794	0.000554699	0.000565772	0.000579256	0.000523187	0.000492367	0.000515019	0	0.000346709	0.000417286	0
267	neg_624	Simple ID		1	neg	624	19.909	257.175	[M-H]-	generic	C14H26O4	Tetradecanedioic acid	6.2623	6.2623	Unknown	3	27	257.175	[M-H]-	258.183	0.0004329	3.472	Long-chain fatty acids	HQHCYKULIHKCEB-UHFFFAOYSA-N	O=C(O)CCCCCCCCCCCCC(=O)O	HMDB=HMDB0000872,ChEBI=CHEBI:76281;CHEBI:76308,FooDB=FDB022293,STOFF=STOFF_7478,BMDB=BMDB00872,LipidMAPS=LMFA01170018,Feces=HMDB0000872,Serum=HMDB0000872,UNPD=UNPD157587,BLEXP=BLEXPDB00000013185,COCONUT=CNP0288337	0	0	0	0.000709007	0.000881034	0.00085349	0	0	0	0	0	0	0	0	0.000357193	0.000357909	0	0.000438951	0.00031153	0	0	0	0
268	neg_628	Unknown compound		1	neg	628	28.085	257.211	[M+FA-H]-																		0	0	0	0	0	0.00735353	0	0	0	0	0.000491245	0.000557412	0.00125624	0.00127833	0.00136367	0.00134921	0	0	0	0	0	0	0
269	neg_654	Simple ID		1	neg	654	11.567	260.149	[M-H]-	generic	C12H23NO5	CNP0447649	7.1295	7.1295	Unknown	3	27	260.149	[M-H]-	261.158	0.0009464	3.936	Medium-chain fatty acids	WIBRTSNRTOPKSU-UHFFFAOYSA-N	O=C(O)CCCCCNC(=O)C(O)C(C)(C)CO	COCONUT=CNP0447649	0	0	0	0.00343161	0.00231323	0	0	0	0	0	0	0	0.000746342	0.000603896	0.00062774	0.000636953	0	0	0	0	0	0	0
270	neg_657	Simple ID		1	neg	657	9.541	261.087	[M-H]-	generic	C13H14N2O4	L-cis-Cyclo(aspartylphenylalanyl)	7.1532	7.1532	Unknown	3	30	261.087	[M-H]-	262.095	0.0009805	4.006	Alpha amino acids and derivatives	VNHJXYUDIBQDDX-UHFFFAOYNA-N	O=C(O)CC1NC(=O)C(NC1=O)CC=2C=CC=CC2	HMDB=HMDB0031360,FooDB=FDB003427,BLEXP=BLEXPDB00000119494,COCONUT=CNP0321860	0.00087212	0.00118828	0.00112911	0	0	0	0	0.00218269	0.00208445	0	0	0.00207889	0.000985961	0.000989143	0.000983705	0.00103875	0.000553094	0.00048983	0.000447994	0.001495	0.00156299	0.000914237	0
271	neg_659	Simple ID		1	neg	659	10.902	261.123	[M-H]-	generic	C14H18N2O3	Prolylphenylalanine	5.5202	5.5202	Unknown	3	35	261.123	[M-H]-	262.132	0.001066	3.188	Dipeptides	IWIANZLCJVYEFX-UHFFFAOYNA-N	O=C(O)C(NC(=O)C1NCCC1)CC=2C=CC=CC2	HMDB=HMDB0011179,ChEBI=CHEBI:74795,FooDB=FDB027951,BMDB=BMDB11179,BLEXP=BLEXPDB00005226097,COCONUT=CNP0401040	0	0	0	0.00100182	0.000669736	0.000637671	0	0	0	0.00241184	0.00120879	0.00110312	0.000668728	0.00067763	0.000656599	0.000636687	0.000360131	0.000641834	0.000412932	0.00196614	0.00188119	0.00154583	0
272	pos_2100	Double ID		3	pos	2100	15.495	246.169	[M+H]+	generic	C12H23NO4	7-{[(tert-butoxy)carbonyl]amino}heptanoic acid	7.8313	7.8313	Unknown	3	30	246.169	[M+H]+	245.163	0.0009847	4.801	Medium-chain fatty acids	HJENAZQPOGVAEK-UHFFFAOYSA-N	O=C(OC(C)(C)C)NCCCCCCC(=O)O	COCONUT=CNP0035825	0	0	0	0.0126407	0.01196	0.0118239	0	0	0	0	0	0	0.00302613	0.00299693	0.00282598	0.0031791	0.00589352	0.00555293	0.0060945	0	0	0	0
273	neg_704	Simple ID		1	neg	704	19.826	267.171	[M-H]-	generic	C14H24N2O3	2-[3-({3-[(2,2-dimethylpropyl)amino]oxetan-3-yl}methyl)-1,2-oxazol-5-yl]ethan-1-ol	6.7001	6.7001	Unknown	3	22	267.171	[M-H]-	268.179	0.0007162	3.971	Aralkylamines	HSOZFDHIYATYSV-UHFFFAOYSA-N	OCCC=1ON=C(C1)CC2(NCC(C)(C)C)COC2	COCONUT=CNP0004726	0	0	0	0.00217597	0.00221396	0.00226671	0	0	0	0	0	0	0.000561322	0.00062173	0.000605764	0.00060252	0	0	0	0	0	0	0
274	neg_72	Simple ID		1	neg	72	7.402	151.04	[M-H]-	generic	C8H8O3	p-Anisic acid	6.89	6.89	Unknown	3	22	151.04	[M-H]-	152.047	0.0003677	3.483	P-methoxybenzoic acids and derivatives	ZEYHEAKUIGZSGI-UHFFFAOYSA-N	O=C(O)C1=CC=C(OC)C=C1	HMDB=HMDB0001101,KNApSAcK=C00029536;C00041076,ChEBI=CHEBI:16639;CHEBI:40813,DrugBank=DB02795,YMDB=YMDB01638,FooDB=FDB008969;FDB010587,NANPDB=NANPDB_1487;NANPDB_3533,BMDB=BMDB01101,Feces=HMDB0001101,PubChem=7478,UNPD=UNPD163358,BLEXP=BLEXPDB00000007478,COCONUT=CNP0249583	0.000809134	0.00079787	0.000805981	0	0	0	0.000599861	0.000595902	0	0.000983723	0.000749549	0.000700611	0.000407642	0	0	0	0	0	0	0	0	0	0
275	neg_720	Simple ID		1	neg	720	0.986	269.081	[2M-H]-	generic	C6H5N3O	3,N(4)-ethenocytosine	3.5663	3.5663	Unknown	3	34	269.081	[2M-H]-	135.043	-0.0005022	2.089	Imidazopyrimidines	GICKXGZWALFYHZ-UHFFFAOYSA-N	O=C1NC=CC2=NC=CN21	ChEBI=CHEBI:29147,BLEXP=BLEXPDB00135476780,COCONUT=CNP0001322	0.00131973	0.00169116	0.00189364	0.000612223	0.000445453	0.000703886	0.00240107	0.00244211	0.00304099	0.00223889	0.000704672	0.00238684	0.00166171	0.00162764	0.00167932	0.00170344	0.00102919	0.000962993	0.00117598	0.00136239	0.00104438	0.00218046	0
276	neg_73	Simple ID		1	neg	73	10.174	151.04	[M-H]-	generic	C8H8O3	p-Anisic acid	6.855	6.855	Unknown	3	21	151.04	[M-H]-	152.047	-0.0003323	3.87	P-methoxybenzoic acids and derivatives	ZEYHEAKUIGZSGI-UHFFFAOYSA-N	O=C(O)C1=CC=C(OC)C=C1	HMDB=HMDB0001101,KNApSAcK=C00029536;C00041076,ChEBI=CHEBI:16639;CHEBI:40813,DrugBank=DB02795,YMDB=YMDB01638,FooDB=FDB008969;FDB010587,NANPDB=NANPDB_1487;NANPDB_3533,BMDB=BMDB01101,Feces=HMDB0001101,PubChem=7478,UNPD=UNPD163358,BLEXP=BLEXPDB00000007478,COCONUT=CNP0249583	0	0	0	0	0	0	0	0.00233982	0.00236744	0	0	0.00355854	0	0	0.00132657	0	0.0015517	0.00104382	0.00126078	0.00259245	0	0.00150528	0
277	neg_730	Simple ID		1	neg	730	16.664	269.187	[M-H]-	generic	C14H26N2O3	2-{3-[2-(4-hydroxypiperidin-1-yl)ethyl]piperidin-4-yl}acetic acid	5.7852	5.7852	Unknown	3	38	269.187	[M-H]-	270.194	0.0005662	3.652	Delta amino acids and derivatives	ZJCIRXKOZUQVHA-UHFFFAOYSA-N	O=C(O)CC1CCNCC1CCN2CCC(O)CC2	COCONUT=CNP0113520	0	0	0	0	0	0	0	0	0	0	0	0	0.000678748	0.000654635	0.0007189	0.000693804	0.00280586	0.00353999	0.00290805	0	0	0	0
278	neg_733	Simple ID	Other possible annotated peaks for this cluster.	3	neg	733	18.214	269.187	[M-H]-	generic	C14H26N2O3	2-(3-{2-[2-(hydroxymethyl)pyrrolidin-1-yl]ethyl}piperidin-4-yl)acetic acid	6.8392	6.8392	Unknown	3	36	269.187	[M-H]-	270.194	0.0003662	3.986	Delta amino acids and derivatives	KKBAXHLQHDWMPD-UHFFFAOYSA-N	O=C(O)CC1CCNCC1CCN2CCCC2CO	COCONUT=CNP0213649	0	0	0	0.00315604	0.00421262	0.00426731	0	0	0	0	0	0	0.00097309	0.000956595	0.00105986	0.00102473	0	0	0	0	0	0	0
279	neg_74	Simple ID		1	neg	74	7.522	151.04	[M-H]-	generic	C8H8O3	p-Anisic acid	6.5861	6.5861	Unknown	3	11	151.04	[M-H]-	152.047	-0.0003323	3.534	P-methoxybenzoic acids and derivatives	ZEYHEAKUIGZSGI-UHFFFAOYSA-N	O=C(O)C1=CC=C(OC)C=C1	HMDB=HMDB0001101,KNApSAcK=C00029536;C00041076,ChEBI=CHEBI:16639;CHEBI:40813,DrugBank=DB02795,YMDB=YMDB01638,FooDB=FDB008969;FDB010587,NANPDB=NANPDB_1487;NANPDB_3533,BMDB=BMDB01101,Feces=HMDB0001101,PubChem=7478,UNPD=UNPD163358,BLEXP=BLEXPDB00000007478,COCONUT=CNP0249583	0	0	0	0	0	0	0	0	0.000608598	0	0	0	0	0.000397741	0.000417384	0.00040823	0.000203162	0.000175427	0.00020315	0.000560987	0.000443513	0.000630606	0
280	neg_744	Simple ID		1	neg	744	7.645	271.094	[M-H]-	generic	C11H16N2O6	UNPD177021	4.3948	4.3948	Unknown	3	18	271.094	[M-H]-	272.101	-0.0002402	2.817	N-acyl-alpha amino acids	GTTINBWNPGSJBA-WHOSYVTDNA-N	O=C(O)C(N)CCC(=O)NC(C(=O)O)C(O)C#CC	UNPD=UNPD177021,COCONUT=CNP0269110	0.00135076	0.00125721	0.00133225	0.000638698	0.000496321	0	0.00147046	0.00129187	0	0	0	0	0.000872542	0	0	0	0	0.000418684	0	0	0	0	0
281	neg_745	Simple ID		1	neg	745	9.587	271.094	[M-H]-	generic	C11H16N2O6	UNPD177021	4.4614	4.4614	Unknown	3	31	271.094	[M-H]-	272.101	-0.0002402	2.647	N-acyl-alpha amino acids	GTTINBWNPGSJBA-WHOSYVTDNA-N	O=C(O)C(N)CCC(=O)NC(C(=O)O)C(O)C#CC	UNPD=UNPD177021,COCONUT=CNP0269110	0.00106617	0.00115102	0.00115101	0.000674166	0.000490553	0	0.00176657	0.00120976	0.00121769	0.00120305	0.0007653	0	0.00102364	0.000820666	0.000706056	0.00068407	0.000389813	0.000315474	0.000324483	0.000976113	0.000637618	0	0.000323509
282	neg_746	Unknown compound		1	neg	746	7.773	271.096	[M-H]-																		0	0	0	0	0	0	0	0	0	0	0	0	0	0.000766502	0.000798481	0.000715823	0.000558408	0	0.000456924	0	0	0	0
283	neg_749	Simple ID		1	neg	749	16.646	271.166	[M-H]-	generic	C13H24N2O4	Elaiomycin D	4.7236	4.7236	Unknown	3	35	271.166	[M-H]-	272.174	-6.92e-05	2.87	Azoxy compounds	BRLWDWOZGPKZAD-XLTRDJIWSA-N	O=C(C)CCCCC=C[N+]([O-])=NC(COC)C(O)C	NPA=NPA016025,COCONUT=CNP0351702	0.000502838	0.000516641	0.000484228	0	0	0	0	0.000493748	0.000470993	0.000522289	0.000538022	0.000565958	0	0.000306438	0.000301638	0.000309086	0	0	0	0	0.0003448	0.000520867	0
284	neg_75	Simple ID		1	neg	75	10.483	151.04	[M-H]-	generic	C8H8O3	p-Anisic acid	9.1639	9.1639	Unknown	3	23	151.04	[M-H]-	152.047	-0.0003323	5.203	P-methoxybenzoic acids and derivatives	ZEYHEAKUIGZSGI-UHFFFAOYSA-N	O=C(O)C1=CC=C(OC)C=C1	HMDB=HMDB0001101,KNApSAcK=C00029536;C00041076,ChEBI=CHEBI:16639;CHEBI:40813,DrugBank=DB02795,YMDB=YMDB01638,FooDB=FDB008969;FDB010587,NANPDB=NANPDB_1487;NANPDB_3533,BMDB=BMDB01101,Feces=HMDB0001101,PubChem=7478,UNPD=UNPD163358,BLEXP=BLEXPDB00000007478,COCONUT=CNP0249583	0	0.00115312	0.00118632	0.000394272	0	0	0.00472878	0.00372097	0.00351359	0.00155609	0.00104518	0.00582709	0.00201299	0.00183376	0.00185236	0.00186826	0.00241453	0.00166698	0.00193217	0.00390691	0.00397193	0.00225031	0
285	neg_765	Simple ID		1	neg	765	17.649	272.185	[M-H]-	generic	C14H27NO4	Heptanoylcarnitine	5.4662	5.4662	Unknown	3	18	272.185	[M-H]-	273.194	0.0013319	3.409	Acyl carnitines	VDPCTFWULDLKHT-UHFFFAOYNA-N	O=C([O-])CC(OC(=O)CCCCCC)C[N+](C)(C)C	HMDB=HMDB0013238,ChEBI=CHEBI:74303,FooDB=FDB029350,LipidMAPS=LMFA07070068,COCONUT=CNP0342488	0	0	0	0.00124855	0.0011169	0.00113786	0	0	0	0	0	0	0	0	0.000294557	0	0.000422981	0.000488057	0.000429389	0	0	0	0
286	neg_773	Simple ID		1	neg	773	9.563	273.091	[M-H]-	generic	C11H18N2O4S	3-(2-aminoethylthio)-6-(1-hydroxyethyl)-7-keto-1-azabicyclo[3.2.0]heptane-2-carboxylic acid	4.2806	4.2806	Unknown	3	37	273.091	[M-H]-	274.099	0.0007516	2.713	Thienamycins	DMEPNWQBJCSHJH-UHFFFAOYSA-N	O=C(O)C1N2C(=O)C(C(O)C)C2CC1SCCN	PubChem=92042763,COCONUT=CNP0209534	0.000344466	0.000388983	0.000377868	0	0.000164947	0	0.000600513	0.000393306	0	0.000398916	0	0	0.000336214	0	0	0	0	0	0	0	0	0	0
287	neg_775	Simple ID		1	neg	775	16.496	273.124	[M-H]-	generic	C15H18N2O3	N-(indole-3-acetyl)valine	6.0617	6.0617	Unknown	3	33	273.124	[M-H]-	274.132	0.000866	3.679	Valine and derivatives	AZEGJHGXTSUPPG-UHFFFAOYNA-N	O=C(O)C(NC(=O)CC1=CNC=2C=CC=CC21)C(C)C	ChEBI=CHEBI:133561,DrugBank=DB07953,FooDB=FDB030934,PlantCyc=CPD-9577,COCONUT=CNP0373371	0.000471519	0.000495965	0.000499091	0.000240379	0.000205195	0.000215491	0.000601813	0.000518198	0.0005225	0.000533807	0.000494865	0.000500043	0.000375968	0.000346797	0.000349874	0.000348241	0.000208093	0.000198831	0.000194898	0.000444658	0.000395581	0.000546141	0
288	neg_786	Simple ID		1	neg	786	23.971	273.206	[M-H]-	generic	C15H30O4	MG(12:0/0:0/0:0)	6.8602	6.8602	Unknown	3	39	273.206	[M-H]-	274.214	0.000733	3.816	1-monoacylglycerols	ARIWANIATODDMH-CQSZACIVSA-N	O=C(OCC(O)CO)CCCCCCCCCCC	HMDB=HMDB0072863,KNApSAcK=C00049928,ChEBI=CHEBI:75529;CHEBI:75543;CHEBI:75528;CHEBI:75539,STOFF=STOFF_2268,LipidMAPS=LMGL01010008,UNPD=UNPD85303,BLEXP=BLEXPDB00000014871,COCONUT=CNP0225154	0	0	0	0.00184262	0.00196312	0.00194912	0	0	0	0	0.000453293	0.000471016	0.000414328	0.000463701	0.000465995	0.000455712	0	0	0	0	0	0	0
289	neg_788	Simple ID		1	neg	788	15.831	274.018	[M-H]-	generic	C13H9NO4S	7,8-dihydroxy-3-(2-methyl-1,3-thiazol-4-yl)-4H-chromen-4-one	6.1419	6.1419	Unknown	3	30	274.018	[M-H]-	275.025	0.0002523	3.889	Chromones	VMVYMIWOVFQGAH-UHFFFAOYSA-N	O=C1C(=COC2=C(O)C(O)=CC=C12)C=3N=C(SC3)C	COCONUT=CNP0359394	0	0	0	0	0.000263008	0	0	0	0	0.00394354	0	0	0.000432238	0.000430452	0.000461499	0.000462315	0	0	0	0.000754813	0.00172352	0.0012176	0
290	neg_806	Simple ID		1	neg	806	13.24	275.106	[M-H]-	generic	C11H20N2O4S	Pantothenoylaminoethenethiol	5.0548	5.0548	Unknown	3	30	275.106	[M-H]-	276.114	0.0013017	2.691	Beta amino acids and derivatives	GVPONLWGQFZYSV-CYNONHLPSA-N	O=C(NC=CS)CCNC(=O)C(O)C(C)(C)CO	DrugBank=DB03738	0	0	0	0.00120116	0.000808655	0.00099631	0	0	0	0.000684172	0.00074841	0.000988475	0.000580648	0.000469022	0.000475825	0	0.000478679	0.000173985	0.000349429	0.00243005	0.00116628	0.00104062	0
291	neg_809	Simple ID		1	neg	809	16.856	276.033	[M-H]-	generic	C13H11NO4S	UNPD88771	5.0036	5.0036	Unknown	3	32	276.033	[M-H]-	277.041	0.0003024	3.173	Phenol esters	XPHLSLKMCUKMMR-UHFFFAOYSA-N	O=C(OC)C=1N=C(SC1)C=2C=CC=CC2OC(=O)C	UNPD=UNPD88771,COCONUT=CNP0278944	0	0	0	0	0.000196909	0	0	0.00037671	0	0.00218632	0.00201247	0.00158084	0.000309608	0.000322225	0.000320713	0.00032779	0	0.000152993	0	0.000633968	0.000835803	0.00124431	0
292	neg_823	Simple ID	Other possible annotated peaks for this cluster.	2	neg	823	9.317	277.122	[M-H]-	generic	C11H22N2O4S	Pantetheine	6.6748	6.6748	Unknown	3	34	277.122	[M-H]-	278.13	0.0011517	3.767	Beta amino acids and derivatives	ZNXZGRMVNNHPCA-UHFFFAOYNA-N	O=C(NCCS)CCNC(=O)C(O)C(C)(C)CO	HMDB=HMDB0003426,ChEBI=CHEBI:16753,SMPDB=PW_C001887,FooDB=FDB023172,BMDB=BMDB03426,ECMDB=ECMDB03426,PubChem=439322,PlantCyc=CPD-511,UNPD=UNPD326,BLEXP=BLEXPDB00000000479,COCONUT=CNP0332663	0	0	0	0	0	0	0	0	0	0	0	0	0	0.00076205	0.000777727	0.000805495	0.000724253	0.000395303	0.000632165	0.00363369	0.00114486	0.00110266	0
293	neg_826	Simple ID	Other possible annotated peaks for this cluster.	6	neg	826	16.816	277.122	[M-H]-	generic	C11H22N2O4S	Pantetheine	6.8317	6.8317	Unknown	3	23	277.122	[M-H]-	278.13	0.0011517	3.713	Beta amino acids and derivatives	ZNXZGRMVNNHPCA-UHFFFAOYNA-N	O=C(NCCS)CCNC(=O)C(O)C(C)(C)CO	HMDB=HMDB0003426,ChEBI=CHEBI:16753,SMPDB=PW_C001887,FooDB=FDB023172,BMDB=BMDB03426,ECMDB=ECMDB03426,PubChem=439322,PlantCyc=CPD-511,UNPD=UNPD326,BLEXP=BLEXPDB00000000479,COCONUT=CNP0332663	0.00134497	0.00121476	0.00133331	0.00211051	0.00189316	0.00198201	0	0	0	0.000745027	0.000784702	0.000880913	0.00133779	0.00134375	0.00146658	0.001503	0.00257526	0.00251315	0.00276383	0.00201907	0.00121349	0.00171019	0
294	neg_828	Simple ID	Other possible annotated peaks for this cluster.	2	neg	828	17.415	277.122	[M-H]-	generic	C11H22N2O4S	Pantetheine	7.0569	7.0569	Unknown	3	34	277.122	[M-H]-	278.13	0.0011517	3.675	Beta amino acids and derivatives	ZNXZGRMVNNHPCA-UHFFFAOYNA-N	O=C(NCCS)CCNC(=O)C(O)C(C)(C)CO	HMDB=HMDB0003426,ChEBI=CHEBI:16753,SMPDB=PW_C001887,FooDB=FDB023172,BMDB=BMDB03426,ECMDB=ECMDB03426,PubChem=439322,PlantCyc=CPD-511,UNPD=UNPD326,BLEXP=BLEXPDB00000000479,COCONUT=CNP0332663	0.00125572	0.00141071	0.00158187	0.00056779	0.000367311	0.000480043	0	0	0	0.00431823	0.00160376	0.000975343	0.000851016	0.00084691	0.000875328	0.000869009	0.000723096	0.00087416	0.000762052	0.0024879	0.00159924	0.0045155	0.000463495
295	neg_830	Simple ID		1	neg	830	16.174	277.122	[M-H]-	generic	C11H22N2O4S	Pantetheine	7.0152	7.0152	Unknown	3	29	277.122	[M-H]-	278.13	0.0011517	3.712	Beta amino acids and derivatives	ZNXZGRMVNNHPCA-UHFFFAOYNA-N	O=C(NCCS)CCNC(=O)C(O)C(C)(C)CO	HMDB=HMDB0003426,ChEBI=CHEBI:16753,SMPDB=PW_C001887,FooDB=FDB023172,BMDB=BMDB03426,ECMDB=ECMDB03426,PubChem=439322,PlantCyc=CPD-511,UNPD=UNPD326,BLEXP=BLEXPDB00000000479,COCONUT=CNP0332663	0	0	0	0	0	0	0	0	0	0	0	0	0	0	0	0.000558812	0	0	0	0.00130999	0.000871613	0.00115736	0
296	neg_835	Simple ID		1	neg	835	13.341	277.122	[M-H]-	generic	C11H22N2O4S	Pantetheine	7.4674	7.4674	Unknown	3	44	277.122	[M-H]-	278.13	0.0011517	3.973	Beta amino acids and derivatives	ZNXZGRMVNNHPCA-UHFFFAOYNA-N	O=C(NCCS)CCNC(=O)C(O)C(C)(C)CO	HMDB=HMDB0003426,ChEBI=CHEBI:16753,SMPDB=PW_C001887,FooDB=FDB023172,BMDB=BMDB03426,ECMDB=ECMDB03426,PubChem=439322,PlantCyc=CPD-511,UNPD=UNPD326,BLEXP=BLEXPDB00000000479,COCONUT=CNP0332663	0	0	0	0.00175391	0.00157426	0.00168744	0	0.00153765	0	0	0.000867857	0.00121427	0.000763304	0.000722357	0.000750984	0.000743686	0	0	0	0	0.000847068	0.000853638	0
297	neg_319	Simple ID		2	neg	319	24.263	210.149	[M-H]-	generic	C12H21NO2	Elaeokanine C	4.4822	4.4822	Unknown	3	30	210.149	[M-H]-	211.157	0.0006525	2.738	Indolizidines	JWTAWEGUCCQPAM-PGMLWUOVNA-N	O=C(CCC)C1C(O)CCN2CCCC21	KNApSAcK=C00002337,ChEBI=CHEBI:4766,UNPD=UNPD3167,COCONUT=CNP0111456	0	0	0	0.010987	0.0158741	0.0142213	0	0	0	0	0	0	0.00331712	0.00359346	0.00370589	0.00357527	0	0	0	0	0	0	0
298	neg_866	Simple ID		1	neg	866	14.836	280.13	[M-H]-	generic	C13H19N3O4	Streptcytosine I	7.0033	7.0033	Unknown	3	33	280.13	[M-H]-	281.138	0.0005796	4.018	Hydroxypyrimidines	RCQRHPBVECSRJG-VDDIYKPWSA-N	O=C1N=C(C=CN1C2OC(C)C(O)CC2)NC(=O)CC	NPA=NPA025447,COCONUT=CNP0285303	0.00058745	0.000586604	0.000569273	0	0	0	0.000695809	0.000553669	0.000573859	0.000467221	0.000404553	0.000500802	0.000373917	0.000314412	0	0	0	0	0	0	0.00038751	0.000390925	0
299	neg_909	Simple ID		1	neg	909	15.75	283.165	[M-H]-	generic	C14H24N2O4	oseltamivir acid	5.9997	5.9997	Unknown	3	21	283.165	[M-H]-	284.174	0.0013308	3.119	Gamma amino acids and derivatives	NENPYTRHICXVCS-YNEHKIRRSA-N	O=C(O)C1=CC(OC(CC)CC)C(NC(=O)C)C(N)C1	ChEBI=CHEBI:73139,DrugBank=DB02600,STOFF=STOFF_3720,BLEXP=BLEXPDB00000449381	0.00277997	0.00270822	0.00279337	0.000692794	0.00058519	0.000603869	0.00159569	0.00144673	0.00139859	0.00304827	0.00291298	0.00309348	0.00119987	0.00114858	0.00113268	0.00115775	0.000502652	0.000395588	0.000412863	0.00149459	0.00100896	0.00150377	0
300	neg_81	Simple ID	Other possible annotated peaks for this cluster.	4	neg	81	17.838	153.128	[M-H]-	generic	C10H18O	3,7-Dimethyl-1,6-octadien-3-ol	8.7535	8.7535	Unknown	3	20	153.128	[M-H]-	154.136	0.0003887	4.35	Acyclic monoterpenoids	CDOSHBSSFJOMGT-UHFFFAOYNA-N	OC(C=C)(C)CCC=C(C)C	HMDB=HMDB0036100;HMDB0036101;HMDB0036102,KNApSAcK=C00003047;C00010301;C00034888,ChEBI=CHEBI:17580;CHEBI:28;CHEBI:98,YMDB=YMDB01371,FooDB=FDB014940;FDB014941;FDB014942,NANPDB=NANPDB_4474;NANPDB_5039;NANPDB_5225;NANPDB_5863;NANPDB_6800,STOFF=STOFF_106,LipidMAPS=LMPR0102010013,Feces=HMDB0036100;HMDB0036101;HMDB0036102,PubChem=443158;67179;6549,PlantCyc=CPD-8996;CPD-8997;CPD-14733,UNPD=UNPD106513;UNP…	0.00197854	0.00180014	0.00170657	0.00122258	0.00101329	0.00109201	0.000672411	0	0.000436893	0.00450399	0.00469936	0.00464334	0.00126506	0.00125818	0.00129696	0.00128092	0.00037228	0.000505359	0.000385677	0.00270822	0.00176185	0.00374316	0
301	neg_93	Simple ID		1	neg	93	12.84	157.087	[M-H]-	generic	C8H14O3	5-Butyl-1,4-dioxan-2-one	5.854	5.854	Unknown	3	22	157.087	[M-H]-	158.094	1.79e-05	3.359	1,4-dioxanes	DVBUFRRUKPQWBU-UHFFFAOYNA-N	O=C1OCC(OC1)CCCC	HMDB=HMDB0059938,COCONUT=CNP0043229	0	0	0	0	0	0	0.00724763	0.00453869	0.00415331	0	0	0	0.000674235	0.000544151	0.000579467	0.00056021	0	0	0	0	0	0	0
302	neg_934	Simple ID		1	neg	934	3.831	285.072	[M-H]-	generic	C11H14N2O7	UNPD179907	7.4355	7.4355	Unknown	3	35	285.072	[M-H]-	286.08	0.0005243	4.249	Pyrimidine nucleosides	KTMVKCZHYODLLY-ATQLEGSONA-N	O=C1C=CN(C(=O)N1)C2OC(COC(=O)C)C(O)C2O	UNPD=UNPD179907,COCONUT=CNP0289355	0.0017074	0.00233824	0.00268329	0	0	0	0.00219628	0	0	0	0	0	0.000851595	0	0	0	0	0	0	0	0	0	0
303	neg_936	Simple ID		1	neg	936	8.326	285.072	[M-H]-	generic	C11H14N2O7	UNPD179907	6.4808	6.4808	Unknown	3	36	285.072	[M-H]-	286.08	0.0005243	3.638	Pyrimidine nucleosides	KTMVKCZHYODLLY-ATQLEGSONA-N	O=C1C=CN(C(=O)N1)C2OC(COC(=O)C)C(O)C2O	UNPD=UNPD179907,COCONUT=CNP0289355	0.000665301	0.000849262	0.000986205	0	0	0	0.0010323	0.00095145	0	0	0	0	0.000370549	0	0	0	0	0	0	0	0	0	0
304	neg_937	Simple ID		1	neg	937	0.994	285.072	[M-H]-	generic	C11H14N2O7	UNPD179907	6.8078	6.8078	Unknown	3	48	285.072	[M-H]-	286.08	0.0004243	3.824	Pyrimidine nucleosides	KTMVKCZHYODLLY-ATQLEGSONA-N	O=C1C=CN(C(=O)N1)C2OC(COC(=O)C)C(O)C2O	UNPD=UNPD179907,COCONUT=CNP0289355	0.00227152	0.00216468	0.00241174	0	0	0	0.00097385	0.00144577	0.00208598	0	0	0	0.00084301	0.000993937	0.00102652	0.00110864	0	0	0	0	0	0	0
305	neg_938	Simple ID		1	neg	938	8.401	285.073	[M-H]-	generic	C11H14N2O7	UNPD179907	6.6695	6.6695	Unknown	3	42	285.072	[M-H]-	286.08	0.0003243	3.755	Pyrimidine nucleosides	KTMVKCZHYODLLY-ATQLEGSONA-N	O=C1C=CN(C(=O)N1)C2OC(COC(=O)C)C(O)C2O	UNPD=UNPD179907,COCONUT=CNP0289355	0	0	0	0	0	0	0	0	0.000969084	0	0	0	0	0.000396719	0.000417699	0.000387261	0	0	0	0.000933978	0.000925606	0.000760993	0
306	neg_939	Simple ID		1	neg	939	4.047	285.073	[M-H]-	generic	C11H14N2O7	UNPD179907	7.5236	7.5236	Unknown	3	24	285.073	[M-H]-	286.08	0.0002243	4.311	Pyrimidine nucleosides	KTMVKCZHYODLLY-ATQLEGSONA-N	O=C1C=CN(C(=O)N1)C2OC(COC(=O)C)C(O)C2O	UNPD=UNPD179907,COCONUT=CNP0289355	0	0	0	0	0	0	0	0	0	0	0	0	0	0.000884744	0.00091109	0.00090058	0	0	0	0	0	0	0
307	neg_492	Simple ID	Other possible annotated peaks for this cluster.	2	neg	492	16.522	241.144	[M-H]-	generic	C13H22O4	A factor	5.3043	5.3043	Unknown	3	18	241.144	[M-H]-	242.152	3.27e-05	3.174	Gamma butyrolactones	REAWNMHCBIUKLZ-PUPNTHPHNA-N	O=C1OCC(CO)C1C(=O)CCCCC(C)C	KNApSAcK=C00000373,ChEBI=CHEBI:73982,UNPD=UNPD162561,NPA=NPA024717,COCONUT=CNP0266944	0.000947379	0.000877682	0.00102374	0	0	0	0.00111638	0.000964325	0.000997326	0	0	0	0.000332146	0.000330436	0.000338684	0.000346356	0	0	0	0	0	0	0
308	neg_978	Simple ID		1	neg	978	0.996	288.122	[M-H]-	generic	C12H15N7O2	8-{[3-(1H-imidazol-1-yl)propyl]amino}-3-methyl-2,3,6,7-tetrahydro-1H-purine-2,6-dione	3.5889	3.5889	Unknown	3	31	288.122	[M-H]-	289.129	-0.0003537	2.185	Xanthines	VRZBFQIQVLEXKS-UHFFFAOYSA-N	O=C1NC(=O)N(C=2N=C(NC12)NCCCN3C=NC=C3)C	COCONUT=CNP0372850	0.000578319	0.000616486	0.000557077	0	0.000149951	0.000261859	0	0.000441356	0.000523721	0.000662213	0	0.000560064	0.000519275	0.000522142	0.000555873	0	0.000201851	0.000180673	0.000229849	0	0	0	0
309	neg_986	Unknown compound		1	neg	986	18.91	290.196	[M+FA-H]-																		0	0	0	0.000434693	0	0.000161761	0	0	0	0	0	0	0.000529313	0.000538657	0.000567973	0.000580483	0.00208827	0.00322121	0.00237753	0	0	0	0
310	neg_989	Simple ID		1	neg	989	8.883	291.098	[M-H]-	generic	C14H16N2O5	3-(4-hydroxyphenyl)-2-[(5-oxopyrrolidin-2-yl)formamido]propanoic acid	5.8109	5.8109	Unknown	3	36	291.098	[M-H]-	292.106	0.0002452	3.501	Dipeptides	ILJOYLTXYCZXTB-UHFFFAOYSA-N	O=C(O)C(NC(=O)C1NC(=O)CC1)CC2=CC=C(O)C=C2	COCONUT=CNP0411198	0.000346603	0.000433415	0.000408943	0.000474246	0.000540453	0	0	0	0	0	0	0	0.000477599	0	0	0	0	0	0	0	0	0	0
311	neg_990	Simple ID		1	neg	990	8.996	291.099	[M-H]-	generic	C14H16N2O5	(2S,4S)-Monatin	5.6812	5.6812	Unknown	3	41	291.099	[M-H]-	292.106	0.0001452	3.355	Alpha amino acids	RMLYXMMBIZLGAQ-UHFFFAOYNA-N	O=C(O)C(N)CC(O)(C(=O)O)CC1=CNC=2C=CC=CC21	HMDB=HMDB0041309,KNApSAcK=C00026720,FooDB=FDB021228,UNPD=UNPD114195;UNPD32033,BLEXP=BLEXPDB00009860847,COCONUT=CNP0166951	0	0	0	0	0	0	0	0	0	0	0	0	0	0.000473621	0.000504937	0.000504706	0.000264749	0.000239228	0.000206553	0.000755105	0.000774694	0.000892029	0
312	neg_994	Unknown compound		1	neg	994	16.258	291.147	[M-H]-																		0	0	0	0.00114943	0.0011475	0.00112673	0	0	0	0	0	0	0.000459671	0.000437687	0.00045354	0.000428295	0	0	0	0	0	0	0
313	pos_10003	Unknown compound		1	pos	10003	8.456	593.244	[M+2H]2+																		0	0	0	0.000461526	0.00050327	0.000505181	0	0	0	0	0	0	0	6.39091e-05	5.98544e-05	6.16888e-05	0	0	0	0	0	0	0
314	pos_1003	Simple ID		1	pos	1003	11.043	183.112	[M+H]+	generic	C9H14N2O2	UNPD106579	4.8323	4.8323	Unknown	3	34	183.112	[M+H]+	182.106	0.0008041	2.537	Alpha amino acids and derivatives	BTRFIVPVBRRXKJ-JLDDOWRYNA-N	O=C1NC(C(=O)NC1=C)CC(C)C	UNPD=UNPD106579;UNPD74799,NPA=NPA013515,COCONUT=CNP0230386	0	0	0.000203309	0	8.71564e-05	0	0.000291335	0.000236924	0.000243959	0.000141523	0	0	0.000139817	0.000141419	0	0	0.000142055	0.00011399	0	0.000253785	0.000258831	0	0
315	pos_1009	Simple ID		1	pos	1009	12.063	183.149	[M+H]+	generic	C10H18N2O	CNP0440319	6.1983	6.1983	Unknown	3	36	183.149	[M+H]+	182.142	0.0001896	3.733	Piperidinecarboxamides	OHIZEZVQYGIFHK-UHFFFAOYSA-N	O=C(NCC)C12CCN(CC1)CC2	COCONUT=CNP0440319	0.000417779	0.000395274	0.000451942	0.000276972	0.000241873	0.000267272	0.000699793	0.000657425	0.000685919	0.000380534	0.000407803	0.000391304	0.000297282	0.000325575	0.000352282	0.000356127	0.000310421	0.000262211	0.000338069	0.000605069	0.000645457	0.000544929	8.83847e-05
316	pos_1010	Simple ID		1	pos	1010	11.619	183.149	[M+H]+	generic	C10H18N2O	1-(4-ethyl-5-propyl-4,5-dihydro-1H-pyrazol-1-yl)ethan-1-one	6.1416	6.1416	Unknown	3	28	183.149	[M+H]+	182.142	-1.04e-05	3.722	Pyrazolines	NEUXBCKEBORMDH-UHFFFAOYSA-N	O=C(N1N=CC(CC)C1CCC)C	COCONUT=CNP0042619	0.000802235	0.000768557	0.000827408	0.000327346	0.000289854	0.000321437	0.00099228	0.000892765	0.000981595	0.000548105	0.000645156	0.000592115	0.000448996	0.000469056	0.000498889	0.000497031	0.000343226	0	0.00030754	0.000798796	0.000876579	0.000729183	9.41221e-05
317	pos_10102	Simple ID		1	pos	10102	21.233	597.301	[M+Na]+	generic	C32H46O9	Ganoderic acid K	5.1926	5.1926	Unknown	3	27	597.301	[M+Na]+	574.314	0.0027038	2.803	Triterpenoids	OEHYQHPDUCRLMW-UHFFFAOYNA-N	O=C(OC1C(=O)C2=C(C(O)CC3C2(C)CCC(O)C3(C)C)C4(C(=O)CC(C(C)CC(=O)CC(C(=O)O)C)C14C)C)C	HMDB=HMDB0035986,KNApSAcK=C00023830;C00024060,FooDB=FDB014792,UNPD=UNPD12048;UNPD136811;UNPD199401,NPA=NPA001084,COCONUT=CNP0181224	0	0	0	0.000309173	0.000395582	0.000375634	0	0	0	0	0	0	6.00467e-05	5.96297e-05	0	0	0	0	0	0	0	0	0
318	pos_1020	Simple ID		1	pos	1020	21.573	184.133	[M+H]+	generic	C10H17NO2	3alpha-Acetoxytropane;; Acetyltropine; O-Acetyltropine; Tropan-3a-ol acetate (ester); Tropine acetate (ester); Tropyl acetate; endo-3-Acetoxy-8-methyl-8-azabicyclo[3.2.1]octane	5.4136	5.4136	Unknown	3	36	184.132	[M+H]+	183.126	0.0007052	3.084	Tropane alkaloids	MDIDMOWWLBGYPG-MYJAWHEDNA-N	O=C(OC1CC2N(C)C(CC2)C1)C	KNApSAcK=C00025551;C00025556,ChEBI=CHEBI:31167;CHEBI:31170,NANPDB=NANPDB_3722,PubChem=103008,UNPD=UNPD104936;UNPD195000,COCONUT=CNP0313035	0	0	0	0.000410954	0.000964296	0.000786087	0	0	0	0	0	0	9.62718e-05	0.000107946	0.000101627	0.000109881	0	0	0	0	0	0	0
319	pos_10261	Simple ID		2	pos	10261	26.847	605.424	[M+H]+	generic	C32H60O10	2-[2-[3,4-bis(2-hydroxyethoxy)oxolan-2-yl]-2-(2-hydroxyethoxy)ethoxy]ethyl (E)-octadec-9-enoate	6.2907	6.2907	Unknown	3	14	605.424	[M+H]+	604.419	0.0020246	3.28	Fatty acid esters	HDTIFOGXOGLRCB-MDZDMXLPSA-N	O=C(OCCOCC(OCCO)C1OCC(OCCO)C1OCCO)CCCCCCCC=CCCCCCCCC	BLEXP=BLEXPDB00005281955,COCONUT=CNP0189358	0	0	0	0	4.03542e-05	4.56746e-05	0.00014705	0.000590231	0.000436176	0	0	0	8.7589e-05	9.02805e-05	8.79834e-05	8.80357e-05	7.44291e-05	8.14514e-05	0	0	0	0	0
320	pos_1029	Simple ID		1	pos	1029	1.872	185.092	[M+H]+	generic	C8H12N2O3	UNPD130006	6.6995	6.6995	Unknown	3	36	185.092	[M+H]+	184.085	0.0004687	3.709	Alpha amino acids and derivatives	JBVUOARNEYAAOS-DWFKHXNSNA-N	O=C1NC(C(=O)N2CC(O)CC12)C	UNPD=UNPD130006;UNPD26844;UNPD224854,NPA=NPA004095;NPA017614,COCONUT=CNP0201134	0.000108639	0.000105678	0.000118399	5.67766e-05	0	5.43521e-05	0.000351405	0.000239709	0.000243132	8.78296e-05	8.91471e-05	0.000357249	0.000122217	0.000130189	0.000133483	0	0.000119435	9.97451e-05	0.00010507	0	0	0	0
321	pos_10325	Simple ID		1	pos	10325	35.621	610.184	[M+H]+	generic	C33H28ClN5O5	ethyl 4-[1-(4-chlorophenyl)-5-(4-methylphenyl)-4,6-dioxo-1H,3aH,4H,5H,6H,6aH-pyrrolo[3,4-c]pyrazole-3-carbonyl]-5-methyl-1-(4-methylphenyl)-1H-pyrazole-3-carboxylate	4.4908	4.4908	Unknown	3	46	610.184	[M+H]+	609.178	0.0015731	2.913	Phenylpyrazoles	RHZKIDADPZWQRJ-UHFFFAOYSA-N	O=C(OCC)C1=NN(C2=CC=C(C=C2)C)C(=C1C(=O)C3=NN(C4=CC=C(Cl)C=C4)C5C(=O)N(C(=O)C35)C6=CC=C(C=C6)C)C	COCONUT=CNP0059154	0	0	0	0	0	0	0	0	0	0	0	0	0	0	0	0.000248925	0	0	0	0	0.000300087	0.000272913	0.000108718
322	pos_10331	Unknown compound		1	pos	10331	11.105	610.292	[M+2H]2+																		0	0	0	0	0	0	0	0	0	0	0	0	0.000238205	0.000283693	0.000264506	0.000234822	0	0	0	0	0	0	0
323	pos_10340	Unknown compound		1	pos	10340	12.253	610.353	[M+H]+																		0	0	0	0	0	0	0	0	0	0	0	0	0.000333124	0.000323263	0.00028182	0.000325389	0	0	0	0	0	0	0
324	pos_10364	Unknown compound		1	pos	10364	13.735	611.774	[M+2H]2+																		0	0	0	0	0	0	0	0	0	0	0	0	0.000267812	0.000320436	0.000304303	0.00030667	0	0	0	0	0	0	0
325	pos_1037	Simple ID		1	pos	1037	10.095	185.128	[M+H]+	generic	C9H16N2O2	UNPD105821	6.8527	6.8527	Unknown	3	23	185.128	[M+H]+	184.121	0.0002542	3.943	Alpha amino acids and derivatives	DBJPZCJQDRPOME-JHPDDGAFNA-N	O=C1NC(C(=O)NC1C)CC(C)C	UNPD=UNPD105821;UNPD138886,NPA=NPA014068,COCONUT=CNP0222514	0.00135697	0.00136283	0.00135114	0.000794773	0.000866151	0.000812056	0.00217918	0.00190425	0.00203345	0.00106054	0.00138879	0.00117283	0.00106852	0.0011757	0.00129624	0.00127488	0.00101802	0.000872852	0.00112496	0.00215669	0.00197307	0.00175762	0.000308645
326	pos_1038	Simple ID		1	pos	1038	10.421	185.128	[M+H]+	generic	C9H16N2O2	UNPD105821	7.5998	7.5998	Unknown	3	26	185.128	[M+H]+	184.121	0.0001542	4.462	Alpha amino acids and derivatives	DBJPZCJQDRPOME-JHPDDGAFNA-N	O=C1NC(C(=O)NC1C)CC(C)C	UNPD=UNPD105821;UNPD138886,NPA=NPA014068,COCONUT=CNP0222514	0.00125457	0.00115885	0.00137119	0.000708953	0.000677826	0.000729137	0.00194142	0.00180943	0.00193469	0.0011216	0.00142329	0.00119853	0.000937455	0.00108086	0.00119842	0.00115951	0.00105219	0.000780349	0.00105176	0.00166199	0.00169597	0.00132502	0.000231651
327	pos_10391	Unknown compound		1	pos	10391	10.745	612.554	[M+4H]4+																		0	0	0	0	0	0	0	0	0	0	0	0	0.000259272	0.00027389	0.000286724	0.000274731	0	0	0	0	0	0	0
328	pos_10417	Simple ID		1	pos	10417	20.877	614.306	[M+H]+	generic	C32H43N3O9	2-{1,10-dihydroxy-9a,11a-dimethyl-7-oxo-1H,2H,3H,3aH,3bH,4H,5H,7H,8H,9H,9aH,9bH,10H,11H,11aH-cyclopenta[a]phenanthren-1-yl}-2-oxoethyl 3-{[3-(1H-imidazol-4-yl)-1-methoxy-1-oxopropan-2-yl]carbamoyl}propanoate	4.7021	4.7021	Unknown	3	68	614.306	[M+H]+	613.3	0.0010064	2.791	Gluco/mineralocorticoids, progestogins and derivatives	HBQDVVGLWGQNCP-UHFFFAOYSA-N	O=C(OCC(=O)C1(O)CCC2C3CCC4=CC(=O)CCC4(C)C3C(O)CC21C)CCC(=O)NC(C(=O)OC)CC=5N=CNC5	COCONUT=CNP0386330	0	0	0	0	0	0	0	0	0	0	0	0	6.73192e-05	6.86763e-05	6.29499e-05	8.42989e-05	0.000759438	0.000331496	0.000620122	0	0	0	0
329	pos_10530	Simple ID	Other possible annotated peaks for this cluster.	3	pos	10530	27.664	619.436	[M+Na]+	generic	C38H60O5	Madhucic acid	6.5738	6.5738	Unknown	3	11	619.436	[M+Na]+	596.444	-0.0026043	3.416	Triterpenoids	JKDKWICYSPHZGM-MNGPTGSQNA-N	O=C(OC1CCC2(C)C3C(=O)C=C4C5CC(C)(C)CCC5(C(=O)O)CCC4(C)C3(C)CCC2C1(C)C)CCCCCCC	KNApSAcK=C00019714,UNPD=UNPD149810,COCONUT=CNP0406659	0	0	0	6.01534e-05	0.000105794	0.000101941	0.000332218	0.00101985	0.000713938	6.76247e-05	0	0	0.000153878	0.000148	0.000161309	0.000162675	0.000119211	0.000144436	0	0	0	0.000101443	5.00549e-05
330	pos_10438	Simple ID		1	pos	10438	21.324	615.261	[M+H]+	generic	C36H38O9	12-(hydroxymethyl)-13-(2-methoxyethyl)-6-methyl-14,21-dioxo-22-(propan-2-ylidene)-7,15,20-trioxapentacyclo[23.3.1.0?,??.0?,??.0??,??]nonacosa-1(28),8,10,12,16,25(29),26-heptaen-3-yn-18-yl acetate	5.6901	5.6901	Unknown	3	50	615.261	[M+H]+	614.252	-0.0022408	3.289	Angular pyranocoumarins	WXQJPFPZLYIKJP-UHFFFAOYSA-N	O=C1OC2=C(C=CC=3OC4(C)CC#CCC5=CC=CC(=C5)CCC(C(=O)OC4C(OC(=O)C)C32)=C(C)C)C(=C1CCOC)CO	COCONUT=CNP0269526	7.31416e-05	5.75015e-05	0	0	0	0	0.000172727	0.000174952	0.000111747	5.87094e-05	0.000230299	0.000148843	7.97628e-05	7.56495e-05	7.06624e-05	8.12153e-05	6.62472e-05	5.81428e-05	0.000126835	0.000239993	0.000764435	0.00028817	0
331	pos_10475	Simple ID		1	pos	10475	13.983	617.332	[M+H]+	generic	C35H44N4O6	Chondramide C	6.8366	6.8366	Unknown	3	65	617.332	[M+H]+	616.326	0.0016616	3.715	Dipeptides	NCRSWJPOFRASIF-HKWRFOASNA-N	O=C1OC(C)C(C=C(C)CC(C(=O)NC(C(=O)N(C)C(C(=O)NC(C2=CC=C(O)C=C2)C1)CC3=CNC=4C=CC=CC43)C)C)C	KNApSAcK=C00016607,ChEBI=CHEBI:84382,UNPD=UNPD165307,NPA=NPA001805,COCONUT=CNP0213809	0	0	0	0	0	0	0	0	0	0	0	0	0.00018806	0.000181244	0.000152291	0.000189335	0	0	0	0	0	0	0
332	pos_10524	Simple ID		1	pos	10524	14.639	619.244	[M+Na]+	generic	C35H36N2O7	1'-(6-aminopyridin-3-yl)-6-(3-hydroxypropyl)-3'-methyl-7-oxo-3,3',4',7-tetrahydro-1'H-spiro[furo[3,2-g]chromene-2,2'-naphthalen]-3'-yl 2-(2-hydroxyethyl)but-2-enoate	6.1658	6.1658	Unknown	3	75	619.244	[M+Na]+	596.252	-0.0023278	3.41	Psoralens	FFSTVVJLWJSPGL-UHFFFAOYSA-N	O=C1OC=2C=C3OC4(CC3=CC2C=C1CCCO)C(C5=CN=C(N)C=C5)C=6C=CC=CC6CC4(OC(=O)C(=CC)CCO)C	COCONUT=CNP0416276	0.000132911	8.8079e-05	8.78634e-05	8.32673e-05	6.37839e-05	6.65389e-05	0.000100469	9.87597e-05	9.94281e-05	7.67628e-05	0.000101575	7.91463e-05	6.71657e-05	7.59681e-05	6.46832e-05	7.41822e-05	7.35488e-05	0	5.89498e-05	0.000913412	0.000666705	0.000101892	0
333	pos_10663	Unknown compound		1	pos	10663	15.523	627.346	[M+H]+																		0	0	0	0	0	0	0	0	0	0	0	0	9.68888e-05	0.000103051	7.63616e-05	9.31315e-05	0	0	0	0	0	0	0
334	pos_10728	Unknown compound		1	pos	10728	25.863	630.479	[M+H]+																		0	0	0	0	4.70086e-05	4.81812e-05	0.000121554	0.000908491	0.00079232	5.10033e-05	0	0	0.000128601	0.000109739	0.000122477	0.000108425	0.000104688	0.000117043	0	0	0	0	0
335	pos_10743	Simple ID		1	pos	10743	22.729	631.34	[M+Na]+	generic	C32H52N2O7S	cuniculene 6b	6.0086	6.0086	Unknown	3	42	631.34	[M+Na]+	608.35	-0.0009563	3.296	Fatty acyl thioesters	GHQBYAGYCOKTAX-UHFFFAOYSA-N	O=C(SCCNC(=O)CCNC(=O)C(O)C(C)(C)CO)CC(=C)C=CCC(=C)C=CC(C)C(O)CC(O)CC(=C)CC	COCONUT=CNP0426903	0.00119475	0.00106799	0.00123442	0	0	0	0	0	0	0	0	0	0.00011477	7.51101e-05	7.14048e-05	0	0	0	0	0	0	0	0
336	pos_10776	Unknown compound		2	pos	10776	28.51	633.454	[M+Na]+																		0	0	0	7.3711e-05	0.000130542	0.000119051	0.000325081	0.000864384	0.000471197	5.43865e-05	6.55631e-05	0	0.000131072	0.000144981	0.000119283	0.00013902	8.00034e-05	0.000113932	0	0	0	8.95702e-05	7.09425e-05
337	pos_1079	Simple ID		1	pos	1079	14.78	188.164	[M+H]+	generic	C10H21NO2	7-aminodecanoic acid	7.1551	7.1551	Unknown	3	27	188.164	[M+H]+	187.157	0.0007054	4.135	Medium-chain fatty acids	NRKKNXXLTISZHH-UHFFFAOYSA-N	O=C(O)CCCCCC(N)CCC	COCONUT=CNP0362333	0	0	0	0.000255624	0.000489664	0.000384563	0	0	0	0	0	0	0.000102193	0.000103371	9.39201e-05	9.31471e-05	0.000234345	0.00039132	0.000289396	0	0	0	0
338	neg_3133	Simple ID		3	neg	3133	15.022	634.323	[M-H]-	generic	C34H45N5O7	Cotteslosin A	6.032	6.032	Unknown	3	31	634.323	[M-H]-	635.332	0.0013223	3.058	Cyclic peptides	VADXJHCQZHEEOX-UHFFFAOYNA-N	O=C1NC(C(=O)N(C)C(C(=O)NC(C(=O)N2CCCC2C(=O)NC1C(C)C)CC3=CC=C(O)C=C3)CC4=CC=C(O)C=C4)C(C)C	KNApSAcK=C00047428,UNPD=UNPD167063,NPA=NPA015439,COCONUT=CNP0204811	0	0	0	0	0	0	0	0	0	0	0	0	0.000355273	0.000361081	0.00036692	0.000368353	0	0	0	0	0	0	0
339	pos_10957	Unknown compound		1	pos	10957	14.72	644.289	[M+H]+																		0	0	0	0	0	0	0.000362346	0.00031967	0.000287648	0	0	0	0.000180864	0.000171645	0.000145615	0.000166807	0	0.000314525	0.000302158	0	0	0	0
340	pos_10958	Unknown compound		1	pos	10958	14.443	644.289	[M+H]+																		0.00113115	0.00177038	0.00120208	0.00191202	0.00184741	0.00180442	0	0	0	0.000777857	0.000598044	0.000391889	0.00102348	0.00102823	0.000950222	0.00107057	0.00357683	0.00305881	0.0036305	0.000163818	0.000184555	0.000535175	0
341	pos_1097	Simple ID		1	pos	1097	16.88	190.086	[M+H]+	generic	C11H11NO2	Indole-3-propionic acid	8.0387	8.0387	Unknown	3	17	190.085	[M+H]+	189.079	0.000755	4.542	Indolyl carboxylic acids and derivatives	GOLXRNDWAUTYKT-UHFFFAOYSA-N	O=C(O)CCC1=CNC=2C=CC=CC21	HMDB=HMDB0002302,KNApSAcK=C00000115,ChEBI=CHEBI:43580;CHEBI:82916,DrugBank=DB02758,FooDB=FDB000941,BMDB=BMDB02302,Saliva=HMDB0002302,Feces=HMDB0002302,Serum=HMDB0002302,PubChem=3744,UNPD=UNPD38086,BLEXP=BLEXPDB00000003744,COCONUT=CNP0213541	0.000277177	0.00029414	0.000299599	0.00013347	0.000151532	0.000115245	0.00035459	0.000319775	0.000307052	0.00027653	0.000234714	0.000284552	0.000176427	0.000205525	0.000173076	0.000218051	0.000165707	0.000145648	0.000178298	0.000290079	0.000361863	0.000312636	6.95586e-05
342	pos_10970	Unknown compound		1	pos	10970	26.694	644.492	[M+H]+																		0	0	7.80125e-05	0.000110988	0.000232876	0.000265604	0.000752137	0.00331746	0.00258911	0.000164195	0	0	0.000543114	0.000490678	0.000440667	0.000455315	0.000322409	0.000373392	0.000106636	0	0	0.0001117	6.55759e-05
343	pos_11006	Simple ID	Other possible annotated peaks for this cluster.	4	pos	11006	13.67	646.377	[M+H]+	generic	C36H55NO7S	UNPD25004	5.937	5.937	Unknown	3	72	646.377	[M+H]+	645.37	-9.94e-05	3.461	Thiazoles	DCJUWXLPEQBGGN-LFVISMLZNA-N	O=C1OC(CC=C(C=CC(O)CC(O)C(C2=NC(=CS2)C=C1CCCCCC)C)C)C(O)C(O)C(C)C(O)C(=CC(=CC)C)C	UNPD=UNPD25004,NPA=NPA005050,COCONUT=CNP0114998	0	0	0	0	0	0	0	0	0	0	0	0	0.000155756	0.000148652	0.000134312	0.000162812	0	0	0	0	0	0	0
344	pos_11112	Simple ID	Other possible annotated peaks for this cluster.	4	pos	11112	13.814	652.407	[M+H]+	generic	C35H57NO10	UNPD130154	6.2859	6.2859	Unknown	3	56	652.407	[M+H]+	651.398	-0.0018765	3.549	Aminoglycosides	BXRFQJOFRKZZPI-AKEHASKYNA-N	O=CCC1CC(C(=O)C=CC2(OC2C(C)C(OC(=O)CC(O)C(C)C1OC3OC(C)CC(N(C)C)C3OC(=O)CCC)CC)C)C	UNPD=UNPD130154,COCONUT=CNP0167100	0.00029013	0.000309607	0.000325918	0.000111812	0.000131216	0.000149615	0.000297011	0.000237682	0.000256642	0.000402112	0.000379279	0.000300876	0.000723073	0.000650048	0.000637255	0.000645453	0.000161815	0.00588732	0.000204387	0.000286647	0.000232158	0.000332096	7.48294e-05
345	pos_1112	Simple ID		1	pos	1112	9.931	191.154	[M+H]+	generic	C12H18N2	1-methyl-3-phenylpiperidin-3-amine	4.922	4.922	Unknown	3	42	191.154	[M+H]+	190.147	0.000375	2.56	Phenylpiperidines	LWZZWIMYSXGPCF-UHFFFAOYSA-N	NC1(C=2C=CC=CC2)CN(C)CCC1	COCONUT=CNP0149775	0.000130803	0.000131145	0.000142454	7.67987e-05	8.40262e-05	8.2951e-05	0.000200272	0.000188084	0.000204262	0	0.000153363	0	0	8.80938e-05	8.31649e-05	9.76446e-05	6.3679e-05	5.18814e-05	0	0.000106026	0.000105099	0	0
346	pos_11126	Unknown compound		1	pos	11126	16.002	653.257	[M+2H]2+																		0	0	0	0	0	0	0.00266134	0.00349324	0.00247832	0	0	0	0.000508701	0.00049212	0.00044497	0.000522819	0	0	0	0	0	0	0
347	pos_11164	Simple ID		1	pos	11164	10.277	655.339	[M+H]+	generic	C39H46N2O7	UNPD85096	5.4178	5.4178	Unknown	3	95	655.339	[M+H]+	654.331	-0.0013217	3.559	Benzylisoquinolines	DXXYTRVGRHKWQU-AGZKVVJFNA-N	[O-][N+]1(C)CCC2=CC(OC)=C(OC)C=C2C1CC3=CC=C(OC)C(OC4=CC=C(C=C4)CC5C6=CC(OC)=C(OC)C=C6CCN5C)=C3	UNPD=UNPD85096,COCONUT=CNP0312355	0	0	0	0	0	0	0	0	0	0	0	0	0.000139856	0	0	0	0	0	0	0	0	0	0.000535973
348	pos_11217	Simple ID		1	pos	11217	10.085	658.3	[M+H]+	generic	C34H39N7O7	UNPD24683	6.0448	6.0448	Unknown	3	48	658.3	[M+H]+	657.291	-0.001427	3.609	Oligopeptides	VAXAOZUHJLIFMR-XNUIIPKDNA-N	O=C1NCC(=O)N2CCCC2C(=O)NC(C(=O)NC(C(=O)N3CCCC3C(=O)NC1)CC4=CC=C(O)C=C4)CC5=CNC=6C=CC=CC65	UNPD=UNPD24683,COCONUT=CNP0386193	0.000227186	0.000226716	0.000254843	4.42716e-05	4.08436e-05	4.18234e-05	0	0	0	0	0	0	6.0335e-05	6.84372e-05	7.27832e-05	6.84382e-05	0.000139541	0.000116997	0.000142334	0	0	0	0
349	pos_1122	Simple ID		1	pos	1122	2.503	193.068	[M+2H]2+	generic	C14H20N6O5S	S-Adenosylhomocysteine	6.4397	6.4397	Unknown	3	32	193.068	[M+2H]2+	384.122	-0.0002584	3.696	5'-deoxy-5'-thionucleosides	ZJUKTBDSGOFHSH-WFMPWKQPSA-N	O=C(O)C(N)CCSCC1OC(N2C=NC=3C(=NC=NC32)N)C(O)C1O	HMDB=HMDB0000939,KNApSAcK=C00007230,ChEBI=CHEBI:16680;CHEBI:57856;CHEBI:67009,DrugBank=DB01752,SMPDB=PW_C000749,YMDB=YMDB00198,T3DB=T3D4455,FooDB=FDB022327;FDB031150,BMDB=BMDB00939,Urine=HMDB0000939,Feces=HMDB0000939,ECMDB=ECMDB00939,CSF=HMDB0000939,Serum=HMDB0000939,PubChem=25246222;439155,PlantCyc=ADENOSYL-HOMO-CYS,BLEXP=BLEXPDB00000439155,COCONUT=CNP0339419	0	0	0	0	0	0	0	0	0	0	0	0	0	0	0	0.000419219	0	0	0	0.000180144	0.000201085	0.000215072	0
350	pos_1124	Unknown compound		1	pos	1124	11.766	193.097	[2M+H]+																		0.000118672	0.000139756	0.000161823	0	0	0	0	0	0	0	0	0	0.000113645	0.000101581	0.000107445	9.83151e-05	0	0	0.000100318	0.000476559	0.000606697	0.000886584	0
351	neg_3215	Simple ID		2	neg	3215	19.424	661.319	[M-H]-	generic	C31H46N6O10	Actinoramide B	5.895	5.895	Unknown	3	135	661.319	[M-H]-	662.328	0.0011652	3.472	Hybrid peptides	KUPRIVWXWREGNF-UHFFFAOYSA-N	O=C(NC(C(=O)N1NCCCC1C(=O)NC(CC=2C=CC=CC2)C(O)C(O)C(=O)NC3C(=O)N(C(=O)C)CC3)C(O)C(C)C)COC	COCONUT=CNP0245462	0.00515158	0.00631824	0.00467035	0	0	0	0	0	0	0	0	0	0.000415543	0.000514864	0.000509718	0.000504659	0	0	0	0	0	0	0
352	pos_11310	Unknown compound		1	pos	11310	10.009	663.793	[M+H]+																		0	0	0	0	0	0	0	0	0	0.000287263	0.000375696	0.00042899	0	5.51174e-05	0	0	0	0	0	0.00012709	0	0.000513053	0
353	pos_11337	Unknown compound		1	pos	11337	11.157	665.324	[M+2H]2+																		0	0	0	0	0	0	0	0	0	0.000141874	0.000178398	0.000246798	0	6.18209e-05	0	0	0	0	0	0	0	0.000448075	0
354	pos_1140	Simple ID		1	pos	1140	10.517	193.169	[M+H]+	generic	C12H20N2	UNPD51990	5.8175	5.8175	Unknown	3	39	193.169	[M+H]+	192.163	0.0009251	3.085	Pyrazines	HBNTYRSZFUEIEX-SVGMAFHSNA-N	N=1C(=C(N=C(C1C)CC(C)CC)C)C	UNPD=UNPD51990,COCONUT=CNP0179581	0.000213153	0.000231488	0.000249576	0.000153961	0.00014072	0.000136395	0.000267019	0.000228895	0.00027176	0	0.000279348	0	0.000172609	0.000176835	0	0.000169893	0.000109342	6.05639e-05	0.000118041	0	0	0	0
355	pos_11410	Simple ID		1	pos	11410	9.134	669.318	[M+H]+	generic	C39H44N2O8	3-(14,16-dihydroxy-3-methyl-1,7-dioxo-3,4,5,6,7,8,9,10-octahydro-1H-2-benzoxacyclotetradecin-15-yl)-3-(4-methoxyphenyl)-N-[2-oxo-2-(1,2,3,4-tetrahydroisoquinolin-2-yl)ethyl]propanamide	5.9246	5.9246	Unknown	3	78	669.318	[M+H]+	668.31	-0.0010572	3.713	Zearalenones	DFUYBMBHWYYIAG-UHFFFAOYSA-N	O=C1OC(C)CCCC(=O)CCCC=CC=2C=C(O)C(=C(O)C12)C(C3=CC=C(OC)C=C3)CC(=O)NCC(=O)N4CC=5C=CC=CC5CC4	COCONUT=CNP0381884	0	0	0	0	0	0	0	0	0	0	0.00014169	0.000120289	6.10307e-05	6.29901e-05	5.95077e-05	6.74998e-05	0	0	0	0.000662567	0.000508787	0.00152241	0
356	pos_1143	Simple ID		1	pos	1143	9.546	193.169	[M+H]+	generic	C12H20N2	UNPD171672	7.8289	7.8289	Unknown	3	24	193.169	[M+H]+	192.163	0.0008251	4.227	Pyrazines	KYVXEZPQRULTLX-UHFFFAOYSA-N	N=1C(=C(N=C(C1C)CCC(C)C)C)C	UNPD=UNPD171672,COCONUT=CNP0160776	0.000727358	0.000750176	0.000776566	0	0.0005311	0.000487391	0.000963159	0	0.000951168	0	0.000908786	0.000808351	0.000571091	0.000610271	0.00057162	0.000627377	0.000275383	0.000127983	0.000297156	0.00121682	0	0.00105711	0
357	pos_11431	Unknown compound		1	pos	11431	10.56	670.282	[M+H]+																		0	0	0	0	0	0	0	0	0	0.000172984	0.000276542	0.000362758	0.000137575	0.000158664	0.000157146	0	0	0	0	0.00127901	0.00103682	0.000817064	0
358	pos_11520	Simple ID	Other possible annotated peaks for this cluster.	4	pos	11520	12.102	674.382	[M+Na]+	generic	C42H53NO5	9'-[4-(1,2,3,4,4a,8a-hexahydronaphthalen-1-yl)-1-hydroxybutylidene]-4-(3-aminopropyl)-11'-(2-cyclohexylethyl)-3H-8'-oxaspiro[2-benzofuran-1,10'-tricyclo[4.3.2.0?,?]undecan]-4'-ene-3,7'-dione	5.4342	5.4342	Unknown	3	74	674.382	[M+Na]+	651.392	-0.0005055	3.198	Benzofuranones	LHWYNCRQYKGSAB-UHFFFAOYSA-N	O=C1OC2(C=3C=CC=C(C13)CCCN)C(CCC4CCCCC4)C56C=CCCC26C(OC5=O)=C(O)CCCC7CCCC8C=CC=CC87	COCONUT=CNP0120977	0	0	0	0	0	0	0	0	0	0	0	0	0.000634489	0.000746533	0.000733289	0.000741751	0	0	0	0	0	0	0
359	pos_11523	Unknown compound		1	pos	11523	25.767	674.503	[M+H]+																		0	0	0	0	4.10928e-05	0	0	0.000511931	0.000429081	0	0	0	6.3303e-05	6.005e-05	6.37654e-05	6.42026e-05	5.48395e-05	6.97733e-05	0	0	0	0	0
360	pos_11539	Simple ID		1	pos	11539	16.625	675.343	[M+H]+	generic	C34H50N4O8S	Microginin 674	5.148	5.148	Unknown	3	89	675.343	[M+H]+	674.335	-0.001188	2.986	Peptides	GJBJEYLYOBIKHD-IIZANFQQSA-N	O=C(O)C(NC(=O)C(NC(=O)C(N(C(=O)C(O)C(N)CCCCCCC)C)CCSC)CC1=CC=C(O)C=C1)CC2=CC=C(O)C=C2	NPA=NPA022551,COCONUT=CNP0258335	0	0	0	0	0	0	0	0	0	0	0	0	0.00020878	0.000190788	0.000195695	0.00021665	0	0	0	0	0	0	0
361	pos_11569	Simple ID		1	pos	11569	28.306	677.479	[M+H]+	generic	C43H64O6	UNPD156720	6.5646	6.5646	Unknown	3	20	677.479	[M+H]+	676.47	-0.0015338	3.445	Triterpenoids	YSLGSLCOQHKVJK-HNTTZFHUNA-N	O=C(OC1CCC2(C)C3C(=CCC2C1(C)C)CC4(C)CCC5C(C)(C)C(OC(=O)CCC6=CC=C(OC)C(OC)=C6)CCC5(C)C4CC3)C	UNPD=UNPD156720,COCONUT=CNP0197866	0	0	0	0	8.34444e-05	7.23531e-05	0.000248485	0.00057343	0.000339218	0	0	0	0.000104213	9.53079e-05	0.000104864	9.37775e-05	6.63341e-05	9.14645e-05	0	0	0	7.05116e-05	3.9436e-05
362	pos_11632	Simple ID		1	pos	11632	8.702	681.317	[2M+H]+	generic	C18H20N4O3	Aurantiomide C;(+)-Aurantiomide C	4.3657	4.3657	Unknown	3	79	681.317	[2M+H]+	340.154	-0.0015956	2.302	Quinazolines	UKYRPVOCKVERNT-UVJCFNDCNA-N	O=C(N)CCC1C(=O)NC(=CC(C)C)C2=NC=3C=CC=CC3C(=O)N21	KNApSAcK=C00038534,UNPD=UNPD165522,NPA=NPA000342,COCONUT=CNP0107310	0	0	0	0	0	0	0	0	0	0.00097848	0.000903391	0.00162473	7.52162e-05	7.97941e-05	7.90183e-05	8.55194e-05	0	0	0	0	0	0.000418138	0
363	pos_11690	Unknown compound		1	pos	11690	36.219	684.201	[M+H]+																		0	0	0	0	0	0	0	0	0	0	0	0	0	0	0	8.59307e-05	0	0	0	0	0.000106858	8.19283e-05	3.41435e-05
364	pos_11693	Unknown compound		1	pos	11693	35.961	684.202	[M+H]+																		0	0	0	0	0	0	0	0	0	0	0	0	0	0	8.94098e-05	0	7.75111e-05	5.93157e-05	7.72484e-05	0.000142201	0	0	0
365	pos_11698	Unknown compound		1	pos	11698	11.646	684.335	[M+2H]2+																		0	0	0	0.000184867	0.000190178	0.000224837	0	0	0	0	0	0	0	0	6.45259e-05	0	0	0	0	0	0	0	0
366	pos_11745	Simple ID	Other possible annotated peaks for this cluster.	3	pos	11745	9.653	686.272	[M+Na]+	generic	C40H41NO8	CNP0437554	5.5715	5.5715	Unknown	3	78	686.272	[M+Na]+	663.283	0.000238	3.343	Pyranoflavonoids	LORROZZBNWYETQ-UHFFFAOYSA-N	OC=1C=CC=2C3=C4OC(CO)CCC4=C5OC(C6=CC(OC)=C(O)C(=C6)CCCO)C(O)CC5=C3CC(C2C1)CC=7C=CC8=NCC=C8C7	COCONUT=CNP0437554	0	0	0	0	0	0	0.000264731	0.000202956	0.000212057	0.000175853	0.000297635	0.00050348	0.000154562	0.00017591	0.000195552	0.00019781	0	0	0	0.00110035	0.00120549	0.000480689	0
367	pos_11756	Unknown compound		1	pos	11756	29.16	686.542	[M+H]+																		7.31774e-05	5.87186e-05	9.95039e-05	0.000152569	0.000377968	0.000210958	0.000794921	0.00156571	0.000711702	0.000140211	0.000178965	9.44946e-05	0.000263839	0.000228564	0.000161912	0.00026021	0.000109493	0.000171254	0	0	0	0.000173201	0.000130587
368	pos_11811	Unknown compound		1	pos	11811	16.736	689.343	[M+2H]2+																		0	0	0	0	0	0	0	0	0	0	0	0	9.56488e-05	8.76838e-05	7.5363e-05	7.84832e-05	0	0	0	0	0	0	0
369	pos_11835	Unknown compound		1	pos	11835	11.094	691.329	[M+2H]2+																		0	0	0	0	0	0	0	0	0	0	0	0	0.000125163	0.000130199	0.000127839	0.000130049	0	0	0	0.000927404	0.000808514	0.00110365	0
370	pos_1200	Simple ID		1	pos	1200	21.23	197.117	[M+H]+	generic	C11H16O3	(-)-Loliolide;Loliolide	6.0045	6.0045	Unknown	3	49	197.117	[M+H]+	196.11	0.0003208	3.181	Benzofurans	XEVQXKKKAVVSMW-SMLPMWDWNA-N	O=C1OC2(C(=C1)C(C)(C)CC(O)C2)C	KNApSAcK=C00019144;C00019146;C00038082,ChEBI=CHEBI:69774,FooDB=FDB004536,NANPDB=NANPDB_1515;NANPDB_3845;NANPDB_5536;NANPDB_6103;NANPDB_6833,UNPD=UNPD128463;UNPD141914;UNPD172679;UNPD89001,BLEXP=BLEXPDB00000100332,COCONUT=CNP0245641	0	0	0	0.000747243	0.000647246	0.000630901	0	0	0	0.00028476	0.000359599	0.000389568	0.000233228	0.000201212	0.000203931	0.000218727	0.000199033	0.000137005	0.000217791	0.000623358	0.000805414	0.000295168	0
371	pos_12003	Simple ID		1	pos	12003	14.872	701.309	[M+H]+	generic	C39H44N2O10	CNP0442000	6.0943	6.0943	Unknown	3	105	701.309	[M+H]+	700.3	-0.0018279	3.7	1-benzopyrans	PYLLEIJZYDWGDS-UHFFFAOYSA-N	O=CC1=C(OC=2C(=C(OC)C3=C(OC(C3)C(O)(C)C4CCNCC4)C2CO)C1=C5CC(C(=O)C(CO)C5)C=6C=CC7=NCC=C7C6)C(=O)OCC	COCONUT=CNP0442000	0.000330648	0.000336339	0.000283044	0.000141284	0.000142575	0.000122319	0	0	0	0.000106424	0.000111774	0.000130781	0.000129257	0.000102876	0.00011265	0.000112279	0.000171096	0.000141846	0.000207359	0.000119399	0.000139961	0.000102528	0
372	pos_1201	Simple ID		1	pos	1201	17.613	197.117	[M+H]+	generic	C11H16O3	(-)-Loliolide;Loliolide	7.3343	7.3343	Unknown	3	35	197.117	[M+H]+	196.11	0.0002208	3.747	Benzofurans	XEVQXKKKAVVSMW-SMLPMWDWNA-N	O=C1OC2(C(=C1)C(C)(C)CC(O)C2)C	KNApSAcK=C00019144;C00019146;C00038082,ChEBI=CHEBI:69774,FooDB=FDB004536,NANPDB=NANPDB_1515;NANPDB_3845;NANPDB_5536;NANPDB_6103;NANPDB_6833,UNPD=UNPD128463;UNPD141914;UNPD172679;UNPD89001,BLEXP=BLEXPDB00000100332,COCONUT=CNP0245641	0.00203787	0.0020196	0.0018713	0	0	0	0.00610061	0.00514622	0.00615109	0	0	0	0.00153371	0.00135851	0.00124975	0.00141695	0	0	0	0	0	0	0
373	pos_12013	Unknown compound		1	pos	12013	16.327	701.784	[M+2H]2+																		0	0	0	0	0	0	0.000664	0.000563764	0.00052667	0	0	0	6.91784e-05	7.87991e-05	8.57854e-05	7.6e-05	0	0	0	0	0	0	0
374	pos_1202	Simple ID		1	pos	1202	20.925	197.117	[M+H]+	generic	C11H16O3	(-)-Loliolide;Loliolide	6.4987	6.4987	Unknown	3	41	197.117	[M+H]+	196.11	0.0001208	3.525	Benzofurans	XEVQXKKKAVVSMW-SMLPMWDWNA-N	O=C1OC2(C(=C1)C(C)(C)CC(O)C2)C	KNApSAcK=C00019144;C00019146;C00038082,ChEBI=CHEBI:69774,FooDB=FDB004536,NANPDB=NANPDB_1515;NANPDB_3845;NANPDB_5536;NANPDB_6103;NANPDB_6833,UNPD=UNPD128463;UNPD141914;UNPD172679;UNPD89001,BLEXP=BLEXPDB00000100332,COCONUT=CNP0245641	0.000152018	0.00014554	0.00010766	0.00584468	0.0047712	0.00512958	0.000233585	0	0	0.0024163	0.00306556	0.00290295	0.00179836	0.00158518	0.00153453	0.00161958	0.00258308	0.00157103	0.00278996	0.00279389	0.00383455	0.0014331	0
375	neg_3316	Simple ID		3	neg	3316	11.135	703.306	[M-H]-	generic	C35H48N2O13	UNPD103088	5.6231	5.6231	Unknown	3	66	703.306	[M-H]-	704.316	0.0024631	3.065	Macrolactams	FQFMBUVULBMLGP-AGFCDZHVNA-N	O=C1OC(C(O)C=CC(O)CCOC(=O)CCCCCCC)C(OC(=O)NC(=O)C)C2OC2CCC(=CC(=O)N(C(=O)C=CC=C1)C(=O)C)C	UNPD=UNPD103088,COCONUT=CNP0182489	0	0	0	0	0	0	0	0	0	0	0	0	0.000582421	0.000579488	0.000582247	0.000554427	0	0	0	0	0	0	0
376	pos_11298	Simple ID	Other possible annotated peaks for this cluster.	3	pos	11298	33.928	663.449	[M+H]+	generic	C38H62O9	UNPD104098	6.954	6.954	Unknown	3	20	663.449	[M+H]+	662.439	-0.00224	4.193	Sesterterpenoids	QEJCHDFPOLIOOM-KGVLVSLUNA-N	O=C(O)CCC1(C)C(C(=C)C)CCC2(C)C1CC(OC3OCC(O)C(O)C3OC(=O)C)C4C(CCC42C)C(O)(C)CCC(=C)C(C)C	UNPD=UNPD104098;UNPD38071,COCONUT=CNP0230272	0	0	0	0.000620557	0	0	0.0013962	0.00122095	0.00116195	0	0	0	0	0.00075424	0	0	0	0	0	0	0	0	0
377	pos_12148	Simple ID		1	pos	12148	34.106	708.511	[M+H]+	generic	C46H65N3O3	18'-amino-19'-(hydroxymethyl)-24'-methyl-24'-(3-{4-[1-(methylamino)propan-2-yl]-1H-pyrrol-2-yl}cyclohexyl)-25'-oxaspiro[cyclopentane-1,4'-hexacyclo[20.3.1.1?,?.0?,??.0?,??.0??,??]heptacosane]-8',10',12'-trien-15'-yn-11'-ol	5.9479	5.9479	Unknown	3	15	708.511	[M+H]+	707.503	-0.0008306	3.11	1-hydroxy-2-unsubstituted benzenoids	HDDNNWCXBCBTMU-UHFFFAOYSA-N	OC1=CC=C2C(=C1)CC#CC3C4(OC(C)(C5CCCC(C6=CC(=CN6)C(C)CNC)C5)C7C(CCC(CO)C37N)C4)C8CC(C2)CC9(CCCC9)C8	COCONUT=CNP0420854	0	0	0	0	0	0	0	0	0	0	0	0	0	0	0.000442291	0	0.000327581	0.000313077	0.000373442	0.000792036	0.000579868	0	0
378	pos_12149	Simple ID	Other possible annotated peaks for this cluster.	3	pos	12149	34.241	708.511	[M+H]+	generic	C46H65N3O3	18'-amino-19'-(hydroxymethyl)-24'-methyl-24'-(3-{4-[1-(methylamino)propan-2-yl]-1H-pyrrol-2-yl}cyclohexyl)-25'-oxaspiro[cyclopentane-1,4'-hexacyclo[20.3.1.1?,?.0?,??.0?,??.0??,??]heptacosane]-8',10',12'-trien-15'-yn-11'-ol	6.0856	6.0856	Unknown	3	20	708.511	[M+H]+	707.503	-0.0014306	3.258	1-hydroxy-2-unsubstituted benzenoids	HDDNNWCXBCBTMU-UHFFFAOYSA-N	OC1=CC=C2C(=C1)CC#CC3C4(OC(C)(C5CCCC(C6=CC(=CN6)C(C)CNC)C5)C7C(CCC(CO)C37N)C4)C8CC(C2)CC9(CCCC9)C8	COCONUT=CNP0420854	0	0	0	0	0	0	0	0	0	0	0	0	0	0	0	0.000470052	0	0	0	0	0	0.000621081	0.000225518
379	pos_12150	Unknown compound		1	pos	12150	33.776	708.519	[M+H]+																		0	0	0.000173313	0.000230405	0.000150975	0.000223599	0	0	0	0	0	0	0.000215185	0	0	0	0	0	0	0	0	0	0
380	pos_12181	Unknown compound		1	pos	12181	10.005	710.345	[M+2H]2+																		0	0	0	0.00067594	0.000520389	0.000458815	0	0	0	0	0	0	6.45598e-05	7.4766e-05	7.05599e-05	6.87367e-05	0	0	0	0	0	0	0
381	pos_11937	Simple ID	Other possible annotated peaks for this cluster.	6	pos	11937	13.173	697.103	[M+H]+	generic	C30H28N6O6S4	Chaetocin	3.8442	3.8442	Unknown	3	18	697.103	[M+H]+	696.095	-6.9e-06	2.026	Pyrroloindoles	PZPPOCZWRGNKIR-KFPPSCGWNA-N	O=C1N(C)C2(SSC13N(C2=O)C4NC=5C=CC=CC5C4(C3)C67C=8C=CC=CC8NC7N9C(=O)C%10(SSC9(C(=O)N%10C)C6)CO)CO	KNApSAcK=C00025536,ChEBI=CHEBI:94977,UNPD=UNPD124619;UNPD13052,BLEXP=BLEXPDB00000161591,NPA=NPA020287,COCONUT=CNP0174137	0	0	0	0.00655773	0.00520543	0.00682377	0	0	0	0	0	0	0.000696748	0.000754171	0.00074339	0.000800915	0	0	0	0	0	0	0
382	pos_12257	Simple ID		2	pos	12257	12.828	714.509	[M+H]+	generic	C39H72NO8P	PE-NMe2(18:3(6Z,9Z,12Z)/14:0)	4.1699	4.1699	Unknown	3	24	714.509	[M+H]+	713.5	-0.0023687	2.705	Dimethylphosphatidylethanolamines	AWAHACGXBQYOLA-SHUGJHRESA-N	O=C(OCC(OC(=O)CCCCCCCCCCCCC)COP(=O)(O)OCCN(C)C)CCCCC=CCC=CCC=CCCCCC	HMDB=HMDB0114094	0	0	0	0.00152054	0.000403882	0.000580005	0	0	0	0	0	0	0.000151155	0.000132287	0.000126258	0.000133431	0	0	0	0	0	0	0
383	pos_12268	Simple ID		1	pos	12268	10.6	715.325	[M+H]+	generic	C40H46N2O10	3-(14,16-dihydroxy-3-methyl-1,7-dioxo-3,4,5,6,7,8,9,10-octahydro-1H-2-benzoxacyclotetradecin-15-yl)-N-(2-oxo-2,3,4,5-tetrahydro-1H-1-benzazepin-3-yl)-3-(3,4,5-trimethoxyphenyl)propanamide	6.0095	6.0095	Unknown	3	41	715.325	[M+H]+	714.315	-0.0020779	3.495	Zearalenones	VIQBQBPSYGKTCT-UHFFFAOYSA-N	O=C1OC(C)CCCC(=O)CCCC=CC=2C=C(O)C(=C(O)C12)C(C3=CC(OC)=C(OC)C(OC)=C3)CC(=O)NC4C(=O)NC=5C=CC=CC5CC4	COCONUT=CNP0134151	0.00033296	0.000290583	0.000363007	8.70669e-05	0.000105136	7.602e-05	0	0	0	0	0	0	6.33967e-05	6.30257e-05	7.4588e-05	7.91563e-05	0	4.04964e-05	0	0	0	0	0
384	pos_1229	Simple ID		1	pos	1229	11.457	199.086	[M+H]+	generic	C12H10N2O	3-(2-Methyl-5-oxazolyl)-indole;APHE 3;Pimprinine	5.3628	5.3628	Unknown	3	37	199.086	[M+H]+	198.079	0.0006894	3.295	Indoles	WZJPGCHCOHYLMB-UHFFFAOYSA-N	N=1C=C(OC1C)C2=CNC=3C=CC=CC32	KNApSAcK=C00016243,UNPD=UNPD50087,NPA=NPA006067,COCONUT=CNP0103167	0.000556045	0.000577971	0.000622309	0.000167679	0.000183254	0.000182398	0.00056488	0.000482903	0.000496993	0.000644697	0.000663392	0.000636953	0.000338148	0.000368095	0.000376819	0.000364102	0.000392267	0.000242029	0.000333105	0.000590362	0.000694566	0.000623167	0
385	pos_1233	Unknown compound		1	pos	1233	21.807	199.095	[M+H]+																		0.000233536	0.000221188	0.000252916	0	0	0	0.000192298	0.000145058	0.000150914	0	0	0	5.67945e-05	6.00899e-05	0	5.96047e-05	0	0	0	0	0	0	0
386	pos_1239	Simple ID		1	pos	1239	3.371	199.108	[M+H]+	generic	C9H14N2O3	Pedatisectine D	7.4679	7.4679	Unknown	3	48	199.108	[M+H]+	198.1	0.0001188	4.199	Pyrazines	KIUSNPVZHFRLAJ-UHFFFAOYNA-N	OCC(O)C(O)CC1=NC=CN=C1C	KNApSAcK=C00028811,UNPD=UNPD24030,COCONUT=CNP0115556	0.000205454	0.000196173	0.000218765	0.000259219	0.000240282	0.000269055	0.00103775	0.000843246	0.000849151	0	0	0.000386346	0.000316788	0.000383321	0.000392464	0	0.00035354	0.000304691	0.000319648	0	0	0	0
387	pos_1240	Simple ID		1	pos	1240	3.739	199.108	[M+H]+	generic	C9H14N2O3	Pedatisectine D	7.5745	7.5745	Unknown	3	46	199.108	[M+H]+	198.1	0.0001188	4.311	Pyrazines	KIUSNPVZHFRLAJ-UHFFFAOYNA-N	OCC(O)C(O)CC1=NC=CN=C1C	KNApSAcK=C00028811,UNPD=UNPD24030,COCONUT=CNP0115556	0	0	0	0	0	0	0	0	0	0	0	0	0	0	0	0.000339562	0	0	0	0.000533329	0	0	6.24119e-05
388	pos_12500	Simple ID	Other possible annotated peaks for this cluster.	2	pos	12500	9.424	729.313	[M+Na]+	generic	C37H46N4O10	UNPD190734	6.4382	6.4382	Unknown	3	77	729.313	[M+Na]+	706.321	-0.0025856	3.528	Dipeptides	RQLWSJMGPWEQKG-LNOTXYRPNA-N	O=C1OC(OC)(C=2C=CC=CC2N1)CC3C(=O)NC(C4=CC=C(O)C=C4)CC(=O)OC(C)CC(C(=O)C(=C)CC(C(=O)NC(C(=O)N3C)C)C)C	UNPD=UNPD190734,COCONUT=CNP0141085	0	0	0	5.07206e-05	5.07488e-05	0	0	0	0	0.00018433	0.000387709	0.000315436	5.46441e-05	7.02172e-05	7.28642e-05	7.02448e-05	0	0	0	0	0	9.66955e-05	0
389	pos_12522	Unknown compound		1	pos	12522	28.953	730.567	[M+H]+																		0	0	0	0.000110316	0.000306661	0.000199759	0.000704749	0.00131881	0.000632946	0	0	0	0.000255444	0.000180447	0.000228525	0.00024258	0.000147916	0.000168674	0	0	0	0.000178817	0.00011345
390	pos_12560	Simple ID		1	pos	12560	26.443	732.551	[M+H]+	generic	C40H78NO8P	PC(16:1(9Z)/16:0)	5.8748	5.8748	Unknown	3	53	732.551	[M+H]+	731.547	0.0025815	3.68	Phosphatidylcholines	IPMVHVDAYPUFKH-WYRBGLKBSA-N	O=C(OCC(OC(=O)CCCCCCCCCCCCCCC)COP(=O)([O-])OCC[N+](C)(C)C)CCCCCCCC=CCCCCCC	HMDB=HMDB0008001,ChEBI=CHEBI:89731,YMDB=YMDB01864,FooDB=FDB025192,BMDB=BMDB08001,LipidMAPS=LMGP01011479,Urine=HMDB0008001,Serum=HMDB0008001,COCONUT=CNP0234903	0	0	0	0	0.000114978	0.000115088	0	0	0.0016842	0	0	0	0.000157966	0.00109087	0.000479263	0.000352365	0.000479975	0.000322983	0	0	0	0	9.60215e-05
391	pos_12602	Unknown compound		1	pos	12602	8.934	734.3	[M+H]+																		0.000167736	0.000145557	0.000144103	0.000242468	0.00019437	0.000231099	0	0	0	0	0	0	0	9.05192e-05	9.42772e-05	0.000100621	0	0.000101126	9.94479e-05	0.00018387	0.000152535	0.000172076	0
392	pos_1269	Simple ID		1	pos	1269	7.271	201.123	[M+H]+	generic	C9H16N2O3	UNPD126947	6.6827	6.6827	Unknown	3	44	201.123	[M+H]+	200.116	0.0004688	3.822	Alpha amino acids and derivatives	ANLAGVXTPHOKLD-WZTWBHKBNA-N	O=C1NC(C(=O)NC1CO)CC(C)C	UNPD=UNPD126947;UNPD96102,COCONUT=CNP0177184	0.000319893	0.000299424	0.000352941	0	0.000139678	0	0	0	0	0.000321344	0.000348717	0.000387647	0.000196035	0.000238822	0	0	0.000219522	0.000170454	0.000210849	0	0	0	0
393	pos_12787	Simple ID		1	pos	12787	29.844	744.602	[M+H]+	generic	C42H81NO9	UNPD131425	5.2371	5.2371	Unknown	3	60	744.602	[M+H]+	743.591	-0.0032904	3.114	Glycosphingolipids	JJEFDTBMGAMRDC-HFKFUOENNA-N	O=C(NC(COC1OC(CO)C(O)C(O)C1O)C(O)C=CCCCCCCCCCCCC(C)C)C(O)CCCCCCCCCCCCC(C)C	UNPD=UNPD131425,COCONUT=CNP0250184	0	0	0	9.69303e-05	0.000126246	9.99582e-05	0.000308339	0.000369177	0.000275548	0	0	0	0.000126887	0	0.000141528	8.42153e-05	0	9.81605e-05	0	0	0	0	4.6379e-05
394	pos_12706	Simple ID		4	pos	12706	14.448	740.465	[M+H]+	generic	C45H61N3O6	1-amino-5-(3-{2-[8-(ethylamino)-11-methyl-7-methylidene-1-oxacyclopentadeca-3,5,10-trien-13-yn-3-yl]-1,10-dihydroxy-6-(3-hydroxypropyl)-10-methylspiro[4.5]decan-7-ylidene}-2-oxobutyl)-1,2,3,4-tetrahydroisoquinolin-3-one	6.084	6.084	Unknown	3	51	740.465	[M+H]+	739.456	-0.0016869	3.437	Isoquinolones and derivatives	HKIPKAQXOZTAKR-UHFFFAOYSA-N	O=C1NC(N)C=2C=CC=C(C2C1)CC(=O)C(=C3CCC(O)(C)C4(CCC(C5=CC=CC(=C)C(NCC)CC=C(C)CC#CCOC5)C4O)C3CCCO)C	COCONUT=CNP0092282	0.000142819	0.000131501	0.000169294	7.81465e-05	7.08913e-05	6.98432e-05	0	0	0	0	0.000167687	0	0.000282127	0.000260091	0.000234361	0.000247439	9.69125e-05	0.00202556	0.000107373	0	0	0	0
395	pos_12806	Unknown compound		2	pos	12806	13.978	745.733	[M+H]+																		0.00285835	0.00344384	0.00275444	0	0	0	0	0	0	0	0	0	0	0.000217704	0	0.000172026	0	0	0	0	0	0	0
396	pos_12840	Unknown compound		1	pos	12840	11.539	747.295	[M+H]+																		9.25661e-05	8.46639e-05	8.43212e-05	0.000164486	0.000167765	0.000179529	0	0	0	7.01651e-05	0.00013267	7.56381e-05	6.32771e-05	8.66179e-05	9.67407e-05	9.53667e-05	0.00015602	7.70127e-05	0.00013699	0.000180739	0.000211751	0.000300161	0
397	pos_1287	Simple ID		1	pos	1287	14.772	202.143	[M+H]+	generic	C10H19NO3	N-(5-Methyl-3-oxohexyl)alanine	5.0575	5.0575	Unknown	3	26	202.143	[M+H]+	201.136	0.0008699	2.927	Alanine and derivatives	VHHUMCJOXTZJOX-UHFFFAOYNA-N	O=C(O)C(NCCC(=O)CC(C)C)C	HMDB=HMDB0041540,FooDB=FDB021520,UNPD=UNPD120821,COCONUT=CNP0182368	0.000548617	0.000562938	0.000541491	5.09113e-05	4.24133e-05	0	0	0	0	0.000530681	0.000466051	0.00107512	0.000214702	0.000204792	0.000207847	0.000219839	0.000217766	0.000296567	0.00020849	0.000608524	0.000417572	0.000813518	0
398	pos_13080	Unknown compound		1	pos	13080	14.537	757.409	[M+H]+																		0	0	0	0	0	0	0	0	0	0	0	0	0.000140181	0.000169275	0.0001309	0.000110916	0	0	0	0	0	0	0.000434804
399	pos_13111	Simple ID		1	pos	13111	15.076	758.407	[M+H]+	generic	C48H55NO7	9-ethyl-11-hydroxy-17-{[3-hydroxy-6-(4-{3-[(2-hydroxypropyl)amino]phenyl}butyl)cyclohexa-2,4-dien-1-yl]methyl}-25-methoxy-2,16-dioxatetracyclo[20.3.1.1?,?.0?,??]heptacosa-1(26),4(27),5,7(12),8,10,22,24-octaen-14-yn-19-one	5.4078	5.4078	Unknown	3	47	758.407	[M+H]+	757.398	-0.0014704	3.188	Naphthols and derivatives	XUBRKWWHPDOLLP-UHFFFAOYSA-N	O=C1CCC2=CC=C(OC)C(OCC3=CC=C4C(=C3)C(=CC(O)=C4CC#COC(C1)CC5C=C(O)C=CC5CCCCC=6C=CC=C(C6)NCC(O)C)CC)=C2	COCONUT=CNP0098813	0	0	0	0	0	0	0	0	0	0	0	0	0.00118334	0.00103414	0.00098817	0.00110408	0	0	0	0	0	0	0
400	pos_12256	Simple ID	Other possible annotated peaks for this cluster.	7	pos	12256	21.367	714.476	[M+H]+	generic	C38H67NO11	UNPD110083	5.3682	5.3682	Unknown	3	84	714.476	[M+H]+	713.471	0.0029884	3.047	Aminoglycosides	QZQXOYFOFWGSFM-ZBAQPFFSNA-N	O=C1OC(C(C)C(O)C(C(=O)C(C)CC(C)C(OC2OC(C)CC(N(C)C)C2O)C(C)C(OC3OC(C)C(O)C(OC)(C)C3)C1C)C)C4CC4	UNPD=UNPD110083,NPA=NPA016665,COCONUT=CNP0239893	0	0	0	0	0	0	0	0	0	0	0	0	5.38084e-05	0	0	0	0	0	0	0	0	0	0
401	pos_13169	Unknown compound		1	pos	13169	27.927	760.573	[M+H]+																		0.0001282	0.000119993	0.000159558	0.00018907	0.000376214	0.000357403	0.000949751	0.0020697	0.00156539	0.000182549	0.000208025	0.000214249	0.000463997	0.000537652	0.000702539	0.000414162	0.000491846	0.000472171	0.000244803	0.000379681	0.000362587	0.000287341	0.000139908
402	pos_1322	Double ID		2	pos	1322	11.716	204.124	[M+H]+	generic	C10H13N5	N6-(delta2-Isopentenyl)adenine;2iP	9.0562	9.0562	Unknown	3	20	204.124	[M+H]+	203.117	0.0003719	4.897	6-alkylaminopurines	HYVABZIGRDEKCD-UHFFFAOYSA-N	N1=CN=C(NCC=C(C)C)C=2NC=NC12	KNApSAcK=C00000094,ChEBI=CHEBI:17660,DrugBank=DB08768,FooDB=FDB002241;FDB031051,PubChem=92180,PlantCyc=CPD-4209,UNPD=UNPD134904,BLEXP=BLEXPDB00000092180,NPA=NPA005083,COCONUT=CNP0256675	0.00218234	0.00222009	0.00219627	0.000188485	0.000188913	0.000203156	0.00206177	0.0018767	0.00196246	0.00015208	0.00015295	0.000147518	0.000975179	0.000942652	0.000940722	0.000948478	0.000428269	0.000267246	0.000398658	0.00226645	0.00258851	0.00181838	0
403	pos_13220	Unknown compound		1	pos	13220	34.264	763.514	[M+H]+																		0	0	0	0	0	0	0	0	0	0	0	0	0	0	0	0.000171315	0	0	0	0	0	0	7.06691e-05
404	pos_13244	Unknown compound		1	pos	13244	16.141	764.397	[M+2H]2+																		0	0	0	0	0	0	0	0	0	0	0	0	8.24698e-05	8.41978e-05	8.76887e-05	0.000102434	0	0	0	0.00128293	0.00131832	0.00126247	0
405	pos_13273	Unknown compound		1	pos	13273	12.017	765.358	[M+2H]2+																		0	0	0	0.000809316	0.000770752	0.000547319	0	0	0	0	0	0	0.000114427	0.000112618	0.000124252	0.000121111	0	0	0	0	0	0	0
406	pos_13371	Unknown compound		1	pos	13371	11.111	770.352	[M+2H]2+																		0	0	0	0.00021349	0.000209322	0.000202495	0	0	0	0.000163092	0.000400577	0.000388871	7.85259e-05	0	0	7.5556e-05	0	0	0	0	0	0.000138057	0
407	pos_13384	Unknown compound		1	pos	13384	12.461	770.719	[M+3H]3+																		0	0	0	0	0	0	0	0	0	0	0	0	0.000103031	0.000118361	0.000132148	0.00015749	0	0	0	0	0	0	0
408	pos_12884	Simple ID		2	pos	12884	11.909	750.414	[M+H]+	generic	C45H55N3O7	4-{4-[(diaminomethylidene)amino]-14',22'-dihydroxy-6,7',11',19'-tetramethyl-8',17'-dioxo-13'-(2-phenylethenyl)spiro[cyclohexane-1,20'-pentacyclo[13.7.0.0?,??.0?,??.0??,??]docosane]-2,15'-dien-4'-yn-5-yl}-4-hydroxy-2-methylbut-2-enoic acid	5.3893	5.3893	Unknown	3	149	750.414	[M+H]+	749.404	-0.0029224	3.209	Triterpenoids	AJSMBHXSEJFFDO-UHFFFAOYSA-N	O=C(O)C(=CC(O)C1C(N=C(N)N)C=CC2(CC(O)C34C5=C(C(=O)CC23C)C6(C)CCC(=O)C(C)(CC#CCC4)C6C(C=CC=7C=CC=CC7)C5O)C1C)C	COCONUT=CNP0094895	0	0	0	0	0	0	0	0	0	0	0	0	0.000208898	0.00022635	0.000199515	0.00019126	0	0	0	0	0	0	0.00131077
409	pos_13414	Simple ID		1	pos	13414	12.753	772.425	[M+H]+	generic	C38H57N7O10	4-[2-(3-Benzyloxycarbonylamino-4-Cyclohexyl-1-Hydroxy-2-Oxo-Butylamino)-5-Guanidino-Pentanoylamino]-4-(1-Carboxy-2-Cyclohexyl-Ethylcarbamoyl)-Butyric Acid	5.8345	5.8345	Unknown	3	122	772.425	[M+H]+	771.417	-0.0006325	3.101	Oligopeptides	LKCWMWZIRUHWBW-GOGZTAQTSA-N	O=C(OCC=1C=CC=CC1)NC(C(=O)C(=O)NC(C(=O)NC(C(=O)NC(C(=O)O)CC2CCCCC2)CCC(=O)O)CCCNC(=N)N)CC3CCCCC3	DrugBank=DB01984	0	0	0	0	0	0	0	0	0	0	0	0	0.000435385	0.000439158	0.000383709	0.000405132	0	0	0	0	0	0	0
410	pos_13530	Simple ID		1	pos	13530	19.994	777.368	[M+H]+	generic	C40H56O15	UNPD60087	4.7425	4.7425	Unknown	3	41	777.368	[M+H]+	776.362	0.0010975	2.894	Triterpenoids	CNBPSPDNZJNBAZ-WQZGSZSWNA-N	O=C(OCC12C3=CCC4C(C(=O)OC5OC(CO)C(O)C(O)C5O)(C)C(OC(=O)C)CCC4(C)C3CC(O)C2(C)C6C(OC(=O)C6CC(=O)C=C(C)C)C1)C	UNPD=UNPD60087,COCONUT=CNP0175799	9.0568e-05	6.67021e-05	6.01832e-05	0	0	4.99543e-05	0.000199149	0.000205929	0.000178235	6.31876e-05	0.000246629	0.000208808	7.28742e-05	7.56137e-05	6.82323e-05	9.32242e-05	9.30025e-05	8.87331e-05	0.00013836	0.000119424	0.000351791	0.000107141	0
411	pos_13553	Unknown compound		1	pos	13553	38.423	778.582	[M+H]+																		0	0.000764746	0	0.000926258	0	0	0	0	0	0	0	0	0.00112486	0	0.000137953	8.85773e-05	0.000260937	0.000126281	8.39499e-05	0.00014028	0.000101055	0	3.93615e-05
412	pos_13584	Unknown compound		1	pos	13584	11.828	780.424	[M+H]+																		0	0	0	0	0	0	0	0	0	0	0	0	0.000169722	0.000154965	0.000174305	0.000191217	0	0	0	0	0	0	0
413	pos_13624	Unknown compound		1	pos	13624	11.137	781.351	[M+2H]2+																		0	0	0	0	0	0.00352711	0	0	0	0	6.47709e-05	0	0.000415564	0.000443085	0.000347989	0.00036153	0	0	0	0	0	0	0
414	pos_13625	Unknown compound		1	pos	13625	11.055	781.369	[M+2H]2+																		0	0	0	0.00380471	0.00343547	0	0	0	0	0	0	0	0.000342206	0.000442024	0.000494512	0.000491446	0	0	0	0	0	0	9.00237e-05
415	pos_1364	Simple ID		1	pos	1364	16.495	207.138	[M+H]+	generic	C13H18O2	UNPD163700	7.4149	7.4149	Unknown	3	56	207.138	[M+H]+	206.131	0.0003563	4.073	Carboxylic acids	UASMTJSLCCDICT-KYUFAPHWNA-N	O=C(O)C1=CC2CC2CCC(=CCC1)C	UNPD=UNPD163700,COCONUT=CNP0187763	0.000209297	0.000196328	0.000242774	0	0	0	0.000205588	0.000175328	0.000178504	0	0	0	6.03981e-05	0	6.39465e-05	6.52642e-05	0	0	0	0	0	0	0
416	pos_1367	Unknown compound		1	pos	1367	11.625	207.184	[M+H]+																		0	0	0	0.000174611	0.000199714	0.000185266	0	0	0	0	0.000332463	0	0.000204102	0.000206929	0.000227132	0	0	0	0	0	0.000451918	0	8.64461e-05
417	pos_1370	Simple ID		1	pos	1370	11.726	207.186	[M+H]+	generic	C13H22N2	1,3-dicyclohexylcarbodiimide	5.4785	5.4785	Unknown	3	46	207.186	[M+H]+	206.178	-2.48e-05	3.223	Carbodiimides	QOSSAOTZNIDXMA-UHFFFAOYSA-N	C(=NC1CCCCC1)=NC2CCCCC2	ChEBI=CHEBI:53090,STOFF=STOFF_7396,ECMDB=ECMDB20263,BLEXP=BLEXPDB00000010868,COCONUT=CNP0053198	0	0	0	0	0	0.000185266	0.000360708	0.000324465	0.000357572	0	0	0	0	0.000206929	0.000227132	0.000222488	0	0	0	0.000422651	0.000451918	0.000374121	0
418	neg_293	Double ID		2	neg	293	12.225	206.082	[M-H]-	generic	C11H13NO3	N-Acetyl-L-phenylalanine	8.7149	8.7149	Unknown	3	25	206.082	[M-H]-	207.09	0.0004668	5.054	Phenylalanine and derivatives	CBQJSKKFNMDLON-UEQNJFAPNA-N	O=C(O)C(NC(=O)C)CC=1C=CC=CC1	HMDB=HMDB0000512,ChEBI=CHEBI:16259;CHEBI:28203;CHEBI:21626;CHEBI:57702,YMDB=YMDB00860,FooDB=FDB022084,BMDB=BMDB00512,Saliva=HMDB0000512,Feces=HMDB0000512,PubChem=101184;74839,UNPD=UNPD32098;UNPD52038,BLEXP=BLEXPDB00000002000,COCONUT=CNP0317748	0.00202355	0.00266767	0.00249228	0.00025782	0	0	0.00297038	0	0	0.00105466	0.00054299	0.00320739	0.00152979	0.00119851	0.00122544	0.00119817	0	0	0	0.00229903	0.00235402	0.00146546	0
419	pos_13738	Simple ID		1	pos	13738	12.925	786.409	[M+H]+	generic	C40H59N5O9S	UNPD145820	6.3484	6.3484	Unknown	3	116	786.409	[M+H]+	785.403	0.0014259	3.684	Dipeptides	CYTBBNFQKZOQJE-DIYXRFKONA-N	O=C(OCN(C(=O)C(NC(=O)C1N(C)CCCC1)C(C)CC)C(CC(OC(=O)C)C2=NC(=CS2)C(=O)NC(CC=3C=CC=CC3)CC(C(=O)O)C)C(C)C)C	UNPD=UNPD145820,NPA=NPA001723,COCONUT=CNP0333063	0	0	0	0	0	0	0	0	0	0	0	0	0.000281655	0.000333395	0.000325062	0.000317946	0	0	0	0	0	0	0
420	pos_13702	Simple ID	Other possible annotated peaks for this cluster.	5	pos	13702	14.727	784.488	[M+H]+	generic	C47H65N3O7	1-amino-5-[3-(1,10-dihydroxy-2-{8-[(4-hydroxybutyl)amino]-11-methyl-7-methylidene-1-oxacyclopentadeca-3,5,10-trien-13-yn-3-yl}-6-(3-hydroxypropyl)-10-methylspiro[4.5]decan-7-ylidene)-2-oxobutyl]-1,2,3,4-tetrahydroisoquinolin-3-one	6.0743	6.0743	Unknown	3	39	784.488	[M+H]+	783.482	0.0015279	3.502	Isoquinolones and derivatives	XVZUVRSCSFFCJI-UHFFFAOYSA-N	O=C1NC(N)C=2C=CC=C(C2C1)CC(=O)C(=C3CCC(O)(C)C4(CCC(C5=CC=CC(=C)C(NCCCCO)CC=C(C)CC#CCOC5)C4O)C3CCCO)C	COCONUT=CNP0265534	0.000100037	8.41661e-05	8.6152e-05	4.43824e-05	4.27318e-05	3.94004e-05	8.55854e-05	0	0	0.000115931	9.27279e-05	8.65169e-05	0.000140452	0.000142369	0.000117009	0.00013395	5.71762e-05	0.00105364	6.23511e-05	8.85509e-05	0.000100117	9.84604e-05	0
421	pos_13792	Simple ID		1	pos	13792	13.448	790.404	[M+H]+	generic	C47H55N3O8	4-{4-[(diaminomethylidene)amino]-16',19'-dihydroxy-6,9',13',22'-tetramethyl-10',24'-dioxo-15'-(2-phenylethenyl)spiro[cyclohexane-1,21'-hexacyclo[11.11.0.0?,??.0?,??.0?,??.0?,??]tetracosane]-1',2,17'-trien-6'-yn-5-yl}-3,4-dihydroxy-2-methylbut-2-enoic acid	5.0345	5.0345	Unknown	3	136	790.404	[M+H]+	789.399	0.0018922	2.873	Triterpenoids	YTADJYIGVHOKLQ-UHFFFAOYSA-N	O=C(O)C(=C(O)C(O)C1C(N=C(N)N)C=CC2(CC3(O)C=CC4(O)C5=C6C(=O)CC2(C)C53CCC#CCC7(C(=O)CCC6(C)C7C4C=CC=8C=CC=CC8)C)C1C)C	COCONUT=CNP0097282	0.000171885	0.000182257	0.000194672	9.68468e-05	0.000100194	9.21532e-05	0.000378394	0.000311104	0.000321389	0.000217782	0.000210047	0.000189398	0.000157132	0.000168945	0.000162129	0.000168745	0.000111923	0.000109846	0.000109524	0.000205807	0.000146053	0.000157391	0
422	pos_13796	Simple ID		1	pos	13796	38.421	790.57	[M+H]+	generic	C48H75N3O6	CNP0439029	4.4933	4.4933	Unknown	3	44	790.57	[M+H]+	789.566	0.0031636	2.731	Medium-chain hydroxy acids and derivatives	NARIBRZBUAZNNP-UHFFFAOYSA-N	O=C(O)C(CCCCCC1C=CC(CCCCC)CC1O)C(O)CCC2(O)CC(CC=3C=CN=C(N)C3)CC2CC4=CC(=CN4)C(C)CC(C)C5CCC(=O)CC5	COCONUT=CNP0439029	0.000614352	0.000396996	0.00052006	0.000664792	0.000431886	0.000327616	0	0.000270383	0.000293219	0	0.000553696	0.00094434	0.000606378	0.0002178	0.000316948	0.000140321	0.000226816	0.00015109	0	0	0.00027221	0.000185161	0
423	pos_11800	Unknown compound		2	pos	11800	15.812	688.771	[M+2H]2+																		0	0	0	0	0	0	0.000959916	0.000691482	0.000414643	0	0	0	8.04233e-05	8.1088e-05	9.25388e-05	7.30925e-05	0	0	0	0	0	0	0
424	pos_13849	Unknown compound		1	pos	13849	9.604	794.369	[M+H]+																		0	0	0	5.16413e-05	3.65436e-05	0	0	0	0	0.000883548	0	0.00080253	6.82902e-05	9.11153e-05	8.74544e-05	9.93753e-05	0	0	0	0.000304029	0.000118699	0.00103075	0
425	pos_13956	Unknown compound		1	pos	13956	11.802	800.389	[M+3H]3+																		0	0	0	0	0	0	0	0	0	0	0	0	0.00039791	0.000517192	0.000537713	0.00061472	0	0	0	0	0	0	0.00146141
426	pos_14024	Unknown compound		1	pos	14024	27.768	804.6	[M+H]+																		0	0	0	0	0.000162679	0.000184595	0.000390218	0.00104921	0.000686068	9.4595e-05	7.975e-05	0	0.000202232	0.000200808	0.000205421	0.000163202	0.000148025	0.000193321	0	0	0.000122274	0	6.10962e-05
427	pos_14035	Simple ID		1	pos	14035	14.226	805.391	[M+H]+	generic	C44H56N2O12	2-hydroxy-11-methoxy-3,7,12,14,17,17,20,24,32-nonamethyl-6,25,29,31-tetraoxo-28-(pyrrolidin-1-yl)-8,16,18,33-tetraoxa-26-azapentacyclo[25.3.1.1?,?.1??,??.0?,??]tritriaconta-1,3,5(30),9,21,23,27-heptaen-13-yl acetate	5.3997	5.3997	Unknown	3	106	805.391	[M+H]+	804.383	-0.0004983	3.416	Macrolactams	LCMBEQGDYIBKDI-UHFFFAOYSA-N	O=C(OC1C(C)C(OC)C=COC2(OC3=C(C2=O)C=4C(=O)C(=C(NC(=O)C(=CC=CC(C)C5OC(OC(C1C)C5C)(C)C)C)C(=O)C4C(O)=C3C)N6CCCC6)C)C	COCONUT=CNP0368554	0	0	0	0	0	0	0	0	0	0	0	0	8.98286e-05	7.68056e-05	8.61739e-05	7.13086e-05	0	0	0	0	0	0	0
428	pos_1410	Simple ID		1	pos	1410	5.629	211.108	[M+H]+	generic	C10H14N2O3	UNPD80973	6.8618	6.8618	Unknown	3	53	211.107	[M+H]+	210.1	0.0002188	3.979	Pyrrolines	AZLHFHPCLQLBFN-ZRXQTJIPNA-N	O=C1C(=CC(O)N1C2NC(=O)C(C)C2)C	UNPD=UNPD80973,COCONUT=CNP0320109	0	0	0	0	0	0	0	0	0	0	0	0	0	0	0	0.00088803	0	0	0	0.00191868	0.0023797	0.00242291	0
429	pos_1412	Simple ID		1	pos	1412	5.352	211.108	[M+H]+	generic	C10H14N2O3	UNPD80973	6.9328	6.9328	Unknown	3	54	211.108	[M+H]+	210.1	0.0001188	4.032	Pyrrolines	AZLHFHPCLQLBFN-ZRXQTJIPNA-N	O=C1C(=CC(O)N1C2NC(=O)C(C)C2)C	UNPD=UNPD80973,COCONUT=CNP0320109	0	0.000540496	0.000598739	0.00132139	0.00121492	0.00136707	0.000878447	0.000728083	0.000739462	0	0	0	0.000666304	0.00073713	0.000768581	0	0.000472811	0.000399123	0.000451238	0	0	0	0
430	pos_1417	Unknown compound		1	pos	1417	1.343	211.118	[M+H]+																		0.000210141	0.00019251	0.000196507	0.000124855	0	0	0	0.000237265	0	0.000218255	0.000238702	0.000250363	0.00017603	0.00017356	0.000180493	0	0.000141487	0	0	0.000335933	0	0.000232626	0
431	pos_1420	Unknown compound		1	pos	1420	14.725	211.122	[M+H]+																		0.000725142	0.000792789	0.000858241	0.000300935	0.00033722	0.00035016	0	0.000490236	0.000530948	0.000680623	0.000698006	0.000622778	0.000436039	0.000449613	0	0.00043196	0.000602151	0	0.000521833	0	0.000655843	0.000582173	0
432	pos_14212	Unknown compound		1	pos	14212	11.649	812.374	[M+H]+																		0.000109865	0.000102816	0.000101046	0.000274894	0.00025037	0.000281851	0	0	0	0	0	0	6.24877e-05	7.21299e-05	0	0	0	0	0	0	0	0	0
433	pos_14321	Unknown compound		1	pos	14321	28.565	818.621	[M+H]+																		0	0	0	0	9.60351e-05	6.15758e-05	0.000194753	0.000459157	0.000254846	0	0	0	8.43062e-05	8.0681e-05	0.000105377	0.000100252	0	7.27825e-05	0	0	0	0	4.37991e-05
434	pos_14350	Simple ID		1	pos	14350	38.473	820.582	[M+H]+	generic	C47H82NO8P	PE(20:4(5Z,8Z,11Z,14Z)/22:2(13Z,16Z))	3.7023	3.7023	Unknown	3	13	820.582	[M+H]+	819.578	0.0033817	2.225	Phosphatidylethanolamines	AAISZNAPQHMCLT-UNCBVPCZSA-N	O=C(OCC(OC(=O)CCCCCCCCCCCC=CCC=CCCCCC)COP(=O)(O)OCCN)CCCC=CCC=CCC=CCC=CCCCCC	HMDB=HMDB0009404,FooDB=FDB026594,BMDB=BMDB09404,LipidMAPS=LMGP02010959,COCONUT=CNP0164073	0.000246192	0	0.000111624	0.00020788	0.000185114	0.000279312	0.000652083	0.000770748	0.00126713	0.000173835	0.000228525	0.000337093	0.000181649	0.000711364	9.75527e-05	0	0	0	0	0	0	0	3.26835e-05
435	pos_14375	Simple ID		1	pos	14375	32.731	822.599	[M+H]+	generic	C47H84NO8P	PE-NMe2(20:4(8Z,11Z,14Z,17Z)/20:1(11Z))	4.5394	4.5394	Unknown	3	29	822.599	[M+H]+	821.593	0.0013317	2.92	Dimethylphosphatidylethanolamines	BTXQSDILCNJVGZ-SKIFDHOVSA-N	O=C(OCC(OC(=O)CCCCCCCCCC=CCCCCCCCC)COP(=O)(O)OCCN(C)C)CCCCCCC=CCC=CCC=CCC=CCC	HMDB=HMDB0114365	0	0.000163754	0.000507388	0.000541777	0.00033867	0.000481173	0.00115084	0.000690806	0	0	0	0	0.000703447	0.000223201	0	0.00060194	0	0	0	0	0.00107065	0.000976963	0
436	pos_1438	Simple ID		1	pos	1438	1.993	212.103	[M+H]+	generic	C9H13N3O3	Zalcitabine	6.1788	6.1788	Unknown	3	30	212.103	[M+H]+	211.096	0.0001677	3.605	Pyrimidine 2',3'-dideoxyribonucleosides	WREGKURFCTUGRC-POYBYMJQSA-N	O=C1N=C(N)C=CN1C2OC(CO)CC2	HMDB=HMDB0015078,ChEBI=CHEBI:10101,DrugBank=DB00943,SMPDB=PW_C009386,T3DB=T3D4719,STOFF=STOFF_8311,Urine=HMDB0015078,Serum=HMDB0015078,PubChem=24066,BLEXP=BLEXPDB00000005718,COCONUT=CNP0183701	0	0	7.53548e-05	0	0	0	0.000207347	0.000152286	0.000159376	5.77191e-05	0	0	7.57665e-05	7.51564e-05	0	0	7.15904e-05	5.72824e-05	5.99015e-05	0	0	0	0
437	pos_14449	Simple ID		1	pos	14449	38.537	828.544	[M+H]+	generic	C44H73N7O6S	Apramide G	5.2224	5.2224	Unknown	3	36	828.544	[M+H]+	827.534	-0.0027195	2.595	Valine and derivatives	HAXFUPMEEWESKW-DAKPJNBZNA-N	O=C(N(C)C(C(=O)N(C)C(C(=O)N(C)C(C(=O)N(C)C(C(=O)N1CCCC1C2=NC=CS2)C(C)C)C(C)C)C(C)C)C(C)C)C(N(C(=O)C(C)CCCCC#C)C)C	KNApSAcK=C00027884,UNPD=UNPD185048,NPA=NPA008084,COCONUT=CNP0112510	0.000527883	0.000493111	0.000339941	0.000224176	0.000125021	9.7772e-05	0.000101612	0	0.000181377	0.000182888	0.000447021	0.000453117	0.000313698	0.000233039	0.000485037	0	0.000341613	0.000143126	0.000100542	9.17728e-05	0	0	0
438	pos_14455	Unknown compound		1	pos	14455	32.759	828.565	[M+Na]+																		0.000211166	0.00018997	0.000120275	0	0	0	0	0	0	0	0	0	0.000105134	0	0.000181701	0	0.00010608	0	0	0	0	0	0
439	pos_14534	Unknown compound		1	pos	14534	13.788	833.413	[M+2H]2+																		0	0	0	0	0	0	0	0	0	0	0	0	0.000126264	9.64179e-05	0.000108736	9.54276e-05	0	0	0	0	0	0	6.41571e-05
440	pos_14608	Simple ID		1	pos	14608	14.103	838.465	[M+H]+	generic	C54H63NO7	CNP0441078	4.5523	4.5523	Unknown	3	87	838.465	[M+H]+	837.46	0.0027298	2.62	Phenanthrenes and derivatives	PANABZGGZJUVEZ-UHFFFAOYSA-N	O=CCC(O)(O)C1C=CCC(CCCCCC(C=O)C2C=C(CCN)CC2)C(C3=CC=C(O)C=C3)CC=4C=CC=5C=CC6CC7C=C8C=CC=CC8=CC7CC6(C5C4)C1C(=O)O	COCONUT=CNP0441078	0	0	0	0	0	0	0	0	0	0	0	0	0.000156381	0.000143002	0.000129678	0.000139868	0	0	0	0	0	0	0
441	pos_1466	Simple ID		1	pos	1466	12.448	213.102	[M+H]+	generic	C13H12N2O	Harmine	5.3071	5.3071	Unknown	3	56	213.102	[M+H]+	212.095	3.95e-05	3.025	Harmala alkaloids	BXNJHAXVSOCGBA-UHFFFAOYSA-N	N=1C=CC=2C=3C=CC(OC)=CC3NC2C1C	HMDB=HMDB0030311,KNApSAcK=C00001737,ChEBI=CHEBI:28121,DrugBank=DB07919,FooDB=FDB002149,NANPDB=NANPDB_4781,PubChem=5280953,PlantCyc=CPD-9940,UNPD=UNPD181043,BLEXP=BLEXPDB00005280953,COCONUT=CNP0287011	0.000107322	0.000113625	0.000107263	0	0	0	0.000157565	0.000125261	0.000131787	0.000113793	0.000110612	0.000112321	0	0	6.4275e-05	0	0	0	0	0	0	0	0
442	pos_571	Simple ID		5	pos	571	11.516	152.016	[M+H]+	generic	C7H5NOS	1,2-Benzisothiazol-3(2H)-one	4.4359	4.4359	Unknown	3	21	152.016	[M+H]+	151.009	0.0001612	2.845	Benzothiazoles	DMSMPAJRVJJAGA-UHFFFAOYSA-N	O=C1NSC=2C=CC=CC21	HMDB=HMDB0034413,ChEBI=CHEBI:167099,T3DB=T3D4861,FooDB=FDB012808,STOFF=STOFF_2331,BLEXP=BLEXPDB00000017520,COCONUT=CNP0071078	0.000225531	0.000230327	0.000251671	7.90771e-05	8.73248e-05	9.23011e-05	0.000245788	0.000204215	0.000229599	0.000278744	0.000298994	0.000275952	0.000106662	0.000128117	0.000139874	0.0001363	9.74208e-05	6.87698e-05	9.67778e-05	0.00013685	0.000152364	0.000147624	0
443	pos_15493	Simple ID		3	pos	15493	13.074	931.451	[M+H]+	generic	C53H62N4O11	2-[2-(15-{5-[(cyclohexylamino)methyl]-1H-indol-3-yl}-7-cyclopentyl-5,19,20,21-tetrahydroxy-21-(hydroxymethyl)-11-methoxy-2,16,22-trioxatetracyclo[16.3.1.0?,??.0?,?]docosa-3,5,7,9,11,13-hexaen-6-yl)-2-oxoethyl]-4-[(methylamino)methyl]-2,3-dihydro-1H-isoindol-1-one	5.1256	5.1256	Unknown	3	113	931.451	[M+H]+	930.442	-0.0026147	2.785	Naphthols and derivatives	ZRFGBWHXSVMBMA-UHFFFAOYSA-N	O=C1C2=CC=CC(=C2CN1CC(=O)C3=C(O)C4=C(C=C(OC)C=5C=CC(OCC6OC(OC54)C(O)(CO)C(O)C6O)C7=CNC=8C=CC(=CC87)CNC9CCCCC9)C=C3C%10CCCC%10)CNC	COCONUT=CNP0417444	0	0	0	0	0	0	0	0	0	0	0	0	0.00082987	0.000866435	0.000855227	0.000911299	0	0	0	0	0	0	0
444	pos_1472	Simple ID		1	pos	1472	7.394	213.123	[M+H]+	generic	C10H16N2O3	UNPD91255	6.3992	6.3992	Unknown	3	68	213.123	[M+H]+	212.116	0.0001688	3.708	Alpha amino acids and derivatives	WIAREGARJIKKRJ-ONRUVPORNA-N	O=C1NC(C(=O)N2CCCC12O)C(C)C	UNPD=UNPD91255,NPA=NPA017722;NPA019702,COCONUT=CNP0327756	0.000194629	0.0002015	0.000222095	0.000106323	0.00011258	0.000104251	0.000272914	0.000256122	0.000272554	0	0	0.000219907	0.000145778	0.000158744	0.000163612	0	0.000150134	0.00012116	0.00014423	0	0	0	0
445	pos_1473	Simple ID		1	pos	1473	7.499	213.123	[M+H]+	generic	C10H16N2O3	L-prolyl-L-proline	6.7274	6.7274	Unknown	3	54	213.123	[M+H]+	212.116	-3.12e-05	3.975	Dipeptides	RWCOTTLHDJWHRS-UHFFFAOYNA-N	O=C(O)C1N(C(=O)C2NCCC2)CCC1	HMDB=HMDB0011180,ChEBI=CHEBI:73646,FooDB=FDB027952,BMDB=BMDB11180,BLEXP=BLEXPDB00000263469,COCONUT=CNP0189934	0	0	0	0	0	0	0	0	0	0	0	0	0	0	0	0.000173854	0	0	0	0.000273068	0.000293103	0.000262274	3.52223e-05
446	pos_14752	Unknown compound		1	pos	14752	14.768	850.403	[M+H]+																		0	0	0	0	0	0	0	0	0	0	0	0	0.000159698	0.000146173	0.000118613	0.000143707	0	0	0	0	0	0	0
447	pos_1478	Simple ID		1	pos	1478	13.64	213.159	[M+H]+	generic	C11H20N2O2	brivaracetam	7.0902	7.0902	Unknown	3	25	213.159	[M+H]+	212.152	0.0004543	4.073	Alpha amino acids and derivatives	MSYKRHVOOPPJKU-BDAKNGLRSA-N	O=C(N)C(N1C(=O)CC(C1)CCC)CC	ChEBI=CHEBI:133013,BLEXP=BLEXPDB00009834332	0.00138773	0.00131901	0.00139465	0.00062331	0.000599807	0.000605798	0.00165917	0.00153313	0.00158476	0.00100543	0.00124723	0.00122882	0.000696831	0.000733888	0.000763363	0.000823203	0.000819477	0.000629056	0.000756976	0.00139872	0.00142855	0.00133744	0.000150246
448	pos_14781	Unknown compound		1	pos	14781	13.421	853.414	[M+2H]2+																		0	0	0	0	0	0	0	0	0	0	0	0	0.000316646	0.000385623	0.000264013	0.000345696	0	0	0	0	0	0	0.000581737
449	pos_14847	Unknown compound		1	pos	14847	13.522	860.409	[2M+H]+																		0	0	0	0	0	0	0	0	0	0	0	0	0.000218362	0.000191024	0.000221061	0.000176731	0	0	0	0	0	0	0
450	pos_14851	Simple ID		1	pos	14851	14.075	860.433	[M+H]+	generic	C48H65N3O7S2	1-amino-5-{3-[1,10-dihydroxy-6-(3-hydroxypropyl)-10-methyl-2-{8-methylidene-2-oxa-15,16-dithiabicyclo[10.5.3]icosa-4,6,11-trien-18-yn-4-yl}spiro[4.5]decan-7-ylidene]-2-oxobutyl}-4-[(2-hydroxypropyl)amino]-1,2,3,4-tetrahydroisoquinolin-3-one	5.62	5.62	Unknown	3	105	860.433	[M+H]+	859.426	0.0008699	2.944	Alpha amino acid amides	GLRCZMGDYAPOFX-UHFFFAOYSA-N	O=C(C(=C1CCC(O)(C)C2(CCC(C3=CC=CC(=C)CCC=C4CC#CC(OC3)CSSCC4)C2O)C1CCCO)C)CC5=CC=CC6=C5C(NCC(O)C)C(=O)NC6N	COCONUT=CNP0418309	0	0	0	0	0	0	0	0	0	0	0	0	6.81972e-05	6.84434e-05	6.08874e-05	7.19877e-05	0	0	0	0	0	0	0.000144659
451	pos_1501	Simple ID		1	pos	1501	10.467	215.081	[M+H]+	generic	C12H10N2O2	CNP0438018	4.9694	4.9694	Unknown	3	40	215.081	[M+H]+	214.074	0.000804	3.053	Hydroxyquinolines	MBAQINSVJXGLKZ-UHFFFAOYSA-N	N#CC=1C(=O)C=2C=CC=CC2N(C1O)CC	COCONUT=CNP0438018	0	0.000134574	0.000131804	0.000103819	8.38389e-05	9.8474e-05	0	0.000181052	0.000188474	0.000163654	0.000140144	0.000217942	0.000147709	0.000139036	0.000139018	0.000127063	0.000237568	0.000128442	0.000179342	0.000305612	0.000280116	0.000155038	0
452	pos_1502	Simple ID		1	pos	1502	17.708	215.081	[M+H]+	generic	C12H10N2O2	2-(furan-2-yl)-1,2,3,4-tetrahydroquinazolin-4-one	5.7584	5.7584	Unknown	3	27	215.081	[M+H]+	214.074	0.000804	3.488	Quinazolines	QCRTXSVKRLCOBJ-UHFFFAOYSA-N	O=C1NC(NC=2C=CC=CC12)C=3OC=CC3	COCONUT=CNP0141071	0.00011389	0.000126028	0.000123377	0	0	0	0.000181232	0.000183085	0.000177017	0	0	0	6.62423e-05	5.96745e-05	6.17428e-05	6.25791e-05	0	0	5.12493e-05	0	0	0	0
453	pos_1510	Simple ID		1	pos	1510	10.315	215.125	[M+H]+	generic	C7H14N6O2	({2-[(carbamoylamino)imino]pentan-3-ylidene}amino)urea	4.4558	4.4558	Unknown	3	40	215.125	[M+H]+	214.118	-9.99e-05	2.721	Semicarbazones	AUDMMHFKJGYBGN-UHFFFAOYSA-N	O=C(N)NN=C(C(=NNC(=O)N)CC)C	COCONUT=CNP0032423	0	0	0	0	0	0	0	0.000184835	0.000334703	0	0	0	8.78598e-05	8.35276e-05	0	9.64486e-05	0.00015463	0.000129556	0.00018916	0	0	0	0
454	pos_15190	Simple ID		1	pos	15190	12.505	889.421	[2M+H]+	generic	C24H32N2O4S	N-[4-hydroxy-1-(4-methoxybenzoyl)-4-methyl-2-(thiophen-2-yl)piperidin-3-yl]-3,3-dimethylbutanamide	3.7636	3.7636	Unknown	3	59	889.421	[2M+H]+	444.208	0.0012924	2.069	1-benzoylpiperidines	WYAGPHRQJNAVEB-UHFFFAOYSA-N	O=C(C1=CC=C(OC)C=C1)N2CCC(O)(C)C(NC(=O)CC(C)(C)C)C2C=3SC=CC3	COCONUT=CNP0155652	0	0	0	0.0002187	0.000174717	0.000164488	0	0	0	0	0	0	0.000128204	0.000105604	9.8223e-05	0.000118476	0	0	0	0	0	0	0
455	pos_1528	Unknown compound		1	pos	1528	16.761	216.158	[M+H]+																		0.000178749	0.000174748	0.000182703	7.63247e-05	7.35965e-05	6.81396e-05	9.81627e-05	0	0	0.000160781	0.000151042	0.00016072	8.92846e-05	9.76234e-05	8.51262e-05	9.0577e-05	0.000103793	8.09987e-05	0.000104718	0.000184168	0.000203202	0.000209256	0
456	pos_15336	Unknown compound		1	pos	15336	21.513	905.391	[M+H]+																		0.000120089	8.90859e-05	9.09986e-05	0	0	4.33616e-05	0.000234113	0.000112908	0	0.000104824	0.000271806	0.000189742	8.37482e-05	8.70218e-05	8.27255e-05	8.65654e-05	5.7675e-05	6.32314e-05	0.00011056	0.00017187	0.000247959	0.000105026	0
457	pos_1535	Unknown compound		1	pos	1535	0.926	216.206	[2M+H]+																		0	0	0	0.000828475	0.000846842	0.000856966	0	0	0	0	0	0	7.79804e-05	7.73335e-05	6.04133e-05	7.94955e-05	0	0	0	0	0	0	0
458	pos_15383	Unknown compound		1	pos	15383	10.653	911.383	[M+2H]2+																		0	0	0	0.000309306	0.000330462	0.000214787	0	0	0	0	0	0	6.29749e-05	6.43811e-05	0	6.27256e-05	0	0	0	0	0	0	0
459	pos_1541	Simple ID		1	pos	1541	9.605	217.096	[M+H]+	generic	C12H12N2O2	L-1,2,3,4-Tetrahydro-beta-carboline-3-carboxylic acid	7.2478	7.2478	Unknown	3	33	217.096	[M+H]+	216.09	0.0007541	3.898	Beta carbolines	FSNCEEGOMTYXKY-UHFFFAOYNA-N	O=C(O)C1NCC=2NC=3C=CC=CC3C2C1	HMDB=HMDB0035665,KNApSAcK=C00026660,ChEBI=CHEBI:91151,FooDB=FDB014381,UNPD=UNPD33054,BLEXP=BLEXPDB00000098285,COCONUT=CNP0110814	0.00161126	0.00154218	0.0016941	0.000930566	0.000923969	0.000869407	0.00237711	0.00215833	0.00244808	0	0.00174849	0.00135723	0.00117177	0.00130351	0.00132431	0.00134966	0.00099406	0.000889974	0.00100952	0.00200084	0.00189963	0.00166038	0.000423547
460	pos_15463	Unknown compound		1	pos	15463	11.532	925.427	[M+H]+																		0	0	0	0	0	0	0	0	0	0.000351537	0	0	8.83435e-05	0	8.63745e-05	9.01804e-05	0	0	0	0.00053003	0.000593911	0.00068585	0
461	pos_15464	Unknown compound		1	pos	15464	11.437	925.428	[M+H]+																		0	0	0	0	0	0	0	0	0	0.000431699	0.000326344	0.000306385	0.000117478	0.000104783	0	0	0	0	0	0	0	0	0
462	pos_15547	Unknown compound		1	pos	15547	12.47	938.459	[M+3H]3+																		0	0	0	0	0	0	0	0	0	0	0	0	9.00911e-05	8.24631e-05	8.48187e-05	0.000110883	0	0	0	0	0	0	0
463	pos_15595	Unknown compound		1	pos	15595	12.437	946.438	[M+2H]2+																		0	0	0	0.000284414	0.000274387	0.000248675	0	0	0	0	0	0	5.19592e-05	6.40954e-05	0	0	0	0	0	0	0	0	0
464	pos_15601	Simple ID		1	pos	15601	12.403	947.447	[M+H]+	generic	C58H62N2O10	CNP0448963	5.0123	5.0123	Unknown	3	104	947.447	[M+H]+	946.44	0.0006226	2.72	Chromenopyridines	XRTQQWGKSFIWFH-UHFFFAOYSA-N	O=C(O)C=1C=CC=CC1NC(C=2C=3OC(C)(C)C(O)C(=O)C3C=C(C2C=CC=CC)CC=C(C)C)C4C=5C(=CC=6C(=O)C(O)C(OC6C5C7OC(=O)C=8C=CC=CC8N7C4C=CC)(C)C)CC=C(C)C	COCONUT=CNP0448963	0	0	0	0	0	0.000221515	0	0	0	0	0	0	0.000590437	0.000634549	0.000594357	0.000621334	0	0	0	0	0	0.000249067	0
465	pos_15610	Unknown compound		1	pos	15610	14.377	948.471	[M+2H]2+																		0	0	0	0	0	0	0	0	0	0	0	0	0.000144484	0.000151527	0.000148663	0.000172523	0	0	0	0	0	0	0
466	pos_1563	Simple ID		1	pos	1563	10.03	218.138	[M+H]+	generic	C10H19NO4	Propionylcarnitine	8.3914	8.3914	Unknown	3	30	218.138	[M+H]+	217.131	0.0002845	5.117	Acyl carnitines	UFAHZIUFPNSHSL-UHFFFAOYNA-N	O=C([O-])CC(OC(=O)CC)C[N+](C)(C)C	HMDB=HMDB0000824;HMDB0062514,ChEBI=CHEBI:28867;CHEBI:53210;CHEBI:53211,SMPDB=PW_C000658,FooDB=FDB022268,BMDB=BMDB00824,LipidMAPS=LMFA07070005;LMFA07070099;LMFA07070105,Urine=HMDB0000824,Saliva=HMDB0000824,Feces=HMDB0000824,CSF=HMDB0000824,Serum=HMDB0000824,PubChem=107738,UNPD=UNPD152946,BLEXP=BLEXPDB00000107738,COCONUT=CNP0082874	0	0	0	5.42144e-05	0	7.41874e-05	0	0	0	0	0	0	0.000348421	0.000402579	0.000423016	0.000437	0.00367067	0.00321018	0.0025263	0	0	0	0
467	pos_15646	Unknown compound		1	pos	15646	12.096	954.445	[M+2H]2+																		0	0	0	0.000804679	0.000841498	0.000800938	0	0	0	0	0	0	0.000117685	0.000131128	0.00011962	0.000141931	0	0	0	0	0	0	0
468	pos_15659	Unknown compound		1	pos	15659	14.061	956.492	[M+2H]2+																		0	0	0	0	0	0	0	0	0	0	0	0	0.000893541	0.000888255	0.000836107	0.000890218	0	0	0	0	0	0	0
469	pos_2539	Simple ID		3	pos	2539	13.647	266.106	[M+H]+	generic	C10H19NO5S	N-{6-methoxy-hexahydrofuro[3,2-b]furan-3-yl}propane-1-sulfonamide	5.4508	5.4508	Unknown	3	34	266.106	[M+H]+	265.098	-0.0007298	3.355	Furofurans	XYYTVFRFTUIAMN-UHFFFAOYSA-N	O=S(=O)(NC1COC2C(OC)COC21)CCC	COCONUT=CNP0053919	0.00016448	0.000195994	0.000176553	0	0	0	0	8.95572e-05	8.28633e-05	0	0	0	8.72296e-05	6.78203e-05	7.29833e-05	7.32179e-05	0	0	0	0	0	0	5.84004e-05
470	pos_15720	Unknown compound		1	pos	15720	12.48	968.455	[M+2H]2+																		0	0	0	0.000752957	0.000607247	0.000632119	0	0	0	0	0	0	0.000102703	8.90062e-05	0.000113074	0	0	0	0	0	0	0	0
471	pos_15843	Unknown compound		1	pos	15843	11.712	991.517	[M+H]+																		0	0	0	0	0	0	0	0	0	0	0	0	0.000138812	0.000122607	0.000125154	0.000126852	0	0	0	0	0	0	0
472	pos_15996	Unknown compound		1	pos	15996	13.95	1028.49	[M+2H]2+																		0	0	0	0	0	0	0	0	0	0	0	0	0.000188915	0.000261811	0.000202998	0.000295919	0	0	0	0	0	0	0
473	pos_1605	Simple ID		1	pos	1605	13.631	222.112	[M+H]+	generic	C12H15NO3	Helquinoline	6.3448	6.3448	Unknown	3	34	222.112	[M+H]+	221.105	0.0009698	3.879	Quinoline carboxylic acids	IPTOSMSQJARNQN-XVKPBYJWSA-N	O=C(O)C1=CC=CC2=C1NC(C)CC2OC	NPA=NPA016685,COCONUT=CNP0253794	0	0	0	0	0	0	8.71022e-05	8.90468e-05	8.14338e-05	0	0	0	6.13438e-05	5.54362e-05	6.23584e-05	6.02353e-05	0.000281012	0.000216601	0.000268269	0.000206414	0.000170995	0.000164199	0
474	pos_16053	Unknown compound		1	pos	16053	13.889	1037.49	[M+2H]2+																		0	0	0	0	0	0	0	0	0	0	0	0	0.00011177	0.000125231	0.000102943	0.000113749	0	0	0	0	0	0	0
475	pos_16242	Simple ID		1	pos	16242	11.256	1088.54	[M+H]+	generic	C69H73N3O9	CNP0440213	4.9104	4.9104	Unknown	3	302	1088.54	[M+H]+	1087.53	0.0009574	2.722	Naphthopyrans	OEKGBHOMULNVJY-UHFFFAOYSA-N	OC1=CC=CC(=C1)CC2=CC(=CC=C2O)CCC3C#CC=4C=C(N=C5C4COC(CCC3)CC(O)C6C=CC=7C(OCC8=CC(=CC9=CN5C=C98)C%10%11C=%12C=CC=CC%12C%13(CCCC%13)CC%11COCC%10)=C(O)C=C(C7C6)CO)NCOC	COCONUT=CNP0440213	0	0	0	0	0	0	0	0	0	0	0	0	7.09647e-05	8.46524e-05	0	0	0	0	0	0	0	0	0.000213796
476	pos_1625	Simple ID		1	pos	1625	10.135	223.153	[M+H]+	generic	C10H22O5	UNPD76039	4.1957	4.1957	Unknown	3	48	223.153	[M+H]+	222.147	0.0010003	2.351	Fatty alcohols	YNWGIYBRIPKRJK-SLOTWNJKNA-N	OCC(O)(C)C(O)(C)C(O)(C)C(O)(C)C	UNPD=UNPD76039,COCONUT=CNP0316522	0	0	0	0	0	0	0	0	0.000267738	0	0	0	5.77621e-05	0	0	0	0.00011732	0.000119082	0.000114827	0	0	0	0
477	pos_16348	Simple ID		1	pos	16348	11.427	1133.55	[M+H]+	generic	C58H84O22	Tragopogonsaponin E	4.9625	4.9625	Unknown	3	125	1133.55	[M+H]+	1132.55	-0.0002992	2.908	Triterpene saponins	FQDYAELZPDIZMA-RVDMUPIBNA-N	O=C(OC1C(OC(=O)C23CCC(C)(C)CC3C4=CCC5C6(C)CCC(OC7OC(C(=O)OC)C(O)C(O)C7O)C(C)(C)C6CCC5(C)C4(C)CC2O)OCC(O)C1O)C=CC8=CC=C(OC9OC(CO)C(O)C(O)C9O)C(OC)=C8	KNApSAcK=C00040531,UNPD=UNPD58685;UNPD85760,COCONUT=CNP0230657	0	0	0	0	0	0	0	0	0	0	0	0	7.91769e-05	8.53046e-05	7.77432e-05	8.33314e-05	0	0	0	0	0	0	0
478	pos_1637	Simple ID		1	pos	1637	11.189	224.074	[M+H]+	generic	C11H13NO2S	Pulicatin A	5.6673	5.6673	Unknown	3	56	224.074	[M+H]+	223.067	7.61e-05	3.571	1-hydroxy-4-unsubstituted benzenoids	ZVWPMYHMXUXIMC-OWWGPPLWNA-N	OC=1C=CC=CC1C2=NC(CO)C(S2)C	ChEBI=CHEBI:70584;CHEBI:70585,UNPD=UNPD165569;UNPD51757,NPA=NPA002431;NPA012537,COCONUT=CNP0169616	0	0	0	8.88252e-05	9.28296e-05	0	0.000335956	0.000290426	0.000275555	0	0	0	7.00626e-05	7.56894e-05	6.36929e-05	7.18302e-05	0	0	0	0	0.000101601	0.000111744	0
479	neg_371	Double ID		2	neg	371	10.63	222.077	[M-H]-	generic	C11H13NO4	N-Acetyl-L-tyrosine	8.029	8.029	Unknown	3	26	222.077	[M-H]-	223.084	0.0001814	4.591	Tyrosine and derivatives	CAHKINHBCWCHCF-JTQLQIEISA-N	O=C(O)C(NC(=O)C)CC1=CC=C(O)C=C1	HMDB=HMDB0000866,ChEBI=CHEBI:21563;CHEBI:68561;CHEBI:133591,YMDB=YMDB00996,FooDB=FDB022288,BMDB=BMDB00866,Urine=HMDB0000866,Feces=HMDB0000866,Serum=HMDB0000866,BLEXP=BLEXPDB00000089216,COCONUT=CNP0329241	0	0	0	0	0	0	0.0042851	0.00305404	0.00320889	0	0	0	0	0.000653829	0.000679527	0.000661597	0	0	0	0	0	0	0
480	pos_16095	Simple ID		2	pos	16095	11.563	1048.54	[M+H]+	generic	C63H73N3O11	1-(1-{4a-[1-(5-{3,11-dihydroxy-15-methoxy-13-[(2-methyl-decahydroquinolin-8a-yl)oxy]-6-oxa-10-azapentacyclo[10.6.2.0?,?.0?,??.0??,??]icosa-1,7,9(19),12,14,16(20)-hexaen-4-yl}-2-hydroxy-3-methoxyphenoxy)-3-hydroxypropan-2-yl]-1,2,3,4,4a,10a-hexahydrophenanthren-1-yl}cyclohexyl)-2,5-dihydro-1H-pyrrole-2,5-dione	4.999	4.999	Unknown	3	148	1048.54	[M+H]+	1047.52	-0.0042134	3.008	3'-O-methylated isoflavonoids	LVCADEYXWRBROV-UHFFFAOYSA-N	O=C1C=CC(=O)N1C2(CCCCC2)C3CCCC4(C=5C=CC=CC5C=CC34)C(CO)COC6=CC(=CC(OC)=C6O)C7COC=8C=C9NC(O)C=%10C(OC%11%12NC(C)CCC%12CCCC%11)=CC(OC)=C%13C%10C9=C(C8C7O)CC%13	COCONUT=CNP0361066	0	0	0	0	0	0	0	0	0	0	0	0	0.000128282	0.000130497	0.000132251	0.000133183	0	0	0	0	0	0	0
481	pos_16448	Simple ID		1	pos	16448	18.351	1164.57	[M+H]+	generic	C69H81NO15	DHA-paclitaxel	4.2858	4.2858	Unknown	3	162	1164.57	[M+H]+	1163.56	-0.0051027	2.543	Taxanes and derivatives	LRCZQSDQZJBHAF-PUBGEWHCSA-N	O=C(OC1C2C3(OC(=O)C)COC3CC(O)C2(C(=O)C(OC(=O)C)C4=C(C)C(OC(=O)C(OC(=O)CCC=CCC=CCC=CCC=CCC=CCC=CCC)C(NC(=O)C=5C=CC=CC5)C=6C=CC=CC6)CC1(O)C4(C)C)C)C=7C=CC=CC7	DrugBank=DB05297,BLEXP=BLEXPDB00006918473	0	0	0	0	0	0	0	0	0	0	0	0	7.54786e-05	7.2376e-05	6.45631e-05	8.15268e-05	0	0	0	0	0.0012337	0	0
482	pos_1645	Simple ID		1	pos	1645	12.827	225.123	[M+H]+	generic	C11H16N2O3	N-[1-(2-furanyl)ethylideneamino]carbamic acid tert-butyl ester	6.2301	6.2301	Unknown	3	55	225.123	[M+H]+	224.116	0.0003688	3.773	Heteroaromatic compounds	HWHKIBIMLPQWAL-UHFFFAOYSA-N	O=C(OC(C)(C)C)NN=C(C=1OC=CC1)C	ChEBI=CHEBI:121516	0.000169599	0.000191958	0.000211647	0	0	0	0.000151677	0.000129612	0.000149497	7.84429e-05	9.86958e-05	0.000141674	5.62442e-05	7.31526e-05	0	6.79318e-05	7.12882e-05	5.29312e-05	8.00712e-05	0.000125526	0.000143844	9.09032e-05	0
483	pos_1081	Simple ID	Other possible annotated peaks for this cluster.	2	pos	1081	14.147	188.164	[M+H]+	generic	C10H21NO2	7-aminodecanoic acid	6.8922	6.8922	Unknown	3	38	188.164	[M+H]+	187.157	0.0002054	4.169	Medium-chain fatty acids	NRKKNXXLTISZHH-UHFFFAOYSA-N	O=C(O)CCCCCC(N)CCC	COCONUT=CNP0362333	0	0	0	0.00012059	0.000117261	9.534e-05	0	0	0	0	0	0	6.30896e-05	5.88376e-05	6.09343e-05	6.48864e-05	0.00031024	0.000394396	0.000380273	0	0	0	0
484	pos_16474	Unknown compound		1	pos	16474	11.663	1176.61	[M+H]+																		0	0	0	0	0	0	0	0	0	0	0	0	5.92959e-05	5.83079e-05	0	6.00844e-05	0	0	0	0	0	0	0.000238198
485	pos_1648	Simple ID		1	pos	1648	8.682	225.123	[M+H]+	generic	C11H16N2O3	vinbarbital	6.8043	6.8043	Unknown	3	48	225.123	[M+H]+	224.116	6.88e-05	3.912	Barbituric acid derivatives	RAFOHKSPUDGZPR-UHFFFAOYSA-N	O=C1NC(=O)C(C(=O)N1)(C(=CCC)C)CC	ChEBI=CHEBI:134919,STOFF=STOFF_1056,BLEXP=BLEXPDB00005284636,COCONUT=CNP0377874	0.000254028	0.000266489	0.000263006	0.000136101	0.000146174	0.000131146	0.000327052	0.000289151	0.000322325	0.000454528	0.000471745	0.000461076	0.000191628	0.000204856	0.000204348	0.00019766	0.000163679	0.00013115	0.000170333	0.000268702	0.000289882	0.000277044	5.79032e-05
486	pos_1651	Unknown compound		1	pos	1651	16.003	225.137	[M+H]+																		0.000229102	0.000230948	0.000241982	8.35209e-05	8.99284e-05	9.02413e-05	0.000150925	0.000152502	0.000142312	0.000186943	0.00019573	0.000164884	0.000106377	0.000105369	9.66301e-05	0.000105681	0.000157074	8.2276e-05	0.000138048	0.000128603	0.000162511	0.000182878	0
487	pos_16526	Unknown compound		2	pos	16526	13.344	1216.55	[M+H]+																		0	0	0	0	0	0	0	0	0	0	0	0	0.000193366	0.000182916	0.0001845	0.000192085	0	0	0	0	0	0	0
488	pos_1655	Simple ID		1	pos	1655	23.65	225.148	[M+H]+	generic	C13H20O3	Methyl jasmonate	6.5218	6.5218	Unknown	3	53	225.148	[M+H]+	224.141	0.000721	3.486	Jasmonic acids	GEWDNTWNSAZUDX-LEPXEHPDNA-N	O=C(OC)CC1CCC(=O)C1CC=CCC	HMDB=HMDB0036583,KNApSAcK=C00000219;C00000223,ChEBI=CHEBI:15929;CHEBI:25242,FooDB=FDB001424;FDB015494,LipidMAPS=LMFA02020010;LMFA02020016,PubChem=6427970;5281929,PlantCyc=CPD1F-2,UNPD=UNPD140536;UNPD16262;UNPD207604;UNPD217804,BLEXP=BLEXPDB00000062388,NPA=NPA015076,COCONUT=CNP0252341	0	0	0	0.00519655	0.00409838	0.00428866	0	0	0	0.00249827	0.00337568	0.00323059	0.00117055	0.00110451	0.00102147	0.00115867	0.000930273	0.000391772	0.00107013	0.00180577	0.00248705	0.00106958	0
489	pos_16585	Unknown compound		2	pos	16585	11.622	1303.59	[M+H]+																		0	0	0	0	0	0	0	0	0	0	0	0	0.000138921	0.000146652	0.000138391	0.000148096	0	0	0	0	0	0	0
490	pos_1709	Unknown compound		1	pos	1709	11.728	227.153	[2M+H]+																		0.000152825	0.000192837	0.000181316	0.000182222	0	0.000160593	0.00017422	0.000183245	0.000194451	0.000321255	0.000307428	0	0.000154314	0.000149903	0	0.000162152	0	0	0	0.000439684	0.000413585	0.000323356	0
491	pos_1714	Unknown compound		1	pos	1714	15.815	227.174	[M+H]+																		0.000371613	0.000372341	0.000370078	0.000164572	0.000158964	0.000171412	0.000513382	0.000442607	0.000422131	0.000333333	0.000332493	0.00031528	0.0002486	0.000249656	0.000240152	0.000246697	0.000196005	0.000162722	0.000209199	0.000354203	0.000410425	0.000380161	6.72769e-05
492	pos_172	Simple ID		1	pos	172	1.725	121.064	[M+H]+	generic	C8H8O	Phenylacetaldehyde	5.6276	5.6276	Unknown	3	11	121.064	[M+H]+	120.058	0.0005913	2.681	Phenylacetaldehydes	DTUQWGWMVIHBKE-UHFFFAOYSA-N	O=CCC=1C=CC=CC1	HMDB=HMDB0006236,KNApSAcK=C00007535,ChEBI=CHEBI:16424,DrugBank=DB02178,YMDB=YMDB00116,T3DB=T3D4805,FooDB=FDB012238,BMDB=BMDB06236,Feces=HMDB0006236,ECMDB=ECMDB06236,PubChem=998,PlantCyc=PHENYLACETALDEHYDE,UNPD=UNPD12381,BLEXP=BLEXPDB00000000998,COCONUT=CNP0175320	0.0008446	0.000857877	0.000878025	0.000584928	0.000504616	0.000546977	0.0010708	0.000985427	0.00103799	0.000961263	0.000915238	0.00090362	0.00100677	0.00111316	0.00118049	0	0.000925489	0.000852203	0.000977969	0	0	0	0
493	pos_173	Simple ID		1	pos	173	1.83	121.065	[M+H]+	generic	C8H8O	4-Hydroxystyrene	6.7733	6.7733	Unknown	3	20	121.065	[M+H]+	120.058	-0.0001087	3.673	Styrenes	FUGYGGDSWSUORM-UHFFFAOYSA-N	OC1=CC=C(C=C)C=C1	HMDB=HMDB0004072,KNApSAcK=C00050421,ChEBI=CHEBI:1883,YMDB=YMDB01627,FooDB=FDB007453;FDB010540,STOFF=STOFF_10028,BMDB=BMDB04072,PubChem=62453,UNPD=UNPD62341,BLEXP=BLEXPDB00000062453,COCONUT=CNP0119518	0	0	0	0	0	0	0	0	0	0	0	0	0	0	0	0.00113746	0	0	0	0.00511096	0.00400095	0.00331792	0.000243263
494	pos_1784	Simple ID		1	pos	1784	20.707	230.211	[M+H]+	generic	C13H27NO2	UNPD74914	5.5897	5.5897	Unknown	3	33	230.211	[M+H]+	229.204	0.0001556	3.654	Acetamides	ALYVSRVEIXQWJX-VEZULTJBNA-N	O=C(NC(C)C(O)CCCCCCCC)C	UNPD=UNPD74914,COCONUT=CNP0315647	0	0	0	0.000377404	0.00067522	0.000512283	0	0	0	0	0	0	0.000103655	9.56547e-05	0	0	0	0	0	0	0	0	0
495	pos_179	Simple ID		1	pos	179	4.23	122.096	[M+H]+	generic	C8H11N	Phenylethylamine	8.0659	8.0659	Unknown	3	19	122.096	[M+H]+	121.089	0.0002258	4.083	Phenethylamines	BHHGXPLMPWCGHP-UHFFFAOYSA-N	NCCC=1C=CC=CC1	HMDB=HMDB0012275;HMDB0060276,KNApSAcK=C00001426,ChEBI=CHEBI:18397;CHEBI:225237,DrugBank=DB04325,YMDB=YMDB01558,FooDB=FDB010580,STOFF=STOFF_8792,BMDB=BMDB12275,Urine=HMDB0012275,ECMDB=ECMDB02654,Serum=HMDB0012275,PubChem=448751;1001,PlantCyc=PHENYLETHYLAMINE,UNPD=UNPD190685,BLEXP=BLEXPDB00000001001,COCONUT=CNP0141127	0.0016345	0.00145191	0.00154974	0.00110917	0.000936769	0.00102534	0.00170117	0.00144236	0	0.000848593	0	0.000727059	0.00136514	0.00145576	0.00152307	0	0.00187955	0.0015023	0.00190859	0.00521849	0	0.00278306	0
496	pos_1791	Simple ID		1	pos	1791	16.299	231.065	[M+H]+	generic	C13H10O4	(-)-2,3-Dihydro-6-hydroxy-2-methyl-naphtho[1,2-b]furan-4,5-dione;(-)-Nocardione A;A 1211a;Nocardione A	7.1468	7.1468	Unknown	3	45	231.065	[M+H]+	230.058	0.0002853	3.767	Naphthofurans	FTSDAQTXFRWHEN-MDOHGIEYNA-N	O=C1C(=O)C2=C(OC(C)C2)C=3C=CC=C(O)C13	KNApSAcK=C00015515,ChEBI=CHEBI:66634,UNPD=UNPD142718,NPA=NPA018177,COCONUT=CNP0154109	0	0	0	0.000243553	0.00017372	0.000179582	9.45852e-05	8.04537e-05	7.9308e-05	0.00020758	0.000374316	0.00043688	9.87532e-05	8.63998e-05	9.04624e-05	0.000107787	0	0	0	0.000380321	0.00037226	0.000158782	0
497	pos_1824	Simple ID		1	pos	1824	12.207	232.154	[M+H]+	generic	C11H21NO4	Butyrylcarnitine	8.0143	8.0143	Unknown	3	33	232.154	[M+H]+	231.147	0.0008346	4.843	Acyl carnitines	QWYFHHGCZUCMBN-UHFFFAOYNA-N	O=C([O-])CC(OC(=O)CCC)C[N+](C)(C)C	HMDB=HMDB0002013;HMDB0062510,ChEBI=CHEBI:7676;CHEBI:21949,YMDB=YMDB01536,FooDB=FDB022795,BMDB=BMDB02013,LipidMAPS=LMFA07070003;LMFA07070054,Urine=HMDB0002013,Saliva=HMDB0002013,CSF=HMDB0002013,Serum=HMDB0002013,BLEXP=BLEXPDB00000439829,COCONUT=CNP0082963	0	0	0	0.00015499	0.000102224	0.000164037	0	0	0	0	0	0	0.000344016	0.000360217	0.000365798	0.000416836	0.00250595	0.00294227	0.00235816	0	0	0	0
498	pos_1825	Double ID		2	pos	1825	12.953	232.154	[M+H]+	generic	C11H21NO4	Butyrylcarnitine	8.0578	8.0578	Unknown	3	24	232.154	[M+H]+	231.147	0.0007346	4.892	Acyl carnitines	QWYFHHGCZUCMBN-UHFFFAOYNA-N	O=C([O-])CC(OC(=O)CCC)C[N+](C)(C)C	HMDB=HMDB0002013;HMDB0062510,ChEBI=CHEBI:7676;CHEBI:21949,YMDB=YMDB01536,FooDB=FDB022795,BMDB=BMDB02013,LipidMAPS=LMFA07070003;LMFA07070054,Urine=HMDB0002013,Saliva=HMDB0002013,CSF=HMDB0002013,Serum=HMDB0002013,BLEXP=BLEXPDB00000439829,COCONUT=CNP0082963	0	0	0	0.00285908	0.00177962	0.00217191	0	0	0	0	0	0	0.00248448	0.002486	0.00245377	0.0024141	0.0138724	0.0123087	0.0142594	0	0	0	0
499	pos_1866	Unknown compound		1	pos	1866	16.071	234.205	[M+H]+																		8.60494e-05	0	0.00011805	4.74681e-05	0	0.000101222	0.000344242	0.000125027	0.000115592	0	0	0.000301716	7.88088e-05	7.70676e-05	6.48448e-05	7.49437e-05	5.29915e-05	0	0	0	0.00019485	0.000163756	0
500	pos_187	Simple ID		1	pos	187	1.324	123.055	[M+H]+	generic	C6H6N2O	Niacinamide	5.2777	5.2777	Unknown	3	14	123.055	[M+H]+	122.048	0.0003893	3.005	Nicotinamides	DFPAKSUCGFBDDF-UHFFFAOYSA-N	O=C(N)C=1C=NC=CC1	HMDB=HMDB0001406,KNApSAcK=C00000209,ChEBI=CHEBI:17154,DrugBank=DB02701,SMPDB=PW_C001086,YMDB=YMDB00274,T3DB=T3D4168,FooDB=FDB012485,STOFF=STOFF_80,BMDB=BMDB01406,Urine=HMDB0001406,Feces=HMDB0001406,ECMDB=ECMDB01406,Serum=HMDB0001406,PubChem=936,PlantCyc=NIACINAMIDE,UNPD=UNPD180877,BLEXP=BLEXPDB00000000936,COCONUT=CNP0150794	0.00361107	0.00361529	0.00411132	0.00207142	0.00190402	0.00194324	0.00525543	0.00439486	0.0046039	0.00439343	0.00417393	0.00626363	0.00302455	0.00300791	0.00309404	0.00300558	0.00329849	0.00255705	0.00336703	0.00427181	0.00505817	0.00344209	0
501	pos_1878	Unknown compound		1	pos	1878	0.927	235.119	[M+Na]+																		0.0383149	0.0382426	0.0368266	0.029521	0.0287435	0.0246538	0.0408044	0.0361764	0.0380129	0.0307213	0.0398208	0.0386013	0.0297128	0.0281482	0.0269527	0.0275433	0.0218844	0.0182858	0.0251658	0.0247807	0.0360241	0.0310172	0.00641434
502	pos_188	Simple ID		1	pos	188	0.983	123.055	[M+H]+	generic	C6H6N2O	Niacinamide	5.2387	5.2387	Unknown	3	20	123.055	[M+H]+	122.048	0.0003893	2.966	Nicotinamides	DFPAKSUCGFBDDF-UHFFFAOYSA-N	O=C(N)C=1C=NC=CC1	HMDB=HMDB0001406,KNApSAcK=C00000209,ChEBI=CHEBI:17154,DrugBank=DB02701,SMPDB=PW_C001086,YMDB=YMDB00274,T3DB=T3D4168,FooDB=FDB012485,STOFF=STOFF_80,BMDB=BMDB01406,Urine=HMDB0001406,Feces=HMDB0001406,ECMDB=ECMDB01406,Serum=HMDB0001406,PubChem=936,PlantCyc=NIACINAMIDE,UNPD=UNPD180877,BLEXP=BLEXPDB00000000936,COCONUT=CNP0150794	0.00202436	0.0021698	0.00233565	0.000957029	0.000738172	0.000844627	0.00238965	0.00174307	0.00186649	0	0.00243211	0.00290714	0.00127283	0.00128464	0.00123822	0.0012749	0.00149547	0.00118926	0.00162123	0.00132558	0.00205076	0.00144705	0
503	pos_1894	Simple ID		1	pos	1894	7.8	236.077	[M+H]+	generic	C8H13NO7	N-acetyl-D-mannosaminouronic acid	4.737	4.737	Unknown	3	51	236.077	[M+H]+	235.069	-0.0001218	2.687	N-acyl-alpha-hexosamines	KSOXQRPSZKLEOR-YWVKXGPRSA-N	O=C(O)C1OC(O)C(NC(=O)C)C(O)C1O	ChEBI=CHEBI:73777;CHEBI:85106,UNPD=UNPD5252,COCONUT=CNP0193061	0	7.54278e-05	8.99646e-05	9.70034e-05	0.000116133	0.00010789	0.000124441	0.000141528	0.000146512	0.000241976	0.000192048	0.00019717	9.16555e-05	9.95008e-05	0.000101367	0	0	0	0	0	0	0	0
504	pos_1516	Simple ID	Other possible annotated peaks for this cluster.	2	pos	1516	12.616	215.139	[M+H]+	generic	C10H18N2O3	Dethiobiotin	6.9853	6.9853	Unknown	3	19	215.139	[M+H]+	214.132	0.0004189	3.904	Medium-chain fatty acids	AUTOLBMXDDTRRT-HGXVMFPFNA-N	O=C1NC(C)C(N1)CCCCCC(=O)O	HMDB=HMDB0003581,KNApSAcK=C00000757,ChEBI=CHEBI:16691;CHEBI:42280;CHEBI:36998;CHEBI:37000;CHEBI:57861,DrugBank=DB03775,SMPDB=PW_C001932,YMDB=YMDB00075,FooDB=FDB023201,BMDB=BMDB03581,ECMDB=ECMDB03581,PubChem=25244917;445027;643,PlantCyc=DETHIOBIOTIN,UNPD=UNPD29718,BLEXP=BLEXPDB00000000643,COCONUT=CNP0229365	0	0.000102836	0.000137077	0	0	0	0.00118909	0.000819825	0.000682963	0	0	0.000272013	0.000149462	0.000173025	0.000175217	0.000186585	0	0	0	0.000523184	0.000855557	0.000364564	0
505	pos_1905	Simple ID		1	pos	1905	1.63	237.133	[M+H]+	generic	C10H20O6	C00050882	5.2141	5.2141	Unknown	3	57	237.133	[M+H]+	236.126	-3.52e-05	3.189	O-glycosyl compounds	MJQQYLKJAGVSNG-IWPYZRQSNA-N	OCC1OC(OCC(C)C)C(O)C(O)C1O	KNApSAcK=C00050882,UNPD=UNPD196730,COCONUT=CNP0180838	0.000793293	0.000770628	0.00080359	0.000321974	0.000302876	0.000313169	0.00106151	0.000982553	0.00103514	0.000882412	0.000884752	0.00106803	0.000513802	0.000580316	0.00060419	0	0.000519905	0.000395979	0.000479971	0	0	0	0
506	pos_1906	Simple ID		1	pos	1906	1.784	237.134	[M+H]+	generic	C11H16N4O2	6-[(1H-imidazol-2-yl)methyl]-4-methyl-octahydropyrrolo[3,4-b][1,4]oxazin-3-one	5.6147	5.6147	Unknown	3	53	237.133	[M+H]+	236.127	0.0011022	3.2	Aralkylamines	ONESKRQTGYEEPL-UHFFFAOYSA-N	O=C1N(C)C2CN(CC3=NC=CN3)CC2OC1	COCONUT=CNP0003726	0	0	0	0	0	0	0	0	0	0	0	0	0	0	0	0.000592239	0	0	0	0.000697632	0.00075141	0.000531716	8.28106e-05
507	pos_1908	Unknown compound		1	pos	1908	24.16	237.147	[M+H]+																		0	0	0	0.000724537	0.000631482	0.000631066	0	0	0	0	0	0	9.8763e-05	9.97771e-05	9.26903e-05	9.79121e-05	0	0	0	0	0	0	0
508	neg_461	Double ID		2	neg	461	12.94	236.093	[M-H]-	generic	C12H15NO4	UNPD223874	7.1527	7.1527	Unknown	3	30	236.093	[M-H]-	237.1	0.0003315	3.993	Tetrahydroisoquinolines	LXQHGFYWCMBZNJ-RCOVLWMOSA-N	O=C(O)C1NC(C=2C(OC)=CC(O)=CC2C1)C	UNPD=UNPD223874,COCONUT=CNP0191088	0.00249031	0.00265586	0.00228273	0.000796582	0.000335928	0	0	0	0	0.000716013	0	0	0.000756053	0.000609095	0.000599138	0.000644206	0	0.000251014	0	0.000806608	0	0.00362926	0
509	pos_1944	Simple ID		2	pos	1944	13.354	239.138	[M+H]+	generic	C12H18N2O3	UNPD93774	6.0942	6.0942	Unknown	3	52	239.138	[M+H]+	238.132	0.0006189	3.614	Alpha amino acids and derivatives	SIXHCCPAJIVTOY-UITAMQMPSA-N	O=C1C(N=C(C(=O)N1O)CC(C)C)=CC(C)C	UNPD=UNPD93774,NPA=NPA017441,COCONUT=CNP0329602	0.000182571	0.00017096	0.000181361	0	0	0	0.000303735	0.000225321	0.000277885	0.000137391	0.000200415	0.000228756	9.23052e-05	0.000105806	0.000101951	0.000100948	0.000156144	0.000120575	0.000139319	0.000250711	0.000248247	0.000201412	0
510	pos_1945	Simple ID		1	pos	1945	10.868	239.139	[M+H]+	generic	C12H18N2O3	UNPD23998	6.3191	6.3191	Unknown	3	62	239.139	[M+H]+	238.132	0.0004189	3.755	L-alpha-amino acids	KDGLQQMZRURUHE-LDGXTIHJNA-N	O=C1C=CN(C(=C1)C)CCCCC(N)C(=O)O	UNPD=UNPD23998,COCONUT=CNP0239969	0.000152684	0.000142749	0.000158905	0.000150453	0.000144178	0.000143569	0.00015711	0	0	0.000224235	0.000249519	0.000247143	0.00012115	0.000144857	0	0	0.00017493	0.000149793	0.00016818	0	0	0.000185065	0
511	pos_1990	Unknown compound		1	pos	1990	9.788	241.153	[M+H]+																		0.000572712	0.000583661	0.00064044	0.000115081	0.000118402	0.000106434	0.000553888	0.000479914	0.000554598	0.000595675	0.000559291	0.000640951	0.00031679	0.000351798	0.00035627	0.000364676	0.000310994	0.000239913	0.000276334	0.000793759	0.000837772	0.00063604	0
512	pos_2056	Simple ID		1	pos	2056	9.999	244.107	[M+H]+	generic	C13H13N3O2	Cyclo(glycyltryptophyl)	6.4814	6.4814	Unknown	3	26	244.107	[M+H]+	243.101	0.0005531	3.673	Alpha amino acids and derivatives	IFQZEERDQXQTLJ-LDGXTIHJNA-N	O=C1NC(C(=O)NC1)CC2=CNC=3C=CC=CC32	ChEBI=CHEBI:69031,UNPD=UNPD208033,NPA=NPA015135,COCONUT=CNP0362548	0.000162613	0.000165288	0.000170765	8.73125e-05	9.0154e-05	9.69018e-05	0.000245051	0.000219181	0.00023243	0.000122191	0.000181283	0.000143353	0.000118317	0.000134863	0.000145949	0.000150501	0.000112417	9.05138e-05	0.000109687	0.00021417	0.000215221	0.000188017	0
513	pos_206	Unknown compound		1	pos	206	11.12	123.092	[M+H]+																		0.000258935	0.000285678	0.000254809	0.000225094	0.000265082	0.000252902	0.000245853	0.000258455	0	0.000263904	0.000241881	0.000229451	0.000218668	0.00017116	0.000165912	0.000200337	0	0	0	0	0.000224012	0.000138013	2.98306e-05
514	pos_2082	Simple ID		1	pos	2082	6.045	245.096	[M+H]+	generic	C10H16N2O3S	Biotin	7.3954	7.3954	Unknown	3	33	245.096	[M+H]+	244.088	-0.0003602	4.064	Biotin and derivatives	YBJHBAHKTGYVGT-ZKWXMUAHSA-N	O=C1NC2CSC(CCCCC(=O)O)C2N1	HMDB=HMDB0000030,KNApSAcK=C00000756,ChEBI=CHEBI:15956;CHEBI:57586;CHEBI:94689;CHEBI:95156,DrugBank=DB00121;DB04650,SMPDB=PW_C000020,YMDB=YMDB00282,T3DB=T3D2690,FooDB=FDB014510,STOFF=STOFF_292,BMDB=BMDB00030,Urine=HMDB0000030,Saliva=HMDB0000030,ECMDB=ECMDB00030,CSF=HMDB0000030,Serum=HMDB0000030,PubChem=6560210;171548,PlantCyc=BIOTIN,UNPD=UNPD115628;UNPD168877,BLEXP=BLEXPDB00000000253,NPA=NPA013155…	0.000115063	9.30027e-05	0.000100379	0.000120776	0.000112823	0.000129729	0.00025522	0.00023387	0.000233858	0	0.000119222	0	0.000117191	0.000128271	0.000130714	0	0.000103677	7.49965e-05	9.34711e-05	0	0	0	0
515	pos_2084	Unknown compound		1	pos	2084	13.309	245.127	[M+H]+																		0.0122747	0.0110426	0.0127538	0.0102664	0.00986791	0.00974743	0.0288899	0.0257544	0.0262096	0.0108875	0.0146061	0.0137306	0.0118023	0.0124973	0.0128115	0.0132341	0.0125652	0.00961726	0.0125549	0.023948	0.0242078	0.0226136	0.00307486
516	pos_2102	Simple ID		1	pos	2102	13.156	246.169	[M+H]+	generic	C12H23NO4	Valerylcarnitine	7.7636	7.7636	Unknown	3	33	246.169	[M+H]+	245.163	0.0008847	4.745	Acyl carnitines	VSNFQQXVMPSASB-JTQLQIEISA-N	O=C([O-])CC(OC(=O)CCCC)C[N+](C)(C)C	HMDB=HMDB0013128,ChEBI=CHEBI:85095;CHEBI:86050,FooDB=FDB029301,LipidMAPS=LMFA07070111,Urine=HMDB0013128,CSF=HMDB0013128,Serum=HMDB0013128,BLEXP=BLEXPDB00006426903,COCONUT=CNP0031467	0	0	0	0	0	0	0	0	0	0	0	0	0.00263415	0.00269345	0.00244522	0.0026708	0.0146324	0.0128036	0.0148851	0	0	0	0
517	pos_2103	Double ID		2	pos	2103	15.113	246.169	[M+H]+	generic	C12H23NO4	UNPD20824	7.9158	7.9158	Unknown	3	27	246.169	[M+H]+	245.163	0.0008847	4.851	Pyrrolizidines	CGZUVSCEWJVPBT-WEHCSCFCNA-N	OCC1N2C(CCC(O)C)CCC2C(O)C1O	UNPD=UNPD20824;UNPD9762,COCONUT=CNP0169694	0	0	0	0.00182717	0.00188931	0.00166025	0	0	0	0	0	0	0.000882178	0.000823478	0.000798104	0.000911013	0.00373598	0.00387983	0.00402234	0	0	0	0
518	neg_525	Double ID		3	neg	525	12.87	244.155	[M-H]-	generic	C12H23NO4	UNPD128992	6.8665	6.8665	Unknown	3	24	244.155	[M-H]-	245.163	0.0001318	4.242	Isoleucine and derivatives	HCJPXSNTTTZCOR-SLOTWNJKNA-N	O=C(O)C(N(C(=O)C(O)C(C)C)C)C(C)CC	UNPD=UNPD128992,COCONUT=CNP0335182	0	0	0	0	0	0	0	0	0	0	0	0	0.0025426	0.00222045	0.0023411	0.00230777	0.00920064	0.00930362	0.00798237	0	0	0	0
519	pos_2106	Unknown compound		1	pos	2106	18.871	246.205	[M+H]+																		0	0	0	0.00035889	9.44688e-05	0.000136673	0	0	0	0	0	0	0.000368949	0.00034046	0.000324771	0.000355505	0.0018984	0.00285088	0.00219122	0	0	0	0
520	pos_2110	Simple ID		1	pos	2110	13.424	247.107	[M+H]+	generic	C13H14N2O3	N-acetyltryptophan	5.7914	5.7914	Unknown	3	25	247.107	[M+H]+	246.1	0.0012188	3.166	N-acyl-alpha amino acids	DZTHIGRZJZPRDV-STGVRZAANA-N	O=C(O)C(N=C(O)C)CC1=CNC=2C=CC=CC21	HMDB=HMDB0013713,ChEBI=CHEBI:16734;CHEBI:57877;CHEBI:70976;CHEBI:74640;CHEBI:133746,YMDB=YMDB00823,Urine=HMDB0013713,Feces=HMDB0013713,UNPD=UNPD30823,BLEXP=BLEXPDB00000002002,NPA=NPA015473,COCONUT=CNP0293251	0.000359917	0.00035248	0.000386402	9.2521e-05	9.3546e-05	0.000105117	0.00064868	0.000545025	0.000558062	0.000169808	0.000178068	0.000227201	0.000189325	0.000220684	0.000201426	0.000215783	0.000170364	0.000142363	0.000168747	0.000228924	0.000259481	0.000235076	0
521	pos_2111	Simple ID		1	pos	2111	7.881	247.107	[M+H]+	generic	C13H14N2O3	Hyrtioerectine B	6.8005	6.8005	Unknown	3	47	247.107	[M+H]+	246.1	0.0011188	3.677	Harmala alkaloids	WYQWRMWMBQUYSD-ZLLSCFOKNA-N	O=C(O)C1NC(C=2NC=3C=CC(O)=CC3C2C1)C	KNApSAcK=C00042602,NANPDB=NANPDB_3965,UNPD=UNPD188028;UNPD218046,COCONUT=CNP0284879	0.000181135	0.000197278	0.000216738	0	7.18357e-05	0	0.000194619	0.000166654	0.000181115	0.000229237	0.000216115	0.000243624	0.00011162	0.000110158	0.000109406	0	0.000111096	9.59611e-05	0.000109553	0	0	0	0
522	pos_2112	Simple ID		1	pos	2112	9.313	247.107	[M+H]+	generic	C13H14N2O3	Hyrtioerectine B	6.7341	6.7341	Unknown	3	66	247.107	[M+H]+	246.1	0.0011188	3.442	Harmala alkaloids	WYQWRMWMBQUYSD-ZLLSCFOKNA-N	O=C(O)C1NC(C=2NC=3C=CC(O)=CC3C2C1)C	KNApSAcK=C00042602,NANPDB=NANPDB_3965,UNPD=UNPD188028;UNPD218046,COCONUT=CNP0284879	0.000177488	0.000180214	0.00018782	7.16692e-05	8.5301e-05	7.1858e-05	0.000235928	0.000213189	0.000219845	0.000164611	0.000195633	0.000160142	0.000111042	0.000124492	0.000124013	0.000130837	9.13512e-05	7.67023e-05	9.05794e-05	0.000200011	0.00019698	0.000180135	0
523	pos_2113	Simple ID		1	pos	2113	7.943	247.107	[M+H]+	generic	C13H14N2O3	Hyrtioerectine B	5.6671	5.6671	Unknown	3	56	247.107	[M+H]+	246.1	0.0010188	3.172	Harmala alkaloids	WYQWRMWMBQUYSD-ZLLSCFOKNA-N	O=C(O)C1NC(C=2NC=3C=CC(O)=CC3C2C1)C	KNApSAcK=C00042602,NANPDB=NANPDB_3965,UNPD=UNPD188028;UNPD218046,COCONUT=CNP0284879	0	0	0	0	0	0	0	0	0	0	0	0	0	0	0.000109406	0.000121214	0	0	0	0.000211805	0.000236764	0.000189665	0
524	pos_2125	Unknown compound		2	pos	2125	12.541	248.101	[M+H]+																		0.00019729	0.000218413	0.000236399	0	0	0	0.000350268	0.000289646	0.000338058	0.000122779	0.000173027	0.000362204	7.70003e-05	8.74024e-05	9.5754e-05	8.05441e-05	0	0	0	0.000323805	0.000353957	0.000241725	0
525	pos_2132	Simple ID		1	pos	2132	11.565	249.09	[M+H]+	generic	C9H16N2O4S	2-[[2-formamido-4-(methylthio)-1-oxobutyl]amino]propanoic acid	6.1344	6.1344	Unknown	3	33	249.09	[M+H]+	248.083	5.44e-05	3.991	Dipeptides	GBWVAAKKEIOROG-UHFFFAOYNA-N	O=CNC(C(=O)NC(C(=O)O)C)CCSC	ChEBI=CHEBI:91785,COCONUT=CNP0332685	0	0	0	0	0	0	0	0	0	0.000171067	0.000179244	0.000303774	7.94876e-05	8.15701e-05	8.73693e-05	7.72565e-05	7.8302e-05	5.24551e-05	6.57565e-05	0.000984885	0.00109979	0.000186182	0
526	pos_2139	Simple ID		1	pos	2139	9.201	249.124	[M+H]+	generic	C13H16N2O3	Abbeymycin	6.531	6.531	Unknown	3	37	249.124	[M+H]+	248.116	-0.0004312	3.848	1,4-benzodiazepines	SSMFXCDUJJPFBJ-YCJUWHKPNA-N	O=C1C=2C=CC=CC2NC(OC)C3N1CC(O)C3	KNApSAcK=C00017837,UNPD=UNPD48353,NPA=NPA020829,COCONUT=CNP0345630	0.000216299	0.000190477	0	0.000136132	0.000137407	0.000129329	0.000345156	0.000358656	0.000366784	0	0.000208721	0.000193805	0.000167689	0.000195633	0.000195495	0.000204588	0.000141344	0.000118173	0.000161909	0.000301988	0.000312948	0.000303918	7.73977e-05
527	pos_2145	Simple ID		1	pos	2145	23.349	249.183	[M+Na]+	generic	C14H26O2	Myristoleic acid	6.1176	6.1176	Unknown	3	43	249.183	[M+Na]+	226.193	-9.92e-05	3.481	Long-chain fatty acids	YWWVWXASSLXJHU-WAYWQWQTSA-N	O=C(O)CCCCCCCC=CCCCC	HMDB=HMDB0002000;HMDB0062248,KNApSAcK=C00001229,ChEBI=CHEBI:27781;CHEBI:32370;CHEBI:131381,YMDB=YMDB00680,FooDB=FDB006482;FDB012633,BMDB=BMDB02000,LipidMAPS=LMFA01030051;LMFA01030250,Saliva=HMDB0002000,Feces=HMDB0002000,Serum=HMDB0002000,PubChem=5281119,UNPD=UNPD146697;UNPD59090;UNPD226393,BLEXP=BLEXPDB00000068344,COCONUT=CNP0275417	0	0	0	0	0	0	0	0.000218186	0.000287824	0	0	0	7.3117e-05	7.3467e-05	7.30594e-05	8.08918e-05	0.000186752	9.07081e-05	0.000118174	0	0	0	0
528	pos_2163	Simple ID		1	pos	2163	19.522	250.112	[M+H]+	generic	C10H19NO4S	CNP0437443	6.0327	6.0327	Unknown	3	36	250.112	[M+H]+	249.103	-0.0012445	3.663	Piperidines	LLRZJDDHLDNIIJ-UHFFFAOYSA-N	O=C(O)CC1CCN(CC1CC)S(=O)(=O)C	COCONUT=CNP0437443	0.000200141	0.000269375	0.000240367	0	0	0	0	0.00014482	0.000119289	0.00017554	0	0	0.000129737	0.000116582	0.000106722	0.000106812	9.56214e-05	0.000125422	0	0.000608108	0.000591469	0.000340433	0
529	pos_2164	Simple ID		1	pos	2164	7.144	250.115	[M+Na]+	generic	C10H17N3O3	Cordycedipeptide A;(-)-Cordycedipeptide A	5.1633	5.1633	Unknown	3	38	250.115	[M+Na]+	227.127	0.0007121	3.013	Alpha amino acids and derivatives	LYDWCUQSOZRMRD-QUFPHBPMNA-N	O=C(N)CC1NC(=O)C(NC1=O)C(C)CC	KNApSAcK=C00031688,ChEBI=CHEBI:65362,UNPD=UNPD112137;UNPD163328,NPA=NPA011372,COCONUT=CNP0351327	0.000274072	0.000264537	0.000278534	9.8294e-05	9.36859e-05	9.62013e-05	0.000238971	0.000221248	0.00024004	0.000244546	0.00027072	0.000283473	0.000151527	0.000176199	0.00018651	0	0.000161916	0.000126345	0.000151037	0	0	0	0
530	pos_1725	Simple ID	Other possible annotated peaks for this cluster.	2	pos	1725	7.287	228.134	[M+H]+	generic	C10H17N3O3	Cordycedipeptide A;(-)-Cordycedipeptide A	7.2403	7.2403	Unknown	3	20	228.134	[M+H]+	227.127	-0.0001321	3.859	Alpha amino acids and derivatives	LYDWCUQSOZRMRD-QUFPHBPMNA-N	O=C(N)CC1NC(=O)C(NC1=O)C(C)CC	KNApSAcK=C00031688,ChEBI=CHEBI:65362,UNPD=UNPD112137;UNPD163328,NPA=NPA011372,COCONUT=CNP0351327	0	0	0	0	0	0	0	0	0	0	0	0	0	0	0	0.000570096	0	0	0	0.00084872	0.000877906	0.000741126	7.25152e-05
531	pos_2169	Simple ID		1	pos	2169	14.392	250.144	[M+H]+	generic	C14H19NO3	(4aR,10bR)-4-propyl-3,4a,5,10b-tetrahydro-2H-[1]benzopyrano[4,3-b][1,4]oxazin-9-ol	6.1511	6.1511	Unknown	3	20	250.144	[M+H]+	249.136	-0.0003301	3.594	1-benzopyrans	YOILXOMTHPUMRG-QSKWDSTQNA-N	OC1=CC=C2OCC3N(CCOC3C2=C1)CCC	ChEBI=CHEBI:114178,BLEXP=BLEXPDB00000005117,COCONUT=CNP0109658	0	0	0	0.000125839	7.28544e-05	0.000100274	0	0	0	0	0	0	0.000137012	0.000119752	0.000136945	0.000133032	0.000829757	0.000800936	0.000896991	0	0	0	0
532	pos_2221	Simple ID		1	pos	2221	20.172	253.117	[M+H]+	generic	C12H16N2O4	Alanyl-Tyrosine	7.1238	7.1238	Unknown	3	36	253.117	[M+H]+	252.111	0.0011834	3.828	Dipeptides	ALZVPLKYDKJKQU-UHFFFAOYNA-N	O=C(O)C(NC(=O)C(N)C)CC1=CC=C(O)C=C1	HMDB=HMDB0028699,ChEBI=CHEBI:73395,Feces=HMDB0028699,UNPD=UNPD190307,BLEXP=BLEXPDB00000572319,COCONUT=CNP0315197	0.000240241	0.000248912	0.000229224	0	0	0	0	0	0	0.000238437	0.000225521	0.000173601	7.32368e-05	7.16724e-05	0	0	0	0	0	0.000108391	0.000102398	0.000110215	0
533	pos_1644	Double ID	Other possible annotated peaks for this cluster.	3	pos	1644	11.584	225.123	[M+H]+	generic	C11H16N2O3	6-cyclopropanecarbonyl-4-methyl-octahydropyrrolo[3,4-b][1,4]oxazin-3-one	6.0577	6.0577	Unknown	3	45	225.123	[M+H]+	224.116	0.0004688	3.582	N-acylpyrrolidines	QOKGOCWIFUIPMR-UHFFFAOYSA-N	O=C1N(C)C2CN(C(=O)C3CC3)CC2OC1	COCONUT=CNP0326016	7.55734e-05	6.85114e-05	8.69873e-05	0	0	0	0.000190758	0.000131756	0.000146509	0	0	0	0	0	6.99428e-05	7.07175e-05	7.52664e-05	0	6.27674e-05	0.000103773	0.000108316	7.60711e-05	0
534	pos_2232	Simple ID		1	pos	2232	25.961	253.179	[M+H]+	generic	C15H24O3	Hydroxypelenolide	7.1034	7.1034	Unknown	3	59	253.179	[M+H]+	252.173	0.0003211	3.856	Germacranolides and derivatives	LAOQYXNUSDEVJK-UITAMQMPNA-N	O=C1OC2CC(C)C(O)CC=C(C)CCC2C1C	HMDB=HMDB0036663,KNApSAcK=C00012209,FooDB=FDB015590,UNPD=UNPD6256,COCONUT=CNP0305578	0	0	0	0.00160898	0.00138934	0.00134843	0	0	0	0.00146446	0.00172756	0.00162427	0.000420518	0.000404782	0.000388261	0.000394665	8.84869e-05	3.54516e-05	8.02206e-05	0.00101464	0.00125733	0.000557916	0
535	pos_1827	Double ID		7	pos	1827	12.521	232.154	[M+H]+	generic	C11H21NO4	N(alpha)-t-butoxycarbonyl-L-leucine	7.9515	7.9515	Unknown	3	31	232.154	[M+H]+	231.147	0.0007346	4.898	Leucine and derivatives	MDXGYYOJGPFFJL-QMMMGPOBSA-N	O=C(OC(C)(C)C)NC(C(=O)O)CC(C)C	ChEBI=CHEBI:28702,COCONUT=CNP0367335	0	0	0	0.0175718	0.00909811	0.0138419	0	0	0	0	0	0	0.0307011	0.0317892	0.030484	0.0323675	0.0807271	0.069197	0.0822806	0	0	0	0
536	pos_1095	Simple ID		2	pos	1095	9.72	190.05	[M+H]+	generic	C10H7NO3	Kynurenic acid	7.2593	7.2593	Unknown	3	34	190.05	[M+H]+	189.043	-3.05e-05	4.074	Quinoline carboxylic acids	HCZHHEIFKROPDY-UHFFFAOYSA-N	O=C(O)C1=CC(=O)C=2C=CC=CC2N1	HMDB=HMDB0000715,KNApSAcK=C00026453;C00026494,ChEBI=CHEBI:18344;CHEBI:58454,SMPDB=PW_C000566,YMDB=YMDB01725,T3DB=T3D4160,FooDB=FDB022200,BMDB=BMDB00715,Urine=HMDB0000715,Feces=HMDB0000715,CSF=HMDB0000715,Serum=HMDB0000715,PubChem=25201402;3845,UNPD=UNPD34289,BLEXP=BLEXPDB00000003845,COCONUT=CNP0333612	0.000222718	0.000235676	0.000290542	5.65591e-05	4.69326e-05	4.9391e-05	0.000406842	0.000410436	0.00037706	0.00010024	0.00014017	0.000244558	0.000155695	0.000172772	0.000191955	0.000181089	0.000179435	0.00013208	0.000165827	0.000278664	0.000313464	0.000199051	0
537	pos_2295	Simple ID		1	pos	2295	0.937	256.176	[M+H]+	generic	C11H21N5O2	N-{4-[(diaminomethylidene)amino]butyl}-1-formylpyrrolidine-2-carboxamide	5.7336	5.7336	Unknown	3	43	256.176	[M+H]+	255.17	0.0008014	3.156	Proline and derivatives	KGNZKBCSMDXYAZ-UHFFFAOYSA-N	O=CN1CCCC1C(=O)NCCCCN=C(N)N	COCONUT=CNP0330595	0.00160867	0.00167705	0.00150091	0.000599657	0.000502112	0.000436673	0.000922561	0.000736475	0.000813742	0.00121102	0.00130297	0.00114664	0	0	0	0.000544658	0	0.000358411	0.000511335	0	0	0	0
538	pos_2297	Simple ID		1	pos	2297	5.524	256.176	[M+H]+	generic	C11H21N5O2	N-{4-[(diaminomethylidene)amino]butyl}-1-formylpyrrolidine-2-carboxamide	6.1226	6.1226	Unknown	3	43	256.176	[M+H]+	255.17	0.0007014	3.416	Proline and derivatives	KGNZKBCSMDXYAZ-UHFFFAOYSA-N	O=CN1CCCC1C(=O)NCCCCN=C(N)N	COCONUT=CNP0330595	0	0	0	0	0	0	0	0	0	0	0	0	0	0	0	0.000421782	0	0	0	0.000555518	0.000566421	0.000457515	7.19174e-05
539	pos_2299	Simple ID		1	pos	2299	5.25	256.176	[M+H]+	generic	C11H21N5O2	N-{4-[(diaminomethylidene)amino]butyl}-1-formylpyrrolidine-2-carboxamide	6.1126	6.1126	Unknown	3	47	256.176	[M+H]+	255.17	0.0006014	3.398	Proline and derivatives	KGNZKBCSMDXYAZ-UHFFFAOYSA-N	O=CN1CCCC1C(=O)NCCCCN=C(N)N	COCONUT=CNP0330595	0.000307673	0.000302447	0.000330607	0.000192909	0.000177781	0.000190592	0	0	0	0	0	0	0.000245598	0.000290393	0.000308525	0	0	0.000206931	0	0	0	0	0
540	pos_2306	Simple ID		1	pos	2306	32.287	256.264	[M+H]+	generic	C16H33NO	Palmitic amide	5.9483	5.9483	Unknown	3	51	256.264	[M+H]+	255.256	-8.9e-06	3.577	Fatty amides	HSEMFIZWXHQJAE-UHFFFAOYSA-N	O=C(N)CCCCCCCCCCCCCCC	HMDB=HMDB0012273,KNApSAcK=C00037269,ChEBI=CHEBI:74475,FooDB=FDB011671,BMDB=BMDB12273,LipidMAPS=LMFA08010009,UNPD=UNPD146161,BLEXP=BLEXPDB00000069421,COCONUT=CNP0243925	0.000156098	0.000153439	0.000166393	0.000308697	0.000194073	0.000186177	0.000690348	0.000329431	0.000324169	0.00139295	0.00013536	0.000305894	0.000243275	0.000254443	0.000255335	0.000271775	0.000271769	0.00021775	0.000195269	0.000345229	0.000440072	0.000310904	8.16072e-05
541	neg_441	Double ID	Other possible annotated peaks for this cluster.	3	neg	441	1.495	233.104	[M-H]-	generic	C11H14N4O2	UNPD203266	6.7916	6.7916	Unknown	3	31	233.104	[M-H]-	234.112	0.0002992	3.96	Alpha amino acids and derivatives	VFDJEJCELMPUBS-FVZQZIOWNA-N	O=C1NC(C(=O)NC1=CC=2N=CNC2)C(C)C	UNPD=UNPD203266;UNPD204050;UNPD226794,NPA=NPA006809;NPA020151,COCONUT=CNP0214410	0.00107448	0.00109456	0.00113623	0.000685434	0.000641797	0	0.00132926	0.00104002	0.00113755	0.00156867	0.00128791	0.00134691	0.000801347	0.000501264	0.000556364	0.00061632	0.0004134	0.000410916	0.000497051	0	0.00121961	0.000744967	0.000470635
542	pos_1877	Simple ID	Other possible annotated peaks for this cluster.	2	pos	1877	1.599	235.119	[M+H]+	generic	C11H14N4O2	UNPD203266	6.3161	6.3161	Unknown	3	47	235.119	[M+H]+	234.112	-0.0002479	3.781	Alpha amino acids and derivatives	VFDJEJCELMPUBS-FVZQZIOWNA-N	O=C1NC(C(=O)NC1=CC=2N=CNC2)C(C)C	UNPD=UNPD203266;UNPD204050;UNPD226794,NPA=NPA006809;NPA020151,COCONUT=CNP0214410	0	0	0	0	0	0	0	0	0	0	0	0	0	0	0	0.00595197	0	0	0	0.00908396	0.00915566	0.00651901	0.00164045
543	pos_2325	Unknown compound		1	pos	2325	10.779	257.165	[2M+H]+																		0.000151565	0.000159036	0.000158993	0.000164421	0.000195029	0.000184151	0.000148095	0.000153325	0.000158083	0.000242017	0.000261201	0.000223623	0.000158188	0.000175497	0.000167883	0.00017648	0	0	0	0.000429153	0.000421076	0.000350278	7.19726e-05
544	pos_234	Simple ID		1	pos	234	2.04	127.05	[M+H]+	generic	C5H6N2O2	Thymine	6.1273	6.1273	Unknown	3	20	127.05	[M+H]+	126.043	0.0005039	3.115	Hydroxypyrimidines	RWQNBRDOKXIBIV-UHFFFAOYSA-N	O=C1NC=C(C(=O)N1)C	HMDB=HMDB0000262,KNApSAcK=C00001511,ChEBI=CHEBI:17821,DrugBank=DB03462,SMPDB=PW_C000179,YMDB=YMDB00885,FooDB=FDB021922,NANPDB=NANPDB_2985,STOFF=STOFF_618,BMDB=BMDB00262,Urine=HMDB0000262,Saliva=HMDB0000262,Feces=HMDB0000262,ECMDB=ECMDB00262,CSF=HMDB0000262,Serum=HMDB0000262,PubChem=1135,PlantCyc=THYMINE,UNPD=UNPD144240,BLEXP=BLEXPDB00000001135,COCONUT=CNP0143365	0.0001946	0.000180628	0.00024066	0.000101274	8.14242e-05	0.000106437	0.000479751	0.000356482	0.000389121	0.000330232	0.000439754	0.00115958	0.000278735	0.000316403	0.00033204	0	0.000585525	0.000419743	0.00053323	0	0	0	0
545	pos_2341	Simple ID		1	pos	2341	16.185	257.186	[M+H]+	generic	C13H24N2O3	N-[(2R,3R,6S)-6-(2-aminoethyl)-2-(hydroxymethyl)-3-oxanyl]cyclobutanecarboxamide	6.6889	6.6889	Unknown	3	32	257.186	[M+H]+	256.179	0.0002691	3.732	C-glycosyl compounds	WTINLZZCKOEXLA-XMXUMIDENA-N	O=C(NC1CCC(OC1CO)CCN)C2CCC2	ChEBI=CHEBI:118326;CHEBI:118379;CHEBI:118463;CHEBI:118495	0	0	0	0.000535559	0.000771151	0.00072521	0	0	0	0	0	0	0.00010879	9.99051e-05	9.06224e-05	9.76334e-05	0	0	0	0	0	0	0
546	pos_235	Simple ID		1	pos	235	2.204	127.05	[M+H]+	generic	C5H6N2O2	Thymine	6.0199	6.0199	Unknown	3	29	127.05	[M+H]+	126.043	0.0005039	3.046	Hydroxypyrimidines	RWQNBRDOKXIBIV-UHFFFAOYSA-N	O=C1NC=C(C(=O)N1)C	HMDB=HMDB0000262,KNApSAcK=C00001511,ChEBI=CHEBI:17821,DrugBank=DB03462,SMPDB=PW_C000179,YMDB=YMDB00885,FooDB=FDB021922,NANPDB=NANPDB_2985,STOFF=STOFF_618,BMDB=BMDB00262,Urine=HMDB0000262,Saliva=HMDB0000262,Feces=HMDB0000262,ECMDB=ECMDB00262,CSF=HMDB0000262,Serum=HMDB0000262,PubChem=1135,PlantCyc=THYMINE,UNPD=UNPD144240,BLEXP=BLEXPDB00000001135,COCONUT=CNP0143365	0	0	0	0	0	0	0	0	0	0	0	0	0	0	0	0.000363698	0	0	0	0.000579954	0.000762997	0.000765814	0
547	pos_2356	Simple ID		1	pos	2356	15.763	258.169	[M+H]+	generic	C13H23NO4	2-Hexenoylcarnitine	5.6648	5.6648	Unknown	3	50	258.169	[M+H]+	257.163	0.0010847	3.428	Acyl carnitines	JUAQYRSUSCWTQK-BQYQJAHWNA-N	O=C(OC(CC(=O)[O-])C[N+](C)(C)C)C=CCCC	HMDB=HMDB0013161,ChEBI=CHEBI:88762,FooDB=FDB029316,LipidMAPS=LMFA07070031,Urine=HMDB0013161,Serum=HMDB0013161,BLEXP=BLEXPDB00053481638;BLEXPDB00053974623,COCONUT=CNP0367558	0	0	0	0.00022983	0.000269246	0.000233295	0	0	0	0	0	0	0	0	6.65399e-05	6.81632e-05	0.000117596	0.00014795	0.000131336	0	0	0	0
548	pos_2358	Simple ID		1	pos	2358	13.358	258.169	[M+H]+	generic	C13H23NO4	2-Hexenoylcarnitine	6.5562	6.5562	Unknown	3	34	258.169	[M+H]+	257.163	0.0009847	3.97	Acyl carnitines	JUAQYRSUSCWTQK-BQYQJAHWNA-N	O=C(OC(CC(=O)[O-])C[N+](C)(C)C)C=CCCC	HMDB=HMDB0013161,ChEBI=CHEBI:88762,FooDB=FDB029316,LipidMAPS=LMFA07070031,Urine=HMDB0013161,Serum=HMDB0013161,BLEXP=BLEXPDB00053481638;BLEXPDB00053974623,COCONUT=CNP0367558	0	0	0	0.000352756	0.000275538	0.000274349	0	0	0	0	0	0	0.000504227	0.000500632	0.000485834	0.000511076	0.00327524	0.00290224	0.00326239	0	0	0	0
549	pos_2359	Simple ID		1	pos	2359	16.187	258.169	[M+H]+	generic	C13H23NO4	N-[2,3-dihydroxy-4-(methoxymethyl)cyclopentyl]cyclopentanecarboxamide	6.2034	6.2034	Unknown	3	48	258.169	[M+H]+	257.163	0.0009847	3.923	Cyclopentanols	SLXQGWGTNARBLQ-UHFFFAOYSA-N	O=C(NC1CC(COC)C(O)C1O)C2CCCC2	COCONUT=CNP0094510	0	0	0	0.000459244	0.0006392	0.000542425	0	0	0.000137716	0	0	0	0.000152401	0.000140084	0.000125781	0.00013346	0.000149072	0.000122407	0.000169842	0	0	0	0
550	pos_2362	Simple ID		1	pos	2362	17.277	258.206	[M+H]+	generic	C14H27NO3	N-Lauroylglycine	4.6021	4.6021	Unknown	3	49	258.206	[M+H]+	257.199	0.0003702	2.746	N-acyl-alpha amino acids	JWGGSJFIGIGFSQ-UHFFFAOYSA-N	O=C(O)CNC(=O)CCCCCCCCCCC	HMDB=HMDB0013272,ChEBI=CHEBI:74441,FooDB=FDB029361,COCONUT=CNP0001599	0	0	0	0	0	0	0	0.000193019	0.000270097	0	0	0	0	7.43888e-05	8.17295e-05	0	0.000193543	0.000125266	0.00014732	0	0	0	0
551	pos_2368	Simple ID		1	pos	2368	23.026	258.242	[M+H]+	generic	C15H31NO2	UNPD14237	7.4296	7.4296	Unknown	3	31	258.242	[M+H]+	257.235	0.0009557	4.576	Acetamides	PRFSPTJBPXYTAI-UYWMCZCJNA-N	O=C(NC(C)C(O)CCCCCCCC(C)C)C	UNPD=UNPD14237,COCONUT=CNP0260117	0	0	0	0.000448543	0.000764855	0.000558625	0	0	0	0	0	0	0.000221679	0.000203441	0.000192807	0.000213126	0.000871929	0.000904874	0.00107816	0	0	0	0
552	pos_2372	Unknown compound		1	pos	2372	14.843	259.106	[M+H]+																		0.000350668	0.000366117	0.000374837	7.92722e-05	7.65717e-05	7.69704e-05	0.000281765	0.00027161	0.000273214	0.000279876	0.000294613	0.00027662	0.000151223	0.00015083	0.000152485	0.00016598	0.00011801	8.70322e-05	0.000123006	0.000216468	0.000254129	0.000227108	0
553	pos_2376	Simple ID		1	pos	2376	8.049	259.115	[M+Na]+	generic	C10H20O6	C00050882	4.6233	4.6233	Unknown	3	32	259.115	[M+Na]+	236.126	-9.09e-05	2.86	O-glycosyl compounds	MJQQYLKJAGVSNG-IWPYZRQSNA-N	OCC1OC(OCC(C)C)C(O)C(O)C1O	KNApSAcK=C00050882,UNPD=UNPD196730,COCONUT=CNP0180838	0	0	0	0	0	0.000421732	0	0	0	0	0	0	0	0.000460979	0.000486879	0.000461717	0.000557468	0.000438461	0.000460228	0	0	0	0.000101925
554	pos_2377	Simple ID		1	pos	2377	17.242	259.122	[M+H]+	generic	C18H14N2	Marinoquinoline C	4.4922	4.4922	Unknown	3	51	259.122	[M+H]+	258.116	0.0007749	2.55	Pyrroloquinolines	PWTJJPSHOLKBPE-UHFFFAOYSA-N	N=1C=2C=CC=CC2C=3C=CNC3C1CC=4C=CC=CC4	ChEBI=CHEBI:67841,NPA=NPA019854,COCONUT=CNP0353225	9.81163e-05	0.000118096	0.000114436	0	0	0	0	0	0	9.18026e-05	9.9314e-05	8.44022e-05	5.29529e-05	0	0	0	6.8881e-05	0	5.19375e-05	0	8.69655e-05	8.04056e-05	0
555	pos_2381	Simple ID		1	pos	2381	12.721	259.144	[M+H]+	generic	C15H18N2O2	CNP0434893	6.786	6.786	Unknown	3	68	259.144	[M+H]+	258.137	0.0006043	3.943	Coumarins and derivatives	IWNUVOZPGFTFBW-UHFFFAOYSA-N	O=C1OC=2C=CC=CC2C(N)=C1CN3CCCCC3	COCONUT=CNP0434893	0.000215483	0.000209574	0.000228123	0.000113002	0.000107123	0.000108953	0.000270601	0.000215982	0.000243055	0.00023228	0.00026062	0.000233554	0.000145226	0.000146851	0.000150435	0.000144787	0.000107113	9.3635e-05	0.000116763	0.000238019	0.000281845	0.000250095	3.17714e-05
556	pos_2384	Simple ID		1	pos	2384	7.066	259.144	[M+H]+	generic	C15H18N2O2	6beta-HYdroxyhuperzine A	7.1258	7.1258	Unknown	3	62	259.144	[M+H]+	258.137	0.0004043	3.96	Quinolones and derivatives	WFICABZBCMBKJQ-KLKZSEOANA-N	O=C1C=CC2=C(N1)C(O)C3C=C(C)CC2(N)C3=CC	KNApSAcK=C00027768;C00027769,UNPD=UNPD105853;UNPD15516,COCONUT=CNP0218316	0	0	0.000138346	7.99909e-05	7.77029e-05	8.04528e-05	0.000197581	0.000174994	0.000202368	0.000159139	0.00015245	0.000135481	9.79772e-05	0.000116758	0.000116623	0	8.80167e-05	7.70344e-05	9.81348e-05	0	0	0	4.10135e-05
557	pos_2385	Simple ID		1	pos	2385	7.161	259.144	[M+H]+	generic	C15H18N2O2	6beta-HYdroxyhuperzine A	7.152	7.152	Unknown	3	67	259.144	[M+H]+	258.137	0.0003043	3.997	Quinolones and derivatives	WFICABZBCMBKJQ-KLKZSEOANA-N	O=C1C=CC2=C(N1)C(O)C3C=C(C)CC2(N)C3=CC	KNApSAcK=C00027768;C00027769,UNPD=UNPD105853;UNPD15516,COCONUT=CNP0218316	0	0	0	0	0	0	0	0	0	0	0	0	0	0	0	0.000124862	0	0	0	0.000224398	0.000209425	0.000195844	0
558	pos_2413	Simple ID		1	pos	2413	10.076	261.087	[M+H]+	generic	C13H12N2O4	1-[2-(2H-1,3-benzodioxol-5-yl)-1-hydroxy-4-methyl-1H-imidazol-5-yl]ethan-1-one	5.5126	5.5126	Unknown	3	33	261.087	[M+H]+	260.08	0.0001833	3.347	Benzodioxoles	OLRAEOMDHLXEII-UHFFFAOYSA-N	O=C(C1=C(N=C(C=2C=CC=3OCOC3C2)N1O)C)C	COCONUT=CNP0140697	7.98011e-05	0	8.48583e-05	0	0	0	0.000233888	0.000189937	0.000226488	0	6.88862e-05	0.000116052	0	6.99662e-05	7.78883e-05	8.791e-05	5.48455e-05	4.98166e-05	6.35017e-05	9.65537e-05	0.000140718	7.98106e-05	0
559	pos_2417	Simple ID		1	pos	2417	11.241	261.123	[M+H]+	generic	C14H16N2O3	Maculosin;L-Proline-L-tyrosine anhydride;Cyclo(L-tyrosyl-L-proline)	7.2835	7.2835	Unknown	3	45	261.123	[M+H]+	260.116	0.0005688	4.008	Alpha amino acids and derivatives	LSGOTAXPWMCUCK-XXCBQWOANA-N	O=C1NC(C(=O)N2CCCC12)CC3=CC=C(O)C=C3	KNApSAcK=C00002350;C00030074,ChEBI=CHEBI:6631,DrugBank=DB04520,NANPDB=NANPDB_4079,UNPD=UNPD149749;UNPD23657;UNPD55885;UNPD81035,NPA=NPA000159;NPA003847;NPA007345,COCONUT=CNP0320469	0.00228929	0.00211858	0.00255593	0.00159911	0.00146282	0.0016718	0.0052263	0.00456912	0.00514407	0.00186852	0.00277898	0.00240516	0.00193596	0.00230789	0.00252066	0.00246235	0.00231179	0.00189107	0.00244859	0.00355551	0.0036427	0.00305807	0.000383107
560	pos_2418	Simple ID		1	pos	2418	9.496	261.123	[M+H]+	generic	C14H16N2O3	Maculosin;L-Proline-L-tyrosine anhydride;Cyclo(L-tyrosyl-L-proline)	8.0675	8.0675	Unknown	3	33	261.123	[M+H]+	260.116	0.0005688	4.21	Alpha amino acids and derivatives	LSGOTAXPWMCUCK-XXCBQWOANA-N	O=C1NC(C(=O)N2CCCC12)CC3=CC=C(O)C=C3	KNApSAcK=C00002350;C00030074,ChEBI=CHEBI:6631,DrugBank=DB04520,NANPDB=NANPDB_4079,UNPD=UNPD149749;UNPD23657;UNPD55885;UNPD81035,NPA=NPA000159;NPA003847;NPA007345,COCONUT=CNP0320469	0.0105577	0.0101909	0.0104082	0.00599764	0.00557468	0.00605706	0.0120198	0	0.0111611	0.00886209	0.0119801	0.0103965	0.00755933	0.00890692	0.00813249	0.00900083	0.00747627	0.00597137	0.00759581	0.0123259	0.0133856	0.0112362	0.00272625
561	pos_2420	Simple ID		1	pos	2420	10.785	261.123	[M+H]+	generic	C14H16N2O3	Maculosin;L-Proline-L-tyrosine anhydride;Cyclo(L-tyrosyl-L-proline)	7.6171	7.6171	Unknown	3	27	261.123	[M+H]+	260.116	0.0003688	4.343	Alpha amino acids and derivatives	LSGOTAXPWMCUCK-XXCBQWOANA-N	O=C1NC(C(=O)N2CCCC12)CC3=CC=C(O)C=C3	KNApSAcK=C00002350;C00030074,ChEBI=CHEBI:6631,DrugBank=DB04520,NANPDB=NANPDB_4079,UNPD=UNPD149749;UNPD23657;UNPD55885;UNPD81035,NPA=NPA000159;NPA003847;NPA007345,COCONUT=CNP0320469	0.00320473	0.0029571	0.00327522	0.0011187	0.00109003	0.00119904	0.00242068	0.00204587	0.00215163	0.00256465	0.00345311	0.00298658	0.00176662	0.00203988	0.00213703	0.00207762	0.00190396	0.0015438	0.00184768	0.00337609	0.003304	0.00271083	0.000395271
562	pos_2424	Simple ID	Other possible annotated peaks for this cluster.	8	pos	2424	23.127	261.148	[M+H]+	generic	C16H20O3	10-Hydroxy-3-methoxy-1,3,5,7-cadinatetraen-9-one	7.4103	7.4103	Unknown	3	61	261.148	[M+H]+	260.141	0.000621	4.031	Sesquiterpenoids	VMEKKHYIQYOLHA-UHFFFAOYNA-N	O=C1C=C(C=2C=C(C(OC)=CC2C1(O)C)C)C(C)C	HMDB=HMDB0036456,KNApSAcK=C00003158,ChEBI=CHEBI:6348,FooDB=FDB015345,UNPD=UNPD10338;UNPD78316,COCONUT=CNP0205980	0.00343047	0.00299841	0.00344194	0	0	0	0.00455683	0.00330089	0.00354865	0	0	0	0.000878226	0.000808964	0.00073352	0.00080037	0	0	0	0	0	0	0
563	pos_2427	Simple ID		1	pos	2427	16.331	261.159	[M+H]+	generic	C15H20N2O2	Baptifoline	7.6936	7.6936	Unknown	3	21	261.159	[M+H]+	260.152	0.0008543	4.396	Anagyrine-type alkaloids	AOOCSKCGZYCEJX-UHFFFAOYNA-N	O=C1C=CC=C2N1CC3CC2CN4CCC(O)CC43	HMDB=HMDB0033481,KNApSAcK=C00002212;C00007722;C00007723;C00026270;C00026324,ChEBI=CHEBI:2990,FooDB=FDB011525,UNPD=UNPD127433;UNPD143534;UNPD159553;UNPD169970;UNPD84810;UNPD95791,COCONUT=CNP0211933	0.000737386	0.000688328	0.000685552	0.000321532	0.0003188	0.000320829	0.000930434	0.000750626	0.000802083	0.000655557	0.000623907	0.000591532	0.000478321	0.000511737	0.000465362	0.000506614	0.00040685	0.000344115	0.00039225	0.000736686	0.000794653	0.000804357	0.000154205
564	pos_2428	Simple ID		1	pos	2428	16.532	261.159	[M+H]+	generic	C15H20N2O2	Baptifoline	7.6402	7.6402	Unknown	3	38	261.159	[M+H]+	260.152	0.0008543	4.338	Anagyrine-type alkaloids	AOOCSKCGZYCEJX-UHFFFAOYNA-N	O=C1C=CC=C2N1CC3CC2CN4CCC(O)CC43	HMDB=HMDB0033481,KNApSAcK=C00002212;C00007722;C00007723;C00026270;C00026324,ChEBI=CHEBI:2990,FooDB=FDB011525,UNPD=UNPD127433;UNPD143534;UNPD159553;UNPD169970;UNPD84810;UNPD95791,COCONUT=CNP0211933	0.000605338	0.000623183	0.000591576	0.000316923	0.00029537	0.000315323	0.000751786	0.000688353	0.000692129	0.000580302	0.000560844	0.000512248	0.000445989	0.000422618	0.000410859	0.000432542	0.000329337	0.000289755	0.000337532	0.000611108	0.000683625	0.000654264	0.000149693
565	pos_2436	Simple ID		1	pos	2436	10.563	261.217	[M+H]+	generic	C13H28N2O3	Elaiomycin F	5.3643	5.3643	Unknown	3	27	261.217	[M+H]+	260.21	0.0001692	3.568	Azoxy compounds	WGHHPQYWXONJQE-ULNCKAKWSA-N	[O-][N+](=NC(COC)C(O)C)CCCCCCCC	NPA=NPA011788,COCONUT=CNP0283634	0	0	0	0.00249382	0.00223909	0.0022586	0	0	0	0	0	0	0.000389014	0.000400099	0.000387358	0.00041536	0.000296352	0.000303375	0.000349942	0	0	0	0
566	pos_2442	Simple ID		1	pos	2442	17.264	262.053	[M+H]+	generic	C13H11NO3S	4-(1,3-benzoxazol-2-ylsulfanyl)but-2-yn-1-yl acetate	4.8298	4.8298	Unknown	3	39	262.053	[M+H]+	261.046	0.0004407	2.951	Benzoxazoles	XFHZQJNRZJJGHT-UHFFFAOYSA-N	O=C(OCC#CCSC1=NC=2C=CC=CC2O1)C	COCONUT=CNP0038802	0	0	0	0	0	0	0	0	0	0.000145122	0.000100331	0.00013103	5.86728e-05	5.5726e-05	0	0	0.000207869	0.0001013	0.00021229	0	9.89876e-05	0.000116644	0
567	pos_2448	Double ID		2	pos	2448	12.318	262.164	[M+H]+	generic	C12H23NO5	UNPD128184	7.0677	7.0677	Unknown	3	35	262.164	[M+H]+	261.158	0.0012993	3.973	Pyrrolizidines	AITZGXDKERIISX-RLLBSPEJNA-N	OCC1N2C(CCC(O)C)CC(O)C2C(O)C1O	UNPD=UNPD128184,COCONUT=CNP0294506	0	0	0	0	0	0	0	0	0	0	0	0	0.000530412	0.000529354	0.000512124	0.000595545	0.00352499	0.00449165	0.00357476	0	0	0	0
568	pos_2449	Simple ID		1	pos	2449	12.735	262.164	[M+H]+	generic	C12H23NO5	UNPD128184	6.9415	6.9415	Unknown	3	37	262.164	[M+H]+	261.158	0.0011993	3.852	Pyrrolizidines	AITZGXDKERIISX-RLLBSPEJNA-N	OCC1N2C(CCC(O)C)CC(O)C2C(O)C1O	UNPD=UNPD128184,COCONUT=CNP0294506	0	0	0	0	0	0	0	0	0	0	0	0	8.44691e-05	9.59129e-05	9.30689e-05	0.00012092	0.00060192	0.000857599	0.000682657	0	0	0	0
569	pos_2458	Unknown compound		1	pos	2458	11.592	263.069	[M+H]+																		0	8.19211e-05	9.51914e-05	0	0	0	0	0.000166885	0.000161661	0	0	0	0	6.61378e-05	0	6.40268e-05	0.000166275	5.84173e-05	0.000155505	0	0	0	0
570	pos_2461	Simple ID		1	pos	2461	14.191	263.08	[M+H]+	generic	C16H10N2O2	Styelsamine C	4.793	4.793	Unknown	3	27	263.08	[M+H]+	262.074	0.001304	2.847	Pyrido[2,3,4-kl]acridines	YKIJUADOHYRDSQ-UHFFFAOYSA-N	O=CC1=CC(O)=C2N=CC=C3C=4C=CC=CC4NC1=C23	KNApSAcK=C00029061,UNPD=UNPD72220,COCONUT=CNP0313640	0.00024532	0.000251005	0.00024964	4.71024e-05	3.96914e-05	0	0	0	0	0.000182136	0.000190885	0.000201921	8.46244e-05	7.14273e-05	5.94735e-05	6.89648e-05	0	3.95206e-05	0	0	0	0	0
571	pos_2493	Simple ID		1	pos	2493	12.787	264.113	[M+H]+	generic	C16H13N3O	6-(4-morpholinyl)naphthalene-2,3-dicarbonitrile	4.6101	4.6101	Unknown	3	52	264.113	[M+H]+	263.106	0.0002385	3.003	Naphthalenes	MNPHKJOTGDBSIR-UHFFFAOYSA-N	N#CC1=CC2=CC=C(C=C2C=C1C#N)N3CCOCC3	ChEBI=CHEBI:94269	0.000593585	0.000564464	0.000613912	0.000307044	0.000306584	0.000310082	0.000560123	0.00054838	0.000709035	0.000503214	0.000572947	0.000554408	0.000324252	0.000353163	0.000379955	0.000414108	0.000349248	0.000288591	0.000363942	0.00043464	0.00038239	0.000268728	0
572	pos_2029	Simple ID	Other possible annotated peaks for this cluster.	2	pos	2029	14.689	243.087	[M+H]+	generic	C12H10N4O2	Lumichrome	6.3134	6.3134	Unknown	3	28	243.087	[M+H]+	242.08	0.001152	3.487	Flavins	ZJTJUVIJVLLGSP-UHFFFAOYSA-N	O=C1N=C2NC=3C=C(C(=CC3N=C2C(=O)N1)C)C	KNApSAcK=C00030694,ChEBI=CHEBI:17781;CHEBI:37323,DrugBank=DB04345,PubChem=5326566,UNPD=UNPD93871,BLEXP=BLEXPDB00005326566,COCONUT=CNP0210205	0.00976031	0.00900461	0.0101407	0.0078591	0.00760108	0.00801869	0.0128128	0.0123389	0.0120191	0.00920954	0.0111466	0.00972179	0.00754452	0.00758663	0.00715077	0.0079689	0.00755059	0.00505273	0.00726381	0.0120132	0.0144544	0.0117698	0.00172905
573	pos_253	Simple ID		1	pos	253	15.356	128.07	[M+H]+	generic	C6H9NO2	N-ethylsuccinimide	5.3975	5.3975	Unknown	3	12	128.07	[M+H]+	127.063	0.000605	2.822	N-substituted carboxylic acid imides	GHAZCVNUKKZTLG-UHFFFAOYSA-N	O=C1N(C(=O)CC1)CC	ChEBI=CHEBI:44348,DrugBank=DB01902,ECMDB=ECMDB20521,PubChem=16842,UNPD=UNPD6133,COCONUT=CNP0304586	0.000381787	0.000379745	0.000337512	0.00022601	0.000213957	0.000231945	0.000713096	0.000640083	0.000696605	0.000368441	0.000364746	0.000322007	0.000282817	0.000260228	0.000263836	0.000262755	0.000223392	0.000197376	0.000235801	0.000281813	0.000297791	0.00027717	0
574	pos_2060	Simple ID		2	pos	2060	12.233	244.153	[M+H]+	generic	C12H21NO4	3-hydroxy-N-[(3S)-2-ketotetrahydrofuran-3-yl]caprylamide	6.8727	6.8727	Unknown	3	22	244.153	[M+H]+	243.147	0.0010346	3.895	N-acyl-alpha amino acids and derivatives	XCZVBYOXRSFQBH-AXDSSHIGSA-N	O=C(NC1C(=O)OCC1)CC(O)CCCCC	PubChem=66769741,UNPD=UNPD164673,COCONUT=CNP0183092	0	0	0	0.00330741	0.0040517	0.00434287	0	0	0	0	0	0	0.000543938	0.000620422	0.000591445	0.000619996	0	0	0	0	0	0	0
575	pos_2566	Unknown compound		1	pos	2566	0.932	267.145	[2M+H]+																		0.000975814	0.000839814	0.000872676	0	0	0	0.000599735	0.000567757	0.000449949	0.000641013	0.000847002	0.000799789	0.000601679	0.000615477	0.000577824	0.000610645	0.000644571	0.000516665	0.000724413	0.000906639	0.000947236	0.00106383	0.00012949
576	pos_2567	Simple ID		1	pos	2567	1.893	267.145	[M+H]+	generic	C12H18N4O3	4'-Deaza-1'-Aza-2'-Deoxy-1'-(9-Methylene)-Immucillin-H, (3r,4r)-N-[9-Deazahypoxanthin-9-Yl)Methyl]-4-Hydroxymethyl-Pyrrolidin-3-Ol	6.3652	6.3652	Unknown	3	42	267.145	[M+H]+	266.138	-0.0002331	3.745	Alpha amino acids and derivatives	WFVGWLHAOKEIOJ-VPOLOUISSA-N	O=C1NC=NC2C(=CNC12)CN3CC(O)C(CO)C3	DrugBank=DB03551	0	0	0	0	0	0	0	0	0	0	0	0	0	0	0	0.000160441	0	0	0	0.000332409	0.000239292	0.000236363	7.90266e-05
577	pos_2594	Unknown compound		1	pos	2594	15.383	268.151	[M+H]+																		0	0	0	0.000993639	0.000796461	0.000749963	0	0	0	0	0	0	0.000121453	0.000129168	0.000121688	0.000123667	0	0	0	0	0	0	0
578	pos_261	Simple ID		1	pos	261	6.208	130.032	[M+H]+	generic	C5H7NOS	Goitrin	5.0969	5.0969	Unknown	3	14	130.032	[M+H]+	129.025	0.0005113	3.04	Oxazolidines	UZQVYLOFLQICCT-BYPYZUCNSA-N	S=C1OC(C=C)CN1	ChEBI=CHEBI:80751,NANPDB=NANPDB_1424;NANPDB_1425,UNPD=UNPD122257;UNPD53044,BLEXP=BLEXPDB00003034683,COCONUT=CNP0252373	0.000238401	0.000234762	0.000253865	9.95045e-05	8.9886e-05	9.28998e-05	0.000279946	0.000249633	0.000252767	0.000296373	0.00027917	0.00024022	0.000170703	0.000177635	0.000180372	0	0.00018415	0.000138918	0.000184168	0	0	0	0
579	pos_262	Simple ID		1	pos	262	6.383	130.032	[M+H]+	generic	C5H7NOS	Goitrin	6.0603	6.0603	Unknown	3	23	130.032	[M+H]+	129.025	1.13e-05	3.558	Oxazolidines	UZQVYLOFLQICCT-BYPYZUCNSA-N	S=C1OC(C=C)CN1	ChEBI=CHEBI:80751,NANPDB=NANPDB_1424;NANPDB_1425,UNPD=UNPD122257;UNPD53044,BLEXP=BLEXPDB00003034683,COCONUT=CNP0252373	0	0	0	0	0	0	0	0	0	0	0	0	0	0	0	0.000196009	0	0	0	0.000428273	0.000444758	0.00046135	0
580	pos_2631	Simple ID		1	pos	2631	14.023	270.087	[M+H]+	generic	C14H11N3O3	Dichotomide IX	6.4618	6.4618	Unknown	3	42	270.087	[M+H]+	269.08	0.0001177	3.852	Harmala alkaloids	SHWLACKWPMLEKI-UHFFFAOYSA-N	O=C(N)C=1N=C(C(=O)C)C=2NC=3C=CC=CC3C2C1O	ChEBI=CHEBI:70217,UNPD=UNPD193966,COCONUT=CNP0181227	0.000157571	0.000149912	0.000157127	4.65052e-05	5.30656e-05	4.27651e-05	0.000129408	0.000108973	0.00012405	0.000137176	0.000113315	0.000100631	8.06155e-05	7.72849e-05	6.11885e-05	7.64947e-05	7.29856e-05	4.90484e-05	7.68786e-05	0	9.61126e-05	7.7815e-05	0
581	pos_2651	Simple ID		1	pos	2651	9.31	271.107	[M+H]+	generic	C15H14N2O3	Limazepine D	5.6158	5.6158	Unknown	3	62	271.106	[M+H]+	270.1	0.0012188	3.251	1,4-benzodiazepines	SKMAAAVNEKWJHB-UHFFFAOYSA-N	O=C1C=2C=CC(OC)=C(O)C2N=CC3=CC(=CN13)CC	KNApSAcK=C00047497,UNPD=UNPD17295,NPA=NPA012119,COCONUT=CNP0159386	0.00017191	0.00018136	0.000185297	9.04142e-05	0.000104635	0	0.000230858	0.000207946	0.000212733	0.000175759	0	0.000155584	0	0.000119021	0.000128934	0.000134015	0	0	0	0.000235884	0.00024912	0.000244694	0
582	pos_3198	Unknown compound		3	pos	3198	18.176	293.182	[M+Na]+																		0	0	0	0.000600714	0.000749787	0.000794177	0	0	0	0	0	0	8.442e-05	9.46488e-05	9.19778e-05	9.00506e-05	0	0	0	0	0	0	0
583	pos_2688	Unknown compound		1	pos	2688	14.018	272.184	[M+H]+																		0	0	0	0	0	0	0	0	0	0	0	0	7.50995e-05	6.78131e-05	0	6.45845e-05	0.000368726	0.000401311	0.000397566	0	0	0	0
584	pos_2690	Simple ID		1	pos	2690	18.249	272.184	[M+H]+	generic	C14H25NO4	UNPD63196	6.3407	6.3407	Unknown	3	45	272.184	[M+H]+	271.178	0.0012347	3.705	N-acyl-alpha amino acids and derivatives	DOICJCCMIBBSOO-XXCBQWOANA-N	O=C(NC1C(=O)OCC1)CC(O)CCCCCCC	UNPD=UNPD63196,COCONUT=CNP0306064	0	0	0	0.00180652	0.00242547	0.00204932	0	0	0	0	0	0	0.000352865	0.00032806	0.000317255	0	0	0	0	0	0	0	0
585	pos_2714	Simple ID		1	pos	2714	17.362	273.159	[M+H]+	generic	C16H20N2O2	4-(3-methylbut-2-enyl)-L-tryptophan	6.0636	6.0636	Unknown	3	44	273.159	[M+H]+	272.152	0.0010543	3.38	Indolyl carboxylic acids and derivatives	MZSPRSJAOSKAAT-ZDUSSCGKSA-N	O=C(O)C(N)CC1=CNC2=CC=CC(=C21)CC=C(C)C	ChEBI=CHEBI:17619;CHEBI:58209,PubChem=25200966,UNPD=UNPD122680,BLEXP=BLEXPDB00000440903,COCONUT=CNP0131192	0	0	0	0.000171424	0.000165596	0.000189027	0	0	0	0	0	0	0.00011699	0.000116098	0.000106349	0	0.000591922	0.000385074	0.000604535	0	0	0	0
586	pos_2198	Simple ID		2	pos	2198	12.817	251.185	[M+H]+	generic	C12H26O5	caredulis, 1-{1-[2-(2 hydroxypropoxy) propoxy] propan-2-yloxy} propan-2-ol	5.0582	5.0582	Unknown	3	48	251.185	[M+H]+	250.178	0.0007004	2.829	Secondary alcohols	QREZHESEHKUGLT-UHFFFAOYSA-N	OC(C)COC(C)COCC(OCC(O)C)C	NANPDB=NANPDB_408,COCONUT=CNP0075509	0	5.34514e-05	5.06344e-05	0	4.35362e-05	0	0	0.000150636	0.000304151	5.91308e-05	0	0	9.00165e-05	9.19764e-05	7.03031e-05	8.78563e-05	0.000129609	0.000139025	0.000190241	0	0	0	0
587	pos_2722	Simple ID		3	pos	2722	21.362	273.184	[2M+H]+	generic	C9H12O	2-Isopropylphenol	5.4064	5.4064	Unknown	3	89	273.184	[2M+H]+	136.089	0.0002289	3.057	Cumenes	CRBJBYGJVIBWIY-UHFFFAOYSA-N	OC=1C=CC=CC1C(C)C	HMDB=HMDB0032029,ChEBI=CHEBI:38506,T3DB=T3D3945,FooDB=FDB008729,PubChem=6943,UNPD=UNPD170388,BLEXP=BLEXPDB00000006943,COCONUT=CNP0332801	0.000870339	0.000830582	0.000948918	0	0	0	0.000886846	0.000603194	0.000700514	0	0	0	0.00020493	0.000175585	0.000184165	0.000193238	0	0	0	0	0	0	0
588	pos_2740	Simple ID		1	pos	2740	18.235	275.049	[M+H]+	generic	C13H10N2O3S	7-methoxy-N-(1,3-thiazol-2-yl)-1-benzofuran-2-carboxamide	5.3944	5.3944	Unknown	3	24	275.049	[M+H]+	274.041	-0.0001104	3.649	Benzofurans	ZSOGPZUYLRAYRS-UHFFFAOYSA-N	O=C(NC1=NC=CS1)C=2OC=3C(OC)=CC=CC3C2	COCONUT=CNP0065790	0.000114341	0.000112557	0.000113447	0	3.24336e-05	0	0.000158013	0.000126702	0.000130851	6.14335e-05	0	0	0.000107577	9.95425e-05	9.04652e-05	9.56843e-05	5.28854e-05	3.89249e-05	5.23316e-05	0.000117906	0.000135261	0.000102565	0.000101471
589	pos_2742	Simple ID		1	pos	2742	13.399	275.105	[M+H]+	generic	C11H18N2O4S	3-(2-aminoethylthio)-6-(1-hydroxyethyl)-7-keto-1-azabicyclo[3.2.0]heptane-2-carboxylic acid	6.6001	6.6001	Unknown	3	58	275.105	[M+H]+	274.099	0.0008045	3.774	Thienamycins	DMEPNWQBJCSHJH-UHFFFAOYSA-N	O=C(O)C1N2C(=O)C(C(O)C)C2CC1SCCN	PubChem=92042763,COCONUT=CNP0209534	7.21019e-05	6.08272e-05	7.28134e-05	0.000131621	0.000195567	0.000177653	0.000448778	0.000333708	0.000348278	9.6558e-05	0.000111595	0.000135626	8.51759e-05	7.62837e-05	8.70699e-05	8.76081e-05	0.000151827	9.90124e-05	0.000148301	0.00014278	0.00016611	0.000132711	0
590	pos_2750	Simple ID		1	pos	2750	11.048	275.138	[M+H]+	generic	C15H18N2O3	N-(indole-3-acetyl)valine	5.286	5.286	Unknown	3	41	275.139	[M+H]+	274.132	0.0005189	3.097	Valine and derivatives	AZEGJHGXTSUPPG-UHFFFAOYNA-N	O=C(O)C(NC(=O)CC1=CNC=2C=CC=CC21)C(C)C	ChEBI=CHEBI:133561,DrugBank=DB07953,FooDB=FDB030934,PlantCyc=CPD-9577,COCONUT=CNP0373371	0.000905291	0.000901638	0.000985003	0.000309612	0.000316026	0.000304174	0.000641097	0.000562694	0.000563933	0.00105908	0.00110184	0.00102283	0.000539405	0.000581494	0.000589444	0.000613321	0.000497113	0.000400418	0.000509801	0.00101107	0.00107403	0.000998811	0.00013701
591	pos_2760	Unknown compound		1	pos	2760	15.29	275.195	[M+H]+																		0.000580466	0.000499234	0.000388333	0	0	0	0	0	0	0	0	0	5.38736e-05	0	0	0	0	0	0	0	0	0	0
592	neg_781	Simple ID		2	neg	781	15.654	273.181	[M-H]-	generic	C13H26N2O4	Elaiomycin G	7.0011	7.0011	Unknown	3	24	273.181	[M-H]-	274.189	0.0005809	3.898	Azoxy compounds	AGSWTKCQYPFPKZ-ULNCKAKWSA-N	O=C(C)CCCCCC[N+]([O-])=NC(COC)C(O)C	NPA=NPA018210,COCONUT=CNP0351704	0.00812889	0.00675811	0.00647509	0	0	0	0	0	0	0	0	0	0.000814837	0.000858065	0.000886886	0.000840462	0	0	0	0	0	0	0
593	pos_2762	Simple ID		1	pos	2762	12.64	275.195	[M+H]+	generic	C13H26N2O4	Valinoctin A	5.5034	5.5034	Unknown	3	35	275.195	[M+H]+	274.189	0.0012338	3.224	Hybrid peptides	OQQQLESSZVHSFL-VWYCJHECSA-N	O=C(O)C(NC(=O)C(O)C(N)CCCCC)C(C)C	NPA=NPA018073,COCONUT=CNP0240697	0	0	0	0	0	0	0	0	0	0	0	0	0.000125417	0.00012464	0.000125293	0.000123904	0.000720434	0.000767276	0.000702311	0	0	0	0
594	pos_2763	Simple ID		1	pos	2763	11.328	275.195	[M+H]+	generic	C13H26N2O4	Valinoctin A	6.3797	6.3797	Unknown	3	40	275.195	[M+H]+	274.189	0.0012338	3.567	Hybrid peptides	OQQQLESSZVHSFL-VWYCJHECSA-N	O=C(O)C(NC(=O)C(O)C(N)CCCCC)C(C)C	NPA=NPA018073,COCONUT=CNP0240697	0	0	0	0	0	0	0	0	0	0	0	0	0	0.00012103	0	0.000136762	0.000725032	0.000602613	0.00089113	0	0	0	0
595	pos_2765	Unknown compound		1	pos	2765	21.58	275.199	[M+H]+																		0.000166985	0.00015842	0.000171346	0	3.6273e-05	4.52239e-05	0	0.000107489	0	5.71487e-05	0	0	8.40784e-05	8.03408e-05	6.87893e-05	7.1233e-05	0.000134374	0.000101442	0.000142663	0	0	8.81868e-05	0
596	pos_2768	Simple ID	Other possible annotated peaks for this cluster.	2	pos	2768	17.006	276.032	[M+H]+	generic	C13H9NO4S	7,8-dihydroxy-3-(2-methyl-1,3-thiazol-4-yl)-4H-chromen-4-one	7.3197	7.3197	Unknown	3	21	276.032	[M+H]+	275.025	0.0002052	4.398	Chromones	VMVYMIWOVFQGAH-UHFFFAOYSA-N	O=C1C(=COC2=C(O)C(O)=CC=C12)C=3N=C(SC3)C	COCONUT=CNP0359394	0	0	0	5.75754e-05	4.91968e-05	5.45596e-05	0	7.606e-05	0	0.000348185	0.000306748	0.000256971	7.58993e-05	6.95925e-05	6.49407e-05	6.97943e-05	7.0204e-05	4.12379e-05	5.71706e-05	0.000165951	0.000303355	0.000238005	0
597	pos_2771	Unknown compound		1	pos	2771	8.95	276.133	[M+H]+																		0.000505654	0.000522284	0.000514915	0.000328075	0.000310636	0.000311259	0.000709673	0.000639027	0.000680632	0.000493724	0.000555906	0.000480955	0.000387926	0.000417858	0.000411755	0.000447176	0.00037135	0.000282027	0.000372693	0.000641531	0.000638209	0.000586603	0.000144588
598	pos_2773	Simple ID		1	pos	2773	0.929	276.142	[M+H]+	generic	C16H21NOS	UNPD217338	4.4127	4.4127	Unknown	3	55	276.142	[M+H]+	275.134	-0.0006383	2.584	N-acyl amines	CDHCPJUXYQLWFD-IZMYCKBJSA-N	O=C(C=CC=CC=CC=1SC=CC1)NCCC(C)C	UNPD=UNPD217338,COCONUT=CNP0169315	0	0	0	7.71621e-05	0	5.04581e-05	0.00057978	0.000541093	0.000504468	0.000168577	0	0.000317241	0.000223083	0.000212768	0.000231768	0.000232629	0.00027502	0.000212152	0.000257516	0.000326153	0.000350197	0.000273936	0
599	pos_2803	Simple ID		1	pos	2803	11.174	277.154	[M+H]+	generic	C15H20N2O3	UNPD171211	7.0425	7.0425	Unknown	3	48	277.154	[M+H]+	276.147	0.000669	3.898	1-hydroxy-2-unsubstituted benzenoids	GENSLUDVKWKQMX-NVHKGDCHNA-N	O=C1NC(C(=O)NC1CC2=CC=C(O)C=C2)CC(C)C	UNPD=UNPD171211;UNPD186946,NPA=NPA015329,COCONUT=CNP0131591	0	0.000211293	0.000245963	0.00014621	0.000125218	0.000148682	0.000422902	0.000366861	0.000391936	0.00022378	0.00029808	0.000256339	0.000176726	0.000227492	0.000222463	0.000243631	0.000211224	0.000163064	0.000196401	0.000410358	0.000424155	0.000393459	0
600	pos_2804	Simple ID		1	pos	2804	12.121	277.154	[M+H]+	generic	C15H20N2O3	9-(2-methoxyethyl)-12-methyl-2-oxa-9,12-diazatricyclo[9.2.1.0?,?]tetradeca-3,5,7-trien-10-one	7.213	7.213	Unknown	3	32	277.154	[M+H]+	276.147	0.000669	4.053	Alpha amino acids and derivatives	PHRFXSSBZJZJND-UHFFFAOYSA-N	O=C1N(C=2C=CC=CC2OC3CN(C)C1C3)CCOC	COCONUT=CNP0185350	0	0	0	0.000159531	0.000156517	0.000150035	0	0	0	0	0.000370138	0	0	0.000232256	0.000257669	0.000231302	0.000181336	0.000131989	0.000168305	0	0	0	0
601	pos_2805	Simple ID		1	pos	2805	14.084	277.154	[M+H]+	generic	C15H20N2O3	UNPD62295	6.8887	6.8887	Unknown	3	18	277.154	[M+H]+	276.147	0.000269	4.39	Quinazolines	MAZXYFMVLOYDAE-SVGMAFHSNA-N	O=C1NC2=C(C(=O)C(C(=O)C2(C)C)(C)C)C3N1CCC3	UNPD=UNPD62295,COCONUT=CNP0155692	0.000279286	0.000260059	0.00027997	6.53289e-05	7.58474e-05	7.38701e-05	0.000187877	0.000188169	0.000191025	0	0	0	0.000110915	0.000107741	0.000108669	0.000111454	0	0	0	0.000170995	0.000215212	0.000193013	0
602	pos_2809	Simple ID		1	pos	2809	22.221	277.177	[M+Na]+	generic	C15H26O3	(3beta,9beta)-7-Drimene-3,11,12-triol	6.2676	6.2676	Unknown	3	56	277.178	[M+Na]+	254.188	-8.46e-05	3.52	Cyclic alcohols and derivatives	FLJVCTAWIDPKTG-UHFFFAOYNA-N	OCC1=CCC2C(C)(C)C(O)CCC2(C)C1CO	HMDB=HMDB0036053,KNApSAcK=C00020279,FooDB=FDB014875,UNPD=UNPD109966,NPA=NPA004965,COCONUT=CNP0270073	0	0	0	0	0	0	0	0.000447509	0.000669581	0	0	0	0.000158575	0.000165518	0.000164662	0.000172558	0.000278239	0.000150351	0.0001959	0	0	0	0
603	pos_2834	Simple ID		1	pos	2834	13.411	279.12	[M+H]+	generic	C11H14N6O3	2-[2-amino-6-(morpholin-4-yl)-9H-purin-9-yl]acetic acid	5.6466	5.6466	Unknown	3	55	279.12	[M+H]+	278.113	0.0001148	3.289	6-alkylaminopurines	HCBPWHUCHNAJIW-UHFFFAOYSA-N	O=C(O)CN1C=NC=2C1=NC(=NC2N3CCOCC3)N	COCONUT=CNP0412488	0	0	0	0	0	0	0	0	0.00017254	0	0	0	0	5.84662e-05	0	0	0.000100514	0	0	0	0	0	0
604	pos_2838	Simple ID		1	pos	2838	10.212	279.134	[M+H]+	generic	C14H18N2O4	N1-(alpha-D-ribosyl)-5,6-dimethyl-benzimidazole	6.7911	6.7911	Unknown	3	21	279.134	[M+H]+	278.127	3.35e-05	3.986	Benzimidazole ribonucleosides and ribonucleotides	HLRUKOJSWOKCPP-RYSNWHEDSA-N	OCC1OC(N2C=NC=3C=C(C(=CC32)C)C)C(O)C1O	HMDB=HMDB0011112,ChEBI=CHEBI:10329,FooDB=FDB027894,BMDB=BMDB11112,ECMDB=ECMDB11112,PubChem=440780;160433,UNPD=UNPD84167,COCONUT=CNP0322514	0.00411744	0.00408397	0.00463154	0.000712025	0.000745247	0.000731426	0.00624465	0.00564462	0.00533502	0.000742445	0.000743787	0.000724893	0.00301515	0.00317094	0.0031765	0.00328268	0.00180207	0.00153417	0.00157612	0.000709187	0.000859621	0.000412586	0.000892278
605	pos_2848	Simple ID		1	pos	2848	14.686	279.168	[M+Na]+	generic	C13H24N2O3	2-{3-[2-(morpholin-4-yl)ethyl]piperidin-4-yl}acetic acid	5.7782	5.7782	Unknown	3	41	279.168	[M+Na]+	256.179	0.0004133	3.446	Delta amino acids and derivatives	YRIQQLGDQQAISC-UHFFFAOYSA-N	O=C(O)CC1CCNCC1CCN2CCOCC2	COCONUT=CNP0010515	0	0	0	0	0	0	0	0	0	0.000269042	0.000204549	0.000161913	8.34601e-05	9.10855e-05	8.75501e-05	9.7034e-05	0.000297782	0.000285822	0.000228863	0	0	0	0
606	neg_1116	Simple ID		3	neg	1116	15.163	301.176	[M+FA-H]-	generic	C13H24N2O3	N-[(2R,3R,6S)-6-(2-aminoethyl)-2-(hydroxymethyl)-3-oxanyl]cyclobutanecarboxamide	6.476	6.476	Unknown	3	23	301.176	[M+FA-H]-	256.179	0.0010952	3.662	C-glycosyl compounds	WTINLZZCKOEXLA-XMXUMIDENA-N	O=C(NC1CCC(OC1CO)CCN)C2CCC2	ChEBI=CHEBI:118326;CHEBI:118379;CHEBI:118463;CHEBI:118495	0	0	0	0	0	0	0	0	0	0	0	0	0.00102343	0.00101316	0.00106344	0.00106167	0.00438463	0.00372996	0.00392148	0	0	0	0
607	pos_2914	Simple ID		1	pos	2914	30.8	282.135	[M+2H]2+	generic	C34H34N4O4	Protoporphyrin IX	5.032	5.032	Unknown	3	36	282.135	[M+2H]2+	562.258	0.0021585	2.832	Porphyrins	KSFOVUSSGSKXFI-UJJXFSCMSA-N	O=C(O)CCC=1C=2N=C(C=C3NC(=CC4=NC(=CC=5NC(C2)=C(C5C)CCC(=O)O)C(C=C)=C4C)C(C=C)=C3C)C1C	HMDB=HMDB0000241,KNApSAcK=C00007370,ChEBI=CHEBI:15430;CHEBI:57306,SMPDB=PW_C000163,YMDB=YMDB00055,T3DB=T3D4440,BMDB=BMDB00241,ECMDB=ECMDB00241,Serum=HMDB0000241,PlantCyc=PROTOPORPHYRIN_IX,UNPD=UNPD16629,COCONUT=CNP0252744	0	0	0	0	0	0	0	0	0	9.20941e-05	0	0	0.000104487	0.000106551	0.000110575	0.000121855	0	3.77678e-05	0	0.000175731	0.000251629	0.00245087	0
608	pos_2403	Double ID	Other possible annotated peaks for this cluster.	9	pos	2403	17.356	260.185	[M+H]+	generic	C13H25NO4	Hexanoylcarnitine	7.6905	7.6905	Unknown	3	27	260.185	[M+H]+	259.178	0.0005347	4.649	Acyl carnitines	VVPRQWTYSNDTEA-UHFFFAOYNA-N	O=C([O-])CC(OC(=O)CCCCC)C[N+](C)(C)C	HMDB=HMDB0000705;HMDB0000756,ChEBI=CHEBI:70749;CHEBI:84834,FooDB=FDB022192;FDB022226,BMDB=BMDB00705;BMDB00756,LipidMAPS=LMFA07070001;LMFA07070070,Urine=HMDB0000756,Feces=HMDB0000705,Serum=HMDB0000705;HMDB0000756,BLEXP=BLEXPDB00006426853;BLEXPDB00003082079,COCONUT=CNP0082632	0	4.4561e-05	0	0.0490419	0.0467394	0.0477808	0	0.000269644	0	0	0	0	0.0148564	0.0147177	0.0134943	0.0152414	0.00336587	0.00344151	0.00382538	0	0	0	0
609	pos_2925	Simple ID		1	pos	2925	31.478	282.279	[M+H]+	generic	C18H35NO	Oleamide	7.1058	7.1058	Unknown	3	61	282.279	[M+H]+	281.272	0.0005412	3.935	Fatty amides	FATBGEAMYMYZAF-KTKRTIGZSA-N	O=C(N)CCCCCCCC=CCCCCCCCC	HMDB=HMDB0002117,ChEBI=CHEBI:116314,DrugBank=DB03784,FooDB=FDB012436,STOFF=STOFF_8473,BMDB=BMDB02117,LipidMAPS=LMFA08010004;LMFA08010011,Serum=HMDB0002117,UNPD=UNPD56520,BLEXP=BLEXPDB00000001930,COCONUT=CNP0300480	6.56574e-05	6.46131e-05	5.59727e-05	0.000419672	0.00025468	0.000231941	0.000384446	0.000139049	0.000318365	0.000300536	6.38499e-05	0.000278872	0.000145739	0.000130074	0.000136403	0.000145297	0.000142573	9.23902e-05	7.49946e-05	0.000119683	0.000255361	0.000127888	2.45182e-05
610	neg_643	Double ID		2	neg	643	14.498	259.154	[M-H]-	generic	C13H24O5	UNPD199691	6.3417	6.3417	Unknown	3	35	259.154	[M-H]-	260.162	0.0007974	3.333	Sesquiterpenoids	SKVQCSCQLUQDGI-QUMBEOJWNA-N	OCC(O)C=CC1(O)C(O)(C)CC(O)CC1(C)C	UNPD=UNPD199691,COCONUT=CNP0417556	0.00841145	0.00756	0.00825147	0	0	0	0.00540003	0.00424818	0.00434202	0	0	0	0.00212623	0.00184314	0.00194477	0.00199799	0	0	0	0	0	0	0
611	neg_887	Double ID	Other possible annotated peaks for this cluster.	3	neg	887	15.949	281.139	[M-H]-	generic	C15H22O5	Bisbynin	7.9235	7.9235	Unknown	3	34	281.139	[M-H]-	282.147	4.74e-05	4.434	Pyrans	ICHJNTDKHBXTFN-UHFFFAOYNA-N	OC1C2=C(COC1C)C(O)C3(OC3C2O)CC=C(C)C	HMDB=HMDB0041324,FooDB=FDB021244,UNPD=UNPD20337;UNPD65499,NPA=NPA012672,COCONUT=CNP0132142	0.00695393	0.00526528	0.00563783	0	0	0	0.0106435	0.00949027	0.00998053	0	0	0	0.00282757	0.00269577	0.00274057	0.00268519	0	0	0	0	0	0	0
612	pos_2941	Unknown compound		1	pos	2941	9.736	283.173	[M+H]+																		7.10657e-05	6.0751e-05	7.34299e-05	5.32952e-05	6.08028e-05	5.25539e-05	9.75825e-05	9.85899e-05	0.000125812	8.70669e-05	0.000100511	9.10496e-05	8.79035e-05	9.99714e-05	9.65198e-05	9.36332e-05	0.000120551	0.00017749	0.000290898	0.000123363	0.000154742	0.000133358	2.54968e-05
613	pos_2954	Unknown compound		1	pos	2954	20.404	284.101	[M+H]+																		0.000178337	0.000196254	0.000199015	0	3.99008e-05	0	0.000150914	0.000150728	0.000163065	9.27799e-05	7.46089e-05	0.000121937	0.000102139	8.35262e-05	7.66919e-05	9.54384e-05	0.000121929	7.37315e-05	0.000123266	9.21987e-05	0.000152407	0.000105736	0
614	pos_2958	Unknown compound		4	pos	2958	13.907	284.138	[M+H]+																		0.00241427	0.0022461	0.00252097	0.00163021	0.00145741	0.00141923	0.0040613	0.00337333	0.00371439	0.00240823	0.0026301	0.0024813	0.00181231	0.00189817	0.00184634	0.00190344	0.00182752	0.00147183	0.00169483	0.00286756	0.00322857	0.00294165	0.000428216
615	pos_2974	Unknown compound		1	pos	2974	8.733	284.205	[M+H]+																		0	0	5.27482e-05	6.16201e-05	5.48821e-05	5.89574e-05	0.000117221	0.000128377	0.000178598	0	0	0	7.52994e-05	0.000112613	0.000119058	0.000115099	0.000161904	0.000194182	0.000410141	0.000135982	0.000114534	0.000145017	2.95936e-05
616	pos_2982	Simple ID		1	pos	2982	35.827	284.331	[M+H]+	generic	C19H41N	nonadecan-2-amine	4.5776	4.5776	Unknown	3	16	284.331	[M+H]+	283.324	7.68e-05	2.659		CRTBHHWJNLQHEB-UHFFFAOYSA-N	NC(C)CCCCCCCCCCCCCCCCC	COCONUT=CNP0076433	0	0	0	0	5.95423e-05	0	0	0	0.000166652	0	0	0	0	0.000127915	0.000149023	0.00015409	0.000132405	9.48042e-05	0.000135653	0.000232359	0.000188935	0.000170083	6.18611e-05
617	pos_3001	Double ID		2	pos	3001	16.095	285.18	[M+H]+	generic	C14H24N2O4	oseltamivir acid	6.2142	6.2142	Unknown	3	31	285.18	[M+H]+	284.174	0.0013837	3.474	Gamma amino acids and derivatives	NENPYTRHICXVCS-YNEHKIRRSA-N	O=C(O)C1=CC(OC(CC)CC)C(NC(=O)C)C(N)C1	ChEBI=CHEBI:73139,DrugBank=DB02600,STOFF=STOFF_3720,BLEXP=BLEXPDB00000449381	0.00180719	0.00189642	0.00204347	0	0	0	0	0	0	0	0	0	0.000185941	0.000171562	0.000159595	0.000173541	0	0	0	0	0	0	0
618	pos_3027	Simple ID	Other possible annotated peaks for this cluster.	2	pos	3027	14.537	286.154	[M+H]+	generic	C16H19N3O2	D-Valyl-L-tryptophan aldehyde	6.7458	6.7458	Unknown	3	45	286.154	[M+H]+	285.148	0.0009033	3.681	Alpha amino acids and derivatives	WNWCQIPRIITCPM-UHFFFAOYNA-N	O=C1NC(C(=O)NC1CC2=CNC=3C=CC=CC32)C(C)C	KNApSAcK=C00011261,UNPD=UNPD40250,NPA=NPA005796,COCONUT=CNP0202401	0	0	0.000195211	0	0	0	0.000262018	0.00021391	0.000224733	0.000190569	0.000205367	0.000189309	0.000131739	0.000118448	0.00013015	0.000141563	0	0	8.17123e-05	0.000200093	0.000219487	0.0002166	2.33657e-05
619	pos_3032	Unknown compound		2	pos	3032	19.601	286.199	[M+H]+																		0	0	0	0.000708703	0.000859255	0.000745635	0	0	0	0	0	0	0.000125963	0.000116667	0.000110729	0.000112441	0	0	0	0	0	0	0
620	pos_3064	Double ID		2	pos	3064	15.794	287.196	[M+H]+	generic	C14H26N2O4	N-Acetyl-leucyl-leucine	6.1599	6.1599	Unknown	3	46	287.196	[M+H]+	286.189	0.0008338	3.896	Dipeptides	SQGBTKIDTKOYMS-UHFFFAOYNA-N	O=C(NC(C(=O)NC(C(=O)O)CC(C)C)CC(C)C)C	ChEBI=CHEBI:7193,UNPD=UNPD190058,COCONUT=CNP0141641	0.0037899	0.00358436	0.00327991	0	0	0	0	0	0	0	0	0	0.000326318	0.000323872	0.000303737	0.000323488	0	0	0	0	0	0	0
621	pos_3065	Double ID		2	pos	3065	17.699	287.196	[M+H]+	generic	C14H26N2O4	N-Acetyl-leucyl-leucine	6.1201	6.1201	Unknown	3	35	287.196	[M+H]+	286.189	0.0007338	3.678	Dipeptides	SQGBTKIDTKOYMS-UHFFFAOYNA-N	O=C(NC(C(=O)NC(C(=O)O)CC(C)C)CC(C)C)C	ChEBI=CHEBI:7193,UNPD=UNPD190058,COCONUT=CNP0141641	0.00506105	0.00572482	0.00521852	0	0	0	0	0	0	0	0	0	0.000502227	0.000464659	0.000421519	0.000464311	0	0	0	0	0	0	0
622	pos_3076	Unknown compound		1	pos	3076	9.713	288.133	[M+H]+																		0	0	0	9.72959e-05	0.000116905	9.70574e-05	0.000378044	0.000368867	0.000358993	0	0	0	0.000108825	0	0.000117136	0.000120255	0.000115664	7.32831e-05	0.000110395	0	0	0	0
623	pos_3091	Double ID		2	pos	3091	20.597	288.216	[M+H]+	generic	C15H29NO4	2-amino-3-(dodecanoyloxy)propanoic acid	7.7306	7.7306	Unknown	3	17	288.216	[M+H]+	287.21	0.0007349	4.877	Alpha amino acids	IGZVVOAVTPZMEP-UHFFFAOYSA-N	O=C(OCC(N)C(=O)O)CCCCCCCCCCC	COCONUT=CNP0401399	0	0	0	0.00386691	0.00446827	0.00405869	0	0	0	0	0	0	0.000649073	0.00059009	0.000557324	0.000616645	0.000197426	0.00018257	0.000215535	0	0	0	0
624	pos_3096	Unknown compound		1	pos	3096	12.873	288.677	[M+2H]2+																		0	0	0	0	0	0	0	0	0	0	0	0	0.000552188	0.000476668	0.000571432	0.000462842	0	0	0	0	0	0	0
625	pos_312	Simple ID		1	pos	312	8.048	132.138	[M+H]+	generic	C7H17NO	2-ethyl-4-(methylamino)butan-1-ol	4.7099	4.7099	Unknown	3	15	132.138	[M+H]+	131.131	0.0004906	2.769	Dialkylamines	SEQRMDBRYIGQDX-UHFFFAOYSA-N	OCC(CC)CCNC	COCONUT=CNP0141963	0	0	0	0	0	0	0.00411675	0.00322643	0.00492304	0	0	0	0	0	0.000944749	0.0010038	0.000148481	0	0.000148242	0.000130853	0.000144047	0	0
626	pos_3127	Simple ID	Other possible annotated peaks for this cluster.	2	pos	3127	17.887	290.047	[M+H]+	generic	C14H11NO4S	7,8-dihydroxy-2-methyl-3-(2-methyl-1,3-thiazol-4-yl)-4H-chromen-4-one	5.358	5.358	Unknown	3	44	290.047	[M+H]+	289.041	0.0007553	3.28	Chromones	AOCKFCNJNJXNEF-UHFFFAOYSA-N	O=C1C2=CC=C(O)C(O)=C2OC(=C1C=3N=C(SC3)C)C	COCONUT=CNP0252196	0.000404684	0.000469904	0.000475973	0.000684593	0.000713535	0.000629125	0.00147422	0.00134596	0.00129449	0.00149505	0.00118868	0.00102748	0.000636163	0.000607584	0.000600292	0.000641956	0.0011147	0.00101708	0.00107267	0.000752484	0.00111036	0.000706907	0
627	pos_313	Simple ID		1	pos	313	7.974	132.138	[M+H]+	generic	C7H17NO	3-(tert-butoxy)propan-1-amine	4.6523	4.6523	Unknown	3	26	132.138	[M+H]+	131.131	0.0003906	2.64	Dialkyl ethers	BZCSKDXOXIUCSS-UHFFFAOYSA-N	O(CCCN)C(C)(C)C	COCONUT=CNP0186216	0.00111797	0.000932152	0.00107669	0	0	0	0	0	0	0	0	0	0.000787283	0.000918324	0	0	0	8.27151e-05	0	0	0	0.000140437	0
628	pos_3145	Simple ID		1	pos	3145	9.876	291.134	[M+H]+	generic	C15H18N2O4	Limazepine B1	6.312	6.312	Unknown	3	63	291.134	[M+H]+	290.127	0.0001335	3.621	1,4-benzodiazepines	YKBYRAOPZZWMOE-MOVNSBPVNA-N	O=C1C2=CC=C(OC)C(O)=C2NC(O)C3N1C=C(CC)C3	KNApSAcK=C00047494;C00047495,NPA=NPA004459;NPA015928,COCONUT=CNP0117910	0	0	0.000230817	0	0	0	0	0	0	0	0	0	0	9.3838e-05	9.87427e-05	0.000105133	5.62031e-05	0	0	0.000194869	0.000194601	0.000135117	0
629	pos_3147	Simple ID		1	pos	3147	25.879	291.14	[M+2H]2+	generic	C29H36N6O7	5-(carbamoylamino)-2-{2-[2-(2,4-dioxo-1,2,3,4-tetrahydroquinazolin-3-yl)-3-phenylpropanamido]-3-methylpentanamido}pentanoic acid	4.4955	4.4955	Unknown	3	41	291.14	[M+2H]2+	580.265	-0.0016996	2.821	Peptides	JRIRYTIZEVHCKZ-UHFFFAOYSA-N	O=C(N)NCCCC(NC(=O)C(NC(=O)C(N1C(=O)NC=2C=CC=CC2C1=O)CC=3C=CC=CC3)C(C)CC)C(=O)O	COCONUT=CNP0390623	0	0	0	0	0	0	0	0	0	0.000173637	0	0	8.98249e-05	7.77155e-05	8.36131e-05	7.44191e-05	0	0	0	0.000114034	0.000141706	0.00217984	0
630	pos_3154	Simple ID		1	pos	3154	14.348	291.17	[M+H]+	generic	C16H22N2O3	Procaterol	6.5111	6.5111	Unknown	3	53	291.17	[M+H]+	290.163	-8.1e-05	3.9	Hydroquinolones	FKNXQNWAXFXVNW-BLLLJJGKSA-N	O=C1C=CC=2C(N1)=C(O)C=CC2C(O)C(NC(C)C)CC	HMDB=HMDB0015453,ChEBI=CHEBI:91585;CHEBI:135209,DrugBank=DB01366,Urine=HMDB0015453,Serum=HMDB0015453,BLEXP=BLEXPDB00000004916,COCONUT=CNP0334777	0.000220001	0.000225505	0.00021421	6.18298e-05	6.35188e-05	6.37866e-05	0.000210567	0.000178554	0.000185021	0.000156698	0.000146976	0.000142566	0.000103712	8.48665e-05	8.95026e-05	0.000101741	7.78512e-05	4.73533e-05	7.44783e-05	0.000162345	0.000179749	0.000161284	0
631	pos_3169	Unknown compound		1	pos	3169	0.934	292.165	[M+Na]+																		0.000819539	0.000923251	0.000712118	0.000393211	0.00039362	0.000292377	0.000275589	0.000240131	0.000292484	0.000666915	0.000815629	0.000555772	0.000292189	0.000266868	0.000251568	0.000251878	0.000174529	0.00014578	0.000227619	0.000104939	0.000215879	0.000293989	7.59873e-05
632	pos_3170	Simple ID		1	pos	3170	2.443	292.165	[M+H]+	generic	C15H21N3O3	Eseridine	7.5809	7.5809	Unknown	3	30	292.165	[M+H]+	291.158	0.000668	4.738	Indoles and derivatives	CNBHDDBNEKKMJH-DDOUFSBJNA-N	O=C(OC1=CC=C2C(=C1)C3(C)CCN(OC3N2C)C)NC	KNApSAcK=C00001726,ChEBI=CHEBI:4855,UNPD=UNPD78432,COCONUT=CNP0318280	0.000280415	0.00027655	0.000310415	0.000153261	0.000154754	0.000148083	0.000425379	0.00036028	0.000429494	0.000316228	0.000319113	0.000326066	0.000204661	0.000225283	0.000240839	0	0.000213222	0.000185683	0.000224607	0	0	0	0
633	pos_3171	Simple ID		1	pos	3171	2.644	292.165	[M+H]+	generic	C15H21N3O3	Eseridine	7.4542	7.4542	Unknown	3	25	292.165	[M+H]+	291.158	0.000568	4.598	Indoles and derivatives	CNBHDDBNEKKMJH-DDOUFSBJNA-N	O=C(OC1=CC=C2C(=C1)C3(C)CCN(OC3N2C)C)NC	KNApSAcK=C00001726,ChEBI=CHEBI:4855,UNPD=UNPD78432,COCONUT=CNP0318280	0	0	0	0	0	0	0	0	0	0	0	0	0	0	0	0.00025794	0	0	0	0.000387513	0.000373881	0.000313137	4.0697e-05
634	pos_2677	Simple ID		2	pos	2677	16.635	271.202	[M+H]+	generic	C14H26N2O3	2-(3-{2-[2-(hydroxymethyl)pyrrolidin-1-yl]ethyl}piperidin-4-yl)acetic acid	4.629	4.629	Unknown	3	32	271.202	[M+H]+	270.194	-0.0001809	2.904	Delta amino acids and derivatives	KKBAXHLQHDWMPD-UHFFFAOYSA-N	O=C(O)CC1CCNCC1CCN2CCCC2CO	COCONUT=CNP0213649	0	0	0	0	0	0	0	0	0	0	0	0	0.000130961	0.000114004	0.000122085	0.000117204	0.000655629	0.000802798	0.000754272	0	0	0	0
635	pos_3208	Simple ID		1	pos	3208	8.259	294.118	[M+H]+	generic	C11H19NO8	UNPD190163	5.5076	5.5076	Unknown	3	40	294.118	[M+H]+	293.111	0.000343	3.408	Acylaminosugars	CPRBVTZNVRIVGJ-JHFKAIIZNA-N	O=C(O)C(OC1C(O)C(NC(=O)C)C(O)OC1CO)C	UNPD=UNPD190163,COCONUT=CNP0141564	0.000264772	0.000260916	0.000321641	0	0	0	0.00129904	0.000568132	0.00066939	0.00234452	0.00122847	0.000637108	0.000206436	0.000204772	0.000205446	0.000224118	0	0	0	0	0	0	0
636	pos_321	Simple ID		1	pos	321	11.868	134.06	[M+H]+	generic	C8H7NO	(??)-2-Hydroxy-2-phenylacetonitrile	4.8814	4.8814	Unknown	3	18	134.06	[M+H]+	133.053	0.0004403	2.514	Benzene and substituted derivatives	NNICRUQPODTGRU-UHFFFAOYNA-N	N#CC(O)C=1C=CC=CC1	HMDB=HMDB0034666;HMDB0060486,KNApSAcK=C00051456,ChEBI=CHEBI:16910;CHEBI:36941;CHEBI:18450,DrugBank=DB04737,YMDB=YMDB01642,T3DB=T3D1686,FooDB=FDB013191;FDB013525,PubChem=9548674,PlantCyc=CPD-12702,UNPD=UNPD154810;UNPD93197,BLEXP=BLEXPDB00000010758,COCONUT=CNP0193863	0.000143689	0.000141699	0.000152732	6.5518e-05	5.06557e-05	5.16969e-05	0.000233756	0.000211325	0.000226179	0.000135661	0.000158148	0.000148198	8.93248e-05	9.63545e-05	9.75926e-05	0.000108547	5.5305e-05	4.39403e-05	5.21826e-05	0.000161252	0.000178351	0.000142674	2.88362e-05
637	pos_3216	Unknown compound		1	pos	3216	0.834	294.165	[M+H]+																		0.000217101	0.000167766	0.000230018	9.37737e-05	8.633e-05	0.000116989	0.000449171	0.000334482	0.000264406	0.00027054	0.000289537	0.000318333	0.000144772	0.00015864	0.000169535	0.00014314	0.000144172	0.000102093	0.00014314	9.67055e-05	0.000184465	0.000113186	2.65173e-05
638	pos_3227	Simple ID		1	pos	3227	16.456	295.11	[M+H]+	generic	C14H18N2O3S	8-{[(furan-2-yl)methyl]sulfanyl}-2-methyl-octahydro-1H-pyrido[1,2-a]pyrazine-1,4-dione	5.6434	5.6434	Unknown	3	50	295.11	[M+H]+	294.104	0.0007899	3.77	Piperazinopiperidines	UOSMCKQTFKCSDW-UHFFFAOYSA-N	O=C1N2CCC(SCC=3OC=CC3)CC2C(=O)N(C)C1	COCONUT=CNP0138036	0.000216207	0.000323163	0.000357811	0.000154823	0.000198962	0.000170875	0	0.000114023	0	0	0	0	0.00010731	0.000101816	9.61107e-05	0.000101601	9.17154e-05	3.56675e-05	8.69716e-05	0.000237067	0.00046685	9.67522e-05	0
639	pos_3252	Simple ID		1	pos	3252	8.846	296.134	[M+H]+	generic	C12H17N5O4	N(6),N(6)-dimethyladenosine	7.9252	7.9252	Unknown	3	24	296.135	[M+H]+	295.128	0.0008305	4.672	Purine nucleosides	WVGPGNPCZPYCLK-WOUKDFQISA-N	OCC1OC(N2C=NC=3C2=NC=NC3N(C)C)C(O)C1O	ChEBI=CHEBI:28284,UNPD=UNPD146918;UNPD93339,BLEXP=BLEXPDB00010469765,COCONUT=CNP0275667	0.00209646	0.0020886	0.00212621	0.00231146	0.00244497	0.00239616	0.00298734	0.00279377	0.00285741	0.00505377	0.00485977	0.00495172	0.0019736	0.00201837	0.00192529	0.00209256	0.00350732	0.00274257	0.00352379	0.000343785	0.000423284	0.00219911	3.36964e-05
640	neg_1036	Double ID		3	neg	1036	6.446	296.1	[M-H]-	generic	C11H15N5O5	2-Methylguanosine	7.8916	7.8916	Unknown	3	44	296.1	[M-H]-	297.107	-5.79e-05	4.342	Purine nucleosides	SLEHROROQDYRAW-KQYNXXCUSA-N	O=C1N=C(NC2=C1N=CN2C3OC(CO)C(O)C3O)NC	HMDB=HMDB0005862,ChEBI=CHEBI:19702,FooDB=FDB023782,BMDB=BMDB05862,UNPD=UNPD145460,BLEXP=BLEXPDB00135501934,NPA=NPA012957,COCONUT=CNP0116170	0	0	0	0	0	0.000589819	0	0.00410631	0.00445765	0	0.00290899	0	0	0.00266958	0.00278529	0.00267886	0.00236161	0.00208887	0.00236787	0.004545	0	0.00468889	0
641	pos_3289	Simple ID		1	pos	3289	12.052	298.119	[M+H]+	generic	C16H15N3O3	6-(2-aminopyrimidin-4-yl)-4-ethyl-7-hydroxy-8-methyl-2H-chromen-2-one	7.1279	7.1279	Unknown	3	35	298.119	[M+H]+	297.111	-0.0004822	4.284	7-hydroxycoumarins	OYYROGJDWYYTQY-UHFFFAOYSA-N	O=C1OC2=C(C=C(C=3N=C(N=CC3)N)C(O)=C2C)C(=C1)CC	COCONUT=CNP0394497	0.00012343	0.000114682	0.000133947	9.4835e-05	0.000109139	9.02797e-05	0	0.000121816	0.000121713	0.000186589	0.000170062	0.000163785	9.1212e-05	0.000120779	9.15027e-05	0.000112894	0.000121264	7.38574e-05	8.68963e-05	0.000356929	0.000354351	0.000360801	0
642	pos_3295	Simple ID		1	pos	3295	9.285	298.176	[M+H]+	generic	C14H23N3O4	3-(5-ethyl-2,4-dioxo-1,2,3,4-tetrahydropyrimidin-1-yl)-2-[(3-methylbutyl)amino]propanoic acid	6.9955	6.9955	Unknown	3	39	298.176	[M+H]+	297.169	0.0002327	3.982	Alpha amino acids	PYLREZRKGBGNAR-UHFFFAOYSA-N	O=C1NC(=O)N(C=C1CC)CC(NCCC(C)C)C(=O)O	COCONUT=CNP0004580	0.000530086	0.000554468	0.000563715	0	0.00013959	0	0	0	0	0.000460012	0.000428564	0.000444527	0.000248917	0.000267276	0.000276513	0.000293729	0.000231702	0.000180754	0.000235726	0.000530417	0.000543265	0.000474581	0
643	pos_3306	Simple ID		1	pos	3306	9.41	299.08	[M+H]+	generic	C11H14N4O4S	UNPD226193	5.2867	5.2867	Unknown	3	34	299.08	[M+H]+	298.074	0.0003524	3.193	Thioglycosides	KHOAKFWUEHUJTA-IOSLPCCCSA-N	OC1=NC=NC2=C1N=CN2CC3OC(SC)C(O)C3O	UNPD=UNPD226193,NPA=NPA006145,COCONUT=CNP0118608	0	0	0	0.000391189	0.000345088	0.000361448	0	0	0	0	0	0	6.27039e-05	0	6.66287e-05	0	0	0	0	0	0	0	0
644	pos_331	Simple ID		1	pos	331	17.235	135.117	[M+H]+	generic	C10H14	p-Cymene	6.4251	6.4251	Unknown	3	22	135.117	[M+H]+	134.11	2.69e-05	3.312	Aromatic monoterpenoids	HFPZCAJZSCWRBC-UHFFFAOYSA-N	C=1C=C(C=CC1C)C(C)C	HMDB=HMDB0005805,KNApSAcK=C00003040,ChEBI=CHEBI:28768,T3DB=T3D4882,FooDB=FDB017358,NANPDB=NANPDB_268;NANPDB_1577;NANPDB_1654;NANPDB_4538;NANPDB_4892;NANPDB_4915;NANPDB_4924;NANPDB_5031;NANPDB_5221,STOFF=STOFF_5336,BMDB=BMDB05805,LipidMAPS=LMPR0102090014,Urine=HMDB0005805,Saliva=HMDB0005805,PubChem=7463,UNPD=UNPD1860,BLEXP=BLEXPDB00000007463,COCONUT=CNP0145577	0.00021102	0.00017794	0.000176525	0	0	0	0.000621143	0.000621308	0.000588508	0	0	0	0.00018088	0.000194854	0.000188482	0.000238135	0	0	0	0	0	0	0
645	neg_800	Double ID		2	neg	800	12.33	275.104	[M-H]-	generic	C14H16N2O4	UNPD223305	7.3176	7.3176	Unknown	3	29	275.104	[M-H]-	276.111	-6.95e-05	4.217	Alpha amino acids and derivatives	JEKJKMJDASOZRW-WOPDTQHZSA-N	O=C1NC(C(=O)N2CC(O)CC12)CC3=CC=C(O)C=C3	UNPD=UNPD223305,NPA=NPA016167;NPA016320,COCONUT=CNP0264671	0.0144627	0.0159146	0.0154699	0	0	0	0.0253867	0.0179366	0.0188438	0.0182849	0.0102522	0.0211731	0.0100218	0.00839936	0.00843432	0.00863811	0	0	0	0.0168115	0.0176371	0.0164151	0
646	pos_3339	Simple ID		1	pos	3339	15.867	300.169	[M+H]+	generic	C17H21N3O2	cyclo(D-Leu-L-Trp)	7.2386	7.2386	Unknown	3	63	300.169	[M+H]+	299.163	0.0012534	3.826	Alpha amino acids and derivatives	BZUNCDPEEKFTCX-PVRQQBJHNA-N	O=C1NC(C(=O)NC1CC2=CNC=3C=CC=CC32)CC(C)C	KNApSAcK=C00042430,UNPD=UNPD151881,NPA=NPA003641;NPA007246,COCONUT=CNP0171392	0.000339948	0.000356422	0.000348183	0.000165104	0.000162123	0.000169969	0.000493239	0.000391021	0.000393384	0.000325312	0.000355266	0.000314883	0.000240013	0.000245659	0.000231572	0.000259315	0.000174899	0.000146752	0.000173965	0.000347726	0.000388605	0.000361058	7.39541e-05
647	pos_1715	Simple ID	Other possible annotated peaks for this cluster.	2	pos	1715	15.516	227.175	[M+H]+	generic	C12H22N2O2	cyclo(L-leucyl-L-leucyl)	6.8525	6.8525	Unknown	3	31	227.175	[M+H]+	226.168	0.0004044	4.082	Alpha amino acids and derivatives	XWYXUMDVQIOAPR-WSYQHHSTNA-N	O=C1NC(C(=O)NC1CC(C)C)CC(C)C	ChEBI=CHEBI:67269,UNPD=UNPD126776,COCONUT=CNP0165802	0.00103414	0.00103241	0.00111948	0.000370925	0.000337167	0.000346264	0.00127875	0.00118693	0.00126691	0.00092329	0.000913732	0.000821157	0.000637787	0.000671692	0.000607317	0.000710935	0.000528669	0.000412361	0.000509007	0.00104613	0.00109318	0.0010038	0.000196924
648	pos_3346	Simple ID		1	pos	3346	20.736	300.216	[M+H]+	generic	C16H29NO4	CNP0445778	6.3874	6.3874	Unknown	3	40	300.216	[M+H]+	299.21	0.0004349	3.975	Sesquiterpenoids	UKFVNULWTIOPBI-UHFFFAOYSA-N	O=CNC1(C)CCC(CC1)C(O)(C=CC(O)C(O)(C)C)C	COCONUT=CNP0445778	0	0	0	0.000481439	0.000621564	0.000571042	0	0	0	0	0	0	9.11139e-05	8.35693e-05	7.66322e-05	8.7353e-05	0	0	0	0	0	0	0
649	pos_3353	Unknown compound		1	pos	3353	16.512	300.713	[M+2H]2+																		0	0	0	0.000472562	0.000286801	0.000328456	0	0	0	0	0	0	5.4703e-05	0	0	0	0	0	0	0	0	0	0
650	pos_3356	Simple ID		1	pos	3356	13.694	301.117	[M+H]+	generic	C16H16N2O4	UNPD66187	5.9229	5.9229	Unknown	3	55	301.117	[M+H]+	300.111	0.0010834	3.421	1,4-benzodiazepines	ILVPUOFERZHGNR-KIVOBAFRNA-N	O=C(O)CC(=O)C=C1NC=2C=CC=CC2C(=O)N3CCCC13	UNPD=UNPD66187,NPA=NPA003361,COCONUT=CNP0200854	0.000141645	0.000130725	0.000142186	5.91808e-05	5.52371e-05	5.84887e-05	0.000113231	0.000103375	0.000100762	0.000102492	0.000135148	0.000144685	5.96018e-05	7.03835e-05	5.755e-05	0	9.44052e-05	6.60439e-05	8.35901e-05	0.000176242	0.000187011	0.000156668	0
651	pos_3381	Simple ID		1	pos	3381	10.317	302.115	[M+H]+	generic	C15H15N3O4	UNPD216435	6.6701	6.6701	Unknown	3	63	302.115	[M+H]+	301.106	-0.0009676	3.67	Alpha amino acids and derivatives	QPYZUFUUNHUIIL-OAHLLOKOSA-N	O=C1NC(OC)(C(=O)NC1=CC2=CNC=3C=CC=CC23)CO	UNPD=UNPD216435,NPA=NPA005718,COCONUT=CNP0124798	0	0	0	6.15763e-05	0	0	0.000357625	0	0.000338737	0	0	0.000225115	0.000141119	0	0.000178444	0.000188416	0	0	0	0.000290464	0.000338858	0.000227391	0
652	pos_3390	Simple ID		2	pos	3390	17.169	302.175	[M+H]+	generic	C18H23NO3	4-ethyl-5-hydroxy-7-methyl-6-(1-piperidinylmethyl)-1-benzopyran-2-one	6.7385	6.7385	Unknown	3	21	302.175	[M+H]+	301.168	0.00057	4.07	Coumarins and derivatives	DPVJOADKPAHYPA-UHFFFAOYSA-N	O=C1OC2=CC(=C(C(O)=C2C(=C1)CC)CN3CCCCC3)C	ChEBI=CHEBI:123436	0.000566079	0.000674191	0.0006339	0.000283252	0.000244691	0.000239917	0.000392274	0.000260124	0.000220586	0.000111177	0.000106999	0	0.00024478	0.000236775	0.000215495	0.000236986	0.000259231	0.000249212	0.000183302	0.000819418	0.000484001	0.000532017	0
653	pos_3405	Unknown compound		2	pos	3405	12.335	303.177	[M+Na]+																		0	0	0	0	0	0	0	0.000297476	0.000554852	0	0	0	0.0001084	0.000104501	0.000118767	0.000108109	0.000186344	0.000165432	0.000181568	0	0	0	0
654	pos_3411	Simple ID	Other possible annotated peaks for this cluster.	2	pos	3411	21.313	303.192	[M+H]+	generic	C14H26N2O5	N-{[4-hydroxy-5-(hydroxymethyl)-3-(piperidin-1-yl)oxolan-2-yl]methyl}-2-methoxyacetamide	7.3401	7.3401	Unknown	3	21	303.192	[M+H]+	302.184	-0.0010516	4.564	C-glycosyl compounds	ALAPMADOZNTMBW-UHFFFAOYSA-N	O=C(NCC1OC(CO)C(O)C1N2CCCCC2)COC	COCONUT=CNP0012942	0.000850281	0.000763984	0.00084765	0	0	0	0.000547333	0.000300613	0.000252416	0	0	0	0.000145658	0.000136185	0.000147511	0.000161535	7.6104e-05	0.000116498	9.56506e-05	0	0	0	0
655	pos_3428	Simple ID		1	pos	3428	13.065	304.166	[M+H]+	generic	C16H21N3O3	Valyl-Tryptophan	7.8196	7.8196	Unknown	3	40	304.166	[M+H]+	303.158	-3.2e-05	4.383	Dipeptides	LZDNBBYBDGBADK-UHFFFAOYNA-N	O=C(O)C(NC(=O)C(N)C(C)C)CC1=CNC=2C=CC=CC21	HMDB=HMDB0029138,ChEBI=CHEBI:92809,UNPD=UNPD90200,BLEXP=BLEXPDB00000168182,COCONUT=CNP0326988	0	0	0	0.000472719	0.000718558	0.000631788	0	0	0	0	0	0	0.000106492	9.1132e-05	0.000104053	9.93057e-05	0	0	0	0	0	0	0
656	pos_3440	Unknown compound		1	pos	3440	27.057	304.299	[M+H]+																		0	0	0	0	0	5.39097e-05	0	0	0	0	0	0	0	0.000159719	0.000159511	0.000151409	0	0	0	0.000131649	0.000111375	0.000116954	0.000314674
657	pos_3446	Simple ID		1	pos	3446	15.472	305.123	[M+H]+	generic	C14H16N4O4	4-(5-methyl-1,2-oxazole-3-carbonyl)-6-(pyrazin-2-yloxy)-1,4-oxazepane	5.6275	5.6275	Unknown	3	41	305.123	[M+H]+	304.117	0.0014314	3.242	2-heteroaryl carboxamides	JOHMSLWWPFZKHS-UHFFFAOYSA-N	O=C(C1=NOC(=C1)C)N2CCOCC(OC3=NC=CN=C3)C2	COCONUT=CNP0005288	0.000131752	0.000127122	0.000122348	0	4.55823e-05	4.48207e-05	0.000131686	0.000111972	0.000108405	0.000137895	0.000111814	0.000105295	7.76085e-05	6.72583e-05	6.34937e-05	8.1322e-05	0	0	0	0.000115693	0.000120185	0.000125928	0
658	pos_10315	Simple ID	Other possible annotated peaks for this cluster.	2	pos	10315	25.916	609.271	[M+H]+	generic	C35H36N4O6	Harderoporphyrin	7.262	7.262	Unknown	3	39	609.27	[M+H]+	608.263	0.0002613	4.013	Porphyrins	KECOXFKVIHSIBO-UJJXFSCMSA-N	O=C(O)CCC=1C=2N=C(C=C3NC(=CC4=NC(=CC=5NC(C2)=C(C5CCC(=O)O)C)C(=C4C)CCC(=O)O)C(=C3C=C)C)C1C	HMDB=HMDB0000683,BMDB=BMDB00683,UNPD=UNPD92072,BLEXP=BLEXPDB00003081462,COCONUT=CNP0002384	0	0	0	0	0	0	0.000136038	0	0	0.000707763	0.000121349	0	0.000208246	0.00015638	0.000150623	0.000154954	0	0	0	0.000295427	0.000883121	0.00435475	0
659	pos_3457	Simple ID		1	pos	3457	10.829	305.148	[M+H]+	generic	C16H20N2O4	NSC 177499;Tomaymycin	5.6802	5.6802	Unknown	3	73	305.148	[M+H]+	304.142	0.0014836	3.243	1,4-benzodiazepines	UQVNRKBFAXNOGA-DBNUNWKMNA-N	O=C1C2=CC(OC)=C(O)C=C2NC(OC)C3N1CC(=CC)C3	KNApSAcK=C00018843,UNPD=UNPD153576;UNPD169926;UNPD208292;UNPD43929;UNPD211664;UNPD230644,NPA=NPA005351,COCONUT=CNP0282848	0.000195831	0.000198601	0.000219092	0.000161963	0.000164404	0.000168544	0.000244405	0.000210067	0.000210185	0.000216528	0.000226423	0.000211095	0.00018562	0.000183606	0.000203463	0.000206552	0.000207902	0.000163333	0.000202472	0.000415352	0.000414859	0.000398307	5.83174e-05
660	pos_3461	Simple ID	Other possible annotated peaks for this cluster.	6	pos	3461	19.522	305.171	[M+H]+	generic	C14H20N6O2	discadenine	7.5404	7.5404	Unknown	3	20	305.171	[M+H]+	304.165	0.0009503	4.185	6-alkylaminopurines	KGVAAXZLUAKZEO-JTQLQIEISA-N	O=C(O)C(N)CCN1C=NC(NCC=C(C)C)=C2N=CN=C21	ChEBI=CHEBI:15955;CHEBI:57585;CHEBI:62934,PubChem=194139,UNPD=UNPD122114,COCONUT=CNP0168055	0.00521268	0.00439485	0.00509466	0	0	0	0.00825304	0.00607494	0.00599454	0	0	0	0.00197773	0.00186521	0.00173083	0.0018745	0	0	0	0	0	0	0
661	pos_3510	Simple ID		1	pos	3510	22.992	307.224	[M+H]+	generic	C15H26N6O	N-methyl-N-[(octahydro-1H-quinolizin-1-yl)methyl]-3-(1H-1,2,3,4-tetrazol-1-yl)propanamide	4.7606	4.7606	Unknown	3	36	307.224	[M+H]+	306.217	0.0003859	3.102	Quinolizines	SCMKJFYOBCIIAO-UHFFFAOYSA-N	O=C(N(C)CC1CCCN2CCCCC21)CCN3N=NN=C3	COCONUT=CNP0361908	0	0	0	0	0	0	0	0.000324851	0.00037647	0	0	0	0.000112316	0.000119439	0.000120994	0.000120398	0.000264204	0.000108954	0.000144432	0	0	0	0
662	pos_3521	Simple ID		1	pos	3521	9.769	308.134	[M+H]+	generic	C12H21NO8	CNP0438856	5.0616	5.0616	Unknown	3	31	308.134	[M+H]+	307.127	0.0004931	3.698	Quinic acids and derivatives	MVRBVXKQSYKAGV-UHFFFAOYSA-N	O=C(O)C1(O)CC(O)C(NC(=O)C)C(C1)C(O)C(O)CO	COCONUT=CNP0438856	7.2685e-05	6.27215e-05	7.31047e-05	0	0	0	0.000178835	0	0	0.00105223	0.000673958	0.000443358	0	0	0	6.40846e-05	0	0	0	0	0	7.17551e-05	0
663	pos_3530	Simple ID		1	pos	3530	10.975	308.195	[M+H]+	generic	C16H25N3O3	methyl 5-(2,2-dimethylpropanoyl)-3-(propan-2-yl)-3H,4H,5H,6H,7H-imidazo[4,5-c]pyridine-6-carboxylate	6.0289	6.0289	Unknown	3	68	308.195	[M+H]+	307.19	0.0014681	3.464	Alpha amino acid esters	TWMUBOPGHREKSW-UHFFFAOYSA-N	O=C(OC)C1N(C(=O)C(C)(C)C)CC2=C(N=CN2C(C)C)C1	COCONUT=CNP0045101	0.000263474	0.000256413	0.000279421	0.000106705	0.000135525	0.000119696	0.000332965	0.000303557	0.000325251	0.000219927	0.000211485	0.000234411	0.000152084	0.000193413	0.00019836	0.000192873	0.000182942	0.000135609	0.000168644	0.000295513	0.000312796	0.000186554	0
664	pos_3545	Simple ID		1	pos	3545	11.943	309.144	[M+H]+	generic	C15H20N2O5	2-Carboxy-1-[5-(2-carboxy-1-pyrrolidinyl)-2-hydroxy-2,4-pentadienylidene]pyrrolidinium	5.6423	5.6423	Unknown	3	75	309.144	[M+H]+	308.137	0.0002982	3.383	Proline and derivatives	DJTFHMOANYEGKP-UHFFFAOYNA-N	O=C([O-])C1N(C=C(O)C=CC=[N+]2CCCC2C(=O)O)CCC1	HMDB=HMDB0035173,FooDB=FDB013813,COCONUT=CNP0003026	0.000154338	0.000156378	0.000171845	0	0	0	0	8.05813e-05	9.50272e-05	0.000113792	0.000143572	0.000190135	5.82091e-05	6.30129e-05	0	5.88101e-05	0	4.60098e-05	0	0.000138301	0.000124989	0.000103986	0
665	pos_3564	Simple ID		1	pos	3564	11.395	310.088	[M+H]+	generic	C10H19N3O4S2	2-[[(2R)-2-ammonio-3-[4-(methylthio)butanehydroximoylthio]propanoyl]amino]acetate	5.209	5.209	Unknown	3	77	310.088	[M+H]+	309.082	0.0013745	2.808	Peptides	CRFBBNBNLWWNBP-AXGKHFFLSA-N	O=C([O-])CNC(=O)C([NH3+])CSC(=NO)CCCSC	PubChem=90658957,PlantCyc=CPD-12391	0	0	0	0	0	0	0.000279282	0.000376715	0.000319233	4.02621e-05	7.63429e-05	0	0.000101877	0.000109557	0	0.00012572	0.000215571	9.27692e-05	0.000192929	0	0.000367749	0	0
666	pos_3566	Simple ID		1	pos	3566	11.853	310.088	[M+H]+	generic	C10H19N3O4S2	2-[[(2R)-2-ammonio-3-[4-(methylthio)butanehydroximoylthio]propanoyl]amino]acetate	5.9288	5.9288	Unknown	3	77	310.088	[M+H]+	309.082	0.0008745	3.419	Peptides	CRFBBNBNLWWNBP-AXGKHFFLSA-N	O=C([O-])CNC(=O)C([NH3+])CSC(=NO)CCCSC	PubChem=90658957,PlantCyc=CPD-12391	0	0	0	0	8.88337e-05	0.000104411	0.000170914	0.000243157	0.000198772	0	0	0	0	0	7.32426e-05	0	8.05398e-05	0	7.25747e-05	0.000222357	0.000217908	0	0
667	pos_3568	Simple ID		1	pos	3568	8.122	310.114	[M+H]+	generic	C11H19NO9	9-O-acetylneuraminic acid	6.4746	6.4746	Unknown	3	25	310.114	[M+H]+	309.106	-0.0003424	3.63	Neuraminic acids	BJOZNDRNJJZHPZ-LUWBGTNYSA-N	O=C(O)C1(O)OC(C(O)C(O)COC(=O)C)C(N)C(O)C1	ChEBI=CHEBI:28879,PubChem=440038,BLEXP=BLEXPDB00000440038,COCONUT=CNP0116799	0.000986788	0.00101085	0.00112934	0	0	0	0.00720545	0.00278258	0.00317583	0.00320502	0.00322688	0.00254902	0.00100481	0.00111578	0.00117061	0.00125761	0	0	0	0.000104145	0	0	0
668	pos_3574	Simple ID		1	pos	3574	16.692	310.165	[M+H]+	generic	C16H23NO5	UNPD38491	6.2297	6.2297	Unknown	3	56	310.165	[M+H]+	309.158	0.0001993	3.604	Alpha amino acid esters	WDIRUGQHYYJBHM-FXPQKAFVNA-N	O=C(OC)C1(NC(=O)C2CCOC21C)C(O)C3C=CCCC3	UNPD=UNPD38491,NPA=NPA016654,COCONUT=CNP0108274	0	0	0	6.98983e-05	6.87555e-05	6.3733e-05	0	0	0	0	0	0	5.33517e-05	0	0	0	9.67531e-05	0	0.000106035	0	0	8.99128e-05	0
669	pos_3589	Simple ID		1	pos	3589	13.686	311.139	[M+H]+	generic	C18H18N2O3	cyclo(L-tyrosyl-L-phenylalanyl)	7.2931	7.2931	Unknown	3	54	311.139	[M+H]+	310.132	0.0001189	4.227	Alpha amino acids and derivatives	GRWVBLRIPRGGPD-MNSHXRSINA-N	O=C1NC(C(=O)NC1CC=2C=CC=CC2)CC3=CC=C(O)C=C3	ChEBI=CHEBI:71611,UNPD=UNPD22004;UNPD33307,COCONUT=CNP0248446	0.000593757	0.000589955	0.000627279	0.000365352	0.000338163	0.000353045	0.000820723	0.000708697	0.000734006	0.000468358	0.000587375	0.000572208	0.000387084	0.000391348	0.000407334	0.000464393	0.000452392	0.000341852	0.000422672	0.000779585	0.000764559	0.00070309	6.89699e-05
670	neg_970	Simple ID	Other possible annotated peaks for this cluster.	3	neg	970	17.413	287.197	[M-H]-	generic	C14H28N2O4	Valinoctin B	5.8282	5.8282	Unknown	3	19	287.197	[M-H]-	288.205	0.0008309	3.417	Hybrid peptides	VLUDHYVPNMGNDL-WSWARRKISA-N	O=C(O)C(NC(=O)C(O)C(N)CCC(C)CC)C(C)C	NPA=NPA007934,COCONUT=CNP0351604	0.0810421	0.070513	0.0679947	0	0	0	0	0	0	0	0.000420572	0	0.0126897	0.0132119	0.0135556	0.0131284	0	0	0	0	0	0	0
671	pos_3600	Simple ID		1	pos	3600	8.197	312.129	[M+H]+	generic	C12H17N5O5	1,7-Dimethylguanosine	6.1065	6.1065	Unknown	3	35	312.129	[M+H]+	311.123	0.0010451	3.672	Purine nucleosides	AISVAXNALHBFPC-IOSLPCCCSA-N	O=C1C2=C(N=C(N)N1C)[N+](=CN2C)C3OC(CO)C(O)C3[O-]	HMDB=HMDB0001961,FooDB=FDB022767,BMDB=BMDB01961,COCONUT=CNP0204825	0.000863068	0.000890286	0.000903831	0.000476646	0.000546964	0.000467899	0.00121952	0	0.00105898	0.00114786	0.00106702	0.00106641	0.000589506	0.000638	0.000598463	0.000667244	0.000635497	0.000493313	0.000602989	0.000891779	0.000995184	0.000774345	0
672	pos_3602	Simple ID		1	pos	3602	22.658	312.134	[M+H]+	generic	C17H17N3O3	Imazaquin	7.754	7.754	Unknown	3	24	312.134	[M+H]+	311.127	0.0004679	4.495	Quinoline carboxylic acids	CABMTIJINOIHOD-UHFFFAOYNA-N	O=C(O)C=1C=C2C=CC=CC2=NC1C3=NC(C(=O)N3)(C)C(C)C	ChEBI=CHEBI:5869,DrugBank=DB04582,T3DB=T3D3863,STOFF=STOFF_3893,BLEXP=BLEXPDB00000054739,COCONUT=CNP0241358	0.000262327	0.000293292	0.000276722	4.99729e-05	4.86569e-05	6.17669e-05	0.000165011	0.000167337	0.000186137	0.000188504	0.000185033	0.000185926	0.000140009	0.000124069	0.000109996	0.000120857	0.000154011	7.53011e-05	0.000148877	0.000161233	0.00023736	0.000230825	0
673	pos_3603	Simple ID	Other possible annotated peaks for this cluster.	2	pos	3603	17.422	312.134	[M+H]+	generic	C17H17N3O3	Imazaquin	6.4617	6.4617	Unknown	3	60	312.134	[M+H]+	311.127	0.0004679	3.846	Quinoline carboxylic acids	CABMTIJINOIHOD-UHFFFAOYNA-N	O=C(O)C=1C=C2C=CC=CC2=NC1C3=NC(C(=O)N3)(C)C(C)C	ChEBI=CHEBI:5869,DrugBank=DB04582,T3DB=T3D3863,STOFF=STOFF_3893,BLEXP=BLEXPDB00000054739,COCONUT=CNP0241358	0.000526373	0.000670923	0.000541139	0.000140301	0.000157794	0.000102078	0.000899369	0.00067043	0.000734657	0.00052724	0.00044362	0.000353929	0.000344783	0.000312378	0.000266916	0.000314777	0.00014454	0.00022181	0.000177017	0.000262364	0.000372633	0.000197855	0.000438483
674	pos_3612	Simple ID		1	pos	3612	9.019	312.191	[M+H]+	generic	C15H25N3O4	2-methoxy-1-[1-(oxetan-3-yl)-hexahydro-1'H-spiro[azetidine-3,6'-pyrazino[2,1-c][1,4]oxazin]-8'-yl]ethan-1-one	6.4434	6.4434	Unknown	3	50	312.191	[M+H]+	311.185	0.0011827	3.634	N-alkylpiperazines	WRDFHQJYELTFBC-UHFFFAOYSA-N	O=C(N1CC2N(CCOC2)C3(C1)CN(C3)C4COC4)COC	COCONUT=CNP0005715	0.000742918	0.000827462	0.000791076	0.000128814	0.000124444	0.000127468	0.000795235	0.000695497	0.000755242	0.000657902	0.000656514	0.00101393	0.000399572	0.000404269	0.000374884	0.00041918	0.000316142	0.000242778	0.00029604	0.000571564	0.000652742	0.000504125	0
675	pos_362	Simple ID		1	pos	362	1.448	137.045	[M+H]+	generic	C5H4N4O	Hypoxanthine	5.1401	5.1401	Unknown	3	20	137.045	[M+H]+	136.039	0.0004872	2.981	Hypoxanthines	FDGQSTZJBFJUBT-UHFFFAOYSA-N	OC1=NC=NC=2N=CNC12	HMDB=HMDB0000157,KNApSAcK=C00001502,ChEBI=CHEBI:17368,SMPDB=PW_C000102,YMDB=YMDB00555,T3DB=T3D4150,FooDB=FDB003949,STOFF=STOFF_8667,BMDB=BMDB00157,Urine=HMDB0000157,Saliva=HMDB0000157,Feces=HMDB0000157,ECMDB=ECMDB00157,CSF=HMDB0000157,Serum=HMDB0000157,PubChem=790,PlantCyc=HYPOXANTHINE,UNPD=UNPD77089,BLEXP=BLEXPDB00135398638,COCONUT=CNP0229561	0	0	7.60951e-05	0	0	0	0.000249222	0.000157308	0.000192135	8.57513e-05	8.38002e-05	0.00191114	0.000188259	0.00020038	0.000216493	0.000210903	0.000122008	0.00012272	0.00012525	0.000306784	0.000478816	0.000186032	0
676	pos_3647	Unknown compound		1	pos	3647	25.912	313.234	[M+Na]+																		0	6.46391e-05	5.90775e-05	0.000148318	0.000147285	0.000160674	0.000122625	0.00124876	0.00119603	7.71494e-05	7.79992e-05	7.94013e-05	0.000229203	0.000246329	0.000232463	0.000314826	0.000593991	0.000335423	0.000136759	0	0	0	0
677	pos_365	Simple ID		1	pos	365	6.532	137.046	[M+H]+	generic	C5H4N4O	Hypoxanthine	5.1981	5.1981	Unknown	3	25	137.046	[M+H]+	136.039	0.0001872	3.039	Hypoxanthines	FDGQSTZJBFJUBT-UHFFFAOYSA-N	OC1=NC=NC=2N=CNC12	HMDB=HMDB0000157,KNApSAcK=C00001502,ChEBI=CHEBI:17368,SMPDB=PW_C000102,YMDB=YMDB00555,T3DB=T3D4150,FooDB=FDB003949,STOFF=STOFF_8667,BMDB=BMDB00157,Urine=HMDB0000157,Saliva=HMDB0000157,Feces=HMDB0000157,ECMDB=ECMDB00157,CSF=HMDB0000157,Serum=HMDB0000157,PubChem=790,PlantCyc=HYPOXANTHINE,UNPD=UNPD77089,BLEXP=BLEXPDB00135398638,COCONUT=CNP0229561	0	0	0	0	0	0	0	0	0	0	0	0	0	0	0	0.000129807	0	0	0	0	0	0	0.0001734
678	pos_3651	Simple ID		1	pos	3651	23.512	313.248	[M+H]+	generic	C17H32N2O3	N-{[4-(cyclohexylamino)-3-hydroxyoxolan-2-yl]methyl}-3,3-dimethylbutanamide	5.6892	5.6892	Unknown	3	36	313.248	[M+H]+	312.241	0.0007693	3.549	Cyclohexylamines	POCOPVKVDQUAMH-UHFFFAOYSA-N	O=C(NCC1OCC(NC2CCCCC2)C1O)CC(C)(C)C	COCONUT=CNP0015216	0	0	0	0	0	0	0	0	0	0	0	0	9.86898e-05	0	8.74822e-05	8.92255e-05	0	0	0	0	0	0	0
679	pos_3693	Simple ID		1	pos	3693	21.634	314.232	[M+H]+	generic	C17H31NO4	9-Decenoylcarnitine	7.6544	7.6544	Unknown	3	34	314.232	[M+H]+	313.225	0.0007849	4.508	Acyl carnitines	GOOOCIIXFLVRAG-UHFFFAOYNA-N	O=C([O-])CC(OC(=O)CCCCCCCC=C)C[N+](C)(C)C	HMDB=HMDB0013205,ChEBI=CHEBI:88543,YMDB=YMDB01528,FooDB=FDB029331,LipidMAPS=LMFA07070048,Urine=HMDB0013205,Serum=HMDB0013205,BLEXP=BLEXPDB00053481651,COCONUT=CNP0085207	0	0	0	0.000813839	0.00094539	0.000840596	0	0	0	0	0	0	0.000128793	0.000116834	0.000105472	0.000114099	0	0	0	0	0	0	0
680	neg_1258	Simple ID	Other possible annotated peaks for this cluster.	2	neg	1258	14.101	313.177	[M-H]-	generic	C15H26N2O5	N-{4-hydroxy-5-[(morpholin-4-yl)methyl]oxolan-3-yl}oxane-4-carboxamide	6.5033	6.5033	Unknown	3	33	313.177	[M-H]-	314.184	-0.0002045	3.876	Morpholines	BEKMULBFJCLNDG-UHFFFAOYSA-N	O=C(NC1COC(CN2CCOCC2)C1O)C3CCOCC3	COCONUT=CNP0016894	0	0	0	0.000943337	0.00156449	0.00158534	0	0	0	0	0	0	0.000302703	0	0.000284527	0.000289698	0	0.000191622	0	0	0	0	0
681	pos_373	Simple ID		1	pos	373	9.224	138.055	[M+H]+	generic	C7H7NO2	2-Aminobenzoic acid	6.1973	6.1973	Unknown	3	25	138.055	[M+H]+	137.048	0.0003549	3.405	Aminobenzoic acids	RWZYAGGXGHYGMB-UHFFFAOYSA-N	O=C(O)C=1C=CC=CC1N	HMDB=HMDB0001123,KNApSAcK=C00007382,ChEBI=CHEBI:16567;CHEBI:30754,DrugBank=DB04056;DB04166,SMPDB=PW_C000877,YMDB=YMDB00278,T3DB=T3D4165,FooDB=FDB000896;FDB030679,NANPDB=NANPDB_3852,STOFF=STOFF_7408,BMDB=BMDB01123,Urine=HMDB0001123,Feces=HMDB0001123,ECMDB=ECMDB01123,CSF=HMDB0001123,Serum=HMDB0001123,PubChem=5459842;227,PlantCyc=ANTHRANILATE,UNPD=UNPD99279,BLEXP=BLEXPDB00000000227,COCONUT=CNP0152283	0	0	0	0	0	0	0	0	0	5.83194e-05	0.000105454	0.00208893	7.37406e-05	8.30863e-05	8.2699e-05	9.06406e-05	0	0	0	0	0	0	0
682	pos_3736	Simple ID		1	pos	3736	14.016	316.165	[M+H]+	generic	C17H21N3O3	2-{1-acetyl-3-[(1H-1,3-benzodiazol-2-yl)methyl]piperidin-4-yl}acetic acid	6.4633	6.4633	Unknown	3	54	316.165	[M+H]+	315.158	0.000668	3.779	Benzimidazoles	YKMNBFRPYZMLGB-UHFFFAOYSA-N	O=C(O)CC1CCN(C(=O)C)CC1CC2=NC=3C=CC=CC3N2	COCONUT=CNP0379679	0	0	0	0	0	0	0.000244817	0.000246498	0.000226406	0	0	0	7.52181e-05	6.69113e-05	0	8.79469e-05	6.34559e-05	0	5.6092e-05	0.000166949	0.000225047	0.000208714	0
683	pos_3743	Simple ID		1	pos	3743	15.201	316.223	[M+H]+	generic	C15H29N3O4	1-(4-hydroxy-5-{[2-(methoxymethyl)pyrrolidin-1-yl]methyl}oxolan-3-yl)-3-(propan-2-yl)urea	6.2424	6.2424	Unknown	3	24	316.223	[M+H]+	315.216	0.0004829	3.712	N-alkylpyrrolidines	KACGUSWMXJZKMN-UHFFFAOYSA-N	O=C(NC(C)C)NC1COC(CN2CCCC2COC)C1O	COCONUT=CNP0016335	0	0	0	0.00137277	0.00132523	0.00140976	0	0	0	0	0	0	0.000234454	0.000200849	0.000202997	0.000217633	0	0	0	0	0	0	0
684	pos_3747	Simple ID		1	pos	3747	22.758	316.247	[M+H]+	generic	C17H33NO4	Decanoylcarnitine	6.7445	6.7445	Unknown	3	23	316.247	[M+H]+	315.241	0.001335	3.766	Acyl carnitines	LZOSYCMHQXPBFU-UHFFFAOYNA-N	O=C([O-])CC(OC(=O)CCCCCCCCC)C[N+](C)(C)C	HMDB=HMDB0000651;HMDB0062631,ChEBI=CHEBI:28717;CHEBI:68830,FooDB=FDB022162,BMDB=BMDB00651,LipidMAPS=LMFA07070006;LMFA07070059,Urine=HMDB0000651,Feces=HMDB0000651,Serum=HMDB0000651,BLEXP=BLEXPDB00010245190,COCONUT=CNP0346664	0	0	0	0.0107317	0.00977656	0.0100501	0	0	0	0	0	0	0.0017289	0.00154269	0.00149148	0.00152756	7.80557e-05	6.13144e-05	7.56662e-05	0	0	0	0
685	pos_3752	Simple ID		1	pos	3752	7.617	317.112	[M+H]+	generic	C16H16N2O5	N-{4-[hydroxy(5-oxomorpholin-3-yl)methyl]phenyl}furan-2-carboxamide	6.3155	6.3155	Unknown	3	69	317.112	[M+H]+	316.106	0.0011981	3.625	1,4-oxazines	SQWOWKHPPBSWAC-UHFFFAOYSA-N	O=C(NC1=CC=C(C=C1)C(O)C2NC(=O)COC2)C=3OC=CC3	COCONUT=CNP0004520	0.000121978	0.000111667	0.000145333	8.52616e-05	9.18277e-05	0.000112965	0.00011715	0.000121855	0.00011894	0.000144639	0.000224923	0.000214014	0.000109883	0.000118424	0.000119145	0.000120741	0.000180337	9.49534e-05	0.000141106	0.000326522	0.000300963	0.000312828	0
686	pos_3761	Unknown compound		1	pos	3761	20.233	317.172	[2M+H]+																		0	0	0	0	0	0	0	0	0	0	0	0	6.75977e-05	6.43951e-05	0	0	0.000269193	0.000212816	0.000283646	0	0	0	0
687	pos_3767	Simple ID		2	pos	3767	13.559	317.192	[M+H]+	generic	C20H28OS	9a,11a-dimethyl-2,3,3a,3b,4,5,7,8,9,9a,9b,10,11,11a-tetradecahydrospiro[cyclopenta[a]phenanthrene-1,2'-thiiran]-7-one	3.8585	3.8585	Unknown	3	36	317.192	[M+H]+	316.186	0.001463	2.312	Oxosteroids	JFDOJKGTOKPEKW-UHFFFAOYSA-N	O=C1C=C2CCC3C(CCC4(C)C3CCC54SC5)C2(C)CC1	COCONUT=CNP0363266	0	0	0	0	0	0	0	0.000225893	0.000401289	0	0	0	8.93583e-05	9.9757e-05	0	9.37925e-05	0.000177981	0.000176778	0.000185291	0	0	0	0
688	pos_3772	Simple ID		1	pos	3772	10.885	317.218	[M+H]+	generic	C14H28N4O4	UNPD141357	7.3798	7.3798	Unknown	3	39	317.218	[M+H]+	316.211	-6.82e-05	4.216	Aminocyclitols and derivatives	RRCVSEIUUWDDGJ-UQNVNURBNA-N	OC1C(OC2OC(=CCC2N)CN)C(N)CC(OC)C1NC	UNPD=UNPD141357,COCONUT=CNP0127806	0.000554967	0.000595504	0.000634921	0	0	0	0	0	0	0	0	0	7.63133e-05	6.35266e-05	5.86951e-05	6.25647e-05	0	0	0	0	0	0	0
689	pos_3775	Unknown compound		2	pos	3775	10.693	318.143	[M+H]+																		0	0	0	6.0807e-05	6.04059e-05	6.75152e-05	0.00027836	0.000242468	0.000239742	0	0	0	8.93267e-05	9.69586e-05	0.000100772	9.77211e-05	9.74553e-05	6.9782e-05	8.75186e-05	0.00021875	0.000239964	0.000200113	0
690	pos_3788	Simple ID		1	pos	3788	8.086	318.216	[M+H]+	generic	C18H27N3O2	1-{2,8-dimethyl-1H,2H,3H,4H,4aH,5H,9bH-pyrido[4,3-b]indol-5-yl}-2-[(3-hydroxypropyl)amino]ethan-1-one	5.6563	5.6563	Unknown	3	45	318.216	[M+H]+	317.21	0.0015036	3.268	Alpha amino acid amides	YVHMDUOTURLDTR-UHFFFAOYSA-N	O=C(N1C2=CC=C(C=C2C3CN(C)CCC13)C)CNCCCO	COCONUT=CNP0326312	0.000143326	0.000128607	0.000137055	7.00674e-05	9.07248e-05	8.64674e-05	0.000285	0.000241072	0.000249503	0	0.000172538	0.000129783	0.00010785	0.000130388	0.000126913	0.000145042	0.000117489	9.01711e-05	0.00011098	0.000194658	0.000161701	0	0
691	pos_3805	Simple ID		1	pos	3805	25.278	319.224	[M+Na]+	generic	C18H32O3	13S-hydroxyoctadecadienoic acid	5.9262	5.9262	Unknown	3	31	319.224	[M+Na]+	296.235	0.0006656	3.393	Lineolic acids and derivatives	HNICUWMFWZBIFP-IRQZEAMPSA-N	O=C(O)CCCCCCCC=CC=CC(O)CCCCC	HMDB=HMDB0004667;HMDB0061708;HMDB0112194,KNApSAcK=C00000403,ChEBI=CHEBI:34154;CHEBI:72639;CHEBI:90850;CHEBI:94780;CHEBI:133819;CHEBI:136655;CHEBI:137495,DrugBank=DB06926,FooDB=FDB023395,BMDB=BMDB04667;BMDB06939,LipidMAPS=LMFA02000035;LMFA02000154;LMFA02000155;LMFA02000190;LMFA02000228;LMFA02000236,Urine=HMDB0004667,Saliva=HMDB0061708,CSF=HMDB0004667,Serum=HMDB0004667,PubChem=6443013,UNPD=UNPD1136…	0	0	0	0	0	0	0	0.000292616	0.00037505	0	0	0	7.79163e-05	8.79441e-05	8.04641e-05	0.000105354	0.000240892	0.000124213	0.000120615	0	0	0	0
692	pos_3815	Simple ID		1	pos	3815	9.919	320.123	[M+H]+	generic	C15H17N3O5	UNPD167744	6.0016	6.0016	Unknown	3	53	320.123	[M+H]+	319.117	0.0014971	3.457	Pyrrolo[4,3,2-de]quinolines	AUNGFOATFKRUPG-XDINSTSQNA-N	O=C1C(N)=CC2=NCCC3=CN(C1=C23)C4OC(CO)C(O)C4O	UNPD=UNPD167744,COCONUT=CNP0416557	0	0.00014591	0.000152337	0	0	0	0.000437799	0.000372894	0.000399372	0	0	0.000283301	0.000146798	0.000168407	0.000168395	0.000179977	0.000144118	9.75038e-05	0	0.000305854	0	0	0
693	pos_3816	Simple ID		1	pos	3816	9.401	320.125	[M+H]+	generic	C15H17N3O5	UNPD220658	5.9641	5.9641	Unknown	3	60	320.125	[M+H]+	319.117	-0.0009029	3.37	Alpha amino acids and derivatives	SXFOZGYJEJAZDJ-DOMZBBRYSA-N	O=C1NC(C(=O)N(OC)C1(O)CC2=CNC=3C=CC=CC32)CO	UNPD=UNPD220658,NPA=NPA004693,COCONUT=CNP0227346	0.000150819	0.000177824	0.000156394	0	0	0	0.000305574	0.00025339	0.000287181	0	0	0.000260169	0.000119418	0.000121437	0.000128966	0.000133703	0.000113046	8.04307e-05	9.22884e-05	0.000222073	0.000259438	0	0
694	pos_3836	Simple ID		1	pos	3836	9.898	320.673	[M+2H]2+	generic	C38H45N3O6	CNP0446956	4.7724	4.7724	Unknown	3	60	320.673	[M+2H]2+	639.331	0.0001891	2.95	Gingerdiones	VPWZIFOMMYDFTN-UHFFFAOYSA-N	O=C(CCC1=CC(OC)=C(O)C(=C1)C2C=3C=CN=C(N)C3C=CC2(CO)CC4=CC=CN4)C(O)C(=O)CC5C=CC6CCCCC6C5	COCONUT=CNP0446956	0	0	0	0	0	0	0	0	0	0	0	0	0.000325988	0.000324279	0.000348154	0.000369792	0	0	0	0	0	0	0
695	pos_384	Simple ID		1	pos	384	12.063	138.127	[M+H]+	generic	C9H15N	CNP0429982	5.2854	5.2854	Unknown	3	27	138.127	[M+H]+	137.12	0.0005259	2.858	Quinuclidines	CZBKLGBIRBXUCK-UHFFFAOYSA-N	C=CC12CCN(CC1)CC2	COCONUT=CNP0429982	0	0	0.000155244	8.49943e-05	8.88458e-05	8.55394e-05	0.000240674	0.000226712	0.000239234	0.000132483	0.000141458	0.000129549	0.000106934	0.000116898	0.000117477	0.000118375	0.000103893	9.3471e-05	0.00011268	0.000216614	0.000205113	0.00019059	0
696	pos_386	Simple ID		1	pos	386	11.641	138.127	[M+H]+	generic	C9H15N	CNP0429982	5.5667	5.5667	Unknown	3	30	138.127	[M+H]+	137.12	0.0003259	3.12	Quinuclidines	CZBKLGBIRBXUCK-UHFFFAOYSA-N	C=CC12CCN(CC1)CC2	COCONUT=CNP0429982	0.000278005	0.000255251	0.000271154	9.94401e-05	8.53594e-05	9.4149e-05	0.000306684	0.000273873	0.000269232	0.00020297	0.000244917	0.000231829	0.000142387	0.000153823	0.000148548	0.000152339	0	0	8.83948e-05	0.000240034	0.000286703	0	0
697	pos_3865	Simple ID		1	pos	3865	16.879	322.037	[M+H]+	generic	C14H11NO6S	CNP0430840	4.7744	4.7744	Unknown	3	37	322.037	[M+H]+	321.031	0.0008845	2.923	Benzanilides	DUQUTBDEZKDIDN-UHFFFAOYSA-N	O=C(O)C1=CC(=CC(=C1)S(=O)(=O)O)NC(=O)C=2C=CC=CC2	COCONUT=CNP0430840	0	0	0	7.95707e-05	0.000100046	8.42985e-05	0.000109355	0.00012674	0.000117891	0.000896858	0.000798365	0.000578193	0.000121584	0.000121513	0.000111847	0.000115788	5.50604e-05	6.11598e-05	6.37484e-05	0.000254789	0.000346544	0.000386471	0
698	pos_3878	Unknown compound		1	pos	3878	12.932	322.21	[M+H]+																		0.000621374	0.000611215	0.000671587	0.000173741	0.000170443	0.000150179	0.00075744	0.000690902	0.000736312	0.000994339	0.000790936	0.00062491	0.000381192	0.000393579	0.000389485	0.000419581	0.000182084	0.000161989	0.000181189	0.00111271	0.00120319	0.00114621	0
699	pos_3879	Simple ID		1	pos	3879	12.673	322.213	[M+H]+	generic	C17H27N3O3	2-(hydroxymethyl)-3-[(2-methylpyrimidin-4-yl)methyl]-4-[(oxan-4-yl)amino]cyclopentan-1-ol	5.8691	5.8691	Unknown	3	53	322.213	[M+H]+	321.205	-8.18e-05	3.5	Aralkylamines	BWEIPIYTKZSENB-UHFFFAOYSA-N	OCC1C(O)CC(NC2CCOCC2)C1CC3=NC(=NC=C3)C	COCONUT=CNP0357539	0	0	0	0.000218047	0.000258283	0.000303463	0.000395387	0.000347543	0.000382459	0.000370863	0.000353187	0.000287812	0	0.000185262	0.000188748	0.000212319	0.000160429	0	0.000158541	0.000438692	0.00051441	0.000411237	0
700	pos_3897	Simple ID		1	pos	3897	12.248	324.103	[M+H]+	generic	C11H21N3O4S2	2-[[(2R)-2-ammonio-3-[5-(methylthio)pentanehydroximoylthio]propanoyl]amino]acetate	5.1059	5.1059	Unknown	3	81	324.103	[M+H]+	323.097	0.0013246	3.1	Peptides	FPKWDSJLQYQAEF-UEFOHQGUSA-N	O=C([O-])CNC(=O)C([NH3+])CSC(=NO)CCCCSC	PubChem=90658770,PlantCyc=CPD-12394	0	0	0	9.53196e-05	0.00010585	9.80718e-05	0.000399111	0.000415928	0.000381514	7.32935e-05	0	0	0.000136266	0.000109036	0.000108149	0	0.000178314	0.000107031	0.000187186	0.000237588	0.000265877	0	0
701	pos_3904	Simple ID		1	pos	3904	8.549	324.146	[M+H]+	generic	C17H17N5O2	1-benzyl-5-[3-(pyrazin-2-yl)-1,2,4-oxadiazol-5-yl]pyrrolidin-3-ol	6.6092	6.6092	Unknown	3	41	324.146	[M+H]+	323.138	-0.0003988	3.885	Phenylmethylamines	VYAILTUAEGUCMR-UHFFFAOYSA-N	OC1CN(CC=2C=CC=CC2)C(C3=NC(=NO3)C=4N=CC=NC4)C1	COCONUT=CNP0410447	0.000448984	0	0.000504351	0.000304991	0.000326222	0.000315742	0.000748208	0.000667405	0.000668827	0	0.000690675	0.000703446	0.00033667	0.000356323	0.000330001	0.00039578	0.000271427	0.000227004	0.000301117	0.000424262	0.000432436	0.000358476	0.000237795
702	neg_1334	Simple ID	Other possible annotated peaks for this cluster.	3	neg	1334	12.277	322.14	[M-H]-	generic	C15H21N3O5	Streptcytosine G	4.9198	4.9198	Unknown	3	28	322.14	[M-H]-	323.148	0.0008443	2.909	Hydroxypyrimidines	TYKNEQGBFJLSFS-DMTCVQMQSA-N	O=C(C=C(C)C)NC1=NC(=O)N(C=C1)C2OC(C)C(O)C(O)C2	NPA=NPA025445,COCONUT=CNP0071350	0.0007026	0.000797861	0.000692172	0	0	0	0.000804533	0.000491596	0.000504716	0.00253829	0.00157637	0.0036215	0.000576178	0.000436789	0.000447292	0.000433017	0	0	0	0.00135991	0.0016596	0.00080728	0
703	pos_3395	Simple ID	Other possible annotated peaks for this cluster.	2	pos	3395	10.469	302.206	[M+H]+	generic	C14H27N3O4	N-({3-hydroxy-4-[(1-methylpiperidin-4-yl)amino]oxolan-2-yl}methyl)-2-methoxyacetamide	5.3131	5.3131	Unknown	3	45	302.206	[M+H]+	301.2	0.0011328	3.385	Aminopiperidines	BAMIMZJJGNFRSB-UHFFFAOYSA-N	O=C(NCC1OCC(NC2CCN(C)CC2)C1O)COC	COCONUT=CNP0254022	0	0	0	0	0	0	0	0	0	0	0	0	0	0	9.84396e-05	0.000107365	0.000836213	0.000640572	0.000849526	0	0	0	0
704	pos_2959	Simple ID	Other possible annotated peaks for this cluster.	12	pos	2959	13.212	284.138	[M+H]+	generic	C16H17N3O2	Brevianamide F;L-Prolyl-L-tryptophan anhydride	7.6839	7.6839	Unknown	3	35	284.138	[M+H]+	283.132	0.0013532	3.754	Alpha amino acids and derivatives	RYFZBPVMVYTEKZ-UHFFFAOYNA-N	O=C1NC(C(=O)N2CCCC12)CC3=CNC=4C=CC=CC43	KNApSAcK=C00011280,ChEBI=CHEBI:64530,NANPDB=NANPDB_4077;NANPDB_4091;NANPDB_4092,PubChem=181567,UNPD=UNPD30169;UNPD7007,NPA=NPA020299,COCONUT=CNP0164818	0.00191265	0.00178541	0.00208035	0.000348297	0.000357327	0.000344461	0.000971723	0.000871957	0.000806784	0.00172211	0.00224411	0.00206294	0.000654432	0.000692398	0.000778956	0.000759056	0.000618099	0.000493339	0.00062985	0.00136012	0.00135436	0.00123222	0.000117008
705	pos_3917	Simple ID		1	pos	3917	11.513	325.14	[M+H]+	generic	C15H20N2O6	1-(2,3-dihydro-1,4-benzodioxin-6-yl)-3-[2,3-dihydroxy-4-(hydroxymethyl)cyclopentyl]urea	6.6243	6.6243	Unknown	3	41	325.14	[M+H]+	324.132	-0.0001872	4.048	Benzo-1,4-dioxanes	BUOQCWFMSUZKBN-UHFFFAOYSA-N	O=C(NC1=CC=C2OCCOC2=C1)NC3CC(CO)C(O)C3O	COCONUT=CNP0149902	0.000185507	0.000168821	0.000200945	8.3882e-05	6.00604e-05	7.9305e-05	0.000205207	0.000194748	0.000194085	0.00017311	0.000242293	0.00019786	0.000118668	0.00013946	0.000141481	0.000131539	0.00015179	7.57983e-05	0.000136675	0.000285566	0.000285446	0.000240937	0
706	pos_3935	Double ID		2	pos	3935	9.897	326.038	[M+H]+	generic	C11H11N5O3S2	Urothion	6.5609	6.5609	Unknown	3	50	326.038	[M+H]+	325.03	-0.0004923	3.647	Pterins and derivatives	RPUOVNROVSNPBD-UHFFFAOYNA-N	O=C1N=C(N)NC2=NC=3SC(=C(SC)C3N=C12)C(O)CO	HMDB=HMDB0002377,FooDB=FDB022985,BMDB=BMDB02377,UNPD=UNPD174512;UNPD21899,BLEXP=BLEXPDB00135804811,COCONUT=CNP0141350	0.000121356	0.000119454	0.00015561	0	0	0	0.000861195	0.000621849	0.000878403	0	0	0	0.000173889	0.000172283	0.000186719	0.000182491	0.000217624	0.000128714	0.000241039	0	0	0	0
707	pos_3941	Simple ID		1	pos	3941	23.703	326.149	[M+H]+	generic	C18H19N3O3	2-{1-[(furan-2-yl)methyl]pyrrolidin-3-yl}-5-(4-methoxyphenyl)-1,3,4-oxadiazole	6.0836	6.0836	Unknown	3	30	326.149	[M+H]+	325.143	0.0008179	3.723	Anisoles	VANYECZHGYORLO-UHFFFAOYSA-N	N=1N=C(OC1C=2C=CC(OC)=CC2)C3CN(CC=4OC=CC4)CC3	COCONUT=CNP0134478	0.000587006	0.000637542	0.000609048	0.000115936	0.000124199	0.000129306	0.00033024	0.000348765	0.000374127	0.000420147	0.000416855	0.000371595	0.000279975	0.000239468	0.000233739	0.00023434	0.00023738	0.000142948	0.000279958	0.000407692	0.000553905	0.000513566	0
708	neg_971	Double ID	Other possible annotated peaks for this cluster.	6	neg	971	14.601	287.197	[M-H]-	generic	C14H28N2O4	Valinoctin B	6.3239	6.3239	Unknown	3	32	287.197	[M-H]-	288.205	0.0007309	3.722	Hybrid peptides	VLUDHYVPNMGNDL-WSWARRKISA-N	O=C(O)C(NC(=O)C(O)C(N)CCC(C)CC)C(C)C	NPA=NPA007934,COCONUT=CNP0351604	0	0	0	0	0	0	0	0	0	0	0	0	0.00395582	0.00380208	0.00395251	0.00403991	0.0151843	0.0182703	0.0150222	0	0	0	0
709	pos_3972	Simple ID		1	pos	3972	10.487	327.2	[M+H]+	generic	C14H30O8	Heptaethylene glycol	5.3145	5.3145	Unknown	3	60	327.2	[M+H]+	326.194	0.0009444	3.012	Polyethylene glycols	XPJRQAIZZQMSCM-UHFFFAOYSA-N	OCCOCCOCCOCCOCCOCCOCCO	HMDB=HMDB0061835,ChEBI=CHEBI:44748,Saliva=HMDB0061835,Feces=HMDB0061835,BLEXP=BLEXPDB00000079718	0.00018914	0	0.000202703	0.000125088	0.000120928	0.00013725	0.000261203	0.000260449	0.000302358	0.00015825	0.000223423	0.000215692	0.000213062	0.000224233	0.000220842	0.000218261	0	0	0	0.000335088	0.000305116	0.00027999	0
710	pos_3976	Unknown compound		1	pos	3976	26.855	327.25	[M+Na]+																		0.000334984	0.000440778	0.000424711	0.000511917	0.000497076	0.00059165	0.000907677	0.00163645	0.00127172	0.00026685	0.000503966	0.000521399	0.000466829	0.000474147	0.000428523	0.000541548	0.000362147	0.000292176	0.000109281	0	0	0.000228522	0.000268126
711	pos_3983	Double ID		2	pos	3983	18.86	328.092	[M+H]+	generic	C16H13N3O5	N-{3-nitro-4-[2-(4-nitrophenyl)ethenyl]phenyl}acetamide	5.9663	5.9663	Unknown	3	33	328.092	[M+H]+	327.086	0.000397	3.673	Stilbenes	DVHXZLWEJPHDRW-UHFFFAOYSA-N	O=C(NC1=CC=C(C=CC2=CC=C(C=C2)[N+](=O)[O-])C(=C1)[N+](=O)[O-])C	COCONUT=CNP0042985	0.000174762	0.000181253	0.000195507	0	0	0	0.000161109	0.000138359	0.000150519	0.000168011	0.000151429	0.000139048	8.0406e-05	7.18996e-05	7.10077e-05	7.99565e-05	5.6587e-05	0	5.33156e-05	0.000117862	0.000142972	0.000135552	0
712	pos_3985	Simple ID		1	pos	3985	14.455	328.131	[M+H]+	generic	C16H22ClNO4	Salinosporamide I	6.0011	6.0011	Unknown	3	66	328.131	[M+H]+	327.124	0.0004123	3.464	Alpha amino acids and derivatives	OHEOUKCSOLOBHI-FXPQKAFVNA-N	O=C1OC2(CC)C(C(=O)NC12C(O)C3C=CCCC3)CCCl	KNApSAcK=C00040196,NPA=NPA004124,COCONUT=CNP0352964	0.000122788	0.00012802	0.000112771	0	0	4.8865e-05	0.000109538	0	0	0.000159169	0.000126868	0.000114565	7.10251e-05	0	0	0	0	5.44547e-05	6.27011e-05	0.000132704	0.000166221	0.00014531	0
713	pos_3986	Simple ID	Other possible annotated peaks for this cluster.	2	pos	3986	22.167	328.14	[M+H]+	generic	C15H21NO7	Sesbanimide A;(+)-Sesbanimide A	4.9385	4.9385	Unknown	3	51	328.14	[M+H]+	327.132	-0.0013215	2.845	Piperidinediones	ULQATHQJWVNXEJ-UHFFFAOYNA-N	O=C1NC(=O)CC(C1)C2OCOC(C2O)C3(O)OCC(=C)C3C	KNApSAcK=C00047351;C00047352,UNPD=UNPD167062;UNPD37156;UNPD44727;UNPD74554,NPA=NPA014917,COCONUT=CNP0230839	0.000130942	0.000177875	0.000224599	0	0	0	0.000511451	0.000282035	0	0.000987075	0.000389836	0.000187064	0.000336343	0.000328746	0.000281019	0.000328688	0	0	0	0.00178596	0.00276755	0.00491677	0
714	pos_3987	Simple ID		1	pos	3987	21.923	328.141	[M+H]+	generic	C15H21NO7	Sesbanimide A;(+)-Sesbanimide A	5.3123	5.3123	Unknown	3	48	328.141	[M+H]+	327.132	-0.0015215	2.975	Piperidinediones	ULQATHQJWVNXEJ-UHFFFAOYNA-N	O=C1NC(=O)CC(C1)C2OCOC(C2O)C3(O)OCC(=C)C3C	KNApSAcK=C00047351;C00047352,UNPD=UNPD167062;UNPD37156;UNPD44727;UNPD74554,NPA=NPA014917,COCONUT=CNP0230839	0.000119734	0.000155012	0.000181321	0	3.76851e-05	0	0.000875517	0.000304163	0.000233367	0.000805086	0.000280433	0.000160546	0.000323735	0.000300579	0.000264524	0.000287018	0.000105558	0.000127741	7.32464e-05	0.00125564	0.00214289	0.00338712	0
715	pos_3994	Simple ID		1	pos	3994	9.526	328.186	[M+H]+	generic	C15H25N3O5	2-[(3-acetamido-4,5-dihydroxycyclohex-1-en-1-yl)formamido]-4-methylpentanamide	5.8299	5.8299	Unknown	3	70	328.186	[M+H]+	327.179	0.0010974	3.253	Leucine and derivatives	FWMZYQUIKXYASJ-UHFFFAOYSA-N	O=C(NC(C(=O)N)CC(C)C)C1=CC(NC(=O)C)C(O)C(O)C1	COCONUT=CNP0096464	0.000398133	0.000445063	0.000437901	0	0	0	0	0	0	0	0	0.000607674	0	0.00026811	0	0	0	0	0	0	0.000663335	0.000464655	0
716	pos_3995	Simple ID		1	pos	3995	9.686	328.186	[M+H]+	generic	C15H25N3O5	2-[(3-acetamido-4,5-dihydroxycyclohex-1-en-1-yl)formamido]-4-methylpentanamide	5.646	5.646	Unknown	3	79	328.186	[M+H]+	327.179	0.0004974	3.241	Leucine and derivatives	FWMZYQUIKXYASJ-UHFFFAOYSA-N	O=C(NC(C(=O)N)CC(C)C)C1=CC(NC(=O)C)C(O)C(O)C1	COCONUT=CNP0096464	0	0	0	0.000109203	0.00010425	0	0	0.000408013	0.000420955	0.000330879	0	0	0	0.000268906	0.000273235	0.000281251	0.000300962	0.000238203	0.000286898	0.00057921	0	0.000479535	0
717	pos_3996	Simple ID		1	pos	3996	13.553	328.186	[M+H]+	generic	C15H25N3O5	CNP0434382	5.2592	5.2592	Unknown	3	61	328.186	[M+H]+	327.179	0.0003974	3.186	Hybrid peptides	IJVCBLOFNMNMFC-UHFFFAOYSA-N	O=C(OC)C1N(C(=O)C2CCNCC2)CCN(C(=O)COC)C1	COCONUT=CNP0434382	0.000151668	0.000150043	0.000157334	0	0	0	0.000283599	0.000206595	0.000212445	7.80586e-05	0	0	0	9.26657e-05	0	0	9.98013e-05	9.16281e-05	9.83244e-05	0.00022966	0.000254472	0	0
718	pos_3997	Simple ID		1	pos	3997	12.693	328.186	[M+H]+	generic	C15H25N3O5	2-({6-[(cyclohexylcarbamoyl)amino]-hexahydrofuro[3,2-b]furan-3-yl}oxy)acetamide	5.5696	5.5696	Unknown	3	34	328.186	[M+H]+	327.179	0.0003974	3.225	Furofurans	RAVYTTOSUDVCDV-UHFFFAOYSA-N	O=C(NC1CCCCC1)NC2COC3C(OCC(=O)N)COC32	COCONUT=CNP0103809	0.000212327	0.000202857	0.000223576	0	0	0	0.000240422	0.000163272	0.000184983	0.000102917	0.000145657	0.000267044	8.24373e-05	0.00010264	0	9.81604e-05	0	5.31061e-05	0	0.000211778	0.000233639	0.0001661	0
719	pos_4005	Simple ID		1	pos	4005	14.348	328.222	[M+H]+	generic	C16H29N3O4	468:PN:WO2005081628 SEQID:470 claimed protein;Diprotin B	6.7567	6.7567	Unknown	3	33	328.222	[M+H]+	327.216	0.0013829	3.673	Oligopeptides	NHXZRXLFOBFMDM-ISUDBTBINA-N	O=C(O)C(NC(=O)C1N(C(=O)C(N)C(C)C)CCC1)CC(C)C	KNApSAcK=C00018580,NPA=NPA020917,COCONUT=CNP0315235	0	0	0	0.00178381	0.00394408	0.00359523	0	0	0	0	0	0	0.000568624	0.000543501	0.000482909	0.000543683	9.16098e-05	0.000186661	0.000109772	0	0	0	0
720	pos_4008	Simple ID		1	pos	4008	12.844	328.222	[M+H]+	generic	C16H29N3O4	468:PN:WO2005081628 SEQID:470 claimed protein;Diprotin B	6.2275	6.2275	Unknown	3	34	328.222	[M+H]+	327.216	0.0010829	3.429	Oligopeptides	NHXZRXLFOBFMDM-ISUDBTBINA-N	O=C(O)C(NC(=O)C1N(C(=O)C(N)C(C)C)CCC1)CC(C)C	KNApSAcK=C00018580,NPA=NPA020917,COCONUT=CNP0315235	0.000572344	0.000608508	0.000581527	0	9.26043e-05	0	0.000377368	0.000245772	0.000227605	0.000560483	0.000478269	0.000406862	0.000267666	0.000239822	0.000236516	0.000251883	9.74403e-05	7.14039e-05	9.19725e-05	0.000464424	0.000471821	0.000576547	0
721	pos_4017	Simple ID		1	pos	4017	22.668	328.247	[M+H]+	generic	C18H33NO4	(9E)-9-nitrooctadecenoic Acid	7.398	7.398	Unknown	3	25	328.247	[M+H]+	327.241	0.001335	4.287	Long-chain fatty acids	CQOAKBVRRVHWKV-SAPNQHFASA-N	O=C(O)CCCCCCCC(=CCCCCCCCC)N(=O)=O	HMDB=HMDB0062738,ChEBI=CHEBI:86329,LipidMAPS=LMFA01120004,BLEXP=BLEXPDB00011645581,COCONUT=CNP0098602	0	0	0	0.00135303	0.00158328	0.00152971	0	0	0	0	0	0	0.000235788	0.000215209	0.000182718	0.000207644	0	0	0	0	0	0	0
722	pos_4029	Simple ID		1	pos	4029	12.339	329.15	[M+H]+	generic	C18H20N2O4	Phenylalanyl-Tyrosine	6.747	6.747	Unknown	3	43	329.15	[M+H]+	328.142	-0.0001164	3.918	Dipeptides	FSXRLASFHBWESK-UHFFFAOYNA-N	O=C(O)C(NC(=O)C(N)CC=1C=CC=CC1)CC2=CC=C(O)C=C2	HMDB=HMDB0029007,ChEBI=CHEBI:73637,UNPD=UNPD128683,BLEXP=BLEXPDB00013341191,COCONUT=CNP0373054	0.000482487	0.000477294	0.000407978	0.000181648	0.000142116	0.000131409	0	0	0	0.000145396	0.000115791	8.54959e-05	0.000179549	0.000197907	0.000182808	0.000194103	0.000258893	0.000313889	0.000272418	0.000552359	0.000398131	0.000879475	0
723	pos_4031	Unknown compound		1	pos	4031	14.196	329.156	[M+H]+																		9.89837e-05	9.93661e-05	9.52979e-05	0	0	0	0	0	0	0	0	0	5.65554e-05	6.00118e-05	0	0	0	0	0.000136973	0	0	0	0
724	pos_4041	Simple ID		2	pos	4041	15.739	329.206	[M+H]+	generic	C16H28N2O5	N-[(2S,3S,6R)-2-(hydroxymethyl)-6-[2-oxo-2-(1-piperidinyl)ethyl]-3-oxanyl]-2-methoxyacetamide	6.3251	6.3251	Unknown	3	24	329.206	[M+H]+	328.2	0.0014984	3.747	C-glycosyl compounds	DVRCOHXMQROJRA-RDMRCOCINA-N	O=C(NC1CCC(OC1CO)CC(=O)N2CCCCC2)COC	ChEBI=CHEBI:118542;CHEBI:118554;CHEBI:118555;CHEBI:118637;CHEBI:118638;CHEBI:118652;CHEBI:118711;CHEBI:118794	0	0	0	0.00150758	0.00315074	0.00283825	0	0	0	0	0	0	0.000461149	0.000415116	0.000429791	0.000479156	0.000133432	0.000245883	0.000158108	0	0	0	0
725	pos_4044	Simple ID		1	pos	4044	22.735	329.208	[M+H]+	generic	C16H28N2O5	N-[(3,4-dihydroxy-5-{[(propan-2-yl)carbamoyl]methyl}oxolan-2-yl)methyl]cyclopentanecarboxamide	7.6621	7.6621	Unknown	3	21	329.208	[M+H]+	328.2	-0.0007016	4.637	C-glycosyl compounds	LDEGHLAPFQRIRZ-UHFFFAOYSA-N	O=C(NC(C)C)CC1OC(CNC(=O)C2CCCC2)C(O)C1O	COCONUT=CNP0026899	0.00111216	0.000994555	0.00106076	0	0	0	0.00111186	0.000523803	0.00053342	0	0	0	0.000298072	0.000274651	0.000257103	0.00026534	0	0	0	0	0	0	0
726	pos_4056	Simple ID		1	pos	4056	19.054	330.054	[M+H]+	generic	C15H11N3O4S	6-{[(7-methoxy-4-oxo-4H-chromen-3-yl)methylidene]amino}-2-sulfanylidene-1,2,3,4-tetrahydropyrimidin-4-one	5.0088	5.0088	Unknown	3	46	330.054	[M+H]+	329.047	0.0003033	3	Chromones	OYHOCVJWMNVIOK-UHFFFAOYSA-N	O=C1C=C(N=CC2=COC3=CC(OC)=CC=C3C2=O)NC(=S)N1	COCONUT=CNP0331951	8.92156e-05	0.000102956	9.64197e-05	0	0	0	0	0	0	8.1872e-05	7.34617e-05	0	6.06243e-05	0	5.7239e-05	0	0	0	0	0	0	0	9.21691e-05
727	pos_4060	Simple ID		1	pos	4060	15.845	330.18	[M+H]+	generic	C18H23N3O3	4-(4-phenyl-1H-pyrazol-1-yl)-2-[(propan-2-yl)amino]-6,8-dioxabicyclo[3.2.1]octan-3-ol	6.1956	6.1956	Unknown	3	46	330.18	[M+H]+	329.174	0.001518	3.434	Phenylpyrazoles	CNSRFUGWAUABGR-UHFFFAOYSA-N	OC1C(NC(C)C)C2OC(OC2)C1N3N=CC(=C3)C=4C=CC=CC4	COCONUT=CNP0247521	0	4.81292e-05	0	0	0	0	0.000213737	0.000192058	0.000204875	3.90398e-05	0	0	6.51074e-05	0	0	0	5.574e-05	4.27615e-05	4.99078e-05	0.000137632	0.000158061	0.000134973	0
728	pos_4062	Simple ID		1	pos	4062	14.596	330.181	[M+H]+	generic	C18H23N3O3	2-{1-acetyl-3-[(6-methyl-1H-1,3-benzodiazol-2-yl)methyl]piperidin-4-yl}acetic acid	5.9895	5.9895	Unknown	3	49	330.181	[M+H]+	329.174	0.000618	3.444	Benzimidazoles	AVMPDAVBSGHIKH-UHFFFAOYSA-N	O=C(O)CC1CCN(C(=O)C)CC1CC2=NC=3C=CC(=CC3N2)C	COCONUT=CNP0016416	0	0	0	0	4.58584e-05	0	0.000165003	0.000151105	0.000149447	0	0	0	6.08007e-05	0	0	0	0	0	0	0.000108774	0.000126215	0	0
729	pos_4065	Simple ID		3	pos	4065	12.169	330.202	[M+H]+	generic	C15H27N3O5	UNPD210894	6.2684	6.2684	Unknown	3	75	330.202	[M+H]+	329.195	0.0008474	3.535	Medium-chain hydroxy acids and derivatives	OVBUHDGPEBMHDL-XQDQGMHRSA-N	O=C(O)C(CCC=C(C)CO)C1NC(=N)N(CC(O)CCO)C1	UNPD=UNPD210894,COCONUT=CNP0410748	0.000496619	0.000538965	0.000512756	0.000274119	0.000265792	0.000260862	0.000455261	0.000419113	0.000419867	0.000555452	0.000534527	0.000509554	0.000327289	0.000329058	0.000336197	0.000361469	0.000267314	0.00023191	0.000263309	0.000528855	0.000594193	0.000609648	8.5142e-05
730	neg_1426	Double ID		2	neg	1426	20.612	328.19	[M-H]-	generic	C20H27NO3	Trilostane	6.7212	6.7212	Unknown	3	25	328.19	[M-H]-	329.199	0.0013173	3.944	Estrane steroids	KVJXBPDAXMEYOA-CXANFOAXSA-N	N#CC1=C(O)C2OC32CCC4C5CCC(O)C5(C)CCC4C3(C)C1	HMDB=HMDB0015240,ChEBI=CHEBI:32260,DrugBank=DB01108,Urine=HMDB0015240,Serum=HMDB0015240,BLEXP=BLEXPDB00000535161,COCONUT=CNP0074360	0	0	0	0.000463111	0.000386084	0	0	0	0	0	0	0	0.000304439	0.000338339	0.000336203	0.0003247	0.000638162	0.000612315	0.000562926	0.00137573	0.000541499	0.00065667	0
731	pos_4086	Simple ID		1	pos	4086	13.869	331.171	[M+H]+	generic	C23H22O2	ethyl 3-(4,4-diphenylcyclohex-1-en-1-yl)prop-2-ynoate	4.6717	4.6717	Unknown	3	45	331.171	[M+H]+	330.162	-0.0014436	2.708	Diphenylmethanes	OBOOXHFOHSTWJD-UHFFFAOYSA-N	O=C(C#CC1=CCC(C=2C=CC=CC2)(C=3C=CC=CC3)CC1)OCC	COCONUT=CNP0240749	0	0	0	0	0	0	0	9.08856e-05	9.69749e-05	0	0	0	8.95186e-05	8.0729e-05	7.37142e-05	7.9061e-05	0.000271367	0.000158705	0.000359549	0	0	0	0
732	pos_41	Unknown compound		1	pos	41	4.258	105.07	[M+H]+																		0.00226078	0.00201195	0.00213958	0.0014292	0	0.00136976	0.00226072	0.00185951	0.00211765	0	0.00121668	0.000953013	0.00183689	0.00193548	0.00196803	0	0.00243836	0	0.00247686	0.00647601	0	0.00365583	0
733	pos_4106	Simple ID		1	pos	4106	10.565	332.16	[M+H]+	generic	C17H21N3O4	Polanrazine E	6.6967	6.6967	Unknown	3	64	332.16	[M+H]+	331.153	0.0007826	3.92	Alpha amino acids and derivatives	CZKPEZCMZQJQAP-RXQGYGPJNA-N	O=C1NC(OC)(C(=O)NC1(O)CC2=CNC=3C=CC=CC32)C(C)C	KNApSAcK=C00027014,UNPD=UNPD76395,NPA=NPA015852,COCONUT=CNP0400892	0.000301734	0.00029462	0.000300951	0	0	0	0	0	0	0	0	0.000233368	0.000156135	0	0.000145473	0	0.000217214	0	0.000204807	0	0	0	0
734	pos_4108	Simple ID		1	pos	4108	10.654	332.16	[M+H]+	generic	C17H21N3O4	Polanrazine E	6.5499	6.5499	Unknown	3	63	332.16	[M+H]+	331.153	8.26e-05	3.925	Alpha amino acids and derivatives	CZKPEZCMZQJQAP-RXQGYGPJNA-N	O=C1NC(OC)(C(=O)NC1(O)CC2=CNC=3C=CC=CC32)C(C)C	KNApSAcK=C00027014,UNPD=UNPD76395,NPA=NPA015852,COCONUT=CNP0400892	0	0	0	0	0	0	0	0	0	0	0	0	0	0	0	0.000154961	0	0.000166514	0	0.000430343	0.000424975	0.000410915	0
735	pos_4141	Unknown compound		1	pos	4141	17.793	334.173	[M+H]+																		0	0	0	0.000453977	0.000543781	0.00047162	0	0	0	0	0	0	5.56055e-05	5.5326e-05	0	0	0	0	0	0	0	0	0
736	pos_4147	Simple ID		1	pos	4147	9.128	334.187	[M+H]+	generic	C16H23N5O3	3-{[4-(methoxymethyl)-1H-1,2,3-triazol-1-yl]methyl}-5-{[(pyridin-3-yl)methyl]amino}cyclopentane-1,2-diol	5.758	5.758	Unknown	3	70	334.187	[M+H]+	333.18	0.000266	3.544	Aralkylamines	XDJYIBVZQCAINN-UHFFFAOYSA-N	OC1C(O)C(CN2N=NC(=C2)COC)CC1NCC=3C=NC=CC3	COCONUT=CNP0007470	0.00042817	0.00042647	0.000454256	0.000194447	0.000218462	0.000205224	0.000722531	0.000676086	0.000687689	0.000513436	0.000487242	0	0.000316611	0.00031255	0.000301809	0.000322327	0.000231562	0.000169563	0.000217331	0.00066806	0.000675288	0.00060377	0
737	pos_4157	Simple ID		1	pos	4157	13.556	335.144	[M+H]+	generic	C13H22N2O8	4-formamido-alpha-D-threo-pentopyranosyl-(1->3)-4-formamido-alpha-D-rhamnopyranose	6.34	6.34	Unknown	3	60	335.144	[M+H]+	334.138	0.0004921	3.78	Monosaccharides	DCRWYNSADVEDLG-UVRUOYAKSA-N	O=CNC1COC(OC2C(O)C(O)OC(C)C2NC=O)CC1O	ChEBI=CHEBI:137645	0	0	0	0	0	0	0	0	0	0.000159035	0.000158135	8.5876e-05	8.56273e-05	6.66723e-05	6.12967e-05	6.27645e-05	0	0	0	0	0	0	0
738	pos_4159	Simple ID		1	pos	4159	22.46	335.15	[M+2H]2+	generic	C37H40N4O8	3-(14,16-dihydroxy-3-methyl-1,7-dioxo-3,4,5,6,7,8,9,10-octahydro-1H-2-benzoxacyclotetradecin-15-yl)-3-(4-methoxyphenyl)-N-{2-[3-(pyridin-2-yl)-1,2,4-oxadiazol-5-yl]ethyl}propanamide	5.2128	5.2128	Unknown	3	34	335.15	[M+2H]2+	668.285	-0.0006329	3.233	Zearalenones	RTFWPWVLNGHTFL-UHFFFAOYSA-N	O=C1OC(C)CCCC(=O)CCCC=CC=2C=C(O)C(=C(O)C12)C(C3=CC=C(OC)C=C3)CC(=O)NCCC4=NC(=NO4)C=5N=CC=CC5	COCONUT=CNP0319098	8.50319e-05	9.89096e-05	0.000109935	0	0	0	0.000230587	0.000103242	0	0.000211946	5.86816e-05	0	7.89137e-05	6.9362e-05	6.83106e-05	6.83706e-05	0	4.30845e-05	0	0.000188874	0.000309588	0.000598255	0
739	pos_4188	Unknown compound		1	pos	4188	12.952	336.165	[M+H]+																		0.000429447	0.000407904	0.000416436	0.00230095	0	0.0022551	0.00037395	0.000321002	0.000275327	0.00498553	0.0049211	0.00441833	0.00114622	0.00111506	0.00104041	0.0010979	0.00182771	0.00146824	0.0018152	0.000466875	0.000621375	0.00066127	4.98119e-05
740	pos_4222	Simple ID		1	pos	4222	11.013	338.145	[M+H]+	generic	C14H19N5O5	Tecadenoson	6.8711	6.8711	Unknown	3	20	338.145	[M+H]+	337.139	0.0009952	3.863	Purine nucleosides	OESBDSFYJMDRJY-BAYCTPFLSA-N	OCC1OC(N2C=NC=3C(=NC=NC32)NC4COCC4)C(O)C1O	DrugBank=DB04954,BLEXP=BLEXPDB00000158795,COCONUT=CNP0331485	0	0	0	0	0	0	0.00356835	0	0	0.00908731	0.00792209	0.00648132	0.000817493	0.000847816	0.000819118	0.0008437	0	0	0	0	0	0.000480559	0
741	pos_4230	Simple ID		2	pos	4230	12.183	338.206	[M+H]+	generic	C17H27N3O4	6-[2-(4-acetylpiperazin-1-yl)ethyl]-3-hydroxy-N-(prop-2-yn-1-yl)oxane-2-carboxamide	6.1017	6.1017	Unknown	3	60	338.206	[M+H]+	337.2	0.0013328	3.374	C-glycosyl compounds	IVTWQIZNEREQHM-UHFFFAOYSA-N	O=C(N1CCN(CC1)CCC2OC(C(=O)NCC#C)C(O)CC2)C	COCONUT=CNP0400853	0.000336164	0.000336575	0.000363401	0	0.000101165	8.89689e-05	0.000135612	0.000121158	0.000117915	0.000355193	0.000331392	0.000327717	0.000135565	0.000143128	0.0001509	0.000149882	0.000108013	7.78462e-05	0.000100237	0.000230923	0.000253041	0.000274397	0
742	pos_4256	Simple ID		1	pos	4256	10.868	340.098	[M+H]+	generic	C14H17N3O5S	N-{3-[(carbamoylmethyl)carbamoyl]-5,6-dihydroxycyclohex-2-en-1-yl}thiophene-2-carboxamide	5.2011	5.2011	Unknown	3	58	340.098	[M+H]+	339.089	-0.0015319	3.077	N-acyl-alpha amino acids and derivatives	PGTMVKLYEDTRDK-UHFFFAOYSA-N	O=C(N)CNC(=O)C1=CC(NC(=O)C=2SC=CC2)C(O)C(O)C1	COCONUT=CNP0242019	0.000126452	0.000138963	0	0.000130445	0.000128818	0.000139378	0.000228802	0.000229959	0.000217232	0	0	0	0	0.000115919	0.000115893	0.000123304	0.000154073	9.88068e-05	0.000152842	0.000313782	0.000304253	0.000203847	0
743	pos_4257	Unknown compound		1	pos	4257	11.135	340.099	[M+H]+																		0	0.000140272	0	0.000292382	0.000280429	0.000285988	0.000342801	0.000293121	0.000281974	0	0.000151804	0.000167846	0.000151156	0.000180177	0.000176068	0.000202116	0.000338244	0.000197881	0.000318703	0.000388252	0.000385118	0.000299395	0
744	pos_4259	Simple ID		1	pos	4259	9.667	340.124	[M+H]+	generic	C13H17N5O6	N(2)-carboxyethyl-2'-deoxyguanosine	6.2608	6.2608	Unknown	3	61	340.124	[M+H]+	339.118	0.0010597	3.684	Purine 2'-deoxyribonucleosides	MXNKUBJIXVVNPY-UNYLCCJPSA-N	O=C(O)C(NC1=NC2=C(N=CN2C3OC(CO)C(O)C3)C(=O)N1)C	ChEBI=CHEBI:62029;CHEBI:62035;CHEBI:62036,BLEXP=BLEXPDB00135566002	0.000458046	0.000507272	0.000607954	0	0	0	0.000205622	0.00020253	0.000188034	0.00257036	0.0025681	0.00218795	0.000302737	0.000324904	0.000335721	0.000356018	0	0	0	0.000291004	0.000259375	0.000121964	0
745	pos_4268	Simple ID		1	pos	4268	15.134	340.209	[M+Na]+	generic	C16H31NO5	3-hydroxynonanoyl carnitine	4.9765	4.9765	Unknown	3	63	340.209	[M+Na]+	317.22	4.38e-05	3.129	Acyl carnitines	ZILZDFSDUXZZAT-UHFFFAOYNA-N	O=C([O-])CC(OC(=O)CC(O)CCCCCC)C[N+](C)(C)C	HMDB=HMDB0061635	0	0	0	0.000196043	0.000214632	0.000245562	0	0.000174881	0.000195826	0	0.000150168	0	8.69563e-05	9.90094e-05	8.76534e-05	0.000108492	0	0	0	0.000208856	0	0	0
746	pos_4270	Simple ID		1	pos	4270	15.431	340.21	[M+H]+	generic	C14H25N7O3	9-[6(S),9-diamino-5,6,7,8,9-pentadeoxy-beta-D-ribo-nonafuranosyl]-9H-purin-6-amine	6.0702	6.0702	Unknown	3	57	340.21	[M+H]+	339.202	-0.0004359	3.82	5'-deoxyribonucleosides	IRPVYKULMDQOJU-JYWUPBTONA-P	OC1C(O)C(OC1N2C=NC=3C(=NC=NC32)N)CC([NH3+])CCC[NH3+]	ECMDB=ECMDB20463	0	9.80365e-05	0.000101839	0.000264637	0.000332361	0.000366375	0	0	0	0.000103292	0	0	5.99916e-05	0	0	0	0	0	0	0	0.000141743	0.00012222	0
747	pos_4271	Simple ID		1	pos	4271	12.827	340.21	[M+H]+	generic	C14H25N7O3	5'-[(3-aminopropyl)methylamino]-5'-deoxyadenosine	6.1798	6.1798	Unknown	3	39	340.21	[M+H]+	339.202	-0.0005359	3.874	5'-deoxyribonucleosides	FRPWQMPGADKOIA-FUKOTSDTNA-P	OC1C(O)C(OC1N2C=NC=3C2=NC=NC3[NH3+])CNCCC[NH2+]C	ECMDB=ECMDB20460	0	0	0	0.000630416	0.000854634	0.000985451	0	0	0	0	0	0	0	0.000107408	0	0	0	3.59992e-05	0	0	0	0	0
748	pos_4275	Simple ID		1	pos	4275	10.803	340.223	[M+H]+	generic	C17H29N3O4	CNP0434156	5.2325	5.2325	Unknown	3	83	340.223	[M+H]+	339.216	0.0001829	3.122	1,4-diazepines	IEQQAKDXGKWGFU-UHFFFAOYSA-N	O=C(OC)CCC1N(C)C2CCN(C2C(=O)NC1)C3CCOCC3	COCONUT=CNP0434156	0.000226803	0.000215868	0.00023629	0	0	0	0	0	0	0	0.000189628	0	8.6098e-05	0	0	0	0	0	0	0	0	0	0
749	pos_4277	Simple ID		1	pos	4277	13.799	340.223	[M+H]+	generic	C17H29N3O4	6-{[5-(methoxymethyl)-1,2-oxazol-3-yl]methyl}-2-{[(piperidin-4-yl)amino]methyl}oxan-3-ol	6.1248	6.1248	Unknown	3	55	340.223	[M+H]+	339.216	-0.0002171	3.404	C-glycosyl compounds	VKUVUSCPSUVPLE-UHFFFAOYSA-N	OC1CCC(OC1CNC2CCNCC2)CC3=NOC(=C3)COC	COCONUT=CNP0344620	0.000254951	0.000266461	0.000242367	6.54626e-05	6.31687e-05	6.48446e-05	0.000224488	0.00017805	0.000200038	0.000250193	0.000223328	0.00020649	0.000117531	0.000119135	0.000115664	0.000119999	9.30965e-05	0	9.02986e-05	0.00017253	0.000234073	0.000194051	0
750	pos_4280	Simple ID		1	pos	4280	14.939	340.683	[M+2H]2+	generic	C31H49N7O10	UNPD18408	5.2758	5.2758	Unknown	3	40	340.683	[M+2H]2+	679.354	0.0026437	2.733	Cyclic depsipeptides	KHOLPVDDEDKHJE-BUQBMFMYNA-N	O=C(O)C(CC(=O)N1N=CCCC1C(=O)NC2C(=O)NC(C(=O)NC(C(=O)N3NCC(O)CC3C(=O)OC2)C)CC(C)C)CCCCC	UNPD=UNPD18408,NPA=NPA000730,COCONUT=CNP0133853	0.00166633	0.00136499	0.00143987	0	0	0	0	0	0	0	0	0	0.000145486	0.000132078	0.000125298	0.000130436	0	0	0	0	0	0	0
751	neg_703	Double ID		5	neg	703	17.801	267.159	[M-H]-	generic	C15H24O4	Acoric acid	6.8726	6.8726	Unknown	3	31	267.159	[M-H]-	268.167	0.0006828	3.674	Menthane monoterpenoids	ZIOCYJNRYIRTQD-JOGVEPCDNA-N	O=C(O)CC(C)C1(C(=O)C(C)C)CC(=O)C(C)CC1	HMDB=HMDB0038165,KNApSAcK=C00021588,FooDB=FDB017395,UNPD=UNPD134737;UNPD36751,COCONUT=CNP0256372	0	0	0	0	0	0	0	0	0	0	0	0	0.00369977	0.00374579	0.00382669	0.00379492	0.0163281	0.0179021	0.0163212	0	0	0	0
752	pos_4309	Unknown compound		1	pos	4309	9.627	341.679	[M+2H]2+																		0	0	0	0	0	0	0	0	0	0	0	0	0	0	0	6.04418e-05	0	0	0	0	0	0	0
753	pos_4324	Simple ID		1	pos	4324	8.273	342.177	[M+H]+	generic	C14H23N5O5	4-Acetyl-4-Guanidino-6-Methyl(Propyl)Carboxamide-4,5-Dihydro-2h-Pyran-2-Carboxylic Acid	6.8288	6.8288	Unknown	3	30	342.177	[M+H]+	341.17	0.0004953	3.976	Pyrans	QPJWMZVTNXFTKV-JMJZKYOTSA-N	O=C(O)C=1OC(C(=O)N(C)CCC)C(NC(=O)C)C(C1)NC(=N)N	DrugBank=DB03503	8.43249e-05	8.42144e-05	9.20421e-05	0	0	0	0	0	0	7.15094e-05	0.00015703	0.000149398	7.44712e-05	8.36775e-05	8.37319e-05	9.68611e-05	0.0002936	0.000150674	0.00025455	0.000117194	0.000119981	0	0
754	pos_4328	Unknown compound		1	pos	4328	9.533	342.2	[M+H]+																		0.000268471	0.0002764	0.000290715	0	0	0	0.000342937	0.000274567	0.000285562	0.000214118	0.000213861	0	0.000137032	0.00014082	0.000148907	0.000151969	8.05533e-05	6.74602e-05	7.39711e-05	0.000151316	0.000164514	0.000119141	0
755	neg_1532	Double ID		2	neg	1532	14.238	340.187	[M-H]-	generic	C16H27N3O5	1-[(3-hydroxy-6-{[5-(methoxymethyl)-1,2-oxazol-3-yl]methyl}oxan-2-yl)methyl]-3-(propan-2-yl)urea	6.5135	6.5135	Unknown	3	36	340.187	[M-H]-	341.195	0.0007945	3.716	C-glycosyl compounds	VCGYFKQDUFCSHK-UHFFFAOYSA-N	O=C(NCC1OC(CC2=NOC(=C2)COC)CCC1O)NC(C)C	COCONUT=CNP0010813	0.000966077	0.000975999	0.00084638	0	0	0	0.000693791	0.000542815	0.000530175	0.00106015	0.000954416	0.00112793	0.000489748	0.000454535	0.000462824	0.000489656	0.000419075	0.000394404	0.000380549	0.000818791	0.000574845	0.000988915	0
756	pos_4350	Simple ID		7	pos	4350	11.221	343.129	[M+Na]+	generic	C21H20O3	Abbottin	4.95	4.95	Unknown	3	29	343.129	[M+Na]+	320.141	0.0013652	3	5-O-methylated flavonoids	VVPMOJMAMXGTAR-UHFFFAOYNA-N	O(C1=CC=2OC(C(=C)C)CC2C=3OC(C=CC13)C=4C=CC=CC4)C	KNApSAcK=C00019426,LipidMAPS=LMPK12020282,UNPD=UNPD126155;UNPD30759,COCONUT=CNP0213188	0.00424228	0.00393266	0.00463052	0.000539981	0.00038413	0.000448421	0.00217569	0.000643856	0.000957446	0.00245949	0.00403312	0.00386487	0.00257214	0.00284638	0.00309174	0.00289587	0.00185008	0.00133735	0.00169658	0.0138638	0.0097142	0.00639003	0
757	pos_438	Simple ID		1	pos	438	8.494	142.066	[M+H]+	generic	C10H7N	1H-indene-2-carbonitrile	3.5884	3.5884	Unknown	3	25	142.065	[M+H]+	141.058	-0.0003743	1.659	Indenes and isoindenes	CZDPRZRDSRPXDF-UHFFFAOYSA-N	N#CC1=CC=2C=CC=CC2C1	COCONUT=CNP0127189	0	0	0	0	0	0	0	0	0	0	0	0	0	0	7.08462e-05	0	6.50448e-05	7.20886e-05	7.03691e-05	0.000271651	0.000259276	0.000256117	0
758	pos_13179	Unknown compound		2	pos	13179	13.583	761.382	[M+2H]2+																		0	0	0	0	0	0	0	0	0	0	0	0	0.000221182	0.000259322	0.000244274	0.000244423	0	0	0	0	0	0	0
759	pos_10018	Unknown compound		2	pos	10018	10.543	593.778	[M+2H]2+																		0	0	0	9.81028e-05	6.69589e-05	5.07166e-05	0	0	0	0	0	0	0.000481199	0.000540264	0.000603096	0.000617482	0	0	0	0.00259394	0.00190822	0.00230182	0
760	pos_4390	Simple ID		1	pos	4390	27.002	344.278	[M+H]+	generic	C19H37NO4	2-(3-hydroxyheptadecanamido)acetic acid	5.7096	5.7096	Unknown	3	30	344.278	[M+H]+	343.272	0.0013351	3.607	N-acyl-alpha amino acids	IEWHONSDBIATGX-UHFFFAOYSA-N	O=C(O)CNC(=O)CC(O)CCCCCCCCCCCCCC	COCONUT=CNP0346709	0	0	0	0.000147143	0.000150674	0.000246553	8.77158e-05	0.000241032	0	0.000115101	0.000387177	0.000374661	9.70648e-05	9.8519e-05	9.48993e-05	0.000102417	5.67777e-05	0.000101222	8.63646e-05	0.000120877	0	0	0
761	pos_4400	Simple ID		1	pos	4400	12.293	345.152	[M+Na]+	generic	C15H22N4O4	Monamidocin;(S)-N-[5-[(Aminoiminomethyl)amino]-2-hydroxy-1-oxopentyl]-L-phenylalanine	5.3285	5.3285	Unknown	3	79	345.152	[M+Na]+	322.164	0.0014259	3.014	Phenylalanine and derivatives	UVIGFTRCBVMVNN-XXCBQWOANA-N	O=C(O)C(NC(=O)C(O)CCCNC(=N)N)CC=1C=CC=CC1	KNApSAcK=C00016603,UNPD=UNPD51763,NPA=NPA003399,COCONUT=CNP0102501	0.000259774	0.000172698	0.000172672	0.000133283	5.87122e-05	0.00015205	0.000666418	0.00055061	0.000523939	0.000317496	0.00104108	0.000791197	0.000273454	0.000307397	0.000334437	0.000318854	0.000378823	0.000154224	0.000482718	0.000412379	0.00105101	0.000310943	0
762	pos_11815	Simple ID	Other possible annotated peaks for this cluster.	2	pos	11815	15.318	689.428	[M+H]+	generic	C40H56N4O6	N''-(2-{25-[(cyclohexylamino)methoxy]-7,15-dihydroxy-6-methoxy-13-oxo-23-oxatetracyclo[16.7.1.0?,??.0??,??]hexacosa-1(25),5(10),6,8,18(26),19(24)-hexaen-3-yn-21-yl}ethyl)-N-(2-methylpropyl)guanidine	5.7381	5.7381	Unknown	3	48	689.428	[M+H]+	688.42	-0.001138	3.593	1-benzopyrans	ZWJDAVZPHCKRQZ-UHFFFAOYSA-N	O=C1CCC2=CC=C(O)C(OC)=C2C#CCC=3C=C(C4=C(OCC(C4)CCN=C(N)NCC(C)C)C3OCNC5CCCCC5)CCC(O)C1	COCONUT=CNP0266888	0	0	0	0	0	0	0	0	0	0	0	0	0.000210916	0.000189355	0.000144226	0.000196941	0	0	0	0	0	0	0
763	pos_3899	Simple ID	Other possible annotated peaks for this cluster.	2	pos	3899	9.345	324.128	[M+H]+	generic	C12H21NO9	methyl N-acetylneuraminate	6.2816	6.2816	Unknown	3	37	324.128	[M+H]+	323.122	0.0009077	3.823	N-acylneuraminic acids and derivatives	BKZQMWNJESHHSA-PQYSTZNASA-N	O=C(NC1C(O)CC(O)(OC1C(O)C(O)CO)C(=O)OC)C	ChEBI=CHEBI:62303,STOFF=STOFF_6305,COCONUT=CNP0040478	0.011627	0.0125967	0.0143038	0	0	0	0.0176364	0.0135141	0.015342	0.0101863	0.00988323	0.00829979	0.00670388	0.0070896	0.00713474	0.00739982	0	0	0	0.0114383	0.0105822	0.0111424	0
764	pos_4419	Simple ID		1	pos	4419	12.928	346.139	[M+H]+	generic	C17H19N3O5	CNP0445364	5.9193	5.9193	Unknown	3	82	346.139	[M+H]+	345.132	0.0008472	3.426	Alpha amino acids and derivatives	TZHAWLYVPOQGOL-UHFFFAOYSA-N	O=C(O)CCC(=O)N1CCC2NC(=O)N(C(=O)C12)CC=3C=CC=CC3	COCONUT=CNP0445364	0	9.35437e-05	0.000103606	6.81468e-05	5.43037e-05	7.13121e-05	0.000155251	0.000180798	0.000160801	0.000151672	0.000158574	0.000229584	8.91551e-05	8.83409e-05	7.58029e-05	8.88073e-05	7.00983e-05	0	5.29248e-05	0.000289281	0.000351195	0.000232247	0
765	pos_442	Simple ID		1	pos	442	17.166	142.159	[M+H]+	generic	C9H19N	(+)-N-methylconiine	7.2088	7.2088	Unknown	3	30	142.159	[M+H]+	141.152	0.0001261	4.172	Alkaloids and derivatives	CUBHREGSQFAWDJ-IMWMWJONNA-N	N1(C)CCCCC1CCC	KNApSAcK=C00002055,ChEBI=CHEBI:32,PubChem=25203444,PlantCyc=CPD-9426,UNPD=UNPD147369;UNPD84299,COCONUT=CNP0256186	0	0	0	0.000409892	0.000520156	0.000477118	0	0	0	0	0	0	8.40007e-05	7.92694e-05	7.45558e-05	7.97818e-05	0	0	0	0	0	0	0
766	pos_4438	Simple ID		1	pos	4438	13.222	347.107	[M+H]+	generic	C13H18N2O9	UNPD105587	5.0118	5.0118	Unknown	3	73	347.108	[M+H]+	346.101	0.0010066	3.013	O-glycosyl compounds	JNOBKBGUTMPMPS-MFLNNMAONA-N	N#CC1(OC2OC(O)C(O)C(O)C2O)C(OC)=CC(=O)N(C)C1O	UNPD=UNPD105587;UNPD50059,COCONUT=CNP0285841	0.000193114	0.000178165	0.000216487	0.000758097	0.00057921	0.000703455	0.000208843	0.000406072	0.000212399	0.000465113	0.000718152	0.000949409	0.000352749	0.000457603	0.000461129	0.000489197	0.000359498	0.000104427	0.000238492	0.00223357	0.00160519	0.000990299	0
767	pos_4446	Simple ID		1	pos	4446	19.685	347.182	[M+H]+	generic	C15H26N2O7	Acmimycin;Spenolimycin	5.6716	5.6716	Unknown	3	20	347.182	[M+H]+	346.174	-0.0008224	3.382	1,4-dioxanes	JXUOVTMVWNHOAJ-LONWDQNGNA-N	OC1C2OC3OC(C=C(OC)C3(O)OC2C(NC)C(O)C1NC)C	KNApSAcK=C00018616,ChEBI=CHEBI:81421,UNPD=UNPD142857;UNPD151453,NPA=NPA020898,COCONUT=CNP0269820	0.000376905	0.000375083	0.000343723	0	0	0	0.000191736	0.000128435	0.000128555	0	0	0	6.08996e-05	0	0	0	0	0	0	0	0	0	0
768	pos_4448	Simple ID		1	pos	4448	12.997	347.204	[M+Na]+	generic	C16H28N4O3	CNP0439595	4.3711	4.3711	Unknown	3	43	347.204	[M+Na]+	324.216	0.0012615	2.523	N-acylpyrrolidines	NOVSBOGLUGJRAX-UHFFFAOYSA-N	O=C(N1CCCC1COC)CCC2N3CC(N)CC3C(=O)NC2	COCONUT=CNP0439595	0	0	0	0	5.94235e-05	0	0	0.000314581	0.000553151	0	0	0	0.000148489	0.000162346	0.000125796	0.000163267	0.000213476	0.000195621	0.000229703	0	9.69022e-05	0	0
769	pos_4449	Simple ID		1	pos	4449	16.995	347.218	[M+H]+	generic	C16H30N2O6	PANTOTHENYL-AMINOETHANOL-11-PIVALIC ACID	5.7139	5.7139	Unknown	3	37	347.218	[M+H]+	346.21	-0.0001369	3.528	Beta amino acids and derivatives	BUEKNBNKVUKNIB-STGVRZAANA-N	O=C(NCCO)CCNC(=O)C(O)C(C)(C)COC(=O)C(C)(C)C	DrugBank=DB08328	0.000945832	0.00110285	0.0011319	0	0	0	0	0	0	0	0	0	9.88688e-05	8.68969e-05	7.49211e-05	8.86153e-05	0	0	0	0	0	0	0
770	pos_3924	Simple ID	Other possible annotated peaks for this cluster.	2	pos	3924	24.973	325.236	[M+H]+	generic	C19H32O4	(-)-Pironetin;NK 10958;NL 9C;PA 48153c;Pironetin	4.8082	4.8082	Unknown	3	13	325.236	[M+H]+	324.23	0.000936	2.891	Fatty alcohols	XIHGDBYGUWEHCV-GQGLJEDTNA-N	O=C1OC(CC(O)C(C)C(OC)C(C)CC=CC)C(C=C1)CC	KNApSAcK=C00016637,UNPD=UNPD97761,NPA=NPA017150,COCONUT=CNP0370207	0	0	0	0	0	0	0.000698703	0.000135235	0	0.0014855	0	0.000440316	0.000136235	0.000117706	0.000109938	0.000106456	0.000367453	0.000194615	6.61725e-05	0	0.000250986	0	0
771	pos_1495	Simple ID		2	pos	1495	19.553	214.18	[M+H]+	generic	C12H23NO2	CNP0441482	5.7521	5.7521	Unknown	3	30	214.18	[M+H]+	213.173	0.0004554	3.533	Bicyclic monoterpenoids	PKOYVVAVBNTFRN-UHFFFAOYSA-N	OCCNC1C(O)C2(C)CCC1C2(C)C	COCONUT=CNP0441482	0	0	0	0.00108353	0.0011929	0.00110276	0	0	0	4.79116e-05	0	0	0.000197315	0.000185685	0.000179129	0.000186065	0	0	0	0	0	0	0
772	pos_4465	Simple ID		1	pos	4465	12.399	348.191	[M+Na]+	generic	C17H23N7	N-(1-adamantyl)-6-(3,5-dimethyl-1-pyrazolyl)-1,2,4,5-tetrazin-3-amine	4.3713	4.3713	Unknown	3	85	348.191	[M+Na]+	325.201	-0.0004856	2.606	Aminotetrazines	MZJQFYGLAXOAGY-UHFFFAOYSA-N	N=1N=C(N=NC1NC23CC4CC(CC(C4)C2)C3)N5N=C(C=C5C)C	ChEBI=CHEBI:107423	0.000119958	0.000113866	0.000106674	5.85451e-05	6.39554e-05	6.36606e-05	0.000158299	0.000107496	0.000122214	0.000302019	0.00023438	0.000181293	0.000101761	8.80406e-05	0.0001011	0.000105147	6.02772e-05	4.74799e-05	0	0.000293504	0.000326064	0.000293001	0
773	pos_4468	Unknown compound		1	pos	4468	12.893	348.191	[M+Na]+																		0.000119108	0.000114393	0.000117307	0	0	0	0.000191609	0.000139781	0.00015716	0.000237702	0.000201257	0.000168191	9.45691e-05	8.1424e-05	9.78669e-05	9.65517e-05	6.75252e-05	0	7.71791e-05	0.000164013	0.000196774	0.00021492	0
774	neg_1386	Simple ID		7	neg	1386	18.895	325.202	[M-H]-	generic	C18H30O5	Albocycline M-3	7.8703	7.8703	Unknown	3	30	325.202	[M-H]-	326.209	0.0002476	4.289	Macrolides and analogues	HYUFUJWFFITERP-CGPNDXRYNA-N	O=C1OC(C)C(C)C(O)CC=C(C)C(OC)C=CC(O)(C)CC1	KNApSAcK=C00022144,UNPD=UNPD54770,COCONUT=CNP0312333	0.0415616	0.0385122	0.04086	0	0	0	0.0375609	0.037194	0.038235	0	0	0	0.0144328	0.015375	0.0157791	0.0158334	0	0	0	0	0	0	0
775	pos_45	Simple ID		1	pos	45	0.956	106.068	[M+H]+	generic	C4H11NS	3-methylthiopropylamine	7.6633	7.6633	Unknown	3	16	106.068	[M+H]+	105.061	0.0002968	4.64	Dialkylthioethers	KKYSBGWCYXYOHA-UHFFFAOYSA-N	S(C)CCCN	ChEBI=CHEBI:16696;CHEBI:57866,UNPD=UNPD170309,BLEXP=BLEXPDB00000077743,COCONUT=CNP0348726	0.000123033	0.00011807	0.000119003	0.000433098	0.00039796	0.000405344	0	0	0	0	0	0	0.00012057	0.000113742	0.000116283	0.000123763	0.000325393	0.000302699	0.000427375	0	0	0	0
776	pos_4539	Simple ID		1	pos	4539	18.824	351.721	[M+2H]2+	generic	C38H59N3O9	CNP0444757	4.7319	4.7319	Unknown	3	67	351.721	[M+2H]2+	701.425	-0.0033166	2.782	Pentahydroxy bile acids, alcohols and derivatives	SQGJKVUDJJTKRW-UHFFFAOYSA-N	O=C1C(NCC(O)C)=C2C(CCC3(CCO)C(CCC23O)C(O)(C)C(O)C4OCC(C)C4C)C5(CCC6=CN=C(N)C=C6)CC(O)C(O)CC15	COCONUT=CNP0444757	0.000363484	0.000576363	0.000511497	0	0	0	0	0	0	0	0	0	6.03385e-05	0	0	0	0	0	0	0	0	0	0
777	pos_4561	Double ID		2	pos	4561	11.944	353.133	[M+H]+	generic	C16H20N2O7	Cotinine glucuronide	7.4037	7.4037	Unknown	3	33	353.133	[M+H]+	352.127	0.0010274	4.29	N-glucuronides	XWZCZWKUGIQPJD-UHFFFAOYNA-N	O=C([O-])C1OC([N+]=2C=CC=C(C2)C3N(C(=O)CC3)C)C(O)C(O)C1O	HMDB=HMDB0001013,SMPDB=PW_C000801,FooDB=FDB022370,BMDB=BMDB01013,Urine=HMDB0001013,Serum=HMDB0001013,PubChem=91820250;25201106;3398121,PlantCyc=CPD-2747,BLEXP=BLEXPDB00003398121,COCONUT=CNP0326006	0.00185895	0.00192332	0.00203823	0.000242164	0.000210912	0.000220954	0.00114983	0.0010473	0.00112973	0	0	0.00251799	0.000670007	0.000685881	0.000655341	0.000639479	0.000537941	0.00047383	0.000547903	0.00173035	0.00180434	0.0013093	0
778	pos_46	Unknown compound		1	pos	46	8.509	107.049	[M+H]+																		0.000282891	0.000328867	0.00034927	0.000146847	0.000170795	0.000167954	0.000209581	0.000249526	0.000242024	0.000507369	0.000625613	0.000624597	0.000226644	0.000210421	0.000218942	0	0.000296896	0.000138424	0.000287439	0	0	0	0
779	pos_4601	Simple ID		1	pos	4601	12.859	354.237	[M+H]+	generic	C18H31N3O4	N-{[6-({5-[(dimethylamino)methyl]-1,2-oxazol-3-yl}methyl)-3-hydroxyoxan-2-yl]methyl}-2,2-dimethylpropanamide	6.8003	6.8003	Unknown	3	64	354.237	[M+H]+	353.231	0.0013329	3.901	C-glycosyl compounds	OUDYAARWPPFEMY-UHFFFAOYSA-N	O=C(NCC1OC(CC2=NOC(=C2)CN(C)C)CCC1O)C(C)(C)C	COCONUT=CNP0005377	0.000214684	0.00021941	0.000217624	0	5.41313e-05	5.23279e-05	0	0	0	0.000240706	0.000192471	0.000199373	8.12366e-05	8.40412e-05	7.47026e-05	0	9.33853e-05	6.34029e-05	8.35454e-05	0	0	0.000163302	0
780	pos_4615	Simple ID		1	pos	4615	10.247	355.197	[M+H]+	generic	C16H26N4O5	2-({3-[(cyclohexylcarbamoyl)amino]-4,5-dihydroxycyclohex-1-en-1-yl}formamido)acetamide	6.7691	6.7691	Unknown	3	46	355.197	[M+H]+	354.19	0.0003964	3.955	N-acyl-alpha amino acids and derivatives	AAXAKLISUMJJGA-UHFFFAOYSA-N	O=C(NC1C=C(C(=O)NCC(=O)N)CC(O)C1O)NC2CCCCC2	COCONUT=CNP0294053	0.00051583	0.000509029	0.000551248	9.68386e-05	0.00012979	0.000105277	0.000171103	0.000155138	0.000161803	0.000578507	0.00059468	0.000615976	0.000221742	0.000240856	0.000240226	0.000259941	0.000188188	0.000168378	0.00019966	0.000379432	0.000367067	0.000301975	0
781	pos_4635	Simple ID		1	pos	4635	11.467	355.676	[M+2H]2+	generic	C30H47N9O11	UNPD183953	4.7155	4.7155	Unknown	3	58	355.675	[M+2H]2+	709.34	0.0030562	2.778	Peptides	LCVBAYACWMOBQZ-VLVBVMKLNA-N	O=CCC(NC(=O)C(NC(=O)C(NC(=O)C(NC(=O)C(NC(=N)N)C1=CC(O)=C(C(O)=C1)CO)CC(=O)N)C(C)(C)C)CCCCN)C(=O)O	UNPD=UNPD183953,COCONUT=CNP0154044	0	0	0	0	0	0	0	0	0	0	0	0	0.000179813	0.000178868	0.000211085	0.000193228	0	0	0	0	0	0	0
782	pos_4636	Simple ID		2	pos	4636	9.742	355.676	[M+2H]2+	generic	C30H47N9O11	2-{[6-amino-2-({2-[(2-{[2-carbamimidamido-2-(3,5-dihydroxy-4-methylphenyl)-1-hydroxyethylidene]amino}-1-hydroxy-3-(C-hydroxycarbonimidoyl)propylidene)amino]-1-hydroxy-3,3-dimethylbutylidene}amino)-1-hydroxyhexylidene]amino}butanedioic acid	4.8678	4.8678	Unknown	3	67	355.675	[M+2H]2+	709.34	0.0030562	2.716	Oligopeptides	VQHYEARHJYNYPS-UHFFFAOYSA-N	O=C(O)CC(N=C(O)C(N=C(O)C(N=C(O)C(N=C(O)C(NC(=N)N)C1=CC(O)=C(C(O)=C1)C)CC(=N)O)C(C)(C)C)CCCCN)C(=O)O	COCONUT=CNP0341496	0	0	0	0	0	0	0	0	0	0	0	0	6.06096e-05	6.78606e-05	7.35165e-05	6.75595e-05	0	0	0	0	0	0	0
783	pos_4639	Simple ID		1	pos	4639	9.055	356.101	[M+H]+	generic	C12H21NO9S	[(1R,2S,6S,9R,11R)-11-(hydroxymethyl)-4,4,11-trimethyl-3,5,7,10,12-pentaoxatricyclo[7.3.0.02,6]dodecan-6-yl]methyl sulfamate	4.7018	4.7018	Unknown	3	50	356.101	[M+H]+	355.094	0.0003787	3.208	Dioxolopyrans	RWNDWLAEFHRSEG-VZSYODPGSA-N	O=S(=O)(OCC12OCC3OC(OC3C2OC(O1)(C)C)(C)CO)N	BLEXP=BLEXPDB00029982168,COCONUT=CNP0347441	0.00063013	0.000669677	0.000607118	0	0	0	0.0035069	0.00269086	0.00292405	3.9589e-05	0	0	0.000676799	0.000733608	0.000744711	0.00078522	0	0	0	0.000596262	0.000643482	0.000740519	0
784	pos_1567	Simple ID	Other possible annotated peaks for this cluster.	6	pos	1567	13.182	218.138	[M+H]+	generic	C10H19NO4	Propionylcarnitine	5.8021	5.8021	Unknown	3	20	218.138	[M+H]+	217.131	0.0001845	3.514	Acyl carnitines	UFAHZIUFPNSHSL-UHFFFAOYNA-N	O=C([O-])CC(OC(=O)CC)C[N+](C)(C)C	HMDB=HMDB0000824;HMDB0062514,ChEBI=CHEBI:28867;CHEBI:53210;CHEBI:53211,SMPDB=PW_C000658,FooDB=FDB022268,BMDB=BMDB00824,LipidMAPS=LMFA07070005;LMFA07070099;LMFA07070105,Urine=HMDB0000824,Saliva=HMDB0000824,Feces=HMDB0000824,CSF=HMDB0000824,Serum=HMDB0000824,PubChem=107738,UNPD=UNPD152946,BLEXP=BLEXPDB00000107738,COCONUT=CNP0082874	0.000197666	0.000184982	0.00018762	0	0	0	0.00458516	0.00397034	0.00563143	4.15606e-05	0	8.76403e-05	0.000418377	0.00044219	0.000422432	0.000444539	8.57493e-05	0	8.9394e-05	0.00014425	0.000178288	9.5217e-05	0
785	pos_4646	Simple ID		1	pos	4646	13.761	356.207	[M+H]+	generic	C19H25N5O2	6-{[4-(3-hydroxyphenyl)-1H-1,2,3-triazol-1-yl]methyl}-N,N-dimethyl-1-azabicyclo[2.2.2]octane-3-carboxamide	5.4956	5.4956	Unknown	3	46	356.207	[M+H]+	355.201	0.0014015	3.218	Phenyl-1,2,3-triazoles	DUGBEHGBABJYFN-UHFFFAOYSA-N	O=C(N(C)C)C1CN2CCC1CC2CN3N=NC(=C3)C=4C=CC=C(O)C4	COCONUT=CNP0011584	0.000655088	0.000612354	0.00071001	0.00174559	0.00158546	0.00183156	0.000740387	0.000654762	0.00070135	0.0008417	0.000531701	0.000350832	0.000297571	0.000346671	0.000298671	0.00030115	0.00013917	0.000106881	0.00013112	0.000764744	0.000760086	0.00103072	0
786	pos_4647	Simple ID		1	pos	4647	10.985	356.207	[M+H]+	generic	C18H29NO6	UNPD215345	6.4849	6.4849	Unknown	3	110	356.207	[M+H]+	355.199	-0.0002359	3.899	Pyrrolizidines	PBNZHFUUVMKYRC-CERIUAPYSA-N	O=C1OCC2C(O)CN3CCC(OC(=O)C(C)(CC)C(O)(C)C1C)C32	UNPD=UNPD215345,COCONUT=CNP0283062	0	0	0	0.000879262	0.000995599	0.00142101	0	0	0	0	0	0	0.000161276	0.00017904	0.000173889	0.000170011	0	0	0	0	0	0	0
787	pos_4662	Simple ID		1	pos	4662	13.023	357.146	[M+Na]+	generic	C14H26N2O5S	N-(cyclopropylmethyl)-2-[(2S,5R,6R)-5-(ethylsulfonylamino)-6-(hydroxymethyl)-2-oxanyl]acetamide	5.4436	5.4436	Unknown	3	79	357.146	[M+Na]+	334.156	-0.0004364	3.283	C-glycosyl compounds	XDUFBJWVCOBYQZ-PCRUOVEUNA-N	O=C(NCC1CC1)CC2OC(CO)C(NS(=O)(=O)CC)CC2	ChEBI=CHEBI:118815	0.000178987	0.000135968	0.00016897	0.000103173	7.13329e-05	8.35499e-05	0	0	0	0.000362948	0.000407854	0.000455577	0.000150988	0.00017566	0.000143526	0.000177338	0.000115578	9.46591e-05	0.000101595	0.00164032	0.00140125	0.000554531	0
788	pos_4675	Simple ID		2	pos	4675	23.755	357.204	[M+H]+	generic	C18H24N6O2	CNP0444565	5.1963	5.1963	Unknown	3	152	357.204	[M+H]+	356.196	-0.0007495	3.272	Phenyltetrazoles and derivatives	SLBYSULWPZXBOP-UHFFFAOYSA-N	N=1N=C(C=2C=CC=C(C2)CN3CCCC3)N(N1)C4COC5C4OCC5N	COCONUT=CNP0444565	0.000175332	0.000169882	0.000173402	0	0	0	0.000297464	0.000266862	0.000256586	0	0	0	6.07638e-05	5.54432e-05	6.1937e-05	0	0	0	0	0	0	0	0
789	pos_11929	Simple ID	Other possible annotated peaks for this cluster.	5	pos	11929	14.142	696.434	[M+H]+	generic	C37H61NO11	Antibiotic A 11725Ia;Mycinamicin IV;Mycinomycin IV	6.8319	6.8319	Unknown	3	48	696.434	[M+H]+	695.424	-0.0018618	3.8	Aminoglycosides	DBTIHDIIXPQOFR-PVLCKBRHNA-N	O=C1OC(CC)C(C=CC=CC(=O)C(C)CC(C)C(OC2OC(C)CC(N(C)C)C2O)C(C=C1)C)COC3OC(C)C(O)C(OC)C3OC	KNApSAcK=C00018284,ChEBI=CHEBI:63284;CHEBI:63310,PubChem=56927800;6447311,UNPD=UNPD182247;UNPD191509;UNPD209160,NPA=NPA020416,COCONUT=CNP0149412	0.000221229	0.000198142	0.000239757	0	8.54212e-05	9.94256e-05	0.000147887	0.000157963	0.000133966	0.000285614	0.000219842	0.000155949	0.000378664	0.000343388	0.000344015	0.000337878	0.000108908	0.00355502	0.00013913	0.000199741	0.000153283	0.000202812	0
790	pos_4682	Simple ID		1	pos	4682	25.801	357.261	[M+Na]+	generic	C19H34N4O	[2-(dimethylamino)ethyl]({3-methyl-4-[(5-methyl-1,3,4-oxadiazol-2-yl)methyl]-6-(propan-2-yl)cyclohex-2-en-1-yl}methyl)amine	4.32	4.32	Unknown	3	15	357.261	[M+Na]+	334.273	0.0013824	2.396	Aromatic monoterpenoids	ACNDWXVHJOGGKH-UHFFFAOYSA-N	N=1N=C(OC1C)CC2C(=CC(CNCCN(C)C)C(C2)C(C)C)C	COCONUT=CNP0387396	6.83677e-05	6.46692e-05	7.9201e-05	0.000162895	0.000189854	0.000190854	0.000135644	0.00206771	0.00215551	8.55971e-05	7.29856e-05	9.33493e-05	0.000371754	0.000365031	0.000314201	0.000386678	0.000833927	0.000555765	0.000179221	0	0	0	0
791	pos_4697	Simple ID		1	pos	4697	22.906	358.236	[M+H]+	generic	C22H31NO3	Oxybutynin	6.6638	6.6638	Unknown	3	4	358.236	[M+H]+	357.23	0.0012703	3.981	Benzene and substituted derivatives	XIQVNETUBQGFHX-UHFFFAOYSA-N	O=C(OCC#CCN(CC)CC)C(O)(C=1C=CC=CC1)C2CCCCC2	HMDB=HMDB0015195,ChEBI=CHEBI:7856;CHEBI:51329,DrugBank=DB01062,STOFF=STOFF_4147,Urine=HMDB0015195,Serum=HMDB0015195,BLEXP=BLEXPDB00000004634,COCONUT=CNP0337966	0	0	0	0.000211389	0.000195527	0.000210611	0	0	0	7.93686e-05	8.42711e-05	0	8.19993e-05	6.07232e-05	6.01025e-05	0	0.000121285	0.000156626	0.000125683	0.000468576	0.000143319	0.000142947	0
792	pos_4711	Double ID		2	pos	4711	10.9	359.134	[M+H]+	generic	C17H18N4O5	202-791	6.2828	6.2828	Unknown	3	51	359.134	[M+H]+	358.128	0.0008961	3.804	Benzoxadiazoles	LYFZEFDZKPJBJK-YQTOOIBONA-N	O=C(OC(C)C)C1=C(NC(=C([N+](=O)[O-])C1C2=CC=CC3=NON=C32)C)C	ChEBI=CHEBI:34307,BLEXP=BLEXPDB00000005026	0.000141209	0.000152019	0.000161989	0	0	0	0.000313847	0.000292295	0.00029536	0	0.000147709	0.000194128	0.000127814	0.000136672	0.000163804	0.000147001	0.000165505	0.000119568	0.00015664	0.000313646	0.000314401	0.000229813	0
793	pos_4724	Simple ID		1	pos	4724	10.292	359.244	[M+H]+	generic	C20H30N4O2	1-(oxan-4-yl)-2'-[(pyridin-3-yl)methyl]-hexahydro-1'H-spiro[azetidine-3,4'-pyrrolo[1,2-a]pyrazin]-7'-ol	5.9581	5.9581	Unknown	3	56	359.244	[M+H]+	358.237	5.27e-05	3.515	Aralkylamines	UAHJNZLUOTXNJN-UHFFFAOYSA-N	OC1CN2C(CN(CC=3C=NC=CC3)CC24CN(C4)C5CCOCC5)C1	COCONUT=CNP0369241	8.19107e-05	9.60454e-05	8.80808e-05	0	0	0	0	0	0	0	0	0	0	0	0	5.7645e-05	0.00023574	0.000177397	0.00022252	0	0	0	0
794	pos_4737	Simple ID		1	pos	4737	12.829	360.155	[M+H]+	generic	C18H21N3O5	3-{3-hydroxy-6-[(morpholin-4-yl)methyl]-4-oxo-4H-pyran-2-yl}-3-(pyridin-4-yl)propanamide	6.3659	6.3659	Unknown	3	58	360.155	[M+H]+	359.148	0.0003972	3.682	Pyranones and derivatives	UJGXOQWPBJUJAV-UHFFFAOYSA-N	O=C1C=C(OC(=C1O)C(C=2C=CN=CC2)CC(=O)N)CN3CCOCC3	COCONUT=CNP0109439	0.000187635	0.000197183	0.000214575	6.17796e-05	4.32261e-05	4.92103e-05	0.000353159	0.000293266	0.000320307	0	0	0	0	0.000117908	0.000123704	0.000134008	0	0	0	0.000259275	0.000294969	0	0
795	pos_4739	Simple ID		1	pos	4739	12.181	360.19	[M+H]+	generic	C19H25N3O4	1-{2'-benzoyl-7'-hydroxy-hexahydro-1'H-spiro[azetidine-3,4'-pyrrolo[1,2-a]pyrazin]-1-yl}-3-hydroxypropan-1-one	6.7084	6.7084	Unknown	3	33	360.19	[M+H]+	359.185	0.0017827	3.781	Benzamides	JAQBOOQMBOQLLR-UHFFFAOYSA-N	O=C(C=1C=CC=CC1)N2CC3N(CC(O)C3)C4(C2)CN(C(=O)CCO)C4	COCONUT=CNP0250177	0.000127781	0.00012854	0.00012977	0	0	0	0	0	0	0.0012663	0.00136361	0.000981525	0	0	0	0.000113726	0	0	0	0	0	0	0
796	pos_4740	Simple ID		1	pos	4740	12.585	360.19	[M+H]+	generic	C19H25N3O4	1-{2'-benzoyl-7'-hydroxy-hexahydro-1'H-spiro[azetidine-3,4'-pyrrolo[1,2-a]pyrazin]-1-yl}-3-hydroxypropan-1-one	7.0944	7.0944	Unknown	3	27	360.19	[M+H]+	359.185	0.0014827	4.137	Benzamides	JAQBOOQMBOQLLR-UHFFFAOYSA-N	O=C(C=1C=CC=CC1)N2CC3N(CC(O)C3)C4(C2)CN(C(=O)CCO)C4	COCONUT=CNP0250177	0	0	0	0	0	0	0	0	0	0.00208736	0.00193943	0.00191445	0.000180531	0	0	0	0	0	0	0	0	0.000581507	0
797	pos_3832	Simple ID	Other possible annotated peaks for this cluster.	2	pos	3832	23.227	320.221	[M+H]+	generic	C19H29NO3	UNPD180049	7.0003	7.0003	Unknown	3	44	320.221	[M+H]+	319.215	0.0013202	3.811	Monocyclic monoterpenoids	CFXXCKIWSIISPX-BTOVYPRBNA-N	O=C1C(=C(N=C(O)C1(O)C)CC=C(C)CC=CC(C)C)CCC	UNPD=UNPD180049,NPA=NPA019640,COCONUT=CNP0239541	0	0	0	0.00313745	0.00179803	0.00193201	0	0	0	0	0	0	0.000384072	0.0003067	0.000287713	0.000293039	0	0	0	0	0	0	0
798	pos_4755	Simple ID		1	pos	4755	15.589	361.139	[M+H]+	generic	C18H20N2O6	3-Methoxytyramine BX	7.0739	7.0739	Unknown	3	54	361.139	[M+H]+	360.132	0.0001128	3.97	Methoxyphenols	SBHOSQZNRDXQAX-JBACSLPBNA-N	O=C(O)C1=CC(=CC=NCCC2=CC=C(O)C(OC)=C2)CC(N1)C(=O)O	KNApSAcK=C00036555,ChEBI=CHEBI:81319,PlantCyc=CPD-8757,UNPD=UNPD183779,COCONUT=CNP0189149	0.000113765	0.000143155	0.000104313	0	0	0	0.000151063	0	8.04839e-05	0.000224185	0.000183287	0.00014008	7.1745e-05	7.29889e-05	6.94505e-05	7.43894e-05	0.000102302	6.13285e-05	9.8101e-05	0.000191341	0.000325578	0.000399048	0
799	pos_5295	Simple ID	Other possible annotated peaks for this cluster.	6	pos	5295	16.033	383.158	[M+Na]+	generic	C19H24N2O5	3-{3-hydroxy-4-oxo-6-[(piperidin-1-yl)methyl]-4H-pyran-2-yl}-3-(5-methylfuran-2-yl)propanamide	6.2002	6.2002	Unknown	3	39	383.158	[M+Na]+	360.169	-0.0002574	3.783	Pyranones and derivatives	BCZJRMLQWKDOAJ-UHFFFAOYSA-N	O=C1C=C(OC(=C1O)C(C=2OC(=CC2)C)CC(=O)N)CN3CCCCC3	COCONUT=CNP0409120	0.00160213	0.00156684	0.00159257	0.0030839	0.00247799	0.00282767	0.00314022	0.00238661	0.00226232	0.0013257	0.00257984	0.00306837	0.00157228	0.00154352	0.00153909	0.00158722	0.00200011	0.00100642	0.00155726	0	0	0	0
800	pos_4764	Unknown compound		1	pos	4764	14.151	361.218	[M+H]+																		0	0	0	0	3.72267e-05	0	0	0.000280475	0.000449643	0	0	0	0.00012596	0.000127177	0.000122935	0.000104445	0.000224317	0	0.00023924	0	8.01115e-05	0	0
801	pos_4778	Simple ID	Other possible annotated peaks for this cluster.	2	pos	4778	11.741	362.169	[M+Na]+	generic	C16H25N3O5	methyl 2-[7'-hydroxy-1-(2-methylpropyl)-1',3'-dioxo-hexahydro-1'H-spiro[azetidine-3,4'-pyrrolo[1,2-a]pyrazin]-2'-yl]acetate	6.4121	6.4121	Unknown	3	70	362.169	[M+Na]+	339.179	-5.84e-05	3.762	Alpha amino acid esters	LSZUJRVRTASAPU-UHFFFAOYSA-N	O=C(OC)CN1C(=O)C2N(CC(O)C2)C3(C1=O)CN(CC(C)C)C3	COCONUT=CNP0007254	0.000379613	0.000408967	0.000399404	0.000128544	0.000136051	0	0.000310172	0.000281103	0.00029537	0.000291645	0.000297278	0.000293739	0.000188814	0.000187612	0.000169704	0.000194817	0	0	0	0.000262736	0.000309185	0.000270583	0
802	pos_4787	Simple ID		1	pos	4787	13.38	362.207	[M+H]+	generic	C19H27N3O4	N-({4-[(1-acetylpiperidin-4-yl)amino]-3-hydroxyoxolan-2-yl}methyl)benzamide	5.7787	5.7787	Unknown	3	44	362.207	[M+H]+	361.2	0.0008328	3.182	N-acylpiperidines	MJKYTIALISUBJQ-UHFFFAOYSA-N	O=C(NCC1OCC(NC2CCN(C(=O)C)CC2)C1O)C=3C=CC=CC3	COCONUT=CNP0005152	0.000335401	0.000330808	0.000311104	0	0	0	0.000138563	9.20956e-05	0	0.000187409	0.000156518	0	7.64716e-05	8.32747e-05	7.60124e-05	8.32009e-05	0	0	0	0	0	0	0
803	pos_4806	Unknown compound		1	pos	4806	10.643	363.161	[M+Na]+																		0	7.38165e-05	0	6.59125e-05	0	0	0.000115024	0.000148407	0.000189988	0	0	0.000118664	0.000176137	0.000195946	0.000182515	0.000192651	0.000203125	0.000395373	0.00111341	0.000236279	0.000210373	0.000147202	0
804	pos_5365	Simple ID	Other possible annotated peaks for this cluster.	3	pos	5365	16.78	385.177	[M+Na]+	generic	C16H30N2O5S	(3R)-3-hydroxy-2,2-dimethyl-4-oxo-4-({3-oxo-3-[(2-sulfanylethyl)amino]propyl}amino)butyl 2,2-dimethylpropanoate	6.3497	6.3497	Unknown	3	33	385.177	[M+Na]+	362.188	-0.0001362	3.748	Beta amino acids and derivatives	KVQSHCZSRKQWCB-STGVRZAANA-N	O=C(NCCS)CCNC(=O)C(O)C(C)(C)COC(=O)C(C)(C)C	DrugBank=DB08408	0.00294391	0.00293515	0.00302845	0.00418776	0.00329855	0.00385444	0.00116374	0.000462288	0.000434001	0.00193379	0.00197026	0.00185894	0.0022313	0.00226531	0.0022376	0.00226822	0.00326276	0.00296034	0.00301698	0.00382432	0.00357483	0.00340242	0
805	pos_4834	Unknown compound		1	pos	4834	9.538	364.183	[M+H]+																		0.000252177	0.000233399	0.000256474	0	4.43189e-05	0	0.000308715	0.000274427	0.000288438	0.000105109	0.000123994	0.000160738	9.7155e-05	0.000114113	0.000114154	0.000108808	7.18361e-05	5.62497e-05	0	0	0	0	0
806	pos_4836	Simple ID		1	pos	4836	13.946	364.186	[M+H]+	generic	C18H25N3O5	N-cyclopropyl-2-[3,4-dihydroxy-5-({[(4-methylphenyl)carbamoyl]amino}methyl)oxolan-2-yl]acetamide	6.6839	6.6839	Unknown	3	82	364.186	[M+H]+	363.179	0.0003974	3.826	C-glycosyl compounds	WAWDUTIKQVSFFS-UHFFFAOYSA-N	O=C(NC1=CC=C(C=C1)C)NCC2OC(CC(=O)NC3CC3)C(O)C2O	COCONUT=CNP0259789	0	0	0	0	0	0	0	0	0	0.0001914	0.000178565	0.000163666	6.66661e-05	0	0	0	0.000103254	0.000100758	0.000109633	0.000240178	0.000271192	0.000251902	0
807	pos_4863	Simple ID		1	pos	4863	9.327	365.192	[M+H]+	generic	C16H24N6O4	N-[(4-{bis[(1H-imidazol-2-yl)methyl]amino}-3-hydroxyoxolan-2-yl)methyl]-2-methoxyacetamide	6.1826	6.1826	Unknown	3	52	365.192	[M+H]+	364.186	0.0014797	3.493	Aralkylamines	GRTAGZSLLKOOAG-UHFFFAOYSA-N	O=C(NCC1OCC(N(CC2=NC=CN2)CC3=NC=CN3)C1O)COC	COCONUT=CNP0199995	9.99072e-05	0.000107822	0	6.04065e-05	5.9598e-05	5.31127e-05	0	0	0	0.000180072	0	0.000220883	7.48151e-05	7.16097e-05	7.05622e-05	7.53754e-05	0.000127915	9.4983e-05	0.000121873	0.000225185	0.000257275	0.000144776	6.37856e-05
808	pos_4869	Unknown compound		1	pos	4869	14.641	365.224	[M+2H]2+																		0	0	0	0.00429315	0.00465107	0.00621884	0	0	0	0	0	0	0.000750683	0.000731637	0.000685594	0.00071804	0	0	0	0	0	0	0
809	pos_4895	Simple ID		1	pos	4895	14.46	366.201	[M+H]+	generic	C18H27N3O5	UNPD115091	6.1702	6.1702	Unknown	3	79	366.201	[M+H]+	365.195	0.0012474	3.767	Oligopeptides	SUPVSFFZWVOEOI-SWLHIULTNA-N	O=C(O)C(NC(=O)C(NC(=O)C(N)CC(C)C)C)CC1=CC=C(O)C=C1	UNPD=UNPD115091,COCONUT=CNP0197243	0.000219957	0.0002149	0.000219232	0.000138136	0.000154423	0.00014002	0	0	0	0.000381234	0.000367578	0.000318606	0.000117676	0.000107015	0	0.000118616	0.000147325	0.000118969	0.000146667	0.000288065	0.000350189	0.000290796	0
810	pos_4896	Simple ID		1	pos	4896	12.166	366.201	[M+H]+	generic	C18H27N3O5	CNP0429230	6.1526	6.1526	Unknown	3	56	366.201	[M+H]+	365.195	0.0012474	3.62	Phenylpiperazines	CFOSTRFEDMTNCM-UHFFFAOYSA-N	O=C(N1CCN(C=2C=CC=CC2OC)CC1)CC3OC(CN)C(O)C3O	COCONUT=CNP0429230	9.37389e-05	8.74305e-05	0.000101633	9.06595e-05	8.6811e-05	8.61808e-05	0.000286091	0.000242826	0.000264847	0.00029186	0.000236722	0.00022383	0	0	0	0.00011516	0	0	0	0.000206542	0.000235156	0.000233793	0
811	pos_4898	Double ID		2	pos	4898	15.737	366.201	[M+H]+	generic	C18H27N3O5	UNPD115091	7.1351	7.1351	Unknown	3	29	366.201	[M+H]+	365.195	0.0009474	4.33	Oligopeptides	SUPVSFFZWVOEOI-SWLHIULTNA-N	O=C(O)C(NC(=O)C(NC(=O)C(N)CC(C)C)C)CC1=CC=C(O)C=C1	UNPD=UNPD115091,COCONUT=CNP0197243	0.00154206	0.00146968	0.00133252	0.000745913	0.000678839	0.000699103	0.000659353	0.000245965	0.000238162	0.000637334	0.000790995	0.000663318	0.000504732	0.000454847	0.000472183	0.000497997	0.000150441	0.000491331	0.000193341	0.000860273	0.000902941	0.000575703	0
812	pos_4899	Double ID		2	pos	4899	15.47	366.201	[M+H]+	generic	C18H27N3O5	1-(4-{[4-(2-ethoxyethyl)-5-oxomorpholin-3-yl](hydroxy)methyl}phenyl)-3-ethylurea	6.9614	6.9614	Unknown	3	30	366.201	[M+H]+	365.195	0.0009474	4.264	N-phenylureas	IDGOGRIFWFDGSF-UHFFFAOYSA-N	O=C(NC1=CC=C(C=C1)C(O)C2N(C(=O)COC2)CCOCC)NCC	COCONUT=CNP0079713	0.000929943	0.000880467	0.000863463	0.000338466	0.000299234	0.000313464	0.000466797	0.000245333	0.00024301	0.000593181	0.000630005	0.000584301	0.000340126	0.000357913	0.000319772	0.000351726	0.000201534	0.000244175	0.000230377	0.000828402	0.000816413	0.000534295	0
[truncated: 334 more rows]
[truncated: 12 more columns]

## Sheet: S6
Table S6. Secondary metabolite biosynthetic gene clusters (SM-BGCs) of the nine Aquimarina strains studied here grouped into Gene Cluster Families (GCFs).
[truncated: 97 more rows]

## Sheet: S7
Table S7. Genome assembly statistics of the nine Aquimarina strains analysed in this study.
[truncated: 17 more rows]

## Sheet: S8
Table S8. BiG-SCAPE sequence similarity network (SSN) pairwise results below raw distance 0.3 cut-off.
[truncated: 76 more rows]
